# Supplementary material
Source: publisher figshare collection journal article supplement (https://geolsoc.figshare.com/ndownloader/files/28222328)
Supplement: Supplementary file 1 [file 28222328]

## Sheet: Olivine
Composition of olivine from the Upper Muna kimberlites, wt%
№	m3-15	M3-14	M3-11	m3-7	m3-9	8d/257im24-1	8d/257im24-2	8d/257im24-3	8d/119im31-1	8d/119im31-2	8d/119im31-3	302/24im8-1	302/24im8-2	328/6im11-1	328/6im11-2	Kos_M_04/4_6c ol	Kos_M_04/4_7c ol	Kos_M_04/4_8c ol	Kos_M_04/4_1c ol	Kos_M_04/4_2c ol	Kos_M_04/4_3c ol	Kos_M_04/4c ol	Kos_M_04/4_5c ol	Kos_m_2/8_2 ol	Kos_m_2/8_3 ol	Kos_m_2/8_4 ol	Kos_M_04/1_1c (1)ol	Kos_M_04/1_1r ol	Kos_M_04/1_2c ol	Kos_M_04/1_2r ol	Kos_M_04/1_2c ol	Kos_M_04/1_3c ol	Kos_M_04/1_4c ol	Kos_M_04/1_5c ol	Kos_M_04/1_6c ol	Kos_M_04/1_6r ol	Kos_M_04/1_7 ol	Kos_M_04/1_8c ol	Kos_M_04/1_9c ol	Kos_M_04/1_10c ol	Kos_M_04/2_1c ol	Kos_M_04/2_1r ol	Kos_M_04/3_3c ol	Kos_M_04/3_4c ol	Kos_M_04/3_5c ol	Kos_M_04/3_6c ol	Kos_M_04/3_14c оливин	Kos_M_04/2_3c ol	Kos_M_04/2_3c ol
Pipe	Deimos	Deimos	Deimos	Deimos	Deimos	Deimos	Deimos	Deimos	Deimos	Deimos	Deimos	Komsomolskaya-M	Komsomolskaya-M	Komsomolskaya-M	Komsomolskaya-M	Komsomolskaya-M	Komsomolskaya-M	Komsomolskaya-M	Komsomolskaya-M	Komsomolskaya-M	Komsomolskaya-M	Komsomolskaya-M	Komsomolskaya-M	Komsomolskaya-M	Komsomolskaya-M	Komsomolskaya-M	Komsomolskaya-M	Komsomolskaya-M	Komsomolskaya-M	Komsomolskaya-M	Komsomolskaya-M	Komsomolskaya-M	Komsomolskaya-M	Komsomolskaya-M	Komsomolskaya-M	Komsomolskaya-M	Komsomolskaya-M	Komsomolskaya-M	Komsomolskaya-M	Komsomolskaya-M	Komsomolskaya-M	Komsomolskaya-M	Komsomolskaya-M	Komsomolskaya-M	Komsomolskaya-M	Komsomolskaya-M	Komsomolskaya-M	Komsomolskaya-M	Komsomolskaya-M
Type	phenocryst	phenocryst	phenocryst	phenocryst	phenocryst	phenocryst	phenocryst	phenocryst	phenocryst	phenocryst	phenocryst	phenocryst	phenocryst	phenocryst	phenocryst	phenocryst	phenocryst	phenocryst	phenocryst	phenocryst	phenocryst	phenocryst	phenocryst	phenocryst	phenocryst	phenocryst	phenocryst	phenocryst	phenocryst	phenocryst	phenocryst	phenocryst	phenocryst	phenocryst	phenocryst	phenocryst	phenocryst	phenocryst	phenocryst	phenocryst	phenocryst	phenocryst	phenocryst	phenocryst	phenocryst	phenocryst	phenocryst	phenocryst	phenocryst
SiO2	39.91	40.19	40.7	40.28	40.58	42.098	42.61	42.077	41.584	42.803	43.559	42.03	40.195	42.355	42.128	41.128	40.747	41.414	40.802	41.058	41.007	40.681	40.924	41.913	41.364	41.379	41.014	40.629	39.99	39.822	40.542	37.057	42.082	40.803	41.546	41.807	40.884	40.968	41.122	41.474	40.417	40.708	41.671	40.928	41.124	41.191	41.687	39.889	40.628
TiO2	0.04	0	0.05	0	0	0.004	0	0.01	0.022	0.004	0.029	0.002	0.034	0	0
Al2O3						0.024	0.004	0	0.035	0.015	0	0	0.043	0	0.004
Cr2O3				0	0	0.033	0.037	0.007	0.027	0.022	0.049	0.016	0.024	0.054	0.031
FeO	11.27	7.75	7.77	7.56	6.64	7.013	6.423	8.76	9.217	7.549	6.816	6.989	10.032	8.444	7.05	6.237	6.429	5.858	8.381	6.676	6.848	9.032	8.485	7.861	10.599	7.33	7.646	7.799	8.196	8.242	8.087	5.005	5.58	7.905	6.274	6.116	9.091	9.841	6.34	5.669	9.298	8.72	5.601	8.915	7.915	6.988	6.74	6.24	6.328
MnO	0.07	0.04		0.03	0	0.105	0.065	0.088	0.11	0.085	0.094	0.084	0.097	0.11	0.081	0.115	0.115	0.115	0.141	0.115	0.115	0.116	0.115	0.1	0.128	0.102	0.115	0.115	0.115	0.115	0.115	0.112	0.115	0.115	0.115	0.115	0.114	0.116	0.113	0.113	0.114	0.114	0.113	0.116	0.115	0.115	0.115	0.115	0.115
MgO	46.58	49.36	49.97	51.1	50.38	49.625	50.232	48.1	48.53	49.52	49.681	50.622	50.242	48.554	49.444	52.402	51.986	52.421	50.23	51.624	51.986	49.744	50.362	50.466	48.046	51.388	50.981	51.143	50.536	51.275	50.641	38.248	52.044	50.927	51.726	51.899	49.587	48.919	52.295	53.039	50.322	50.248	53.25	49.712	50.948	51.727	51.921	51.777	52.421
NiO	0.26	0.39	0.36	0.37	0.32	0.309	0.297	0.298	0.31	0.341	0.311	0.286	0.3	0.324	0.355	0.206	0.232	0.322	0.347	0.231	0.283	0.102	0.259	0.129	0.305	0.337	0.412	0.405	0.42	0.375	0.285	0.32	0.231	0.346	0.246	0.262	0.253	0.203	0.302	0.363	0.318	0.329	0.229	0.246	0.245	0.366	0.159	0.366	0.335
CaO	0.07	0.03	0.05	0.02	0	0.019	0.005	0.007	0.022	0.023	0.036	0.014	0.059	0.033	0.031
Total	99.341	99.741	98.803	99.389	100.373	99.23	99.673	99.347	99.857	100.362	100.575	100.043	101.026	99.874	99.124	100.088	99.509	100.13	99.901	99.704	100.239	99.675	100.145	100.469	100.442	100.536	100.168	100.091	99.257	99.829	99.67	80.742	100.052	100.096	99.907	100.199	99.929	100.047	100.172	100.658	100.469	100.119	100.864	99.917	100.347	100.387	100.622	98.387	99.827
No Oxyg	4	4	4	4	4	4	4	4	4	4	4	4	4	4	4	4	4	4	4	4	4	4	4	4	4	4	4	4	4	4	4	4	4	4	4	4	4	4	4	4	4	4	4	4	4	4	4	4	4
Si	1.00346	0.999583	0.999928	0.986005	1.0015	1.02374	1.02781	1.0292	1.01599	1.03032	1.04113	1.01454	0.979037	1.02923	1.02567	0.991895	0.989872	0.996529	0.995812	0.995686	0.990705	0.996753	0.996146	1.01103	1.01152	0.997957	0.995161	0.988254	0.983712	0.974974	0.990826	1.09255	1.00976	0.992082	1.00263	1.00493	0.999639	1.00316	0.991809	0.992512	0.985888	0.993003	0.993992	0.999961	0.99625	0.994155	1.00065	0.981414	0.984537
Ti	0.000756432	0	0.000923924	0	0	7.31609e-05	0	0.00018397	0.000404277	7.24187e-05	0.000521335	3.63105e-05	0.00062287	0	0	0	0	0	0	0	0	0	0	0	0	0	0	0	0	0	0	0	0	0	0	0	0	0	0	0	0	0	0	0	0	0	0	0	0
Al	0	0	0	0	0	0.00068781	0.000113708	0	0.00100777	0.00042552	0	0	0.00123431	0	0.00011477	0	0	0	0	0	0	0	0	0	0	0	0	0	0	0	0	0	0	0	0	0	0	0	0	0	0	0	0	0	0	0	0	0	0
Cr	0	0	0	0	0	0.000634433	0.000705584	0.000135363	0.000521523	0.000418665	0.000925908	0.000305334	0.00046215	0.0010374	0.000596683	0	0	0	0	0	0	0	0	0	0	0	0	0	0	0	0	0	0	0	0	0	0	0	0	0	0	0	0	0	0	0	0	0	0
Fe(ii)	0.236944	0.161178	0.159624	0.154744	0.137028	0.142605	0.129552	0.179169	0.188303	0.151947	0.136226	0.141068	0.204323	0.171576	0.143526	0.125779	0.130596	0.117868	0.171039	0.135377	0.138342	0.185047	0.172703	0.158561	0.21673	0.147822	0.155131	0.158626	0.168586	0.168735	0.165266	0.123389	0.111959	0.160716	0.126608	0.122929	0.185868	0.201497	0.127863	0.113441	0.189651	0.177865	0.111717	0.182132	0.160335	0.141029	0.135283	0.128377	0.128226
Mn	0.00149058	0.000842558	0	0.000621942	0	0.0021625	0.00132787	0.00182296	0.00227612	0.00173283	0.0019028	0.00171723	0.00200096	0.0022638	0.00167017	0.0023489	0.00236603	0.00234358	0.00291443	0.0023619	0.00235301	0.00240709	0.00237073	0.00204293	0.00265093	0.00208339	0.00236319	0.00236902	0.00239581	0.00238455	0.00238029	0.00279657	0.00233699	0.00236806	0.00235044	0.00234111	0.00236066	0.00240559	0.00230819	0.00229022	0.00235509	0.00235513	0.00228279	0.00240027	0.00235944	0.00235065	0.00233785	0.00239627	0.00236017
Mg	1.74599	1.83021	1.83024	1.86481	1.85362	1.79909	1.80637	1.75399	1.76766	1.77707	1.77028	1.82169	1.82439	1.75896	1.79463	1.88409	1.88276	1.8805	1.82761	1.86638	1.8724	1.81703	1.82756	1.81484	1.75159	1.84764	1.84414	1.85457	1.85328	1.87155	1.8451	1.68114	1.86173	1.84599	1.861	1.85981	1.80752	1.78578	1.88035	1.89226	1.82998	1.82732	1.89362	1.81071	1.84003	1.8612	1.85801	1.89916	1.89381
Ni	0.00525846	0.00780249	0.0071145	0.00728549	0.00635266	0.0060444	0.0057627	0.00586327	0.00609247	0.00660269	0.00597936	0.0055532	0.00587781	0.00633313	0.00695237	0.00399634	0.00453356	0.00623255	0.00681228	0.00450613	0.00549972	0.00201031	0.00507121	0.00250306	0.00599953	0.00653776	0.00804129	0.00792419	0.00831061	0.00738531	0.00560279	0.00758903	0.00445862	0.00676704	0.00477546	0.00506587	0.00497597	0.00399842	0.00585906	0.0069877	0.00623962	0.00645556	0.00439392	0.00483465	0.00477427	0.00710559	0.00307005	0.00724348	0.00653008
Ca	0.00188555	0.000799363	0.00131603	0.000524495	0	0.000494997	0.000129209	0.000183432	0.00057585	0.000593128	0.000921831	0.000362043	0.00153958	0.000859096	0.000808576	0	0	0	0	0	0	0	0	0	0	0	0	0	0	0	0	0	0	0	0	0	0	0	0	0	0	0	0	0	0	0	0	0	0
TOTAL	2.99578	3.00042	2.99915	3.01399	2.9985	2.97553	2.97178	2.97055	2.98284	2.96918	2.95789	2.98527	3.01949	2.97026	2.97397	3.00811	3.01013	3.00347	3.00419	3.00431	3.0093	3.00325	3.00385	2.98897	2.98848	3.00204	3.00484	3.01175	3.01629	3.02503	3.00917	2.90745	2.99024	3.00792	2.99737	2.99507	3.00036	2.99684	3.00819	3.00749	3.01411	3.007	3.00601	3.00004	3.00375	3.00584	2.99935	3.01859	3.01546
Mg#	88.0509	91.9062	91.9781	92.3377	93.1164	92.6556	93.308	90.7318	90.3729	92.1231	92.8547	92.8128	89.9285	91.1125	92.5947	93.7419	93.5135	94.1018	91.4423	93.2371	93.1199	90.7572	91.366	91.9651	88.9891	92.5921	92.2406	92.1207	91.6619	91.7298	91.7793	93.1622	94.3274	91.991	93.6301	93.8	90.6758	89.8607	93.633	94.3441	90.6096	91.1297	94.429	90.8607	91.9847	92.9564	93.2131	93.6683	93.6586
Te	0.0750425	0.0422752	0	0.0307785	0	0.111219	0.0685392	0.094202	0.116199	0.0897217	0.099658	0.087398	0.0984597	0.117073	0.086063
Fo	87.9012	91.8305	91.9174	92.2853	93.1164	92.529	93.2378	90.6377	90.2413	92.0121	92.7173	92.7145	89.7718	90.9654	92.4765
Fa	11.9288	8.08708	8.01655	7.65794	6.88358	7.33431	6.68695	9.25862	9.61309	7.86742	7.13474	7.17963	10.054	8.87314	7.3958
Ca-Ol	0.0949272	0.0401079	0.066093	0.0259561	0	0.0254582	0.00666928	0.00947892	0.0293978	0.0307107	0.0482803	0.0184261	0.0757569	0.0444285	0.0416655
[truncated: 125 more columns]

## Sheet: Garnet
Table S5. Composition of garnet from the Upper Muna kimberlites, wt%
No.	Pipe	SiO2	TiO2	Al2O3	Cr2O3	FeO	MnO	MgO	CaO	Na2O	Total
102-2\157	Zapolarnaya	39.27	0.048	21.466	0.818	14.4102	0.351	16.746	5.192	0.041	98.3422
101\105	Zapolarnaya	41.418	0.42	18.865	5.298	7.08186	0.321	21.7658	4.57	0.095	99.8346
101\105	Zapolarnaya	40.615	0.665	15.844	8.957	6.90438	0.352	20.4296	5.856	0.086	99.709
101\105	Zapolarnaya	41.52	1.23	20.513	0.8	10.9242	0.306	20.7601	4.402	0.096	100.551
101\105	Zapolarnaya	41.218	0.873	19.321	4.041	6.80238	0.301	22.3309	4.565	0.048	99.5002
101\105	Zapolarnaya	41.673	0.437	20.375	2.873	7.0635	0.339	22.2564	3.976	0.077	99.0699
101\17	Zapolarnaya	40.501	0.57	17.673	6.163	7.6959	0.311	20.3643	5.327	0.1	99.144
101\17	Zapolarnaya	40.738	0.793	19.852	2.749	9.6543	0.324	20.2541	4.415	0.097	98.979
101\17	Zapolarnaya	41.493	0.575	20.639	2.369	7.59288	0.327	21.8882	4.389	0.057	98.773
101\17	Zapolarnaya	41.492	0.386	20.349	2.809	8.06412	0.32	21.6862	4.357	0.048	99.172
101\17	Zapolarnaya	40.658	0.818	18.285	5.428	7.67958	0.309	20.9855	5.16	0.081	98.829
101\17	Zapolarnaya	41.459	0.817	19.927	1.784	8.0427	0.253	22.0779	4.284	0.126	99.263
101\17	Zapolarnaya	41.568	1.087	20.639	0.801	10.6672	0.235	21.0161	4.166	0.136	100.18
101\25	Zapolarnaya	41.688	0.307	19.483	4.474	6.95742	0.276	22.2156	4.663	0.076	99.911
101\80	Zapolarnaya	41.465	0.988	19.767	2.109	9.51762	0.354	20.755	4.602	0.09	99.869
101\80	Zapolarnaya	41.982	0.871	20.914	1.033	9.6237	0.264	21.7219	4.193	0.085	99.399
102 ïð.2	Zapolarnaya	41.14	0.413	18.715	5.828	6.726	0.277	20.884	5.064	0.088	99.921
102 ïð.2	Zapolarnaya	41.548	0.347	19.505	5.045	6.604	0.318	21.223	4.316	0.055	98.961
102 ïð.2	Zapolarnaya	41.502	0.432	18.999	4.507	8.031	0.318	20.112	4.816	0.051	98.768
102 ïð.2	Zapolarnaya	41.991	0.38	19.45	5.03	6.654	0.335	21.023	4.257	0.045	99.165
102 ïð.2	Zapolarnaya	41.708	0.411	18.222	5.888	6.693	0.277	20.662	4.907	0.061	98.829
102 ïð.2	Zapolarnaya	41.709	0.953	21.188	0.844	9.495	0.252	20.477	4.189	0.156	99.263
102 ïð.2	Zapolarnaya	41.9	1.098	20.882	0.929	10.172	0.281	20.486	4.284	0.147	100.179
102 ïð.2	Zapolarnaya	41.595	1.118	20.843	1.012	10.237	0.268	20.167	4.566	0.078	99.884
102 ïð.2	Zapolarnaya	42.031	1.041	20.873	1.004	9.763	0.258	20.487	4.281	0.125	99.863
102 ïð.2	Zapolarnaya	40.616	1.371	17.31	4.83	11.357	0.351	18.116	5.29	0.132	99.373
102 ïð.2	Zapolarnaya	40.485	1.418	17.18	5.135	11.557	0.389	18.211	5.373	0.173	99.01
102-2\156	Zapolarnaya	39.913	1.086	14.859	7.93114	11.116	0.325	17.385	6.133	0.147	98.8951
102-2\156	Zapolarnaya	38.946	0.046	21.353	0.01274	26.694	0.747	7.062	6.493	0.058	101.412
102-2\156	Zapolarnaya	41.033	0	0.04	0.20286	7.547	0.077	50.541	0.031	0.033	99.5049
102-2\156	Zapolarnaya	41.036	0.47	17.357	7.55286	7.287	0.373	19.731	6.432	0.11	100.349
107\47	Zapolarnaya	41.518	1.198	20.183	0.881	10.4825	0.278	21.5934	4.416	0.083	100.633
107\47	Zapolarnaya	41.318	0.508	20.651	2.452	7.77444	0.273	21.6005	4.309	0.066	98.952
107\47	Zapolarnaya	40.332	0.116	17.096	7.348	6.77586	0.334	20.8202	5.115	0	97.9371
107\47	Zapolarnaya	41.099	0.432	19.621	4.274	7.12878	0.292	21.2843	4.738	0.055	98.9241
107\47	Zapolarnaya	40.564	1.145	18.24	4.136	8.2161	0.306	20.6621	5.341	0.078	98.6882
107\47	Zapolarnaya	40.647	0.336	18.95	5.035	7.15734	0.357	21.2415	4.655	0.055	98.4338
107\87	Zapolarnaya	41.202	0.377	18.479	5.267	7.92846	0.294	20.7601	5.22	0.096	99.6235
107\87	Zapolarnaya	41.365	0.376	19.676	4.522	6.96456	0.319	21.6515	5.263	0.03	100.167
107\87	Zapolarnaya	41.381	0.081	19.208	4.962	7.58982	0.312	21.112	5.042	0.049	99.7368
107\87	Zapolarnaya	41.781	0	16.518	9.873	6.00678	0.347	24.8278	1.441	0.028	100.823
107\87	Zapolarnaya	41.583	0.221	18.283	5.649	7.02066	0.305	21.5608	5.034	0.061	99.7174
107\87	Zapolarnaya	41.484	0.698	19.339	3.948	7.97538	0.339	21.4771	4.793	0.058	100.112
107\87	Zapolarnaya	41.199	0.145	18.547	5.743	7.61736	0.313	21.2476	5.057	0.006	99.875
107\87	Zapolarnaya	41.888	0.401	20.331	3.29	7.23588	0.312	22.0085	4.407	0.018	99.8914
107\87	Zapolarnaya	41.421	0.204	20.58	3.533	6.74628	0.322	21.9484	4.35	0.054	99.1586
110\177	Zapolarnaya	41.722	0.342	18.804	5.734	6.66468	0.299	22.0912	4.574	0.122	100.353
110\177	Zapolarnaya	42.498	0.015	20.717	3.788	5.74872	0.278	24.7564	2.6	0.064	100.465
110\177	Zapolarnaya	41.531	0.617	19.879	3.04	8.262	0.309	21.6699	4.419	0.116	99.8429
110\177	Zapolarnaya	41.233	0.421	20.068	3.381	6.95436	0.3	21.8617	4.403	0.069	98.691
110\177	Zapolarnaya	41.261	0.382	19.647	4.311	7.04718	0.318	22.2074	4.432	0.085	99.6906
110\177	Zapolarnaya	41.168	0.57	20.099	2.713	7.21038	0.286	22.1452	4.249	0.125	98.5656
110\177	Zapolarnaya	40.17	0.59	19.248	4.15	7.13388	0.3	21.5863	4.706	0.058	97.9421
110\177	Zapolarnaya	41.1	1.086	19.827	0.907	10.5774	0.24	20.7305	4.403	0.13	99.0009
110\177	Zapolarnaya	41.58	0.036	19.344	4.503	7.11348	0.357	21.7352	4.954	0.061	99.6837
110\177	Zapolarnaya	41.065	0	20.038	3.956	6.85848	0.304	22.3635	4.2	0.036	98.821
110\177	Zapolarnaya	40.659	0.477	16.811	7.447	6.90744	0.323	21.0518	5.505	0.1	99.2812
110\207	Zapolarnaya	41.432	0.49	20.518	2.842	7.29096	0.299	20.75	4.418	0.034	98.074
110\207	Zapolarnaya	41.496	0.413	18.589	5.478	6.88908	0.349	20.7	4.589	0.072	98.5751
110\207	Zapolarnaya	41.081	0.612	18.439	5.195	7.13592	0.34	20.005	4.962	0.137	97.9069
110\207	Zapolarnaya	41.53	0.422	19.959	3.149	7.71222	0.285	20.249	4.425	0.058	97.7892
110\207	Zapolarnaya	41.677	0.023	18.902	5.804	6.65244	0.319	22.042	2.477	0.048	97.9444
110\207	Zapolarnaya	41.303	0.576	18.146	5.941	6.72486	0.355	19.226	6.45	0.07	98.7919
110\207	Zapolarnaya	41.989	0.983	20.271	1.11	9.73896	0.255	20.25	4.374	0.067	99.038
110\207	Zapolarnaya	41.652	0.06	20.771	3.572	6.90336	0.322	20.757	4.513	0.081	98.6314
110\207	Zapolarnaya	41.323	0.208	17.737	6.723	6.46374	0.313	20.753	4.389	0.07	97.9797
110\207	Zapolarnaya	42.051	0.788	21.126	0.476	9.7155	0.232	20.293	3.943	0.14	98.7645
110\207	Zapolarnaya	41.55	0.067	20.112	4.133	6.30054	0.309	22.053	3.319	0.062	97.9055
110\207	Zapolarnaya	41.598	0.365	20.621	2.734	7.6347	0.33	20.888	4.314	0.1	98.5847
110\207	Zapolarnaya	41.222	0.814	17.078	6.595	6.8493	0.315	20.262	5.329	0.139	98.6033
110\207	Zapolarnaya	41.55	1.034	20.435	1.251	9.55842	0.27	20.08	4.381	0.104	98.6634
110\237	Zapolarnaya	41.738	0.859	19.279	3.468	8.0529	0.345	20.233	4.721	0.144	98.8399
110\237	Zapolarnaya	41.617	0.508	18.598	5.437	6.7269	0.344	20.349	4.938	0.078	98.5959
110\237	Zapolarnaya	41.64	0.38	18.42	5.57	7.04	0.2	19.88	5.08	0.00	98.21
110\237	Zapolarnaya	40.99	0.346	16.648	8.27	6.72078	0.38	20.226	5.161	0.06	100.78
110\237	Zapolarnaya	41.514	0.078	19.831	4.362	6.56472	0.327	19.223	6.713	0.024	98.6367
110\237	Zapolarnaya	41.555	0.01	16.741	8.617	6.71466	0.375	22.419	2.048	0	98.4797
110\237	Zapolarnaya	41.135	0.362	18.15	5.956	7.10328	0.346	19.936	5.35	0.051	98.3893
110\237	Zapolarnaya	41.424	0.387	21.516	0.124	14.5799	0.317	17.15	3.464	0.569	99.5309
110\237	Zapolarnaya	41.705	1.046	20.281	0.989	9.5115	0.226	20.314	4.254	0.176	98.5025
110\237	Zapolarnaya	41.308	0.377	17.656	6.924	6.54024	0.366	21.101	3.961	0.07	98.3032
110\237	Zapolarnaya	42.105	0.897	20.437	1.039	9.16368	0.239	20.66	4.378	0.079	98.9977
110\87	Zapolarnaya	40.923	0.464	18.409	5.097	7.80504	0.319	21.2803	4.372	0.043	98.7123
110\87	Zapolarnaya	39.859	0.027	15.054	10.74	6.41172	0.339	22.1595	3.528	0.054	98.1722
110\87	Zapolarnaya	41.096	0.013	19.443	4.999	6.81462	0.349	23.3315	2.388	0.057	98.4911
110\87	Zapolarnaya	41.456	0.709	20.576	1.957	8.45172	0.272	21.6148	4.144	0.1	99.2805
110\87	Zapolarnaya	41.341	0.041	18.225	6.637	6.9207	0.346	22.5155	3.799	0.074	99.8992
110\87	Zapolarnaya	41.495	0.952	20.261	1.311	8.8077	0.246	21.8637	4.215	0.057	99.2084
110\87	Zapolarnaya	41.021	0.151	17.258	8.012	6.72486	0.333	21.9912	4.214	0.044	99.7491
110\87	Zapolarnaya	41.056	0.156	22.209	0.017	11.8993	0.171	14.433	9.945	0.07	99.9563
110\87	Zapolarnaya	41.465	0.028	19.636	4.468	6.94212	0.34	22.2625	3.802	0.012	98.9556
110\87	Zapolarnaya	41.063	0.293	19.038	4.543	7.84482	0.337	20.9794	4.869	0	98.9672
110\87	Zapolarnaya	41.792	0.469	20.764	2.606	7.37868	0.307	22.2564	4.193	0.098	99.8641
110\87	Zapolarnaya	41.21	0.343	20.275	3.333	6.37908	0.285	20.6173	6.334	0.087	98.8633
110\87	Zapolarnaya	41.331	0.81	20.858	0.204	8.01924	0.202	22.185	4.113	0.094	97.8162
110\87	Zapolarnaya	41.103	0.081	18.137	5.973	7.66734	0.336	20.9437	5.455	0.069	99.765
110\87	Zapolarnaya	41.237	0.431	19.228	4.782	7.3542	0.365	21.6577	4.603	0.028	99.6859
110\87	Zapolarnaya	41.006	0.693	18.018	5.823	6.78096	0.348	21.6658	4.959	0.114	99.4078
110\87	Zapolarnaya	40.633	0.615	16.047	8.308	7.39296	0.329	20.6224	5.418	0.124	99.4893
115-13\120	Zapolarnaya	41.443	0.754	20.798	0.51	10.9834	0.257	20.0308	4.126	0.09	98.9921
115-13\120	Zapolarnaya	41.758	0.839	20.735	0.737	8.96988	0.237	21.5016	4.236	0.069	99.0825
115-13\120	Zapolarnaya	40.386	0.158	13.309	12.76	7.01862	0.403	20.3235	4.902	0.04	99.3001
115-18\170	Zapolarnaya	41.324	0.766	15.977	8.53286	6.597	0.326	19.994	6.41	0.097	100.024
119\150	Zapolarnaya	41.764	0.411	19.1	5.037	7.242	0.384	20.415	4.708	0.088	99.149
119\150	Zapolarnaya	42.42	0.7	21.387	0.143	9.14328	0.196	19.869	4.805	0.084	98.7473
119\150	Zapolarnaya	42.081	0.957	19.596	2.389	8.058	0.248	20.516	4.724	0.106	98.675
119\150	Zapolarnaya	41.708	0.926	20.449	1.536	8.00496	0.221	20.396	4.469	0.097	97.807
119\150	Zapolarnaya	41.458	0.318	18.839	4.879	7.07472	0.304	20.339	5.063	0.109	98.3837
119\150	Zapolarnaya	42.004	0.381	21.053	2.46	7.76934	0.344	20.746	4.193	0.084	99.0343
119\150	Zapolarnaya	41.382	1.047	19.426	2.931	8.0631	0.236	20.575	4.7	0.075	98.4351
119\150	Zapolarnaya	41.165	0.606	18.629	4.857	7.3236	0.298	20.011	4.93	0.046	97.8656
119\150	Zapolarnaya	41.241	0.677	18.254	5.386	6.87684	0.304	20.534	4.919	0.118	98.3098
119\150	Zapolarnaya	41.143	0.958	18.513	3.868	8.12124	0.255	20.162	4.803	0.108	97.9312
119\150	Zapolarnaya	41.87	0.978	20.146	2.044	7.96008	0.267	20.595	4.561	0.071	98.4921
119\150	Zapolarnaya	41.418	0.074	17.381	7.227	6.84318	0.281	19.653	5.697	0.025	98.5992
119\150	Zapolarnaya	40.795	1.511	15.442	7.647	7.44906	0.33	19.251	6.109	0.156	98.6901
119\150	Zapolarnaya	39.587	0.995	12.897	10.966	8.03148	0.354	16.29	8.438	0.132	97.6905
119\170	Zapolarnaya	40.869	0.37	18.976	4.541	7.15836	0.349	20.55	4.62	0.085	97.5184
119\170	Zapolarnaya	41.566	0.491	19.522	3.792	7.8183	0.287	20.13	4.609	0.107	98.3223
119\170	Zapolarnaya	41.321	1.113	20.839	0.138	11.8381	0.301	18.938	4.106	0.058	98.6521
119\170	Zapolarnaya	40.761	0.119	17.506	7.109	7.06758	0.382	19.312	5.679	0.047	97.9826
119\170	Zapolarnaya	40.77	0.623	17.69	5.595	9.20448	0.319	18.275	5.59	0.198	98.2645
119\170	Zapolarnaya	41.679	0.5	20.357	3.187	7.31748	0.257	21.046	4.383	0.066	98.7925
119\170	Zapolarnaya	40.989	0.401	18.436	5.359	6.9411	0.28	20.036	5.044	0.048	97.5341
119\170	Zapolarnaya	41.766	0.442	20.471	3.515	6.96252	0.347	20.821	4.44	0.092	98.8565
119\170	Zapolarnaya	41.974	0.914	20.079	2.125	7.9356	0.224	20.704	4.47	0.11	98.5356
123\15	Zapolarnaya	40.557	0.34	14.63	10.928	6.0129	0.37	19.599	5.597	0.073	98.1069
123\15	Zapolarnaya	41.227	0.733	18.322	5.352	7.0329	0.295	20.447	4.748	0.115	98.2719
123\15	Zapolarnaya	41.276	0.324	17.931	6.639	6.84216	0.342	20.162	4.928	0.097	98.5412
123\15	Zapolarnaya	40.76	0.463	15.542	9.065	8.06208	0.414	19.551	4.551	0.054	98.4621
123\15	Zapolarnaya	41.572	0.94	20.649	0.897	9.26364	0.254	20.549	4.124	0.14	98.3886
123\15	Zapolarnaya	41.105	1.028	18.849	4.189	7.7061	0.313	20.259	4.825	0.137	98.4111
123\15	Zapolarnaya	41.929	0.091	20.076	4.645	6.24342	0.289	22.543	2.659	0.039	98.5144
130\37	Zapolarnaya	41.226	0.499	18.997	4.626	8.09574	0.333	18.242	6.41	0.063	98.4917
130\37	Zapolarnaya	41.506	0.995	20.418	1.526	9.59616	0.272	20.012	4.399	0.115	98.8392
130\37	Zapolarnaya	40.941	0.764	17.827	5.831	6.94008	0.314	19.805	5.541	0.068	98.0311
130\37	Zapolarnaya	41.511	0.747	20.533	2.436	7.2012	0.291	20.876	4.196	0.141	97.9322
130\37	Zapolarnaya	41.843	0.887	20.583	1.63	8.04576	0.247	20.759	4.348	0.113	98.4558
130\37	Zapolarnaya	41.667	0.985	20.586	1.034	9.84912	0.244	19.743	4.152	0.086	98.3461
130\37	Zapolarnaya	41.821	0.916	21.056	1.114	7.8387	0.25	21.04	4.29	0.086	98.4117
130\37	Zapolarnaya	41.717	0.87	20.391	1.527	8.2722	0.251	20.883	4.186	0.05	98.1472
130\37	Zapolarnaya	41.937	0.062	20.448	4.414	5.6253	0.269	22.389	3.287	0.051	98.4823
109\185	Zapolarnaya	41.481	0.431	19.893	3.554	7.0176	0.297	22.2013	4.313	0.057	99.2449
109\185	Zapolarnaya	40.377	0.632	19.988	0.945	13.6456	0.393	18.5018	4.171	0.127	98.7803
109\185	Zapolarnaya	41.561	1.002	20.124	0.993	10.0419	0.274	21.0191	4.297	0.098	99.41
109\185	Zapolarnaya	42.022	0.126	20.19	3.762	7.17978	0.306	22.287	4.71	0.033	100.616
109\185	Zapolarnaya	41.766	0.265	19.995	4.157	6.57798	0.31	22.6511	4.067	0.081	99.8701
109\185	Zapolarnaya	41.51	1.131	20.111	1.094	9.81036	0.224	21.37	4.487	0.071	99.8084
109\185	Zapolarnaya	41.572	0.282	20.592	2.904	7.39806	0.309	22.0453	4.409	0.045	99.5563
109\185	Zapolarnaya	41.062	1.128	17.273	5.914	6.94314	0.284	21.4863	5.348	0.09	99.5284
109\185	Zapolarnaya	41.164	0.12	20.103	3.435	8.97702	0.314	20.8886	4.455	0	99.4566
109\185	Zapolarnaya	41.713	0.531	19.695	3.872	7.51638	0.288	21.9035	4.777	0.064	100.36
109\185	Zapolarnaya	41.198	0.079	16.746	8.844	6.75444	0.371	22.9276	2.893	0.078	99.891
109\185	Zapolarnaya	40.293	1.375	15.304	7.633	8.7159	0.332	19.432	6.76	0.033	99.8779
109\185	Zapolarnaya	40.827	0.6	18.074	5.904	6.8748	0.321	21.2813	4.725	0.092	98.6991
99	Zimnaya	41.736	0.249	18.955	5.623	7.255	0.322	20.629	5.413	0.02	100.214
100	Zimnaya	42.369	0.076	21.77	3.01	7.626	0.417	22.34	2.998	0.03	100.643
101	Zimnaya	40.921	0.36	18.152	7.099	6.994	0.315	20.463	5.383	0.042	99.729
102	Zimnaya	41.762	0	22.795	1.935	6.946	0.31	23.327	2.633	0.045	99.753
103	Zimnaya	42.392	0.269	19.418	5.512	6.222	0.314	21.024	5.722	0.074	100.947
104	Zimnaya	42.477	0.006	22.346	2.047	7.1	0.368	23.461	1.827	0.021	99.658
105	Zimnaya	41.768	0	16.672	9.3	6.632	0.378	23.418	1.496	0.028	99.692
106	Zimnaya	41.875	0.031	17.863	8.15	6.374	0.29	25.623	0.323	0.027	100.556
107	Zimnaya	41.639	0	17.412	8.788	6.663	0.376	23.857	1.009	0	99.744
108	Zimnaya	41.962	0.007	18.649	6.987	6.477	0.328	23.528	2.033	0	99.993
109	Zimnaya	41.768	0.539	17.242	7.117	7.194	0.345	19.621	6.274	0.06	100.16
110	Zimnaya	42.354	0.593	21.555	1.665	6.952	0.314	21.486	5.381	0.056	100.361
111	Zimnaya	42.374	0.017	22.244	2.448	7.218	0.332	22.949	2.814	0.013	100.409
112	Zimnaya	40.623	0.034	17.463	8.181	7.14	0.397	21.806	3.699	0.042	99.403
113	Zimnaya	41.929	0.284	18.699	5.969	6.79	0.333	19.67	6.68	0.084	100.438
114	Zimnaya	42.35	0.039	22.639	1.814	6.945	0.276	22.968	2.717	0.021	99.77
115	Zimnaya	42.186	0.016	22.345	2.168	7.219	0.275	23.221	2.752	0	100.184
116	Zimnaya	41.557	0.183	16.926	8.798	6.965	0.324	20.406	5.108	0.029	100.296
117	Zimnaya	42.062	0	21.593	3.112	7.25	0.445	21.148	4.396	0	100.006
118	Zimnaya	42.315	0.001	22.727	1.815	7.015	0.343	23.136	2.666	0	100.018
119	Zimnaya	42.04	0.027	21.48	3.027	7.69	0.421	21.228	4.003	0.049	99.986
120	Zimnaya	41.251	0.227	17.002	8.698	6.755	0.368	20.579	5.029	0.051	99.962
121	Zimnaya	42.726	0.003	20.439	4.382	5.879	0.248	24.103	2.004	0.045	99.829
122	Zimnaya	42.162	0.029	21.713	2.736	7.232	0.432	22.136	3.311	0.013	99.764
123	Zimnaya	41.974	0.023	21.944	2.082	7.378	0.388	22.316	2.958	0.008	99.075
124	Zimnaya	41.291	0.051	17.287	8.073	6.284	0.316	21.423	4.879	0.053	99.657
125	Zimnaya	42.097	0.148	19.774	4.435	7.83	0.371	20.42	5.609	0.006	100.699
126	Zimnaya	42.461	0.025	20.82	3.664	5.469	0.242	24.721	1.817	0.049	99.268
127	Zimnaya	42.033	0.685	18.342	5.061	6.951	0.355	21.414	4.906	0.135	99.882
128	Zimnaya	42.736	0.03	21.142	3.78	6.14	0.266	23.544	2.971	0.04	100.651
129	Zimnaya	42.044	0.918	20.138	1.828	8.967	0.277	20.786	4.541	0.055	99.58
130	Zimnaya	41.925	0.646	19.08	4.797	6.849	0.393	20.212	6.215	0.083	100.201
131	Zimnaya	41.798	0.037	21.404	3.135	7.618	0.41	22.174	3.343	0	99.939
133	Zimnaya	42.327	0	22.289	2.252	6.97	0.384	21.213	4.535	0.019	99.992
134	Zimnaya	41.962	0	22.452	2.423	7.16	0.375	22.901	3.236	0.024	100.554
135	Zimnaya	41.827	0.01	19.822	5.502	7.112	0.415	22.105	3.601	0	100.407
136	Zimnaya	42.085	0	22.648	2.119	6.855	0.311	24.028	1.784	0.052	99.882
137	Zimnaya	41.523	0.031	16.423	9.569	6.94	0.392	23.027	2.265	0.04	100.21
138	Zimnaya	42.102	0.014	22.074	2.088	7.611	0.356	21.768	3.405	0.013	99.431
139	Zimnaya	41.223	1.067	18.725	3.545	8.818	0.317	20.242	5.267	0.048	99.252
140	Zimnaya	42.183	0.007	22.952	1.702	6.904	0.29	23.234	2.58	0.05	99.902
141	Zimnaya	42.164	0.013	21.87	2.708	7.09	0.362	22.281	3.634	0.005	100.127
142	Zimnaya	41.649	0.015	21.841	2.79	7.338	0.432	21.868	3.92	0.013	99.873
143	Zimnaya	42.252	0.016	22.385	2.769	7.613	0.432	23.124	2.163	0.027	100.781
144	Zimnaya	41.841	0.787	19.076	4.094	8.082	0.364	20.809	4.947	0.072	100.072
145	Zimnaya	42.109	0.017	22.37	2.41	7.28	0.336	22.828	2.848	0.032	100.23
96	Zimnaya	42.323	0.174	19.57	3.712	6.998	0.258	21.583	5.152	0.008	99.778
97	Zimnaya	42.29	0.015	22.028	2.483	7.061	0.362	22.411	2.839	0.011	99.522
98	Zimnaya	41.092	1.022	19.264	3.346	8.311	0.295	20.734	5.061	0.05	99.195
5D\10	Deimos	42.058	0	23.621	1.526	6.789	0.287	24.073	1.295	0.075	99.724
5D\10	Deimos	41.947	0.179	18.501	6.709	7.035	0.367	20.903	4.295	0.049	99.985
5D\10	Deimos	41.94	1.004	20.754	1.264	9.773	0.3	20.256	4.529	0.171	99.991
5D\10	Deimos	41.714	1.111	19.096	3.338	9.357	0.331	19.871	5.014	0.109	99.941
5D\10	Deimos	41.664	0.062	17.793	8.247	6.777	0.37	21.071	4	0.005	99.989
5D\10	Deimos	41.769	0.023	22.243	2.37	8.055	0.553	20.078	4.861	0.029	99.981
5D\10	Deimos	40.822	0.837	15.082	9.707	6.746	0.368	18.261	7.88	0.082	99.785
5D\10	Deimos	39.089	0.032	21.246	0.03	27.022	0.97	6.171	6.376	0.027	100.963
5D\10	Deimos	42.454	0	21.599	3.677	7.177	0.365	22.911	1.803	0.077	100.063
5D\10	Deimos	41.343	0.817	21.728	0.906	11.046	0.335	19.366	4.09	0.119	99.75
5D\10	Deimos	41.718	0.014	21.093	3.721	7.73	0.4	21.35	3.591	0.026	99.643
5D\10	Deimos	40.449	0.155	22.303	0.815	15.186	0.367	15.41	5.014	0	99.699
5D\10	Deimos	41.925	0.017	21.838	2.854	7.81	0.449	20.972	3.866	0.003	99.734
5D\10	Deimos	42.079	0.613	20.531	2.883	8.105	0.261	21.122	4.382	0.048	100.024
5D\10	Deimos	41.614	0	21.558	3.718	7.468	0.423	22.247	2.466	0.05	99.544
5D\10	Deimos	42.32	0.039	22.741	1.922	7.356	0.367	23.171	2.039	0.013	99.968
5D\10	Deimos	41.911	0.704	21.713	1.887	7.625	0.274	21.474	4.026	0.028	99.642
5D\10	Deimos	41.394	0.133	17.14	8.532	6.197	0.306	21.855	3.689	0.051	99.297
5D\10	Deimos	42.105	0	21.957	2.464	7.495	0.379	21.292	3.756	0.041	99.489
5D\10	Deimos	40.982	0.122	22.538	0.618	15.611	0.401	15.479	5.083	0.046	100.88
5D\10	Deimos	41.141	0.826	17.136	6.776	6.568	0.354	19.065	7.111	0.096	99.073
5D\10	Deimos	41.091	0.12	17.194	8.662	6.809	0.324	22.149	2.899	0.038	99.286
5D\30 ïð.4	Deimos	42.095	0.518	20.881	3.091	7.567	0.277	20.935	4.426	0.097	99.887
5D\30 ïð.4	Deimos	41.425	0.18	19.957	4.887	7.195	0.332	20.844	4.819	0.032	99.671
5D\30 ïð.4	Deimos	38.592	0.16	21.871	0	25.872	0.64	7.395	6.395	0.064	100.989
5D\30 ïð.4	Deimos	41.247	0.515	19.588	4.805	7.14	0.311	21.193	4.788	0.064	99.651
5D-8\60	Deimos	39.73	0.06	21.812	0.021	18.9404	0.177	8.873	10.119	0.059	99.7914
5D-8\60	Deimos	39.272	0.098	21.695	0.09	25.2838	0.586	7.389	6.55	0.1	101.064
5D-8\60	Deimos	42.068	0.333	20.507	2.833	7.4817	0.323	21.198	4.083	0.081	98.9077
5D-8\60	Deimos	41.752	0.461	19.535	4.322	7.68162	0.352	20.659	4.383	0.096	99.2416
5D-8\60	Deimos	41.38	0.45	21.09	2.6	7.39	0.57	22.88	4.97	0.00	101.33
5D-8\60	Deimos	41.657	0.446	20.584	2.697	7.51128	0.3	20.831	4.214	0.071	98.3113
5D-8\60	Deimos	39.556	0.506	21.493	0.023	18.6691	0.335	7.071	12.206	0.144	100.003
6D\165	Deimos	42.165	0.03	21.609	3.057	7.30932	0.442	21.279	3.859	0.06	99.8103
6D\165	Deimos	41.963	0.442	19.947	4.226	8.0172	0.396	20.009	4.639	0.115	99.7542
6D\165	Deimos	38.988	0.06	21.691	0.045	25.1134	0.535	7.532	6.728	0.056	100.748
6D\165	Deimos	42.155	0.037	22.229	2.307	7.60716	0.406	22.094	2.665	0.041	99.5412
6D\165	Deimos	39.389	0.06	22.02	0.011	20.857	0.297	7.31	10.715	0	100.659
6D\165	Deimos	42.04	0.15	23.013	0.825	9.95724	0.37	19.298	4.033	0.032	99.7182
6D\165	Deimos	42.241	0.684	20.038	3.545	6.60858	0.34	20.441	5.133	0.107	99.1376
6D\165	Deimos	42.677	0.044	23.111	1.555	6.86154	0.33	22.995	1.852	0.038	99.4635
6D\165	Deimos	41.433	0.047	16.667	9.264	6.80442	0.344	21.817	2.72	0.052	99.1484
6D-20\185	Deimos	41.99	0.506	19.657	4.154	7.58982	0.293	20.016	5.125	0.072	99.4028
6D-20\185	Deimos	40.563	0.077	22.771	0.071	14.7604	0.237	11.779	9.508	0.099	99.8654
6D-20\185	Deimos	42.344	0.006	22.069	2.341	7.3236	0.37	22.646	1.809	0.028	98.9366
6D-20\185	Deimos	41.295	0.373	19.551	4.323	8.18754	0.328	20.213	4.412	0.097	98.7795
7D\40 ïð.5	Deimos	42.257	0.264	21.081	3.29	6.863	0.281	21.774	4.095	0.031	99.936
7D\40 ïð.5	Deimos	41.672	0.9	20.644	2.005	7.844	0.256	21.21	4.352	0.154	99.037
7D\40 ïð.5	Deimos	42.139	0.511	19.85	4.103	7.237	0.288	21.095	4.635	0.053	99.911
7D\40 ïð.5	Deimos	42.276	0	22.271	2.81	7.346	0.387	23.833	1.033	0.094	100.05
7D\50 ïð.6	Deimos	40.543	0.026	22.843	2.459	7.532	0.391	22.069	2.666	0.036	98.565
7D\50 ïð.6	Deimos	41.712	0.023	21.911	3.378	7.58	0.421	22.554	2.298	0	99.877
7D\50 ïð.6	Deimos	42.212	0.371	22.074	1.87	6.891	0.316	21.816	4.034	0.095	99.679
7D\50 ïð.6	Deimos	41.686	0.964	21.224	0.019	13.51	0.414	18.674	4.259	0.215	100.965
7D\50 ïð.6	Deimos	42.668	0.007	22.506	2.291	6.915	0.326	24.269	0.876	0.033	99.891
7D\50 ïð.6	Deimos	41.314	0.947	20.886	1.502	8.979	0.209	20.793	4.457	0.103	99.19
7D\50 ïð.6	Deimos	41.748	0	22.582	2.387	7.059	0.358	21.607	4.11	0.044	99.895
7D\50 ïð.6	Deimos	41.282	0.981	20.691	1.386	9.241	0.225	20.662	4.419	0.08	98.967
7D\50 ïð.6	Deimos	42.148	0	22.431	2.891	7.259	0.361	23.444	1.155	0	99.689
7D\50 ïð.6	Deimos	42.451	0.01	22.273	2.785	6.924	0.332	24.353	0.865	0.056	100.049
7D\50 ïð.6	Deimos	41.916	0.05	21.28	4.043	6.351	0.303	22.338	3.652	0.067	98.28
7D\50 ïð.6	Deimos	42.135	0	21.79	3.392	7.639	0.438	22.529	1.965	0.07	99.958
7D\50 ïð.6	Deimos	38.381	0.15	21.301	0.067	27.006	0.953	6.591	6.145	0.027	100.621
7D-1	Deimos	41.877	0.016	21.237	3.795	7.317	0.405	21.611	3.133	0.016	99.407
7D-1	Deimos	41.277	0.265	19.105	5.862	7.971	0.402	19.871	5.129	0.084	99.966
7D-1	Deimos	41.829	0.823	20.104	3.031	8.189	0.324	20.325	4.945	0.04	99.61
7D-1	Deimos	40.933	0.304	18.816	5.667	7.834	0.406	20.08	4.962	0.043	99.045
7D-1	Deimos	42.312	0.897	20.748	1.024	9.404	0.207	20.758	4.324	0.13	99.804
7D-1	Deimos	41.314	0.361	17.282	6.725	7.097	0.294	19.942	5.56	0.046	98.621
7D-1	Deimos	41.026	0.246	17.256	7.934	5.876	0.31	19.258	6.753	0.071	98.73
7D-1	Deimos	41.611	0.064	21.073	3.672	7.555	0.443	21.927	2.999	0	99.344
7D-1	Deimos	41.895	0.061	21.66	3.118	7.389	0.408	21.982	2.832	0.029	99.374
7D-1\4	Deimos	42.227	0.022	21.568	3.173	6.872	0.362	20.554	4.525	0	99.303
7D-12\110	Deimos	41.887	0.189	20.424	4.169	6.54432	0.298	21.258	4.369	0.076	99.2143
7D-12\110	Deimos	41.95	0.23	19.993	4.613	6.80952	0.359	21.134	4.741	0.058	99.8875
7D-12\110	Deimos	41.253	1.053	18.701	3.96	8.35992	0.293	19.659	5.296	0.1	98.6749
7D-12\110	Deimos	42.184	0	21.696	2.822	7.15938	0.37	23.085	1.338	0	98.6544
7D-12\110	Deimos	41.044	0.085	17.977	7.214	6.71364	0.378	20.145	4.881	0.024	98.4616
7D-12\110	Deimos	41.506	1.117	20.633	0.767	10.66	0.264	19.599	4.322	0.135	99.003
7D-12\110	Deimos	41.822	0.822	21.291	1.646	8.24772	0.312	20.764	4.458	0.11	99.4727
7D-12\110	Deimos	41.276	0.128	22.662	0.068	15.5632	0.448	16.512	3.849	0.086	100.592
7D-12\110	Deimos	41.872	1.141	20.984	0.617	11.0497	0.291	19.428	4.33	0.163	99.8757
7D-12\110	Deimos	42.422	0.585	20.837	2.671	7.51128	0.304	21.458	4.453	0.099	100.34
7D-12\110	Deimos	42.186	0	22.002	2.791	7.20426	0.361	22.769	2.239	0.031	99.5833
7D-12\110	Deimos	42.272	0.801	20.238	1.954	7.77954	0.233	21.226	4.518	0.146	99.1675
7D-12\110	Deimos	41.766	0.089	17.165	8.757	6.29442	0.349	22.825	1.836	0.062	99.1434
7D-12\110	Deimos	42.774	0.001	21.965	2.617	7.34094	0.363	23.204	1.347	0.046	99.6579
7D-12\110	Deimos	41.998	0.691	20.717	1.814	7.77444	0.265	21.297	4.293	0.12	98.9694
7D-12\110	Deimos	39.103	0.133	21.807	0.068	23.613	0.484	8.237	6.769	0.065	100.279
7D-12\110	Deimos	39.168	0.091	21.529	0.063	23.6344	0.474	8.524	6.698	0.029	100.21
7D-12\110	Deimos	42.267	0.666	21.381	1.582	7.9101	0.27	20.715	4.67	0.047	99.5081
7D-12\110	Deimos	42.003	0.63	20.732	2.662	9.48396	0.333	19.164	5.271	0.046	100.325
7D-12\110	Deimos	41.578	0.143	18.613	6.229	6.64938	0.325	20.731	4.631	0.072	98.9714
7D-12\110	Deimos	43.066	0	22.813	1.696	7.0125	0.331	23.207	1.75	0.05	99.9255
7D-12\110	Deimos	41.414	0.139	15.951	9.966	6.79524	0.352	22.404	2.591	0.033	99.6452
7D-12\110	Deimos	42.055	0.039	20.01	4.828	8.4252	0.416	19.764	4.853	0.011	100.401
7D-12\110	Deimos	42.126	1.034	21.138	0.531	10.5152	0.283	20.112	4.375	0.132	100.246
7D-12\110	Deimos	41.939	0.779	21.321	1.579	9.06678	0.299	20.52	4.216	0.133	99.8528
7D-12\110	Deimos	41.758	0.437	19.572	4.619	6.92172	0.324	20.959	4.757	0.077	99.4247
7D-12\110	Deimos	41.911	1.248	20.645	0.836	10.4162	0.252	19.66	4.609	0.162	99.7392
7D-12\110	Deimos	42.2	0.81	20.959	1.767	8.30076	0.323	20.866	4.457	0.105	99.7878
7D-12\110	Deimos	41.784	0.007	20.399	4.675	8.0478	0.424	19.055	5.728	0.019	100.139
7D-12\110	Deimos	41.743	0.023	19.961	4.781	8.25384	0.459	19.094	5.675	0.092	100.082
7D-13\120	Deimos	41.564	1.074	20.973	0.503	11.14	0.323	19.41	4.628	0.057	99.672
7D-13\120	Deimos	41.3	0.553	22.163	0.097	11.167	0.229	16.484	7.87	0.151	100.014
7D-13\120	Deimos	42.132	0.432	21.3	2.35	6.997	0.317	21.537	4.009	0.064	99.138
7D-13\120	Deimos	40.437	0.022	13.922	12.393	7.002	0.414	21.418	3.181	0	98.789
7D-13\120	Deimos	42.033	0.241	21.568	2.392	6.877	0.313	21.736	4.269	0.054	99.483
7D-13\120	Deimos	42.236	0.059	21.486	3.048	7.176	0.342	22.177	2.728	0	99.252
7D-13\120	Deimos	42.159	0.964	19.94	2.555	8.063	0.268	20.743	4.458	0.074	99.224
7D-13\120	Deimos	41.884	0.534	19.472	3.978	7.506	0.295	20.624	4.871	0.085	99.249
7D-13\120	Deimos	42.233	0.166	20.477	4.084	6.575	0.342	21.43	4.612	0.029	99.948
7D-13\120	Deimos	41.99	0.992	19.089	3.311	8.677	0.279	20.54	4.378	0.089	99.345
7D-13\120	Deimos	41.811	0	21.457	2.915	7.812	0.435	21.294	3.16	0.026	98.91
7D-6\50	Deimos	40.702	0.598	17.35	5.72	12.7255	0.526	15.696	6.503	0.103	99.9235
11D\75	Deimos	42.409	0.019	21.292	3.687	7.25832	0.374	21.722	2.96	0.042	99.7633
11D\75	Deimos	42.378	0	22.582	2.021	7.1655	0.344	23.541	1.5	0.074	99.6055
11D\75	Deimos	42.041	0.363	20.49	3.132	7.45008	0.28	20.649	4.944	0.066	99.4151
11D\75	Deimos	42.16	0.309	20.126	3.28	7.35726	0.261	20.594	4.884	0.108	99.0793
11D\75	Deimos	42.251	0.016	21.441	3.298	7.63878	0.376	21.761	2.749	0.029	99.5598
11D\75	Deimos	42.791	0	22.076	2.785	7.31748	0.381	24.023	0.749	0.043	100.165
11D\75	Deimos	42.695	0	22.43	2.173	7.25628	0.419	22.91	1.523	0.015	99.4213
11D\75	Deimos	42.748	0.007	22.298	2.54	5.54064	0.293	23.845	1.821	0.017	99.1096
11D\75	Deimos	37.646	0.04	0.004	0	4.67058	0.203	23.914	32.779	0.098	99.3546
11D\75	Deimos	39.261	0.033	21.795	0.011	25.4255	0.628	7.581	5.702	0.047	100.484
11D\75	Deimos	40.957	0.464	14.632	10.959	6.64938	0.379	19.586	5.797	0.11	99.5334
99	Deimos	41.736	0.249	18.955	5.623	7.255	0.322	20.629	5.413	0.02	100.214
100	Deimos	42.369	0.076	21.77	3.01	7.626	0.417	22.34	2.998	0.03	100.643
101	Deimos	40.921	0.36	18.152	7.099	6.994	0.315	20.463	5.383	0.042	99.729
102	Deimos	41.762	0	22.795	1.935	6.946	0.31	23.327	2.633	0.045	99.753
103	Deimos	42.392	0.269	19.418	5.512	6.222	0.314	21.024	5.722	0.074	100.947
104	Deimos	42.477	0.006	22.346	2.047	7.1	0.368	23.461	1.827	0.021	99.658
105	Deimos	41.768	0	16.672	9.3	6.632	0.378	23.418	1.496	0.028	99.692
106	Deimos	41.875	0.031	17.863	8.15	6.374	0.29	25.623	0.323	0.027	100.556
107	Deimos	41.639	0	17.412	8.788	6.663	0.376	23.857	1.009	0	99.744
108	Deimos	41.962	0.007	18.649	6.987	6.477	0.328	23.528	2.033	0	99.993
109	Deimos	41.768	0.539	17.242	7.117	7.194	0.345	19.621	6.274	0.06	100.16
110	Deimos	42.354	0.593	21.555	1.665	6.952	0.314	21.486	5.381	0.056	100.361
111	Deimos	42.374	0.017	22.244	2.448	7.218	0.332	22.949	2.814	0.013	100.409
112	Deimos	40.623	0.034	17.463	8.181	7.14	0.397	21.806	3.699	0.042	99.403
113	Deimos	41.929	0.284	18.699	5.969	6.79	0.333	19.67	6.68	0.084	100.438
114	Deimos	42.35	0.039	22.639	1.814	6.945	0.276	22.968	2.717	0.021	99.77
115	Deimos	42.186	0.016	22.345	2.168	7.219	0.275	23.221	2.752	0	100.184
116	Deimos	41.557	0.183	16.926	8.798	6.965	0.324	20.406	5.108	0.029	100.296
117	Deimos	42.062	0	21.593	3.112	7.25	0.445	21.148	4.396	0	100.006
118	Deimos	42.315	0.001	22.727	1.815	7.015	0.343	23.136	2.666	0	100.018
119	Deimos	42.04	0.027	21.48	3.027	7.69	0.421	21.228	4.003	0.049	99.986
120	Deimos	41.251	0.227	17.002	8.698	6.755	0.368	20.579	5.029	0.051	99.962
121	Deimos	42.726	0.003	20.439	4.382	5.879	0.248	24.103	2.004	0.045	99.829
122	Deimos	42.162	0.029	21.713	2.736	7.232	0.432	22.136	3.311	0.013	99.764
123	Deimos	41.974	0.023	21.944	2.082	7.378	0.388	22.316	2.958	0.008	99.075
124	Deimos	41.291	0.051	17.287	8.073	6.284	0.316	21.423	4.879	0.053	99.657
125	Deimos	42.097	0.148	19.774	4.435	7.83	0.371	20.42	5.609	0.006	100.699
126	Deimos	42.461	0.025	20.82	3.664	5.469	0.242	24.721	1.817	0.049	99.268
127	Deimos	42.033	0.685	18.342	5.061	6.951	0.355	21.414	4.906	0.135	99.882
128	Deimos	42.736	0.03	21.142	3.78	6.14	0.266	23.544	2.971	0.04	100.651
129	Deimos	42.044	0.918	20.138	1.828	8.967	0.277	20.786	4.541	0.055	99.58
130	Deimos	41.925	0.646	19.08	4.797	6.849	0.393	20.212	6.215	0.083	100.201
131	Deimos	41.798	0.037	21.404	3.135	7.618	0.41	22.174	3.343	0	99.939
133	Deimos	42.327	0	22.289	2.252	6.97	0.384	21.213	4.535	0.019	99.992
134	Deimos	41.962	0	22.452	2.423	7.16	0.375	22.901	3.236	0.024	100.554
135	Deimos	41.827	0.01	19.822	5.502	7.112	0.415	22.105	3.601	0	100.407
136	Deimos	42.085	0	22.648	2.119	6.855	0.311	24.028	1.784	0.052	99.882
137	Deimos	41.523	0.031	16.423	9.569	6.94	0.392	23.027	2.265	0.04	100.21
138	Deimos	42.102	0.014	22.074	2.088	7.611	0.356	21.768	3.405	0.013	99.431
139	Deimos	41.223	1.067	18.725	3.545	8.818	0.317	20.242	5.267	0.048	99.252
140	Deimos	42.183	0.007	22.952	1.702	6.904	0.29	23.234	2.58	0.05	99.902
141	Deimos	42.164	0.013	21.87	2.708	7.09	0.362	22.281	3.634	0.005	100.127
142	Deimos	41.649	0.015	21.841	2.79	7.338	0.432	21.868	3.92	0.013	99.873
143	Deimos	42.252	0.016	22.385	2.769	7.613	0.432	23.124	2.163	0.027	100.781
144	Deimos	41.841	0.787	19.076	4.094	8.082	0.364	20.809	4.947	0.072	100.072
145	Deimos	42.109	0.017	22.37	2.41	7.28	0.336	22.828	2.848	0.032	100.23
96	Deimos	42.323	0.174	19.57	3.712	6.998	0.258	21.583	5.152	0.008	99.778
97	Deimos	42.29	0.015	22.028	2.483	7.061	0.362	22.411	2.839	0.011	99.522
98	Deimos	41.092	1.022	19.264	3.346	8.311	0.295	20.734	5.061	0.05	99.195
51	Poiskovaya	39.777	0.422	19.336	3.745	7.423	0.278	20.034	4.434	0.095	95.591
58	Poiskovaya	39.828	0.651	20.679	0.03	18.25	0.401	11.548	7.433	0.263	99.136
44	Poiskovaya	40.544	0.649	17.468	6.398	8.126	0.357	18.594	5.976	0.07	98.205
128	Poiskovaya	40.553	1.112	18.029	4.104	10.111	0.372	18.485	5.373	0.088	98.234
94	Poiskovaya	40.727	1.11	17.116	6.122	8.024	0.367	20.125	5.518	0.13	99.293
92	Poiskovaya	40.74	1.044	19.252	3.132	9.351	0.314	19.744	4.75	0.1	98.437
48	Poiskovaya	40.768	0.33	19.515	2.349	7.535	0.316	20.601	4.448	0.283	96.168
120	Poiskovaya	40.814	0.496	17.402	6.664	8.331	0.331	19.106	5.741	0.061	98.968
66	Poiskovaya	40.917	0.351	18.646	5.486	7.146	0.338	20.858	4.673	0.051	98.486
23	Poiskovaya	40.937	0.671	17.963	5.464	9.204	0.371	18.733	5.215	0.102	98.66
136	Poiskovaya	40.937	0.1	16.745	8.691	6.309	0.351	20.05	5.589	0.035	98.824
47	Poiskovaya	40.941	0.184	17.261	7.638	7.295	0.408	19.546	6.072	0.035	99.38
31	Poiskovaya	40.95	0.776	21.002	0.093	16.052	0.352	14.405	6.336	0.204	100.18
67	Poiskovaya	40.966	0.148	15.638	9.71	6.748	0.349	20.546	5.183	0.073	99.366
11	Poiskovaya	40.998	0.528	18.546	5.485	7.578	0.34	19.72	5.206	0.077	98.486
131	Poiskovaya	41.026	0.68	21.752	0.119	13.375	0.257	13.117	9.742	0.114	100.182
86	Poiskovaya	41.058	0.164	19.362	4.587	6.704	0.305	20.947	4.213	0.055	97.398
88	Poiskovaya	41.09	1.115	20.708	0.18	12.337	0.278	19.002	4.366	0.13	99.206
133	Poiskovaya	41.142	0.546	18.789	4.989	7.559	0.346	20.329	5.327	0.139	99.174
134	Poiskovaya	41.15	0.692	18.123	5.758	7.694	0.356	20.532	4.657	0.071	99.04
83	Poiskovaya	41.164	0.316	21.84	0.754	11.016	0.402	19.182	4.256	0.068	99.017
55	Poiskovaya	41.169	0.243	18.776	5.397	7.456	0.376	20.139	4.889	0.048	98.509
54	Poiskovaya	41.193	0.457	19.408	4.611	7.693	0.341	19.947	4.78	0.124	98.554
7	Poiskovaya	41.207	0.355	17.937	5.881	7.062	0.29	20.213	5.103	0.045	98.107
77	Poiskovaya	41.244	0.508	19.482	4.346	6.635	0.324	19.523	6.725	0.092	98.905
19	Poiskovaya	41.254	1.107	20.531	0.587	11.344	0.32	19.361	4.415	0.112	99.031
17	Poiskovaya	41.263	0.474	19.426	4.474	7.151	0.339	20.721	4.796	0.078	98.754
99	Poiskovaya	41.267	0.089	18.633	5.668	6.617	0.325	20.768	5.464	0.022	98.853
100	Poiskovaya	41.267	1.038	20.893	0.185	11.881	0.345	19.231	4.331	0.19	99.373
95	Poiskovaya	41.283	0.439	19.578	4.215	7.101	0.374	20.826	4.55	0.1	98.501
140	Poiskovaya	41.287	1.093	18.601	3.787	8.338	0.355	19.693	5.445	0.068	98.668
129	Poiskovaya	41.29	0.539	17.558	6.438	7.588	0.303	20.17	5.583	0.092	99.561
43	Poiskovaya	41.295	0.947	20.286	1.816	8.792	0.236	20.612	4.397	0.112	98.529
78	Poiskovaya	41.307	0.454	18.748	5.311	6.827	0.367	21.117	4.591	0.117	98.856
143	Poiskovaya	41.311	0.904	20.83	0.05	13.751	0.373	18.022	4.266	0.109	99.616
91	Poiskovaya	41.331	0.035	19.699	4.159	7.52	0.331	20.101	5.048	0.042	98.281
119	Poiskovaya	41.332	0.84	21.03	0.03	13.377	0.339	18.356	3.972	0.185	99.461
93	Poiskovaya	41.337	0.19	18.496	5.802	7.029	0.376	20.257	4.687	0.059	98.247
27	Poiskovaya	41.34	0.444	20.057	3.137	7.716	0.289	21.353	4.593	0.1	99.029
79	Poiskovaya	41.372	0.092	18.318	6.712	6.681	0.336	22.255	2.469	0.067	98.309
18	Poiskovaya	41.382	0.754	19.685	3.486	7.875	0.278	20.908	4.412	0.126	98.906
76	Poiskovaya	41.385	0.693	17.968	6.146	6.865	0.302	20.652	5.136	0.048	99.202
111	Poiskovaya	41.412	0.013	19.597	5.336	7.356	0.419	21.502	3.552	0.028	99.232
106	Poiskovaya	41.418	0.148	16.147	9.136	6.364	0.314	21.314	4.495	0.012	99.368
25	Poiskovaya	41.429	0.977	19.496	2.457	8.169	0.306	21.155	4.86	0.123	98.986
15	Poiskovaya	41.449	0.428	18.899	4.859	6.869	0.275	20.856	4.905	0.086	98.649
68	Poiskovaya	41.451	0.238	16.88	7.968	6.817	0.359	20.766	5.32	0.049	99.864
42	Poiskovaya	41.468	0.81	20.491	1.851	8.188	0.28	20.909	4.49	0.064	98.551
73	Poiskovaya	41.475	1.054	19.994	1.288	9.07	0.267	20.618	4.554	0.12	98.474
116	Poiskovaya	41.476	0.402	20.371	3.017	9.472	0.362	20.092	4.346	0.063	99.644
112	Poiskovaya	41.485	0.975	20.435	0.924	9.405	0.265	20.803	4.27	0.139	98.709
130	Poiskovaya	41.492	0.317	20.635	3.256	6.744	0.339	21.788	4.309	0.025	98.905
64	Poiskovaya	41.5	0.934	17.796	4.845	7.693	0.321	20.444	5.365	0.102	99.03
122	Poiskovaya	41.502	1.089	20.546	0.851	10.219	0.256	20.011	4.396	0.105	98.982
34	Poiskovaya	41.506	0.953	18.919	3.481	9.069	0.297	19.848	4.826	0.071	98.988
139	Poiskovaya	41.508	0.029	18.941	5.746	7.337	0.366	19.858	5.577	0.031	99.41
144	Poiskovaya	41.512	0.87	18.6	4.111	7.511	0.255	21.035	4.734	0.059	98.732
127	Poiskovaya	41.521	0.347	20.218	3.407	9.197	0.303	19.631	4.514	0.125	99.263
38	Poiskovaya	41.535	1.052	19.217	2.685	9.712	0.332	19.796	4.934	0.137	99.409
132	Poiskovaya	41.56	0.029	21.081	3.009	6.793	0.305	21.253	4.315	0.06	98.418
75	Poiskovaya	41.579	0.267	18.416	6.118	6.999	0.355	20.755	4.714	0.068	99.271
37	Poiskovaya	41.589	0.069	19.259	4.735	7.196	0.326	20.562	5.206	0.02	98.962
115	Poiskovaya	41.6	0.835	19.287	2.513	8.318	0.269	20.958	4.542	0.114	98.479
124	Poiskovaya	41.605	0.844	20.516	1.458	8.226	0.273	21.37	4.247	0.126	98.665
65	Poiskovaya	41.613	0.408	20.292	2.679	7.593	0.28	21.738	3.915	0.107	98.625
12	Poiskovaya	41.622	1.248	20.4	0.564	11.292	0.311	19.467	4.502	0.138	99.561
56	Poiskovaya	41.632	0.047	18.774	5.431	7.556	0.331	20.076	5.314	0.003	99.164
121	Poiskovaya	41.642	0.184	18.646	6.09	6.626	0.335	20.64	4.95	0.076	99.241
126	Poiskovaya	41.657	1.039	19.866	2.175	8.223	0.303	20.98	4.751	0.114	99.133
57	Poiskovaya	41.678	0.294	18.908	5.843	7.12	0.363	20.693	4.749	0.093	99.747
113	Poiskovaya	41.678	0.267	18.765	5.579	7.665	0.369	20.155	4.521	0.065	99.088
117	Poiskovaya	41.687	0.982	20.547	0.854	9.936	0.264	19.979	4.221	0.143	98.623
45	Poiskovaya	41.698	0.432	21.845	1.375	8.525	0.303	20.863	4.001	0.06	99.123
103	Poiskovaya	41.701	0.351	19.122	4.511	7.011	0.331	21.048	4.73	0.067	98.879
63	Poiskovaya	41.719	0.658	20.214	2.632	8.417	0.338	20.365	4.717	0.12	99.19
10	Poiskovaya	41.732	0.13	20.144	3.61	7.661	0.323	20.565	4.937	0.019	99.121
96	Poiskovaya	41.732	0.454	18.941	4.968	7.078	0.329	20.82	4.74	0.07	99.132
26	Poiskovaya	41.738	0.566	19.392	4.466	7.321	0.365	21.32	4.959	0.12	100.247
52	Poiskovaya	41.743	0.21	18.654	5.114	6.99	0.276	20.668	4.984	0.118	98.795
82	Poiskovaya	41.746	0.385	20.933	2.434	7.891	0.324	20.611	4.229	0.141	98.718
46	Poiskovaya	41.757	1.051	20.467	1.377	8.886	0.275	21.056	4.439	0.095	99.438
105	Poiskovaya	41.759	0.514	20.753	2.616	7.566	0.313	21.003	4.562	0.063	99.183
16	Poiskovaya	41.761	0.264	20.128	3.389	8.035	0.301	20.848	4.85	0.022	99.598
110	Poiskovaya	41.765	0.341	20.526	3.191	7.337	0.38	21.268	4.552	0.039	99.399
87	Poiskovaya	41.769	0.393	20.479	2.915	7.495	0.353	21.138	4.528	0.069	99.176
104	Poiskovaya	41.803	0.054	18.692	5.864	7.018	0.332	20.503	5.517	0.042	99.825
90	Poiskovaya	41.805	0.636	21.377	1.678	8.558	0.295	20.617	4.49	0.066	99.522
8	Poiskovaya	41.81	0.534	19.848	3.127	7.004	0.289	21.23	4.487	0.08	98.414
50	Poiskovaya	41.828	1.155	20.907	0.22	11.961	0.272	18.965	4.209	0.182	99.699
109	Poiskovaya	41.851	0.039	21.297	2.81	7.222	0.236	19.79	6.437	0.063	99.745
69	Poiskovaya	41.853	0.498	20.61	2.426	7.32	0.302	21.123	4.31	0.156	98.598
40	Poiskovaya	41.856	0.264	19.931	4.375	6.968	0.353	21.261	4.544	0.039	99.622
2	Poiskovaya	41.857	0.721	18.228	5.125	7.343	0.301	20.699	5.124	0.107	99.505
4	Poiskovaya	41.861	0.33	20.171	3.595	7.114	0.357	21.185	4.688	0.08	99.382
35	Poiskovaya	41.865	0.59	21.238	1.686	9.196	0.35	20.801	4.076	0.056	99.858
72	Poiskovaya	41.875	0.977	20.025	1.313	9.024	0.269	21.199	4.454	0.092	99.228
49	Poiskovaya	41.889	1.101	20.39	0.964	10.268	0.234	19.824	4.516	0.133	99.319
59	Poiskovaya	41.89	0.526	21.861	0.191	11.797	0.211	19.292	4.196	0.163	100.129
101	Poiskovaya	41.892	0.979	19.594	2.591	7.1	0.231	21.485	4.677	0.047	98.608
114	Poiskovaya	41.898	0.147	21.475	2.233	7.258	0.303	21.463	4.045	0.024	98.871
74	Poiskovaya	41.908	0.364	18.931	5.197	6.603	0.306	21.669	4.201	0.05	99.238
13	Poiskovaya	41.91	0.53	19.138	5.432	7.057	0.314	20.68	5.222	0.065	100.366
123	Poiskovaya	41.913	0.781	20.437	1.465	8.215	0.276	21.619	4.305	0.126	99.147
6	Poiskovaya	41.918	0.576	19.051	4.499	7.137	0.289	20.87	5.209	0.087	99.67
53	Poiskovaya	41.931	0.597	19.567	3.446	7.361	0.234	21.712	4.404	0.072	99.336
30	Poiskovaya	41.936	0.237	18.756	5.663	6.798	0.337	20.896	4.571	0.036	99.23
125	Poiskovaya	41.941	0.474	20.004	3.31	8.033	0.295	20.357	4.398	0.075	98.894
5	Poiskovaya	41.952	0.371	20.509	3.161	8.038	0.327	21.307	4.484	0.089	100.246
3	Poiskovaya	41.963	0.938	20.27	1.697	8.765	0.242	20.813	4.416	0.072	99.187
98	Poiskovaya	41.965	0.821	19.976	2.3	8.086	0.251	20.857	4.508	0.127	98.907
41	Poiskovaya	41.966	1.014	20.184	1.781	8.128	0.28	21.228	4.5	0.058	99.175
81	Poiskovaya	41.968	0.873	19.975	1.552	8.123	0.225	21.238	4.346	0.052	98.382
14	Poiskovaya	41.971	0	16.51	9.571	6.546	0.343	23.798	0.995	0.028	99.79
85	Poiskovaya	41.989	0.252	20.924	2.922	7.007	0.373	21.432	4.218	0.071	99.188
61	Poiskovaya	41.998	0.651	20.322	3.049	7.529	0.324	21.274	4.359	0.086	99.624
107	Poiskovaya	41.998	0.937	20.496	1.194	9.27	0.25	21.127	4.215	0.097	99.596
135	Poiskovaya	41.998	0.845	20.05	2.266	7.76	0.294	21.551	4.523	0.116	99.42
71	Poiskovaya	42.013	0.36	20.942	2.773	7.574	0.302	21.187	3.824	0.096	99.071
32	Poiskovaya	42.018	1.044	20.464	1.426	9.275	0.238	20.88	4.415	0.078	99.84
84	Poiskovaya	42.022	0.854	20.092	1.835	7.844	0.214	21.26	4.411	0.132	98.664
29	Poiskovaya	42.041	0.013	22.781	0.423	6.303	0.26	20.214	6.721	0.069	98.825
142	Poiskovaya	42.044	0.247	19.83	3.072	6.796	0.224	21.231	4.59	0.046	98.098
60	Poiskovaya	42.076	0.362	20.261	3.567	6.804	0.362	21.447	4.347	0.066	99.292
138	Poiskovaya	42.087	0.399	20.745	2.758	7.106	0.344	21.381	4.274	0.074	99.168
22	Poiskovaya	42.089	0.922	20.62	1.472	8.342	0.244	21.399	4.4	0.11	99.643
97	Poiskovaya	42.101	1.153	20.211	1.117	9.609	0.247	20.624	4.436	0.135	99.671
70	Poiskovaya	42.105	0.753	19.341	3.172	7.928	0.238	20.925	4.467	0.189	99.157
141	Poiskovaya	42.12	0.573	21.075	2.147	6.484	0.274	22.014	4.11	0.121	98.918
62	Poiskovaya	42.126	0.865	20.581	1.143	8.724	0.26	21.592	4.252	0.168	99.74
1	Poiskovaya	42.127	0.803	20.491	1.972	8.264	0.233	21.467	4.467	0.119	99.979
108	Poiskovaya	42.14	0.018	21.603	2.727	6.658	0.309	22.042	3.744	0.027	99.299
89	Poiskovaya	42.163	0.423	21.402	1.862	6.977	0.289	22.329	4.036	0.032	99.513
118	Poiskovaya	42.169	0.958	20.404	1.184	10.121	0.231	20.151	4.327	0.135	99.68
33	Poiskovaya	42.175	0.37	21.859	1.944	6.989	0.324	21.917	3.816	0.046	99.44
80	Poiskovaya	42.191	0.082	20.741	3.536	6.353	0.304	22.572	2.881	0.073	98.754
20	Poiskovaya	42.193	0.712	20.785	1.571	8.468	0.249	21.54	4.081	0.077	99.686
24	Poiskovaya	42.238	0.428	20.521	3.286	7.091	0.34	21.688	4.67	0.058	100.321
102	Poiskovaya	42.248	0.203	20.985	3.148	6.645	0.339	21.555	4.217	0.06	99.4
145	Poiskovaya	42.251	0.759	21.456	0.384	9.505	0.251	21.284	4.161	0.077	100.13
137	Poiskovaya	42.277	0.47	20.222	3.317	7.849	0.333	20.96	4.323	0.028	99.779
21	Poiskovaya	42.296	0.438	20.621	2.809	7.828	0.314	20.873	4.515	0.064	99.765
28	Poiskovaya	42.628	0.459	20.828	2.054	8.072	0.298	21.567	4.474	0.104	100.501
9	Poiskovaya	42.69	0.829	20.523	1.699	8.272	0.251	21.192	4.422	0.058	99.936
165	Poiskovaya	40.555	0.494	21.657	0.147	11.833	0.24	11.686	12.83	0.197	99.639
183	Poiskovaya	40.82	0.483	15.97	8.994	6.783	0.378	19.483	5.996	0.044	98.951
182	Poiskovaya	40.95	0.579	18.216	5.383	9.049	0.301	19.489	5.127	0.09	99.184
181	Poiskovaya	41.247	1.131	18.981	3.321	8.772	0.335	19.886	5.244	0.063	99.011
168	Poiskovaya	41.291	0.293	17.605	7.317	6.741	0.312	20.869	5.047	0.046	99.527
184	Poiskovaya	41.348	0.899	17.876	5.177	7.054	0.289	20.322	5.441	0.054	98.485
170	Poiskovaya	41.376	0.731	20.766	1.933	7.691	0.274	20.959	4.195	0.104	98.029
160	Poiskovaya	41.381	0.804	17.167	6.605	7.08	0.304	20.602	5.607	0.054	99.612
174	Poiskovaya	41.384	0.558	18.971	4.973	7.48	0.309	20.81	4.545	0.031	99.092
173	Poiskovaya	41.456	0.579	20.962	1.746	8.412	0.262	20.701	4.026	0.058	98.226
154	Poiskovaya	41.514	0.089	18.776	5.476	6.63	0.276	20.465	5.374	0.036	98.638
180	Poiskovaya	41.517	0.07	20.749	1.732	7.876	0.213	16.874	10.101	0.101	99.233
176	Poiskovaya	41.524	0.578	19.345	4.201	7.734	0.326	20.707	4.976	0.065	99.477
152	Poiskovaya	41.536	0.421	18.828	5.47	7.259	0.306	20.439	5.178	0	99.495
167	Poiskovaya	41.568	0.269	18.222	6.143	7.103	0.288	20.492	5.26	0.023	99.37
186	Poiskovaya	41.599	0.202	19.917	3.729	6.012	0.29	18.523	8.732	0.064	99.068
153	Poiskovaya	41.61	0.783	19.914	2.695	8.46	0.372	20.314	4.93	0.067	99.202
171	Poiskovaya	41.617	0.139	16.889	7.471	6.938	0.312	19.944	5.736	0.034	99.085
166	Poiskovaya	41.629	0.503	19.388	4.44	6.931	0.352	21.182	4.691	0.105	99.224
147	Poiskovaya	41.694	0.892	20.34	1.55	8.055	0.29	21.253	4.49	0.077	98.683
157	Poiskovaya	41.707	0.421	20.179	4.008	7.134	0.335	21.343	4.592	0.058	99.794
162	Poiskovaya	41.726	0.566	20.689	2.286	9.597	0.354	20.165	4.155	0.068	99.629
146	Poiskovaya	41.75	0.319	19.113	5.332	7.084	0.341	21.18	4.663	0.048	99.83
172	Poiskovaya	41.76	0.38	19.421	4.714	7.029	0.303	20.74	4.707	0.042	99.108
150	Poiskovaya	41.885	0.02	17.931	7.764	6.356	0.329	22.734	2.49	0.048	99.557
185	Poiskovaya	41.898	1.016	19.748	2.769	7.943	0.289	20.947	4.705	0.083	99.422
148	Poiskovaya	41.912	0.658	20.701	1.601	7.524	0.272	21.039	4.434	0.057	98.207
179	Poiskovaya	41.963	0	20.832	3.647	6.909	0.37	20.468	5.109	0.006	99.313
177	Poiskovaya	41.997	0.191	19.496	4.681	6.873	0.296	20.931	5.057	0.039	99.572
149	Poiskovaya	42.033	0.734	19.627	3.099	7.283	0.279	21.24	4.547	0.094	98.983
156	Poiskovaya	42.085	0.855	20.238	1.782	7.915	0.311	21.759	4.324	0.102	99.393
175	Poiskovaya	42.103	1.012	20.213	1.514	8.778	0.257	20.759	4.458	0.069	99.163
161	Poiskovaya	42.108	0.007	21.182	2.568	7.221	0.321	21.212	4.284	0.03	98.933
159	Poiskovaya	42.115	1.016	20.534	0.895	8.698	0.208	21.226	4.769	0.094	99.603
163	Poiskovaya	42.142	0.896	20.565	1.468	8.091	0.214	21.293	4.337	0.112	99.119
151	Poiskovaya	42.169	0.271	20.912	2.864	6.427	0.306	21.709	4.305	0.073	99.044
155	Poiskovaya	42.2	0.622	20.953	1.634	8.154	0.221	21.689	4.125	0.077	99.716
187	Poiskovaya	42.234	0.7	20.714	1.438	8.324	0.244	21.026	4.106	0.104	98.917
178	Poiskovaya	42.241	0.852	20.715	0.935	9.431	0.219	20.973	4.192	0.12	99.692
158	Poiskovaya	42.254	0.725	20.94	1.662	7.742	0.297	21.301	4.484	0.057	99.482
169	Poiskovaya	42.261	0.865	20.758	1.109	8.675	0.207	21.352	4.271	0.091	99.6
164	Poiskovaya	42.276	0.226	21.441	2.642	5.71	0.298	22.139	4.388	0.045	99.21
7	Novinka	42.261	0.103	20.536	3.826	6.671	0.361	22.432	3.779	0.014	100.003
8	Novinka	41.822	0.533	20.035	4.064	6.931	0.365	21.569	4.868	0.044	100.251
9	Novinka	41.683	0.988	18.672	3.938	8.241	0.339	20.859	4.946	0.107	99.773
10	Novinka	42.371	0.891	20.723	1.122	8.72	0.262	21.148	4.427	0.09	99.792
11	Novinka	42.435	0.778	20.267	1.374	8.675	0.285	21.419	4.345	0.104	99.691
12	Novinka	41.901	0.191	19.072	4.941	7.049	0.388	20.739	5.028	0.044	99.357
13	Novinka	41.955	0.936	20.642	0.908	9.014	0.219	20.866	4.715	0.111	99.368
14	Novinka	42.22	0.101	20.252	3.574	6.439	0.347	21.578	4.441	0.031	98.983
15	Novinka	41.607	0.04	19.107	5.068	7.142	0.383	20.222	5.399	0.065	99.035
16	Novinka	42.057	0.018	20.595	3.276	6.466	0.293	21.424	4.292	0.006	98.427
17	Novinka	41.726	0.896	20.046	1.522	8.982	0.312	20.69	4.482	0.056	98.712
18	Novinka	41.021	0.425	17.527	6.832	8.105	0.384	19.923	4.587	0.119	98.923
19	Novinka	41.191	0.514	18.93	4.851	6.912	0.383	20.816	4.705	0.112	98.438
20	Novinka	42.208	0.365	20.576	2.869	7.32	0.312	21.399	4.371	0.04	99.46
21	Novinka	41.029	0.039	14.718	11.621	6.5	0.381	22.017	3.294	0	99.632
22	Novinka	40.947	0.357	19.489	3.817	8.155	0.341	20.671	4.674	0.056	98.55
23	Novinka	41.53	0.063	16.507	9.141	6.681	0.378	22.32	2.9	0.012	99.535
24	Novinka	42.01	0.238	18.421	5.974	6.658	0.337	21.667	4.533	0.07	99.908
25	Novinka	42.304	0.292	20.512	3.48	6.924	0.402	21.893	3.898	0.115	99.834
26	Novinka	42.566	0.841	21.059	0.725	8.421	0.276	21.66	4.15	0.097	99.804
27	Novinka	42.549	0.443	21.131	2.563	7.221	0.36	21.469	4.679	0.089	100.504
28	Novinka	42.222	0.659	21.214	1.645	7.965	0.315	21.521	4.17	0.109	99.823
29	Novinka	42.147	0.847	20.229	1.464	8.871	0.238	21.122	4.528	0.134	99.602
30	Novinka	41.59	0.214	19.064	5.145	7.025	0.379	20.899	4.971	0.082	99.369
31	Novinka	40.841	0.436	17.356	7.297	7.034	0.386	20.516	5.001	0.087	98.954
32	Novinka	42.423	0	20.613	3.653	6.926	0.342	21.552	4.404	0.023	99.936
33	Novinka	42.349	0.174	20.306	3.664	7.527	0.315	20.841	4.664	0.02	99.904
34	Novinka	41.528	0.109	15.086	10.529	5.958	0.395	21.642	4.138	0.04	99.432
35	Novinka	42.06	0.254	19.596	4.163	7.152	0.359	21.045	4.618	0.047	99.311
36	Novinka	41.831	0.436	20.686	2.409	7.837	0.287	21.139	4.346	0.066	99.064
37	Novinka	41.845	0.458	19.695	3.784	7.222	0.386	20.817	4.776	0	98.986
38	Novinka	42.243	0.777	20.415	1.509	8.223	0.247	21.291	4.341	0.104	99.176
39	Novinka	42.022	0.047	16.308	9.449	6.184	0.403	23.839	1.198	0.012	99.497
40	Novinka	41.901	0.31	19.184	4.751	6.903	0.384	21.028	4.459	0.044	98.973
41	Novinka	41.843	0.96	20.145	1.477	8.976	0.301	20.843	4.525	0.088	99.186
42	Novinka	41.681	0.363	18.87	5.044	7.044	0.391	20.852	5.055	0.109	99.426
43	Novinka	41.021	0.082	19.135	4.906	7.176	0.426	20.487	5.239	0.003	98.484
44	Novinka	41.935	0.578	21.375	1.583	8.219	0.33	21.011	4.009	0.066	99.141
45	Novinka	41.63	0.853	20.211	1.424	8.476	0.285	20.772	4.412	0.11	98.173
46	Novinka	41.366	0.024	15.547	10.301	6.585	0.419	22.815	2.239	0.021	99.325
47	Novinka	41.187	0.906	19.561	2.802	8.146	0.326	19.872	5.432	0.068	98.312
48	Novinka	42	0.296	19.229	5.114	6.915	0.313	21.176	4.348	0.067	99.466
49	Novinka	47.727	0.85	9.057	1.903	4.291	0.231	14.037	18.879	1.045	98.032
50	Novinka	41.531	0.063	20.795	2.512	9.202	0.393	19.778	5.027	0.036	99.337
51	Novinka	41.854	0.507	19.55	4.027	7.126	0.353	21.127	4.674	0.079	99.311
52	Novinka	42.139	0.178	18.267	6.095	6.705	0.396	21.799	4.059	0.097	99.773
53	Novinka	41.264	0.615	18.676	4.644	7.675	0.408	19.025	7.173	0.066	99.546
54	Novinka	41.285	0.478	19.623	3.975	6.443	0.329	20.553	6.144	0.012	98.842
55	Novinka	41.252	0.223	19.77	3.685	7.028	0.276	21.082	4.65	0.017	97.99
56	Novinka	42.098	0.953	20.358	1.522	8.944	0.304	20.75	4.484	0.082	99.495
57	Novinka	42.577	0.7	21.201	1.592	8.185	0.338	21.325	4.183	0.026	100.127
58	Novinka	42.077	0.254	18.427	5.811	6.993	0.332	21.211	5.108	0.08	100.315
59	Novinka	42.519	0.576	21.252	2.058	7.791	0.352	22.027	3.855	0.066	100.499
60	Novinka	42.266	0.48	20.817	2.514	7.202	0.333	21.354	4.389	0.057	99.432
61	Novinka	41.942	0.443	20.999	2.373	7.218	0.37	21.205	4.676	0.06	99.293
62	Novinka	41.504	0.29	19.907	3.435	7.42	0.366	21.042	4.85	0.02	98.834
63	Novinka	42.572	0.371	20.761	3.139	6.916	0.327	21.576	4.431	0.092	100.225
64	Novinka	42.288	0.932	20.538	1.492	8.93	0.308	20.099	4.524	0.108	99.234
65	Novinka	41.63	0.441	18.409	5.685	6.726	0.382	21.057	5.132	0.083	99.546
66	Novinka	41.361	0.022	18.547	5.826	7.14	0.36	20.361	5.1	0.056	98.776
67	Novinka	41.883	0.235	20.342	3.469	7.549	0.348	21.094	4.655	0.035	99.61
68	Novinka	41.85	0.477	21.772	0.824	6.945	0.363	21.918	3.659	0.098	97.906
69	Novinka	41.538	0.378	20.696	2.606	7.146	0.317	21.275	4.326	0.083	98.365
70	Novinka	41.811	0.945	19.823	1.862	9.294	0.373	20.381	4.515	0.059	99.063
71	Novinka	42.734	0.379	20.589	3.2	6.648	0.344	21.942	4.202	0.137	100.191
72	Novinka	41.498	0.104	19.386	4.453	8.126	0.389	18.713	6.43	0.081	99.18
73	Novinka	41.877	0.933	20.516	1.019	8.491	0.295	21.502	4.233	0.072	98.975
74	Novinka	42.31	0.511	20.787	2.068	7.664	0.31	21.327	4.532	0.092	99.601
75	Novinka	41.824	0.148	19.308	4.918	7.108	0.403	20.846	4.706	0.082	99.35
76	Novinka	41.528	0.091	19.913	3.565	6.942	0.304	20.988	4.678	0.038	98.047
77	Novinka	41.638	0.977	20.198	1.455	8.926	0.303	20.739	4.512	0.126	98.874
78	Novinka	42.191	0.811	20.372	1.057	8.199	0.199	21.03	4.398	0.089	98.362
79	Novinka	41.77	0.271	19.85	3.552	7.569	0.324	20.703	4.663	0.061	98.763
80	Novinka	42.075	0.959	20.23	1.03	9.622	0.33	21.06	4.379	0.285	99.97
81	Novinka	41.703	0.326	19.887	3.456	7.057	0.315	21.177	4.954	0.049	98.924
82	Novinka	41.662	0.267	18.182	5.611	6.993	0.354	20.366	5.373	0	98.808
83	Novinka	42.127	0.863	20.53	1.028	8.898	0.293	21.08	4.46	0.093	99.418
84	Novinka	41.651	0.307	19.363	3.999	7.422	0.338	21.068	4.896	0.298	99.342
85	Novinka	42.48	0.363	20.751	2.627	7.407	0.306	21.481	4.562	0.069	100.055
86	Novinka	42.143	0.859	20.79	1.152	8.465	0.26	21.54	4.363	0.069	99.644
87	Novinka	41.89	0.629	20.161	3.319	7.06	0.312	21.438	4.273	0.115	99.197
88	Novinka	42.296	0.848	20.414	1.456	8.721	0.268	21.337	4.363	0.131	99.844
89	Novinka	41.937	0.375	19.791	2.852	7.246	0.313	21.024	4.553	0.061	98.165
90	Novinka	42.058	0.843	20.503	1.369	8.093	0.277	21.78	4.383	0.101	99.416
91	Novinka	41.858	1.188	20.165	0.813	10.435	0.321	20.242	4.402	0.116	99.56
92	Novinka	41.871	1.001	20.303	1.576	9.075	0.297	20.59	4.441	0.082	99.245
93	Novinka	41.779	0.915	20.148	1.601	8.994	0.295	20.863	4.431	0.103	99.129
94	Novinka	42.191	0.908	20.257	1.467	8.99	0.288	20.935	4.479	0.079	99.615
95	Novinka	42.685	0.516	22.689	0.466	6.935	0.273	21.919	4.304	0.059	99.846
325let-137	325 let Yakutii	41.814	0.569	19.693	4.242	6.483	0.265	19.238	7.744	0.077	100.137
325let-138	325 let Yakutii	41.761	1.197	19.081	3.38	8.542	0.309	20.461	4.994	0.06	99.806
325let-139	325 let Yakutii	41.895	0.594	19.194	5.02	7.478	0.312	20.843	4.933	0.066	100.335
325let-140	325 let Yakutii	41.882	1.027	20.224	2.355	7.946	0.309	21.129	4.732	0.056	99.66
325let-141	325 let Yakutii	41.672	0.183	17.056	7.28	7.214	0.327	19.727	6.245	0.009	99.713
325let-142	325 let Yakutii	42.23	0.411	22.003	1.787	7.139	0.293	22.297	3.795	0.055	100.012
325let-143	325 let Yakutii	41.771	0.811	20.221	2.349	9.062	0.34	19.652	5.64	0.057	99.903
325let-144	325 let Yakutii	42.22	1.015	20.432	1.194	9.551	0.229	20.91	4.465	0.046	100.062
325let-145	325 let Yakutii	41.611	0.149	17.321	7.196	7.383	0.281	19.973	6.351	0.018	100.29
325let-146	325 let Yakutii	42.557	0	19.833	4.895	6.237	0.324	21.809	4.219	0.025	99.919
325let-147	325 let Yakutii	42.095	0.039	15.511	10.811	6.368	0.293	23.816	1.599	0.012	100.558
325let-148	325 let Yakutii	41.305	0.13	16.308	8.463	7.273	0.333	19.307	6.629	0	99.748
325let-149	325 let Yakutii	42.184	0.983	20.133	1.825	9.24	0.282	20.547	4.395	0.057	99.653
325let-150	325 let Yakutii	41.826	0.975	19.242	3.793	8.002	0.27	21.064	4.941	0.06	100.181
325let-151	325 let Yakutii	41.848	0.693	18.307	5.371	7.764	0.295	20.611	5.582	0.032	100.503
325let-152	325 let Yakutii	41.665	0.913	19.082	3.646	8.986	0.298	20.217	4.924	0.058	99.789
325let-153	325 let Yakutii	42.465	0.516	21.077	1.598	8.483	0.299	21.322	4.355	0.025	100.151
325let-154	325 let Yakutii	41.619	0.532	17.907	6.493	6.924	0.286	20.594	5.483	0.026	99.864
325let-155	325 let Yakutii	41.912	0.199	19.076	4.583	7.514	0.319	20.43	5.651	0.031	99.715
325let-156	325 let Yakutii	40.696	0.54	16.66	7.701	7.923	0.399	17.419	8.293	0.099	99.733
325let-157	325 let Yakutii	42.384	0.934	20.372	1.582	8.455	0.256	21.385	4.525	0.073	99.967
325let-158	325 let Yakutii	41.045	0.205	15.679	10.227	6.068	0.333	22.155	3.457	0.012	99.181
325let-159	325 let Yakutii	41.877	1.11	18.59	4.041	8.471	0.295	20.207	5.403	0.058	100.057
325let-160	325 let Yakutii	42.123	0.19	19.171	4.67	7.401	0.29	20.792	5.496	0.048	100.181
325let-161	325 let Yakutii	42.254	1.04	20.048	2.598	7.965	0.271	21.422	4.796	0.045	100.439
325let-162	325 let Yakutii	41.975	0.257	19.854	4.559	6.78	0.314	21.77	4.4	0.056	99.965
325let-163	325 let Yakutii	42.041	0.863	20.704	1.284	8.373	0.256	21.775	4.249	0.02	99.565
325let-164	325 let Yakutii	42.145	0.315	20.555	3.523	6.615	0.267	21.947	4.233	0.041	99.641
325let-165	325 let Yakutii	41.957	0.336	18.264	5.685	7.388	0.324	20.308	5.929	0.003	100.194
325let-166	325 let Yakutii	41.014	1.289	18.501	4.203	8.176	0.304	20.428	5.228	0.069	99.217
325let-167	325 let Yakutii	41.544	0.926	20.325	2.344	8.826	0.261	20.593	4.513	0.097	99.432
325let-168	325 let Yakutii	42.642	0.962	20.717	1.273	8.678	0.227	21.882	4.381	0.09	100.866
325let-169	325 let Yakutii	42.255	0.995	21.766	0.033	9.284	0.242	21.34	4.192	0.131	100.238
325let-170	325 let Yakutii	42.567	0.441	21.291	2.239	7.091	0.304	21.753	4.605	0.05	100.341
325let-171	325 let Yakutii	42.214	1.112	20.031	2.081	8.492	0.3	20.83	4.745	0.045	99.875
325let-172	325 let Yakutii	41.752	0.87	21.682	0.112	11.038	0.212	16.412	8.114	0.105	100.297
325let-173	325 let Yakutii	42.159	0.456	20.336	3.73	6.653	0.306	21.945	4.23	0.067	99.882
325let-174	325 let Yakutii	42.065	0.692	18.212	5.844	7.092	0.34	21.204	4.958	0.057	100.472
360	Legkaya	40.2	1.191	14.778	8.694	7.528	0.31	19.387	6.522	0.128	98.738
313	Legkaya	40.312	0.244	14.466	10.017	7.362	0.304	18.11	7.375	0.018	98.257
340	Legkaya	40.496	0.451	19.08	4.405	6.372	0.317	19.75	6.477	0.036	97.417
278	Legkaya	40.497	1.067	17.326	5.514	8.134	0.358	19.602	5.439	0.067	98.036
351	Legkaya	40.532	0.208	17.696	6.345	7.715	0.346	19.394	6.038	0	98.274
290	Legkaya	40.677	1.019	15.558	8.13	7.656	0.34	19.531	6.17	0.086	99.167
316	Legkaya	40.678	0.588	17.84	5.874	7.074	0.348	20.256	5.088	0.102	97.848
285	Legkaya	40.697	1.028	20.736	0.056	13.374	0.362	18.304	4.312	0.074	98.943
318	Legkaya	40.697	1.032	19.588	1.503	10.18	0.289	19.659	4.647	0.086	97.681
342	Legkaya	40.749	0.99	17.334	5.699	8.117	0.348	19.834	5.488	0.101	98.708
317	Legkaya	40.753	0.998	19.514	2.329	8.817	0.31	19.813	5.088	0.059	97.681
338	Legkaya	40.786	0.227	19.649	3.965	9.183	0.335	19.307	4.837	0.049	98.338
337	Legkaya	40.839	0.51	21.004	0.66	14.422	0.518	15.915	5.924	0.027	99.828
354	Legkaya	40.846	0.894	19.963	1.396	8.405	0.241	20.699	4.359	0.089	96.942
369	Legkaya	40.874	1.154	18.065	4.222	8.069	0.309	20.239	5.318	0.057	98.307
373	Legkaya	40.933	0	13.001	13.329	6.16	0.368	20.855	4.55	0.039	99.245
348	Legkaya	40.944	1.154	18.585	3.128	8.565	0.31	19.982	5.266	0.122	98.056
356	Legkaya	40.96	0.117	17.035	7.692	7.087	0.417	19.899	5.794	0	99.001
305	Legkaya	40.982	1.121	17.711	5.52	7.518	0.322	20.249	5.494	0.083	99.017
383	Legkaya	40.997	1.006	18.786	3.625	8.504	0.29	19.754	5.432	0.046	98.452
298	Legkaya	41.013	0.774	18.848	4.575	7.426	0.373	20.395	5.055	0.062	98.523
286	Legkaya	41.015	0.932	19.253	3.588	8.375	0.365	19.92	5.093	0.08	98.643
371	Legkaya	41.022	1.3	17.536	5.09	8.176	0.309	19.861	5.713	0.141	99.148
279	Legkaya	41.069	0.701	18.474	4.859	7.015	0.294	20.776	5.309	0.096	98.593
299	Legkaya	41.074	1.151	18.946	3.225	8.771	0.353	19.892	5.212	0.071	98.708
377	Legkaya	41.076	1.139	20.357	0.139	12.471	0.332	18.545	4.489	0.099	98.67
339	Legkaya	41.083	0.97	19.929	1.515	8.593	0.264	20.717	4.471	0.095	97.666
347	Legkaya	41.101	0.998	20.178	1.985	8.49	0.34	20.359	4.914	0.031	98.445
334	Legkaya	41.139	0.588	20.906	0.511	14.202	0.473	15.94	5.948	0.085	99.792
322	Legkaya	41.145	0.137	17.451	6.953	7.418	0.323	19.616	6.302	0.061	99.406
282	Legkaya	41.145	0.442	19.816	4.215	6.861	0.347	20.537	5.108	0.106	98.632
284	Legkaya	41.153	0.47	19.243	4.44	6.418	0.3	19.599	6.438	0.053	98.114
300	Legkaya	41.161	0.442	19.962	3.651	6.387	0.314	20.994	4.698	0.079	97.688
301	Legkaya	41.165	0.101	18.965	5.932	5.952	0.301	22.83	2.557	0.008	97.829
295	Legkaya	41.2	1.012	20.105	1.932	9.777	0.304	20.183	4.629	0.097	99.239
292	Legkaya	41.204	0.379	19.009	4.734	7.376	0.372	20.382	4.797	0.082	98.347
382	Legkaya	41.232	0.916	19.539	3.261	8.428	0.317	20.196	4.993	0.082	98.998
320	Legkaya	41.237	0.121	17.379	7.931	6.969	0.41	19.849	5.237	0.064	99.198
302	Legkaya	41.25	0.951	20.334	1.247	8.98	0.252	20.708	4.426	0.05	98.225
353	Legkaya	41.254	1.006	20.193	1.279	8.869	0.252	19.61	4.933	0.218	97.614
344	Legkaya	41.263	0.595	19.867	3.157	9.158	0.326	19.961	4.506	0.048	98.899
294	Legkaya	41.275	1.079	18.497	4.152	8.625	0.346	19.906	5.701	0.066	99.664
281	Legkaya	41.283	0.942	19.552	2.618	9.397	0.305	19.544	4.829	0.066	98.536
307	Legkaya	41.307	0.571	19.484	3.742	7.995	0.306	20.702	4.177	0.101	98.4
325	Legkaya	41.312	0.557	17.96	6.094	8.842	0.343	19.562	5.074	0.055	99.799
349	Legkaya	41.315	0.804	19.317	3.491	7.853	0.265	20.799	4.813	0.112	98.788
361	Legkaya	41.324	0.6	19.919	3.383	7.148	0.312	19.826	5.883	0.092	98.517
350	Legkaya	41.326	1.004	20.131	1.121	9.414	0.207	20.651	4.434	0.104	98.436
333	Legkaya	41.332	0.464	19.346	4.437	6.568	0.283	19.819	6.62	0.05	98.919
385	Legkaya	41.338	0.808	19.504	2.765	9.049	0.333	19.183	6.027	0.134	99.141
345	Legkaya	41.371	0.546	20.15	2.835	7.938	0.29	20.356	4.638	0.025	98.149
343	Legkaya	41.376	0.214	17.614	6.304	7.486	0.324	19.891	6.209	0.026	99.481
374	Legkaya	41.376	0.66	20.126	3.016	7.307	0.343	20.055	5.865	0.139	98.923
381	Legkaya	41.376	0.446	18.272	5.24	6.94	0.328	20.962	5.357	0.048	99.008
362	Legkaya	41.39	0.868	19.999	1.914	8.736	0.282	20.653	4.593	0.095	98.552
326	Legkaya	41.427	0.66	20.91	2.196	7.762	0.293	20.742	4.536	0.055	98.617
321	Legkaya	41.437	1.052	20.772	0.77	10.646	0.259	19.858	4.46	0.083	99.337
280	Legkaya	41.438	0.455	19.596	4.13	6.435	0.263	19.967	6.325	0.119	98.757
328	Legkaya	41.441	0.152	17.294	6.975	7.495	0.376	19.532	6.362	0.058	99.685
291	Legkaya	41.46	0.164	17.764	6.412	7.402	0.334	19.594	6.119	0	99.253
335	Legkaya	41.465	0.657	20.508	2.171	8.271	0.267	20.813	4.499	0.075	98.759
315	Legkaya	41.467	0.911	21.144	0.417	9.385	0.278	20.789	4.304	0.067	98.762
379	Legkaya	41.468	0.574	20.935	1.755	8.377	0.279	20.701	4.49	0.036	98.654
288	Legkaya	41.474	0.115	17.453	7.73	7.011	0.368	21.173	4.138	0.011	99.485
341	Legkaya	41.505	0.338	20.372	2.671	7.275	0.321	21.085	4.605	0.027	98.23
380	Legkaya	41.507	0.353	21.609	1.796	7.287	0.34	21.491	3.91	0.081	98.406
293	Legkaya	41.519	1.754	19.485	1.068	8.838	0.16	20.963	4.9	0.089	98.807
372	Legkaya	41.526	0.265	20.585	2.782	7.762	0.326	20.82	4.471	0.055	98.648
352	Legkaya	41.538	0.82	20.14	2.14	8.749	0.329	20.48	4.703	0.05	98.974
346	Legkaya	41.538	0	21.32	2.535	8.185	0.502	20.883	3.409	0.047	98.433
367	Legkaya	41.542	0.607	21.878	0.364	13.473	0.327	18.111	3.797	0.127	100.272
303	Legkaya	41.547	0.919	20.648	1.013	8.773	0.264	20.573	4.253	0.069	98.09
304	Legkaya	41.557	0.642	21.144	1.561	8.647	0.309	21.006	4.19	0.047	99.103
386	Legkaya	41.597	0.327	19.493	4.079	7.075	0.337	20.693	4.481	0.014	98.113
384	Legkaya	41.6	0.66	20.224	2.685	7.521	0.334	21.026	4.701	0.075	98.861
331	Legkaya	41.622	0.92	20.131	2.193	9.22	0.329	20.554	4.661	0.079	99.732
289	Legkaya	41.625	0.438	19.625	4.036	6.486	0.299	20.13	6.453	0.05	99.144
336	Legkaya	41.631	0.14	20.124	3.15	7.608	0.333	20.515	5.165	0.039	98.729
366	Legkaya	41.634	0.561	21.425	1.486	8.6	0.249	20.947	4.235	0.039	99.178
332	Legkaya	41.651	1.052	20.208	1.874	9.566	0.31	20.2	4.753	0.127	99.753
311	Legkaya	41.655	0.453	19.615	4.113	5.844	0.242	20.958	5.59	0	98.49
323	Legkaya	41.66	1.075	18.675	3.856	8.476	0.329	20.26	5.178	0.103	99.633
375	Legkaya	41.667	0.246	18.557	5.14	7.514	0.296	19.978	5.687	0.045	99.13
310	Legkaya	41.669	0.019	20.956	3.359	7.777	0.431	20.568	4.235	0	99.014
364	Legkaya	41.678	0.942	20.287	1.885	9.239	0.282	20.3	4.654	0.084	99.351
324	Legkaya	41.685	0.269	19.643	4.011	7.138	0.302	21.058	4.712	0.05	98.896
376	Legkaya	41.701	0.015	21.414	3.099	7.865	0.418	21.169	3.56	0.017	99.269
283	Legkaya	41.759	0.263	20.253	3.156	7.293	0.34	20.701	4.861	0.08	98.727
357	Legkaya	41.776	0.147	21.059	2.881	7.1	0.321	21.533	4.017	0.049	98.926
309	Legkaya	41.787	0.766	21.002	0.985	8.441	0.239	21.103	4.174	0.11	98.624
308	Legkaya	41.791	0	20.821	3.427	8.063	0.329	21.793	2.37	0.036	98.631
358	Legkaya	41.799	0.963	20.011	2.381	8.555	0.294	20.455	4.972	0.067	99.509
297	Legkaya	41.833	0.637	21.131	1.633	8.634	0.32	20.906	4.136	0.042	99.272
319	Legkaya	41.839	0.952	20.233	1.197	9.73	0.235	20.324	4.567	0.025	99.105
378	Legkaya	41.858	0.94	20.94	0.602	9.841	0.281	20.716	4.235	0.092	99.508
370	Legkaya	41.865	0.654	20.744	2.199	9.246	0.332	19.805	4.327	0.071	99.251
359	Legkaya	41.871	0.6	18.876	4.843	6.476	0.284	20.018	6.271	0.067	99.309
355	Legkaya	41.879	0.415	19.886	4.003	7.242	0.358	20.968	4.491	0.097	99.38
330	Legkaya	41.996	0.96	20.436	1.371	8.516	0.232	20.909	4.563	0.122	99.105
277	Legkaya	42.042	0.371	21.647	1.809	7.321	0.289	21.563	3.944	0.022	99.036
296	Legkaya	42.056	0.925	19.785	2.575	9.012	0.3	20.527	4.919	0.099	100.202
363	Legkaya	42.056	0.831	20.471	1.232	9.053	0.273	20.918	4.397	0.097	99.359
327	Legkaya	42.057	0.928	20.775	0.959	9.911	0.271	20.302	4.353	0.11	99.721
329	Legkaya	42.125	0.45	22.195	1.336	7.712	0.291	21.54	3.854	0.073	99.576
368	Legkaya	42.137	1.034	19.33	3.296	8.232	0.26	20.768	4.958	0.068	100.103
287	Legkaya	42.16	0.008	22.169	2.044	7.644	0.41	21.549	2.865	0.054	98.903
306	Legkaya	42.199	0.842	19.997	1.855	8.668	0.252	20.927	4.596	0.067	99.426
312	Legkaya	42.205	0.859	20.352	1.387	9.46	0.291	20.3	4.486	0.065	99.405
314	Legkaya	42.262	0.959	21.166	0.297	8.644	0.257	21.124	4.585	0.055	99.349
365	Legkaya	42.265	0.948	20.935	0.752	8.706	0.256	21.017	4.307	0.091	99.283
259	Zimnaya	40.132	0.571	21.485	0.077	16.078	0.308	12.074	8.702	0.168	99.622
264	Zimnaya	40.16	0.574	14.263	10.266	7.403	0.428	18.102	7.825	0.069	99.09
251	Zimnaya	40.357	0.46	12.422	13.761	6.425	0.393	19.546	6.543	0.082	99.989
288	Zimnaya	40.482	0.645	15.912	8.504	7.543	0.405	19.262	6.221	0.085	99.059
267	Zimnaya	40.503	1.606	14.563	8.533	7.863	0.362	19.161	6.588	0.122	99.312
279	Zimnaya	40.601	0.05	22.437	0.444	15.774	0.485	15.021	5.688	0.003	100.503
214	Zimnaya	40.875	0.118	15.112	10.846	6.757	0.367	20.162	4.99	0.1	99.348
243	Zimnaya	40.965	0.361	15.075	9.908	6.934	0.316	18.987	7.284	0.053	99.92
258	Zimnaya	41.048	0.269	19.774	4.184	7.745	0.377	20.783	5.15	0.014	99.344
265	Zimnaya	41.067	0.358	16.05	9.64	6.874	0.415	22.024	3.646	0.067	100.184
296	Zimnaya	41.203	0.6	18.915	4.605	7.623	0.333	20.355	5.5	0.065	99.199
248	Zimnaya	41.254	0.602	20.755	0.618	14.568	0.517	16.526	5.686	0.063	100.589
250	Zimnaya	41.304	0.184	16.833	8.23	6.929	0.333	20.064	5.737	0.038	99.668
263	Zimnaya	41.383	0.905	20.211	1.43	9.692	0.251	20.685	4.416	0.121	99.094
238	Zimnaya	41.384	0.781	18.647	4.773	7.453	0.295	20.929	5.127	0.042	99.462
226	Zimnaya	41.389	0.848	17.982	5.793	7	0.426	19.908	6.58	0.151	100.077
295	Zimnaya	41.426	0.658	19.022	4.501	6.802	0.33	21.584	5.072	0.069	99.487
270	Zimnaya	41.442	0.957	20.393	1.166	9.763	0.288	20.6	4.509	0.121	99.261
207	Zimnaya	41.484	0.488	18.899	4.918	6.837	0.316	20.859	5.664	0.095	99.563
218	Zimnaya	41.484	0.38	20.159	3.394	6.896	0.299	21.364	4.673	0.047	98.696
217	Zimnaya	41.488	0.425	19.44	4.565	6.994	0.346	20.765	5.216	0.033	99.272
286	Zimnaya	41.488	1.054	20.13	1.674	9.511	0.288	20.778	4.455	0.076	99.475
220	Zimnaya	41.505	0.337	19.719	4.15	7.188	0.358	20.894	4.9	0.078	99.14
235	Zimnaya	41.505	0.543	18.118	5.916	6.872	0.333	21.011	5.076	0.07	99.444
240	Zimnaya	41.514	0.505	19.054	5.384	6.772	0.324	20.856	5.057	0.246	99.714
216	Zimnaya	41.536	0.857	18.432	4.981	7.759	0.326	20.65	4.981	0.111	99.635
206	Zimnaya	41.543	0.002	17.967	7.01	7.409	0.379	19.7	6.133	0.02	100.204
239	Zimnaya	41.548	0.253	19.193	4.584	7.276	0.304	20.921	4.803	0.103	98.985
241	Zimnaya	41.558	0.411	19.664	3.92	7.32	0.323	21.138	4.795	0.025	99.154
252	Zimnaya	41.567	0.381	19.985	3.652	6.622	0.319	21.051	5.187	0.063	98.836
260	Zimnaya	41.568	1.016	19.547	2.726	9.182	0.333	20.634	4.646	0.128	99.838
215	Zimnaya	41.599	0.572	19.72	3.814	6.941	0.345	20.439	5.304	0.061	98.795
225	Zimnaya	41.599	0.36	19.986	3.834	6.638	0.353	18.848	7.794	0.07	99.517
245	Zimnaya	41.601	0.338	18.086	6.633	5.931	0.309	20.536	6.274	0.042	99.762
278	Zimnaya	41.619	0.472	17.656	6.539	6.77	0.319	21.038	4.997	0.042	99.462
277	Zimnaya	41.625	0.49	20.382	3.115	6.957	0.359	20.024	6.441	0.03	99.454
246	Zimnaya	41.629	0.457	18.345	5.436	8.27	0.34	19.784	5.385	0.075	99.721
223	Zimnaya	41.63	0.39	19.193	4.522	6.976	0.33	21.29	4.912	0.089	99.332
210	Zimnaya	41.632	0.581	21.747	0.688	10.358	0.227	20.201	3.626	0.107	99.18
298	Zimnaya	41.651	0.509	20.283	3.072	7.404	0.323	21.052	5.037	0.119	99.45
254	Zimnaya	41.662	0.403	20.159	3.67	7.377	0.299	21.511	4.547	0.03	99.664
219	Zimnaya	41.688	0.899	20.319	1.601	8.537	0.275	21.147	4.517	0.066	99.061
300	Zimnaya	41.693	0.649	19.461	3.911	6.152	0.284	20.636	6.934	0.05	99.77
253	Zimnaya	41.699	0.492	20.859	2.479	7.307	0.316	21.541	4.598	0.068	99.394
297	Zimnaya	41.704	0.994	18.97	3.611	8.108	0.294	20.52	5.084	0.096	99.429
273	Zimnaya	41.709	1.018	20.339	1.256	9.841	0.285	20.693	4.492	0.118	99.751
275	Zimnaya	41.719	0.482	19.814	4.024	7.115	0.364	21.142	5.326	0.083	100.069
294	Zimnaya	41.72	0.447	18.676	5.688	6.408	0.284	20.52	5.471	0.028	99.242
249	Zimnaya	41.747	0.784	20.103	2.74	9.078	0.424	19.476	5.887	0.102	100.362
280	Zimnaya	41.761	0.468	17.686	6.196	6.803	0.304	21.158	5.06	0.062	99.498
208	Zimnaya	41.77	0.624	19.933	3.281	7.178	0.34	20.154	5.88	0.067	99.23
289	Zimnaya	41.771	0.465	19.95	3.562	8.162	0.311	21.239	4.374	0.056	99.89
268	Zimnaya	41.776	0.928	20.397	1.476	9.024	0.272	21.201	4.47	0.075	99.619
230	Zimnaya	41.779	0.799	19.459	3.722	7.872	0.287	20.991	4.817	0.101	99.858
285	Zimnaya	41.784	0.009	18.96	6.295	7.194	0.347	22.865	2.288	0.073	99.82
231	Zimnaya	41.79	0.57	21.189	1.586	8.73	0.34	20.408	5.094	0.044	99.773
281	Zimnaya	41.792	1.135	20.559	0.822	10.034	0.31	20.716	4.51	0.084	99.991
255	Zimnaya	41.797	0.828	20.155	2.706	8.173	0.301	21.149	4.546	0.103	99.758
287	Zimnaya	41.81	0.385	20.86	2.32	7.824	0.313	21.553	4.404	0.027	99.519
228	Zimnaya	41.818	0.476	19.034	5.226	7.153	0.385	21.271	4.78	0.109	100.286
221	Zimnaya	41.82	0.861	20.441	1.54	8.967	0.305	21.468	4.37	0.097	99.891
212	Zimnaya	41.821	0.577	20.171	3.157	7.05	0.349	20.157	5.983	0.061	99.343
232	Zimnaya	41.825	0.038	17.714	8.155	5.966	0.336	24.116	1.725	0	99.875
224	Zimnaya	41.828	0.42	21.179	2.331	8.055	0.321	21.71	4.439	0.036	100.334
242	Zimnaya	41.839	1.039	20.334	1.3	9.549	0.297	20.692	4.563	0.09	99.746
283	Zimnaya	41.863	0.564	20.952	1.926	6.967	0.315	21.509	4.787	0.057	98.942
299	Zimnaya	41.868	0.824	20.64	1.074	8.554	0.234	21.807	4.246	0.066	99.313
290	Zimnaya	41.879	0.549	21.351	2.066	7.009	0.331	22.352	4.117	0.084	99.764
274	Zimnaya	41.881	1.079	20.051	1.727	9.734	0.283	20.384	4.444	0.133	99.716
234	Zimnaya	41.928	0.894	20.573	1.508	8.539	0.28	21.395	4.335	0.099	99.571
257	Zimnaya	41.936	0.087	19.347	4.581	7.415	0.38	20.746	5.061	0.011	99.578
236	Zimnaya	41.939	0.184	18.833	5.872	6.838	0.377	21.293	4.746	0.076	100.159
272	Zimnaya	41.951	0.207	19.646	4.624	7.184	0.32	20.794	5.034	0.053	99.816
233	Zimnaya	41.976	0.981	19.4	3.613	7.884	0.301	21.353	4.741	0.126	100.384
282	Zimnaya	41.978	0.57	19.995	3.188	7.392	0.279	21.666	4.599	0.077	99.772
213	Zimnaya	42.005	0.658	18.924	4.902	7.179	0.298	21.039	5.007	0.098	100.11
266	Zimnaya	42.018	1.075	19.012	3.517	7.832	0.339	21.203	4.923	0.123	100.068
237	Zimnaya	42.037	0.264	19.037	4.941	7.289	0.304	20.908	5.247	0.02	100.054
244	Zimnaya	42.055	0.857	20.7	1.462	8.498	0.262	21.798	4.343	0.066	100.041
269	Zimnaya	42.09	0.9	18.897	3.726	7.74	0.29	21.477	4.903	0.089	100.112
209	Zimnaya	42.128	0.018	17.65	7.887	6.244	0.334	24.551	0.601	0.019	99.454
291	Zimnaya	42.17	0.887	20.625	1.174	9.187	0.266	21.154	4.241	0.089	99.793
229	Zimnaya	42.178	0.135	20.907	3.202	6.785	0.324	21.52	4.4	0.049	99.504
261	Zimnaya	42.191	0.579	20.353	2.78	7.049	0.313	21.381	5.155	0.074	99.875
227	Zimnaya	42.192	0.103	19.373	5.086	6.827	0.358	22.529	3.116	0.022	99.623
262	Zimnaya	42.221	0.408	20.434	3.034	7.007	0.325	21.773	4.098	0.057	99.364
271	Zimnaya	42.23	0.828	20.305	1.235	8.618	0.247	21.26	4.388	0.074	99.185
292	Zimnaya	42.335	0.425	19.511	4.829	6.59	0.283	22.753	3.013	0.041	99.791
211	Zimnaya	42.407	0.5	20.908	2.273	7.09	0.26	22.144	4.098	0.095	99.782
276	Zimnaya	42.435	0.605	22.024	1.147	8.079	0.289	21.754	3.992	0.106	100.431
293	Zimnaya	42.436	0.532	20.909	2.544	6.967	0.298	21.944	4.718	0.084	100.432
284	Zimnaya	42.522	0.587	21.39	1.985	6.973	0.328	21.565	4.95	0.06	100.36
256	Zimnaya	42.628	0.027	19.827	5.167	6.539	0.33	23.267	1.787	0.022	99.599
247	Zimnaya	42.716	0.519	22.299	1.039	6.715	0.277	22.61	3.866	0.088	100.129
222	Zimnaya	43.261	0.497	22.66	0.168	8.765	0.25	21.115	3.994	0.071	100.789
221	Zimnaya	40.002	0.056	15.127	10.771	6.697	0.404	21.361	3.342	0.044	97.83
231	Zimnaya	40.16	0.449	18.157	5.244	9.06	0.342	18.821	5.229	0.035	97.513
233	Zimnaya	40.294	1.287	18.466	3.614	9.71	0.275	19.227	5.078	0.11	98.092
224	Zimnaya	40.33	0.059	21.987	0.35	16.979	0.51	13.313	6.149	0.009	99.692
252	Zimnaya	40.363	0.63	20.665	0.512	14.395	0.518	15.817	5.813	0.094	98.808
177	Zimnaya	40.387	0.226	20.08	3.441	10.327	0.438	18.859	4.552	0.047	98.365
276	Zimnaya	40.426	1.145	17.829	4.219	8.403	0.325	20.043	5.41	0.1	97.931
192	Zimnaya	40.471	0.625	19.356	4.002	7.169	0.323	19.84	5.444	0.095	97.325
200	Zimnaya	40.535	1.234	16.407	6.201	8.217	0.328	19.274	5.943	0.091	98.232
190	Zimnaya	40.54	0.429	17.537	7.243	6.8	0.317	21.492	3.976	0.077	98.43
218	Zimnaya	40.563	1.03	20.42	0.044	13.735	0.378	17.792	4.571	0.104	98.654
181	Zimnaya	40.564	1.395	19.758	0.443	12.274	0.329	18.534	4.744	0.114	98.155
160	Zimnaya	40.592	0.716	18.344	4.813	6.41	0.313	19.788	6.471	0.087	97.534
219	Zimnaya	40.613	0.19	20.617	2.711	12.571	0.439	17.549	4.708	0.066	99.464
235	Zimnaya	40.645	1.092	19.726	1.193	10.033	0.279	19.718	4.591	0.119	97.396
230	Zimnaya	40.656	0.087	17.657	7.433	7.26	0.371	21.431	3.383	0.043	98.344
213	Zimnaya	40.672	0.189	17.685	6.67	6.894	0.346	20.203	5.408	0.011	98.078
220	Zimnaya	40.694	0.535	20.388	2.275	8.969	0.333	20.158	4.354	0.104	97.816
225	Zimnaya	40.695	0	16.062	9.773	6.724	0.342	22.998	1.211	0.043	97.877
268	Zimnaya	40.711	0.584	17.711	5.954	7.443	0.33	20.019	5.269	0.094	98.115
195	Zimnaya	40.77	0.589	20.251	2.718	6.959	0.299	20.976	4.393	0.03	96.986
234	Zimnaya	40.843	0.968	19.949	1.532	9.144	0.28	20.454	4.506	0.112	97.843
227	Zimnaya	40.885	1.004	19.669	1.61	9.208	0.305	20.096	4.535	0.104	97.416
228	Zimnaya	40.89	0.695	19.597	3.462	7.965	0.351	20.364	4.571	0.11	98.005
207	Zimnaya	40.929	0.221	18.317	5.823	7.673	0.292	19.59	5.642	0.032	98.54
272	Zimnaya	40.965	0.595	19.714	3.306	8.284	0.273	20.357	4.829	0.093	98.442
226	Zimnaya	40.971	0.827	20.043	1.781	8.297	0.299	21.17	4.626	0.089	98.103
183	Zimnaya	40.997	0.568	20.015	3.244	7.331	0.369	19.922	6.065	0.098	98.609
222	Zimnaya	41.001	0.472	19.434	4.641	8.679	0.379	19.974	4.497	0.057	99.144
275	Zimnaya	41.013	0.45	20.537	2.342	9.122	0.359	20.18	4.254	0.082	98.341
175	Zimnaya	41.023	1.079	19.712	2.261	9.369	0.277	19.971	4.789	0.065	98.577
237	Zimnaya	41.058	0.972	19.575	2.361	9.567	0.309	20.114	4.881	0.063	98.9
164	Zimnaya	41.059	0.346	20.195	3.261	7.049	0.308	20.83	5.055	0.044	98.159
167	Zimnaya	41.059	0.322	19.155	4.765	7.325	0.313	18.86	6.95	0.037	98.786
273	Zimnaya	41.078	1.381	20.322	0.496	12.174	0.293	18.978	4.689	0.119	99.53
269	Zimnaya	41.081	0.664	19.347	3.779	7.441	0.34	19.447	6.596	0.144	98.861
247	Zimnaya	41.082	0.274	18.748	5.525	6.808	0.285	20.598	5.211	0.028	98.628
212	Zimnaya	41.095	0.923	20.294	1.676	8.512	0.345	20.469	4.757	0.089	98.16
238	Zimnaya	41.099	0.373	20.293	2.242	8.047	0.318	20.464	4.549	0.047	97.451
159	Zimnaya	41.11	0.06	19.966	4.188	7.154	0.386	20.852	4.435	0.056	98.207
161	Zimnaya	41.122	0.393	17.942	6.452	6.474	0.349	20.979	4.731	0.037	98.479
244	Zimnaya	41.126	0.417	18.395	5.486	6.939	0.32	20.881	5.051	0.096	98.717
194	Zimnaya	41.135	0.158	19.595	4.268	7.364	0.266	20.457	4.982	0	98.244
266	Zimnaya	41.142	0.455	18.814	5.18	7.15	0.322	20.824	4.907	0.059	98.893
271	Zimnaya	41.153	0.934	17.751	5.021	8.11	0.276	19.572	5.685	0.052	98.554
191	Zimnaya	41.156	0.508	20.614	2.427	7.569	0.377	20.216	5.315	0.033	98.245
250	Zimnaya	41.157	0.532	19.154	3.308	7.291	0.351	19.796	6.192	0.036	97.817
216	Zimnaya	41.235	0.627	22.541	0.074	9.718	0.281	20.576	3.083	0.127	98.266
176	Zimnaya	41.237	0.776	18.36	5.301	6.991	0.288	20.558	4.902	0.076	98.497
179	Zimnaya	41.263	0.938	20.198	1.624	9.015	0.29	19.886	4.563	0.065	97.875
193	Zimnaya	41.264	0.538	20.347	2.963	8.124	0.38	20.722	4.28	0.078	98.734
178	Zimnaya	41.268	0.908	20.082	1.001	9.707	0.262	20.366	4.451	0.11	98.18
255	Zimnaya	41.271	0.463	20.65	2.847	7.505	0.305	21.205	4.471	0.052	98.801
267	Zimnaya	41.291	1.016	20.253	1.446	9.425	0.291	20.657	4.597	0.079	99.076
249	Zimnaya	41.302	0.394	19.314	4.408	6.691	0.328	20.527	5.216	0.095	98.275
254	Zimnaya	41.325	0.053	17.051	8.608	6.12	0.304	23.286	1.729	0.042	98.554
202	Zimnaya	41.337	0.247	20.668	2.752	10.442	0.407	19.211	4.621	0.061	99.746
180	Zimnaya	41.362	0.924	20.299	1.538	8.972	0.28	20.485	4.488	0.098	98.462
185	Zimnaya	41.366	0.48	21.817	0.26	13.542	0.278	18.264	4.002	0.05	100.059
204	Zimnaya	41.368	0.639	19.44	4.057	7.13	0.322	21.253	4.562	0.056	98.827
196	Zimnaya	41.369	0.378	19.337	4.687	7.078	0.364	21.006	4.418	0.039	98.676
211	Zimnaya	41.374	0.219	19.341	4.934	6.626	0.313	21.886	3.756	0.039	98.501
274	Zimnaya	41.391	0.1	19.912	3.856	8.39	0.326	19.915	5.016	0.014	98.936
214	Zimnaya	41.406	0.561	18.961	4.528	7.892	0.322	20.381	4.623	0.057	98.742
246	Zimnaya	41.417	0.948	20.345	1.042	9.671	0.249	20.581	4.348	0.073	98.686
210	Zimnaya	41.438	0.47	20.294	2.979	7.14	0.33	20.706	4.933	0.055	98.345
270	Zimnaya	41.443	0.417	20.336	2.921	7.488	0.304	21.084	4.56	0.086	98.66
205	Zimnaya	41.457	0.398	20.123	3.738	6.59	0.279	21.911	4.162	0.066	98.748
186	Zimnaya	41.458	0.425	19.208	5.07	7.223	0.331	20.587	5.201	0.059	99.562
182	Zimnaya	41.474	0.553	21.274	1.713	7.235	0.327	21.286	4.666	0.041	98.591
188	Zimnaya	41.512	0.505	20.171	3.257	7.281	0.379	19.564	6.27	0.084	99.023
253	Zimnaya	41.514	0.875	20.543	1.36	8.707	0.253	20.717	4.425	0.105	98.499
243	Zimnaya	41.518	0.822	18.927	4.396	7.573	0.359	20.155	5.29	0.068	99.115
201	Zimnaya	41.527	0.491	21.414	1.164	8.691	0.28	20.807	3.774	0.083	98.231
189	Zimnaya	41.535	0.242	20.975	2.747	6.726	0.339	20.934	4.422	0.041	97.961
223	Zimnaya	41.555	0.918	20.673	0.901	9.718	0.267	20.408	4.277	0.109	98.849
240	Zimnaya	41.575	0.583	20.942	1.419	11.308	0.388	18.779	4.497	0.023	99.516
209	Zimnaya	41.576	0.355	20.713	2.363	8.023	0.327	20.737	4.472	0.053	98.652
232	Zimnaya	41.58	1.055	20.445	0.719	10.955	0.299	19.847	4.489	0.066	99.462
169	Zimnaya	41.586	0.514	19.46	4.142	6.651	0.335	19.209	7.269	0.042	99.208
229	Zimnaya	41.591	0.984	20.317	1.29	9.665	0.275	20.478	4.497	0.082	99.201
241	Zimnaya	41.598	0.198	20.215	4.333	6.014	0.29	19.614	7.578	0.053	99.914
157	Zimnaya	41.613	0.94	20.313	1.358	8.641	0.296	20.764	4.409	0.117	98.451
166	Zimnaya	41.615	0.933	19.526	3.304	8.137	0.312	20.551	5.054	0.073	99.543
165	Zimnaya	41.629	0.565	19.571	4.297	8.095	0.352	20.216	5.138	0.054	99.917
162	Zimnaya	41.641	0.605	20.519	2.878	8.161	0.303	21.216	3.734	0.075	99.175
203	Zimnaya	41.654	0.716	20.319	1.525	8.69	0.277	21.006	4.359	0.067	98.619
168	Zimnaya	41.685	1.031	20.206	1.427	9.624	0.342	20.171	4.611	0.113	99.224
215	Zimnaya	41.693	1.035	20.508	0.912	9.555	0.242	20.653	4.199	0.106	98.903
163	Zimnaya	41.698	0.556	21.064	2.172	7.589	0.344	20.513	5.172	0.116	99.253
173	Zimnaya	41.7	0.447	20.827	2.677	6.919	0.281	21.485	4.254	0.052	98.642
257	Zimnaya	41.707	1	20.115	1.714	8.948	0.242	20.589	4.567	0.078	98.963
170	Zimnaya	41.712	0.458	17.825	6.124	6.638	0.305	20.048	5.889	0.043	99.05
172	Zimnaya	41.713	0.838	21.256	0.573	9.921	0.26	20.318	4.304	0.067	99.267
217	Zimnaya	41.729	0.479	20.727	2.561	7.318	0.316	20.591	5.097	0.055	98.922
184	Zimnaya	41.742	1.068	20.339	1.194	9.709	0.295	20.321	4.685	0.076	99.441
251	Zimnaya	41.752	0.536	21.166	1.827	7.61	0.339	20.383	5.03	0.047	98.695
236	Zimnaya	41.827	0.019	21.955	2.648	7.411	0.4	22.692	1.865	0.003	98.82
197	Zimnaya	41.852	0.38	20.998	2.626	7.327	0.306	21.077	4.249	0.066	98.881
208	Zimnaya	41.856	0.29	19.668	4.434	6.87	0.291	20.945	4.828	0.105	99.287
171	Zimnaya	41.878	0.987	19.874	2.166	9.49	0.286	20.307	4.731	0.074	99.84
245	Zimnaya	41.88	0.325	20.38	3.116	7.012	0.312	21.516	4.391	0.06	98.999
248	Zimnaya	41.903	0.958	21.234	0.268	9.569	0.255	20.607	4.335	0.097	99.226
158	Zimnaya	41.91	0.84	20.444	1.507	9.122	0.25	20.747	4.44	0.084	99.351
198	Zimnaya	41.925	0.892	20.298	1.558	8.991	0.231	20.879	4.53	0.103	99.424
187	Zimnaya	41.941	0.274	20.14	3.301	6.988	0.301	21.098	4.591	0.03	98.726
199	Zimnaya	42.001	0.961	20.254	1.152	9.096	0.261	20.882	4.404	0.086	99.109
206	Zimnaya	42.054	0.873	20.348	1.434	8.889	0.216	20.932	4.636	0.092	99.474
239	Zimnaya	42.071	0.018	21.796	2.645	7.418	0.368	23.03	2.102	0.014	99.473
174	Zimnaya	42.074	0.536	20.793	2.821	6.953	0.3	20.865	4.988	0.052	99.382
242	Zimnaya	42.094	0.954	20.397	1.49	9.274	0.257	20.503	4.539	0.129	99.637
256	Zimnaya	42.174	0.927	20.413	1.623	8.942	0.283	20.897	4.607	0.089	99.988
Vmp	Vimpel	40.7959	0.0693878	14.2959	12.2551	6.28571	0.340816	21.1225	4.5102	0.0510204	99.7265
Vmp	Vimpel	40.7857	0.69898	15.602	9.07143	7.28571	0.37449	18.2245	7.44898	0.15102	99.6429
Vmp	Vimpel	39.8367	0.121429	15.7245	9.45918	6.34694	0.369388	19.8878	6.45918	0.0459184	98.251
Vmp	Vimpel	40.19	0.122	15.64	9.32	6.61	0.334	19.52	6.44	0.034	98.21
Vmp	Vimpel	40.6	0.128	15.7	9.38	6.61	0.421	19.13	6.48	0.043	98.492
Vmp	Vimpel	41.2347	0.144898	16.0306	9.59184	6.54082	0.405102	19.2755	6.58163	0.05	99.8551
Vmp	Vimpel	40.42	0.087	15.71	9.48	6.62	0.335	19.28	6.47	0.028	98.43
Vmp	Vimpel	41.1326	0.119388	16.051	9.42857	6.61224	0.333674	19.4898	6.54082	0.0336735	99.7418
Vmp	Vimpel	41.4898	0.17449	16.0918	9.64286	6.56122	0.345918	18.7755	6.54082	0.0459184	99.6684
Vmp	Vimpel	40.69	1.34	17.05	5.55	7.81	0.35	19.56	5.73	0.117	98.197
Vmp	Vimpel	41.03	1.32	17.17	5.81	7.62	0.352	19.43	5.82	0.107	98.659
Vmp	Vimpel	40.96	0.926	17.31	6.47	6.53	0.351	20.04	5.7	0.102	98.389
Vmp	Vimpel	41.05	0.198	17.53	6.87	7.23	0.338	19.32	6	0.032	98.568
Vmp	Vimpel	41.08	0.162	18.09	5.78	7.16	0.308	19.73	5.82	0.011	98.141
Vmp	Vimpel	40.97	0.446	18.13	5.82	7.01	0.323	20.09	5.46	0.091	98.34
Vmp	Vimpel	40.21	0.684	18.14	5.2	6.79	0.396	19.97	5.42	0.067	96.877
Vmp	Vimpel	40.6	0.847	18.15	4.8	8.25	0.422	18.31	7.05	0.087	98.516
Vmp	Vimpel	40.85	0.662	18.43	5.23	7.31	0.437	19.81	5.74	0.106	98.575
Vmp	Vimpel	41.3775	0.344898	18.8163	5.16326	7.04082	0.331633	20.8878	5.28571	0.05	99.298
Vmp	Vimpel	41.6633	0.347959	18.9082	5.23469	7.14286	0.321429	20.8367	5.33674	0.0897959	99.8816
Vmp	Vimpel	41.28	0.636	18.58	5.29	7.44	0.313	19.56	5.5	0.094	98.693
Vmp	Vimpel	41.6939	0.389796	18.9898	5.44898	6.91837	0.318367	20.3061	5.45918	0.0408163	99.5653
Vmp	Vimpel	41.02	0.284	18.72	5.22	6.94	0.314	20.61	5.19	0.049	98.347
Vmp	Vimpel	41.5816	0.360204	19.1939	5.07143	6.7551	0.345918	21.2449	5.05102	0.0602041	99.6643
Vmp	Vimpel	41.52	0.287	18.89	5.23	6.89	0.316	20.41	5.26	0.033	98.836
Vmp	Vimpel	41.08	0.168	18.97	5.01	7.29	0.387	20.45	5.14	0.054	98.549
Vmp	Vimpel	41.88	0.265	18.99	5.22	7.21	0.332	20.42	5.36	0.046	99.723
Vmp	Vimpel	41.7041	0.40102	19.4286	5.02041	6.61224	0.35102	21.3775	4.9898	0.0581633	99.9429
Vmp	Vimpel	41.62	0.383	19.1	5.02	6.52	0.308	20.78	5.02	0.051	98.802
Vmp	Vimpel	41.27	0.34	19.11	4.8	6.81	0.317	21.07	5	0.075	98.792
Vmp	Vimpel	41.26	0.786	19.13	3.93	6.93	0.338	20.32	5.39	0.11	98.194
Vmp	Vimpel	41.3	0.194	19.13	5.11	6.94	0.415	20.18	5.3	0.058	98.627
Vmp	Vimpel	41.62	0.366	19.18	5.01	6.6	0.383	20.71	4.97	0.081	98.92
Vmp	Vimpel	41.09	0	19.22	5.38	6.9	0.379	20.94	4.07	0.039	98.018
Vmp	Vimpel	42.3163	0.431633	19.7449	4.46939	6.82653	0.321429	20.7959	4.96939	0.104082	99.9796
Vmp	Vimpel	40.85	0.792	19.41	3.42	7.73	0.318	20.53	4.87	0.112	98.032
Vmp	Vimpel	41.6735	0.0397959	19.9388	4.77551	7.38776	0.486735	19.949	5.28571	0.0285714	99.5653
Vmp	Vimpel	41.33	0.39	19.71	4.26	7.14	0.379	20.24	4.76	0.106	98.315
Vmp	Vimpel	41.38	1.14	19.71	2.6	8.28	0.343	20	5.24	0.083	98.776
Vmp	Vimpel	41.8571	0.188776	20.1327	3.59184	8.73469	0.303061	20.2959	4.61224	0.0510204	99.7673
Vmp	Vimpel	41.22	0.135	19.82	3.56	8.55	0.321	19.88	4.51	0.056	98.052
Vmp	Vimpel	41.51	0.442	19.83	3.6	7.28	0.3	20.94	4.67	0.088	98.66
Vmp	Vimpel	41.8265	0.15102	20.2347	3.58163	8.92857	0.32551	20.2245	4.56122	0.044898	99.8786
Vmp	Vimpel	41.41	0.224	19.94	3.54	7.69	0.354	20.24	4.77	0.063	98.231
Vmp	Vimpel	41.31	0.178	19.99	3.63	8.72	0.312	19.54	4.55	0.057	98.287
Vmp	Vimpel	41.53	0.15	20	3.31	8.63	0.347	19.8	4.59	0.053	98.41
Vmp	Vimpel	41.9	0	20.05	4.55	6.99	0.422	22.61	2.12	0.02	98.662
Vmp	Vimpel	41.56	0.146	20.08	3.45	8.71	0.305	19.77	4.54	0.037	98.598
Vmp	Vimpel	41.43	0.867	20.16	2.6	6.75	0.353	21.09	4.74	0.092	98.082
Vmp	Vimpel	41.63	0.563	20.19	3.49	6.7	0.342	20.82	4.81	0.081	98.626
Vmp	Vimpel	41.62	0	20.23	4.41	6.88	0.392	22.24	2.51	0.039	98.321
Vmp	Vimpel	40.76	0.631	20.56	1.24	12.73	0.424	17.37	4.35	0.079	98.144
Vmp	Vimpel	41.2959	0.580612	21.0204	1.10204	12.6122	0.512245	17.5816	4.56122	0.120408	99.3867
Vmp	Vimpel	41.59	0.664	20.74	1.97	7.75	0.342	20.6	4.42	0.06	98.136
Vmp	Vimpel	41.95	0.017	20.79	3.69	7.31	0.471	20.54	4.14	0.035	98.943
Vmp	Vimpel	41.51	0.039	20.89	3.42	7.05	0.455	21.23	3.58	0.064	98.238
Vmp	Vimpel	41.09	0.091	20.9	2.82	7.41	0.376	20.3	5.24	0.061	98.288
Vmp	Vimpel	41.76	0.016	20.92	3.38	7.5	0.449	21.62	3.21	0.032	98.887
Vmp	Vimpel	41.6939	0.0602041	21.3571	3.23469	7.12245	0.447959	21.7959	3.88775	0.0510204	99.651
Vmp	Vimpel	39.81	0.804	20.98	0.059	14.89	0.35	12.4	8.55	0.195	98.038
Vmp	Vimpel	41.14	0	21.05	3.11	7.41	0.466	21.18	3.71	0.042	98.108
Vmp	Vimpel	41.58	0	21.07	3.53	7.12	0.408	22.93	1.43	0.019	98.087
Vmp	Vimpel	41.56	0	21.08	3.19	7.21	0.451	21.53	3.27	0.028	98.319
Vmp	Vimpel	41.95	0.043	21.17	2.8	6.48	0.35	21.61	4.13	0.044	98.577
Vmp	Vimpel	41.89	0.049	21.23	2.98	7.31	0.513	21.45	2.98	0.057	98.459
Vmp	Vimpel	41.65	0	21.38	2.72	7.37	0.437	21.06	3.93	0.033	98.58
Vmp	Vimpel	42.1735	0.0142857	21.8673	2.79592	7.23469	0.454082	21.5714	3.65306	0.022449	99.7867
Vmp	Vimpel	41.95	0	21.53	2.91	7.42	0.44	20.9	3.64	0.026	98.816
Vmp	Vimpel	42.06	0	21.53	2.71	7.71	0.427	21.21	3.71	0.042	99.399
Vmp	Vimpel	42.5612	0	21.9796	2.62245	7.2449	0.393878	21.4796	3.66326	0.0377551	99.9827
Vmp	Vimpel	41.94	0	21.54	2.43	7.51	0.418	21.15	3.58	0.029	98.597
Vmp	Vimpel	41.36	0.172	21.55	1.41	10.06	0.499	18.54	4.61	0.066	98.267
Vmp	Vimpel	40.49	0.306	21.58	0.294	15.11	0.3	16.38	3.47	0.086	98.016
Vmp	Vimpel	41.9694	0.0897959	22.0408	2.26531	7.37755	0.392857	21.5612	4.09184	0.0418367	99.8306
Vmp	Vimpel	42.03	0	21.6	2.72	7.68	0.478	21.17	3.58	0.041	99.299
Vmp	Vimpel	42.44	0	21.66	3.06	7	0.41	23.28	1.53	0.024	99.404
Vmp	Vimpel	41.71	0.005	21.66	2.23	7.39	0.378	20.81	4.23	0.035	98.448
Vmp	Vimpel	41.97	0.004	21.67	2.59	7.62	0.442	21.37	3.53	0.03	99.226
Vmp	Vimpel	41.41	0.028	21.67	2.22	8.08	0.502	21.12	3.23	0.041	98.301
Vmp	Vimpel	41.08	0.081	21.68	1.62	9.82	0.524	18.68	4.68	0.052	98.217
Vmp	Vimpel	42.03	0.426	21.72	1.89	6.14	0.287	21.32	5.11	0.06	98.983
Vmp	Vimpel	41.55	0.108	21.74	2.14	7.29	0.37	21.37	4.06	0.042	98.67
Vmp	Vimpel	41.99	0	21.74	2.32	7.68	0.433	21.45	3.5	0.037	99.15
Vmp	Vimpel	41.44	0	21.81	2.29	7.56	0.392	21.45	3.63	0.019	98.591
Vmp	Vimpel	42.21	0.02	21.87	2.31	7.94	0.616	20.76	3.36	0.038	99.124
Vmp	Vimpel	41.87	0	22	2.15	7.3	0.453	21.65	3.29	0.033	98.746
Vmp	Vimpel	41.8367	0.423469	22.4694	0.29898	9.33673	0.286735	20.3775	4.4898	0.0673469	99.5867
Vmp	Vimpel	42.32	0	22.06	2.11	7.22	0.428	21.64	3.23	0.035	99.043
Vmp	Vimpel	42.3	0.004	22.19	2.25	7.57	0.419	21.56	3.27	0.025	99.588
Vmp	Vimpel	41.54	0.167	22.19	1.04	9.62	0.424	19.29	4.4	0.085	98.756
Vmp	Vimpel	41.91	0.095	22.23	1.55	7.2	0.396	20.98	3.99	0.065	98.416
Vmp	Vimpel	42.2755	6.83674	22.7143	0.882653	9.78571	0.329592	19.602	4.19388	0.0489796	99.901
Vmp	Vimpel	42.13	0.013	22.53	1.99	6.6	0.381	22.83	2.28	0.024	98.778
Vmp	Vimpel	41.88	0.014	22.57	1.42	8.62	0.431	20.94	2.7	0.03	98.605
Vmp	Vimpel	42.46	0.022	23.2	0.623	5.99	0.319	22.51	3.99	0.033	99.147
InKsG00	Inter-Kosmos	40.7959	0.0693878	14.2959	12.2551	6.28571	0.340816	21.1225	4.5102	0.0510204	99.7337
InKsG01	Inter-Kosmos	40.7857	0.69898	15.602	9.07143	7.28571	0.37449	18.2245	7.44898	0.15102	99.6429
InKsG02	Inter-Kosmos	39.8367	0.121429	15.7245	9.45918	6.34694	0.369388	19.8878	6.45918	0.0459184	98.251
InKsG03	Inter-Kosmos	40.19	0.122	15.64	9.32	6.61	0.334	19.52	6.44	0.034	98.21
InKsG04	Inter-Kosmos	40.6	0.128	15.7	9.38	6.61	0.421	19.13	6.48	0.043	98.494
InKsG05	Inter-Kosmos	41.2347	0.144898	16.0306	9.59184	6.54082	0.405102	19.2755	6.58163	0.05	99.8551
InKsG06	Inter-Kosmos	40.42	0.087	15.71	9.48	6.62	0.335	19.28	6.47	0.028	98.43
InKsG07	Inter-Kosmos	41.1326	0.119388	16.051	9.42857	6.61224	0.333674	19.4898	6.54082	0.0336735	99.7469
InKsG08	Inter-Kosmos	41.4898	0.17449	16.0918	9.64286	6.56122	0.345918	18.7755	6.54082	0.0459184	99.6684
InKsG09	Inter-Kosmos	40.69	1.34	17.05	5.55	7.81	0.35	19.56	5.73	0.117	98.199
InKsG10	Inter-Kosmos	41.03	1.32	17.17	5.81	7.62	0.352	19.43	5.82	0.107	98.664
InKsG11	Inter-Kosmos	40.96	0.926	17.31	6.47	6.53	0.351	20.04	5.7	0.102	98.395
InKsG12	Inter-Kosmos	41.05	0.198	17.53	6.87	7.23	0.338	19.32	6	0.032	98.568
InKsG13	Inter-Kosmos	41.08	0.162	18.09	5.78	7.16	0.308	19.73	5.82	0.011	98.141
InKsG14	Inter-Kosmos	40.97	0.446	18.13	5.82	7.01	0.323	20.09	5.46	0.091	98.344
InKsG15	Inter-Kosmos	40.21	0.684	18.14	5.2	6.79	0.396	19.97	5.42	0.067	96.877
InKsG16	Inter-Kosmos	40.6	0.847	18.15	4.8	8.25	0.422	18.31	7.05	0.087	98.516
InKsG17	Inter-Kosmos	40.85	0.662	18.43	5.23	7.31	0.437	19.81	5.74	0.106	98.58
InKsG18	Inter-Kosmos	41.3775	0.344898	18.8163	5.16326	7.04082	0.331633	20.8878	5.28571	0.05	99.298
InKsG19	Inter-Kosmos	41.6633	0.347959	18.9082	5.23469	7.14286	0.321429	20.8367	5.33674	0.0897959	99.8826
InKsG20	Inter-Kosmos	41.28	0.636	18.58	5.29	7.44	0.313	19.56	5.5	0.094	98.693
InKsG21	Inter-Kosmos	41.6939	0.389796	18.9898	5.44898	6.91837	0.318367	20.3061	5.45918	0.0408163	99.5653
InKsG22	Inter-Kosmos	41.02	0.284	18.72	5.22	6.94	0.314	20.61	5.19	0.049	98.347
InKsG23	Inter-Kosmos	41.5816	0.360204	19.1939	5.07143	6.7551	0.345918	21.2449	5.05102	0.0602041	99.6643
InKsG24	Inter-Kosmos	41.52	0.287	18.89	5.23	6.89	0.316	20.41	5.26	0.033	98.847
InKsG25	Inter-Kosmos	41.08	0.168	18.97	5.01	7.29	0.387	20.45	5.14	0.054	98.549
InKsG26	Inter-Kosmos	41.88	0.265	18.99	5.22	7.21	0.332	20.42	5.36	0.046	99.73
InKsG27	Inter-Kosmos	41.7041	0.40102	19.4286	5.02041	6.61224	0.35102	21.3775	4.9898	0.0581633	99.9429
InKsG28	Inter-Kosmos	41.62	0.383	19.1	5.02	6.52	0.308	20.78	5.02	0.051	98.802
InKsG29	Inter-Kosmos	41.27	0.34	19.11	4.8	6.81	0.317	21.07	5	0.075	98.792
InKsG30	Inter-Kosmos	41.26	0.786	19.13	3.93	6.93	0.338	20.32	5.39	0.11	98.197
InKsG31	Inter-Kosmos	41.3	0.194	19.13	5.11	6.94	0.415	20.18	5.3	0.058	98.631
InKsG32	Inter-Kosmos	41.62	0.366	19.18	5.01	6.6	0.383	20.71	4.97	0.081	98.921
InKsG33	Inter-Kosmos	41.09	0	19.22	5.38	6.9	0.379	20.94	4.07	0.039	98.018
InKsG34	Inter-Kosmos	42.3163	0.431633	19.7449	4.46939	6.82653	0.321429	20.7959	4.96939	0.104082	99.9837
InKsG35	Inter-Kosmos	40.85	0.792	19.41	3.42	7.73	0.318	20.53	4.87	0.112	98.039
InKsG36	Inter-Kosmos	41.6735	0.0397959	19.9388	4.77551	7.38776	0.486735	19.949	5.28571	0.0285714	99.5653
InKsG37	Inter-Kosmos	41.33	0.39	19.71	4.26	7.14	0.379	20.24	4.76	0.106	98.332
InKsG38	Inter-Kosmos	41.38	1.14	19.71	2.6	8.28	0.343	20	5.24	0.083	98.777
InKsG39	Inter-Kosmos	41.8571	0.188776	20.1327	3.59184	8.73469	0.303061	20.2959	4.61224	0.0510204	99.7673
InKsG40	Inter-Kosmos	41.22	0.135	19.82	3.56	8.55	0.321	19.88	4.51	0.056	98.054
InKsG41	Inter-Kosmos	41.51	0.442	19.83	3.6	7.28	0.3	20.94	4.67	0.088	98.661
InKsG42	Inter-Kosmos	41.8265	0.15102	20.2347	3.58163	8.92857	0.32551	20.2245	4.56122	0.044898	99.8796
InKsG43	Inter-Kosmos	41.41	0.224	19.94	3.54	7.69	0.354	20.24	4.77	0.063	98.237
InKsG44	Inter-Kosmos	41.31	0.178	19.99	3.63	8.72	0.312	19.54	4.55	0.057	98.287
InKsG45	Inter-Kosmos	41.53	0.15	20	3.31	8.63	0.347	19.8	4.59	0.053	98.41
InKsG46	Inter-Kosmos	41.9	0	20.05	4.55	6.99	0.422	22.61	2.12	0.02	98.662
InKsG47	Inter-Kosmos	41.56	0.146	20.08	3.45	8.71	0.305	19.77	4.54	0.037	98.599
InKsG48	Inter-Kosmos	41.43	0.867	20.16	2.6	6.75	0.353	21.09	4.74	0.092	98.082
InKsG49	Inter-Kosmos	41.63	0.563	20.19	3.49	6.7	0.342	20.82	4.81	0.081	98.63
InKsG50	Inter-Kosmos	41.62	0	20.23	4.41	6.88	0.392	22.24	2.51	0.039	98.321
InKsG51	Inter-Kosmos	40.76	0.631	20.56	1.24	12.73	0.424	17.37	4.35	0.079	98.144
InKsG52	Inter-Kosmos	41.2959	0.580612	21.0204	1.10204	12.6122	0.512245	17.5816	4.56122	0.120408	99.3867
InKsG53	Inter-Kosmos	41.59	0.664	20.74	1.97	7.75	0.342	20.6	4.42	0.06	98.149
InKsG54	Inter-Kosmos	41.95	0.017	20.79	3.69	7.31	0.471	20.54	4.14	0.035	98.943
InKsG55	Inter-Kosmos	41.51	0.039	20.89	3.42	7.05	0.455	21.23	3.58	0.064	98.238
InKsG56	Inter-Kosmos	41.09	0.091	20.9	2.82	7.41	0.376	20.3	5.24	0.061	98.293
InKsG57	Inter-Kosmos	41.76	0.016	20.92	3.38	7.5	0.449	21.62	3.21	0.032	98.887
InKsG58	Inter-Kosmos	41.6939	0.0602041	21.3571	3.23469	7.12245	0.447959	21.7959	3.88775	0.0510204	99.651
InKsG59	Inter-Kosmos	39.81	0.804	20.98	0.059	14.89	0.35	12.4	8.55	0.195	98.038
InKsG60	Inter-Kosmos	41.14	0	21.05	3.11	7.41	0.466	21.18	3.71	0.042	98.108
InKsG61	Inter-Kosmos	41.58	0	21.07	3.53	7.12	0.408	22.93	1.43	0.019	98.087
InKsG62	Inter-Kosmos	41.56	0	21.08	3.19	7.21	0.451	21.53	3.27	0.028	98.319
InKsG63	Inter-Kosmos	41.95	0.043	21.17	2.8	6.48	0.35	21.61	4.13	0.044	98.577
InKsG64	Inter-Kosmos	41.89	0.049	21.23	2.98	7.31	0.513	21.45	2.98	0.057	98.459
InKsG65	Inter-Kosmos	41.65	0	21.38	2.72	7.37	0.437	21.06	3.93	0.033	98.58
InKsG66	Inter-Kosmos	42.1735	0.0142857	21.8673	2.79592	7.23469	0.454082	21.5714	3.65306	0.022449	99.7867
InKsG67	Inter-Kosmos	41.95	0	21.53	2.91	7.42	0.44	20.9	3.64	0.026	98.816
InKsG68	Inter-Kosmos	42.06	0	21.53	2.71	7.71	0.427	21.21	3.71	0.042	99.4
InKsG69	Inter-Kosmos	42.5612	0	21.9796	2.62245	7.2449	0.393878	21.4796	3.66326	0.0377551	99.9827
InKsG70	Inter-Kosmos	41.94	0	21.54	2.43	7.51	0.418	21.15	3.58	0.029	98.604
InKsG71	Inter-Kosmos	41.36	0.172	21.55	1.41	10.06	0.499	18.54	4.61	0.066	98.267
InKsG72	Inter-Kosmos	40.49	0.306	21.58	0.294	15.11	0.3	16.38	3.47	0.086	98.034
InKsG73	Inter-Kosmos	41.9694	0.0897959	22.0408	2.26531	7.37755	0.392857	21.5612	4.09184	0.0418367	99.8306
InKsG74	Inter-Kosmos	42.03	0	21.6	2.72	7.68	0.478	21.17	3.58	0.041	99.306
InKsG75	Inter-Kosmos	42.44	0	21.66	3.06	7	0.41	23.28	1.53	0.024	99.406
InKsG76	Inter-Kosmos	41.71	0.005	21.66	2.23	7.39	0.378	20.81	4.23	0.035	98.448
InKsG77	Inter-Kosmos	41.97	0.004	21.67	2.59	7.62	0.442	21.37	3.53	0.03	99.226
InKsG78	Inter-Kosmos	41.41	0.028	21.67	2.22	8.08	0.502	21.12	3.23	0.041	98.301
InKsG79	Inter-Kosmos	41.08	0.081	21.68	1.62	9.82	0.524	18.68	4.68	0.052	98.226
InKsG80	Inter-Kosmos	42.03	0.426	21.72	1.89	6.14	0.287	21.32	5.11	0.06	98.983
InKsG81	Inter-Kosmos	41.55	0.108	21.74	2.14	7.29	0.37	21.37	4.06	0.042	98.67
InKsG82	Inter-Kosmos	41.99	0	21.74	2.32	7.68	0.433	21.45	3.5	0.037	99.15
InKsG83	Inter-Kosmos	41.44	0	21.81	2.29	7.56	0.392	21.45	3.63	0.019	98.595
InKsG84	Inter-Kosmos	42.21	0.02	21.87	2.31	7.94	0.616	20.76	3.36	0.038	99.124
InKsG85	Inter-Kosmos	41.87	0	22	2.15	7.3	0.453	21.65	3.29	0.033	98.746
InKsG86	Inter-Kosmos	41.8367	0.423469	22.4694	0.29898	9.33673	0.286735	20.3775	4.4898	0.0673469	99.5867
InKsG87	Inter-Kosmos	42.32	0	22.06	2.11	7.22	0.428	21.64	3.23	0.035	99.048
InKsG88	Inter-Kosmos	42.3	0.004	22.19	2.25	7.57	0.419	21.56	3.27	0.025	99.592
InKsG89	Inter-Kosmos	41.54	0.167	22.19	1.04	9.62	0.424	19.29	4.4	0.085	98.756
InKsG90	Inter-Kosmos	41.91	0.095	22.23	1.55	7.2	0.396	20.98	3.99	0.065	98.417
InKsG91	Inter-Kosmos	42.2755	0.0683673	22.7143	0.882653	9.78571	0.329592	19.602	4.19388	0.0489796	99.901
InKsG92	Inter-Kosmos	42.13	0.013	22.53	1.99	6.6	0.381	22.83	2.28	0.024	98.778
InKsG93	Inter-Kosmos	41.88	0.014	22.57	1.42	8.62	0.431	20.94	2.7	0.03	98.605
InKsG94	Inter-Kosmos	42.46	0.022	23.2	0.623	5.99	0.319	22.51	3.99	0.033	99.147
InKsG96	Inter-Kosmos	42.52	0	22.66	1.46	6.61	0.291	24.45	0.595	0	98.586
InKsG97	Inter-Kosmos	40.89	0.063	22.53	0.218	11.38	0.561	17.7	4.82	0.043	98.205
InKsG98	Inter-Kosmos	41.6	0.162	22.3	0.78	10.78	0.372	18.79	4.36	0.061	99.205
InKsG99	Inter-Kosmos	41.99	0.099	22.05	1.73	7.71	0.349	21.33	3.96	0.021	99.239
InKsG100	Inter-Kosmos	41.57	0.058	22.04	1.39	9.54	0.426	19.34	4.33	0.049	98.743
InKsG101	Inter-Kosmos	41.05	0.141	21.97	0.801	12.46	0.419	16.85	5.24	0.031	98.962
InKsG102	Inter-Kosmos	41.34	0.136	21.96	1.06	9.96	0.394	19.27	4.33	0.037	98.49
InKsG103	Inter-Kosmos	41.24	0.126	21.94	1.38	10.59	0.49	18.6	4.57	0.05	98.986
InKsG104	Inter-Kosmos	42.2	0	21.93	2.23	7.65	0.399	21.53	3.31	0.019	99.268
InKsG105	Inter-Kosmos	42.12	0.088	21.86	2.13	6.86	0.36	20.82	3.8	0.041	98.079
InKsG106	Inter-Kosmos	42.34	0	21.82	2.3	7.38	0.407	22.38	2.19	0.024	98.844
InKsG107	Inter-Kosmos	42.03	0	21.75	2.26	7.48	0.434	21.7	3.23	0.032	98.916
InKsG108	Inter-Kosmos	41.85	0.003	21.75	2.37	7.8	0.415	21.35	3.59	0.028	99.163
InKsG109	Inter-Kosmos	41.75	0.106	21.67	2.06	8.96	0.436	19.45	4.66	0.036	99.128
InKsG110	Inter-Kosmos	41	0.113	21.63	1.37	9.68	0.449	19.22	4.51	0.274	98.248
InKsG111	Inter-Kosmos	41.65	0	21.6	2.28	7.71	0.438	21.39	3.44	0.047	98.555
InKsG112	Inter-Kosmos	40.3	0.275	21.59	0.304	18.3	0.371	13.77	4.26	0.155	99.325
InKsG113	Inter-Kosmos	42.2245	0.0561224	22.0306	1.36735	8.85714	0.442857	19.8265	4.17347	0.05	99.0337
InKsG114	Inter-Kosmos	42.31	0	21.53	2.52	7.27	0.39	22.46	2.29	0.05	98.82
InKsG115	Inter-Kosmos	42.5714	0.0234694	21.9286	2.34694	6.95918	0.405102	21.5714	3.44898	0.0204082	99.2755
InKsG116	Inter-Kosmos	42.06	0	21.42	2.6	7.66	0.47	20.85	3.55	0.034	98.644
InKsG117	Inter-Kosmos	41.83	0	21.26	2.52	7.62	0.42	21.22	3.45	0.023	98.343
InKsG118	Inter-Kosmos	42.3571	0	21.6735	2.52041	6.92857	0.469388	21.8673	3.13265	0.0387755	98.9898
InKsG119	Inter-Kosmos	42.1	0.004	21.12	3.01	7.42	0.444	22.45	2.01	0.035	98.593
InKsG120	Inter-Kosmos	41.56	0.691	21.03	0.579	11.48	0.458	17.51	5.45	0.101	98.86
InKsG121	Inter-Kosmos	41.75	0.405	20.84	2.74	7.22	0.343	21.21	4.39	0.094	98.992
InKsG122	Inter-Kosmos	41.83	0	20.64	3.88	7.86	0.521	21.38	3.19	0.02	99.321
InKsG123	Inter-Kosmos	41.29	0	20.41	3.64	7.99	0.552	20.55	3.83	0.03	98.292
InKsG124	Inter-Kosmos	41.8469	0.646939	20.8163	1.65306	8.55102	0.344898	20.8265	4.42857	0.22551	99.5531
InKsG125	Inter-Kosmos	41.04	1.08	20.33	0.044	12.5	0.339	18.51	4.38	0.106	98.329
InKsG126	Inter-Kosmos	41.16	1.09	20.32	0.089	12.54	0.333	18.87	4.39	0.117	98.909
InKsG127	Inter-Kosmos	42.4184	0.636735	20.5918	2.54082	6.60204	0.330612	21.7245	4.57143	0.0591837	99.4775
InKsG128	Inter-Kosmos	41.69	0.47	20.1	3.42	6.53	0.299	18.37	8.84	0.087	99.808
InKsG129	Inter-Kosmos	40.7449	0.608163	20.4388	0.732653	13.5102	0.555102	16.3367	5.52041	0.136735	98.65
InKsG130	Inter-Kosmos	41.24	0.136	19.99	3.55	9.42	0.344	19.76	4.59	0.038	99.082
InKsG131	Inter-Kosmos	42.5612	0.630612	20.3367	3.14286	6.64286	0.336735	21.3673	4.28571	0.128571	99.4327
InKsG132	Inter-Kosmos	42.3367	0.132653	20.1939	3.33674	8.46939	0.37449	20.1633	4.35714	0.0744898	99.4408
InKsG133	Inter-Kosmos	42.5204	0.143878	19.6633	4.73469	7.12245	0.347959	20.6633	5.5	0.0581633	100.761
InKsG134	Inter-Kosmos	41.04	0.819	19.24	3.59	7.77	0.345	20.13	5.02	0.096	98.059
InKsG135	Inter-Kosmos	42.1225	0.141837	19.5204	4.54082	6.41837	0.338776	20.9796	4.84694	0.0285714	98.9377
InKsG136	Inter-Kosmos	41.36	0.393	18.95	4.93	6.77	0.333	20.64	4.85	0.084	98.31
InKsG137	Inter-Kosmos	41.64	0.39	18.84	5.2	7.37	0.348	20.1	5.26	0.066	99.215
InKsG138	Inter-Kosmos	41.09	0.766	18.79	4.45	7.04	0.31	20.26	5.52	0.133	98.365
InKsG139	Inter-Kosmos	42.1531	0.268367	19.051	4.91837	6.66326	0.357143	20.6939	4.91837	0.0561224	99.0796
InKsG140	Inter-Kosmos	41.43	0.33	18.61	5.29	7.23	0.401	20.14	5.24	0.068	98.739
InKsG141	Inter-Kosmos	41.46	0.243	18.59	5.17	7.36	0.303	20.37	5.22	0.075	98.791
InKsG142	Inter-Kosmos	41.06	0.245	18.54	5.2	7.49	0.286	20.22	5.25	0.054	98.345
InKsG143	Inter-Kosmos	42.2245	0.183673	18.5714	6.09184	6.38776	0.312245	20.7347	4.94898	0.0581633	99.5235
InKsG144	Inter-Kosmos	42.4094	1.15577	18.3153	4.73761	7.16368	0.327988	20.5956	5.49771	0.110371	100.313
InKsG145	Inter-Kosmos	40.78	0.129	15.73	9.45	6.86	0.347	18.96	6.47	0.036	98.762
InKsG146	Inter-Kosmos	40.48	0.133	15.66	9.53	6.8	0.399	19.07	6.4	0.051	98.524
InKsG147	Inter-Kosmos	41.3367	0.119388	15.9796	9.23469	6.31633	0.329592	19.3775	6.33674	0.0408163	99.0714
InKsG148	Inter-Kosmos	40.64	0.119	15.59	9.44	6.72	0.326	18.94	6.42	0.052	98.247
InKsG149	Inter-Kosmos	40.32	0.151	15.54	9.43	6.73	0.358	19.28	6.45	0.061	98.322
InKsG150	Inter-Kosmos	41.1326	0.111225	15.7857	8.9898	6.23469	0.356122	19.5408	6.20408	0.0469388	98.4061
InKsG151	Inter-Kosmos	40.56	1.28	15.43	7.79	7.81	0.393	18.78	6.54	0.092	98.675
InKsG152	Inter-Kosmos	39.9184	0.142857	15.449	9.61224	7.08163	0.336735	19.051	6.60204	0.0428571	98.2367
InKsG153	Inter-Kosmos	47.0521	0.410417	11.9062	0.514583	3.3125	0.0375	19.7292	11.5833	3.66667	99.4938
96	Debut	42.288	0.043	18.348	6.957	7.325	0.442	21.632	3.727	0.057	100.829
97	Debut	42.315	0.053	18.944	6.404	7.305	0.428	22.001	3.227	0.006	100.683
98	Debut	40.46	0	22.276	0.203	16.723	0.184	14.063	6.294	0.023	100.226
99	Debut	41.65	0.189	18.941	5.438	8.334	0.449	19.461	6.014	0.006	100.505
100	Debut	39.609	0.101	21.698	0.075	24.149	0.396	9.53	5.729	0.025	101.312
101	Debut	39.706	0.078	22.007	0.093	23.555	0.679	10.087	5.048	0.121	101.374
102	Debut	41.538	0.081	19.094	5.952	7.608	0.43	19.8	5.769	0.003	100.275
103	Debut	41.06	0.259	16.619	8.718	8.175	0.504	20.3	4.559	0.08	100.274
104	Debut	40.771	0.567	13.907	10.246	7.365	0.361	19.632	6.339	0	99.19
105	Debut	41.164	0.487	20.284	2.93	9.602	0.382	20.103	4.503	0.078	99.545
106	Debut	37.943	0.176	21.065	0.024	26.761	0.914	6.522	6.056	0	99.479
107	Debut	41.526	0.165	18.958	5.419	8.216	0.481	19.167	5.849	0.063	99.844
108	Debut	41.684	0.074	16.262	9.615	7.317	0.463	22.95	2.006	0.039	100.41
109	Debut	42.674	0	21.188	3.327	6.689	0.401	24.637	0.874	0.025	99.821
110	Debut	42.15	1.024	20.389	1.126	9.951	0.304	20.626	4.298	0.118	100.003
111	Debut	42.638	0.03	21.69	2.594	5.453	0.32	23.593	3.201	0.033	99.581
112	Debut	42.731	0.915	19.848	1.638	8.571	0.269	21.232	4.618	0.157	99.991
113	Debut	41.832	0.117	18.311	6.637	7.674	0.488	19.61	5.71	0.009	100.39
114	Debut	41.876	0	19.858	4.664	7.746	0.446	20.018	5.126	0.012	99.779
115	Debut	41.949	0.057	18.333	7.073	7.437	0.477	21.546	3.388	0	100.26
116	Debut	42.119	0.079	19.02	5.963	7.692	0.463	20.029	5.471	0.048	100.884
117	Debut	42.291	0.001	17.827	7.69	7.328	0.454	22.777	2.003	0.057	100.444
118	Debut	42.225	0.386	21.272	1.844	8.472	0.383	21.067	4.459	0.073	100.207
119	Debut	40.057	0.056	22.302	0.06	22.682	0.391	10.527	5.41	0.046	101.531
120	Debut	41.061	0.012	22.563	0.2	16.757	0.168	14.51	5.608	0	100.879
121	Debut	39.902	0.106	21.779	0.038	23.106	0.447	10.038	5.723	0.057	101.196
122	Debut	41.145	0.08	22.631	0.07	18.998	0.399	11.838	6.696	0.054	101.911
123	Debut	41.476	0.122	20.758	3.513	7.265	0.44	20.44	5.213	0.038	99.29
124	Debut	39.809	0.134	21.867	0.081	23.533	0.501	9.799	5.62	0.011	101.355
125	Debut	41.747	0.034	18.833	6.206	7.377	0.52	20.062	5.446	0	100.225
126	Debut	41.403	1.032	16.844	6.251	7.473	0.362	20.582	5.504	0.057	99.508
127	Debut	41.888	0.089	18.19	6.69	7.136	0.374	21.111	4.747	0	100.225
128	Debut	42.074	0.214	18.869	5.479	7.484	0.397	21.007	4.447	0.044	100.017
129	Debut	41.112	0.167	22.565	0.202	16.392	0.439	16.285	3.971	0	101.137
130	Debut	39.997	0.114	21.43	0.087	23.738	0.487	9.627	5.596	0.043	101.119
131	Debut	42.556	0.65	20.376	2.145	8.331	0.326	21.241	4.288	0.076	100.002
132	Debut	41.754	0.025	18.733	6.325	7.279	0.474	21.882	3.283	0.05	99.805
133	Debut	42.176	0.133	20.198	3.954	8.284	0.462	19.968	5.124	0.039	100.338
134	Debut	42.253	0.755	20.031	1.698	8.483	0.257	21.389	4.238	0.09	99.194
135	Debut	41.806	0.131	20.238	3.945	8.381	0.484	20.098	5.091	0.053	100.227
136	Debut	40.032	0.045	21.815	0.021	22.863	0.44	9.721	6.329	0.067	101.333
137	Debut	42.37	0.16	20.226	3.776	8.395	0.44	20.416	4.915	0.003	100.701
138	Debut	41.65	0.197	18.696	5.912	7.422	0.45	19.73	5.627	0.126	99.82
139	Debut	41.824	0.266	18.791	5.182	7.326	0.344	21.081	4.39	0.05	99.254
140	Debut	40.938	0.2	15.555	9.401	7.947	0.511	18.26	7.078	0.072	99.969
141	Debut	41.269	1.239	16.523	6.357	7.706	0.331	20.395	5.752	0.088	99.66
142	Debut	40.877	0.116	18.084	7.063	7.43	0.442	20.627	4.554	0.045	99.248
143	Debut	39.843	0.247	15.564	9.368	7.57	0.483	17.85	7.176	0.044	98.145
144	Debut	41.606	0.119	20.329	3.615	8.266	0.467	19.97	4.891	0.041	99.304
145	Debut	41.522	0.105	17.334	7.91	7.556	0.47	20.359	4.464	0.015	99.735
146	Debut	41.924	0.985	17.888	4.984	7.675	0.32	20.682	5.601	0.137	100.196
147	Debut	42.455	0.833	19.295	2.404	8.215	0.275	21.56	4.598	0.047	99.682
148	Debut	42.717	0.846	19.379	2.415	8.26	0.253	21.782	4.596	0.085	100.364
149	Debut	41.778	0.794	17.26	6.188	7.822	0.412	20.341	5.536	0.057	100.22
150	Debut	40.675	0.083	15.738	10.093	7.155	0.512	19.385	5.79	0.087	99.518
151	Debut	41.771	0.983	17.349	5.357	7.731	0.354	20.48	5.684	0.051	99.784
152	Debut	41.833	0.058	18.469	6.704	7.756	0.481	20.458	4.296	0.027	100.091
153	Debut	41.8	1.026	16.379	6.86	7.4	0.337	20.262	5.818	0.079	99.976
154	Debut	41.346	0.146	17.591	7.167	7.426	0.426	19.498	6.148	0.043	99.791
155	Debut	40.998	0.263	13.72	11.479	7.124	0.401	19.255	6.828	0.038	100.106
156	Debut	41.221	0.073	17.388	7.591	7.425	0.487	19.388	6.1	0	99.68
157	Debut	41.307	1.012	16.134	6.985	7.532	0.332	20.211	5.742	0.079	99.337
158	Debut	42.258	0.185	17.626	6.367	7.357	0.344	20.502	5.827	0.024	100.49
159	Debut	42.08	0.903	16.263	6.839	7.602	0.294	20.215	5.96	0.067	100.254
160	Debut	41.785	0.818	16.175	7.307	7.211	0.366	19.927	6.05	0.067	99.736
161	Debut	42.096	0.106	17.615	7.584	7.329	0.491	19.744	6.054	0	101.019
162	Debut	42.163	0.067	18.797	5.91	7.979	0.486	19.788	5.736	0.027	101.016
163	Debut	40.864	0.014	22.632	0.26	16.715	0.176	14.792	5.113	0	100.566
164	Debut	42.151	0.916	17.787	4.965	7.652	0.355	20.876	5.366	0.003	100.125
165	Debut	41.353	0.13	17.456	7.497	7.334	0.482	19.354	6.06	0.043	99.709
166	Debut	41.083	0.06	17.443	7.552	7.354	0.449	19.58	6.189	0.067	99.789
167	Debut	41.167	0.174	18.952	5.332	8.255	0.43	19.116	5.852	0.015	99.293
168	Debut	41.149	0.171	17.654	7.308	7.469	0.486	19.535	6.121	0.006	99.903
169	Debut	39.154	0.026	21.253	0	27.462	0.454	7.497	5.04	0.056	100.962
170	Debut	41.413	1.047	15.714	6.976	7.683	0.327	20.235	5.958	0.024	99.396
171	Debut	42.533	0.21	21.402	2.086	8.285	0.397	21.417	3.817	0.084	100.231
8	325 let Yakutii	42.365	0	22.272	2.053	7.323	0.389	22.858	2.109	0.048	99.417
14	325 let Yakutii	41.977	0	21.133	3.531	7.886	0.477	22.049	3.023	0.047	100.189
26	325 let Yakutii	42.205	0	21.555	2.598	7.634	0.477	20.922	3.783	0.027	99.219
29	325 let Yakutii	42.157	0	22.622	1.222	6.581	0.416	20.789	5.07	0.005	98.88
35	325 let Yakutii	41.707	0	17.151	8.393	7.074	0.36	22.249	2.267	0.009	99.236
40	325 let Yakutii	42.599	0	20.979	3.626	7.711	0.384	22.492	2.27	0.019	100.099
46	325 let Yakutii	42.347	0	21.791	2.696	7.943	0.428	21.311	3.788	0.008	100.314
48	325 let Yakutii	42.682	0	21.985	2.511	7.252	0.392	22.332	3.362	0.049	100.606
51	325 let Yakutii	42.513	0	22.047	2.41	7.308	0.372	23.499	1.243	0	99.395
63	325 let Yakutii	42.122	0	21.572	2.732	7.797	0.513	20.385	4.485	0.036	99.642
67	325 let Yakutii	42.083	0	21.569	2.29	7.581	0.389	20.96	4.693	0.016	99.581
72	325 let Yakutii	41.585	0	17.387	8.557	7.002	0.381	22.252	2.213	0.003	99.398
94	325 let Yakutii	42.089	0	21.199	3.224	7.479	0.407	22.609	2.226	0.011	99.244
102	325 let Yakutii	41.715	0	17.17	8.469	7.019	0.409	22.499	2.247	0.046	99.574
105	325 let Yakutii	41.709	0	21.885	2.31	7.697	0.41	21.525	3.089	0.057	98.682
123	325 let Yakutii	41.844	0	21.57	2.361	7.644	0.427	22.225	2.282	0.035	98.388
139	325 let Yakutii	41.735	0	20.084	4.49	7.986	0.455	20.251	4.611	0.017	99.675
149	325 let Yakutii	41.793	0	21.001	3.743	7.725	0.42	21.681	2.907	0.008	99.291
16	325 let Yakutii	42.19	0.001	21.039	3.693	7.63	0.449	21.725	2.613	0	99.34
116	325 let Yakutii	41.922	0.002	20.685	3.933	8.016	0.496	21.257	3.504	0	99.819
140	325 let Yakutii	41.991	0.002	21.925	2.136	7.466	0.334	21.5	3.074	0.014	98.497
101	325 let Yakutii	42.773	0.006	22.612	1.579	7.214	0.356	23.266	1.523	0.024	99.353
90	325 let Yakutii	41.771	0.007	17.217	8.382	7.044	0.382	22.364	2.229	0.046	99.461
30	325 let Yakutii	41.699	0.008	20.884	3.641	7.736	0.425	21.546	2.829	0.028	98.796
113	325 let Yakutii	41.614	0.008	21.482	2.639	8.939	0.412	19.613	5.169	0.028	99.904
24	325 let Yakutii	41.311	0.01	17.292	8.076	6.574	0.364	22.269	3.043	0.045	98.984
148	325 let Yakutii	40.921	0.012	17.312	8.415	7.139	0.364	22.487	2.296	0	98.976
60	325 let Yakutii	41.591	0.013	20.386	4.406	7.8	0.46	20.332	4.506	0.042	99.543
41	325 let Yakutii	42.151	0.014	21.292	3.172	7.832	0.44	21.061	3.814	0	99.776
44	325 let Yakutii	41.744	0.014	20.625	3.635	7.937	0.503	21.061	3.717	0.022	99.258
55	325 let Yakutii	41.836	0.014	20.322	4.266	8.03	0.457	21.009	3.737	0.006	99.677
52	325 let Yakutii	42.377	0.015	22.055	2.152	7.448	0.343	21.264	4.153	0	99.813
76	325 let Yakutii	41.834	0.015	20.902	3.517	7.808	0.436	21.123	3.551	0.033	99.245
54	325 let Yakutii	42.218	0.016	21.816	2.412	7.714	0.396	21.81	2.914	0.014	99.31
134	325 let Yakutii	42.185	0.016	20.716	3.69	7.808	0.479	21.629	3.08	0.064	99.693
47	325 let Yakutii	42.121	0.018	21.037	3.566	7.844	0.472	22.094	2.4	0.011	99.563
138	325 let Yakutii	42.045	0.018	22.402	2.079	7.616	0.381	23.101	2.01	0	99.652
130	325 let Yakutii	42.149	0.019	21.535	2.724	7.562	0.427	20.683	4.819	0	99.918
83	325 let Yakutii	42.162	0.02	21.701	2.653	7.392	0.488	20.37	5.098	0.014	99.898
106	325 let Yakutii	41.346	0.021	20.338	3.821	7.762	0.506	20.647	4.223	0.048	98.712
129	325 let Yakutii	42.206	0.021	21.487	3.291	7.68	0.433	22.237	2.505	0	99.882
78	325 let Yakutii	41.908	0.025	16.638	9.38	6.922	0.378	23.102	1.48	0.032	99.894
75	325 let Yakutii	40.962	0.027	22.161	0.205	15.359	0.348	15.846	5.08	0.018	100.028
13	325 let Yakutii	41.3	0.03	21.18	3.235	7.881	0.433	20.727	4.049	0.033	98.868
61	325 let Yakutii	42.273	0.03	21.371	3.004	7.708	0.366	21.682	3.347	0	99.811
86	325 let Yakutii	42.304	0.03	21.235	3.34	8.215	0.487	21.564	3.119	0.042	100.336
12	325 let Yakutii	41.19	0.033	21.043	3.042	7.447	0.487	20.473	4.215	0.033	97.963
28	325 let Yakutii	41.322	0.035	21.346	2.743	8.54	0.508	19.522	5.045	0.022	99.099
89	325 let Yakutii	41.836	0.035	17.466	8.317	7.039	0.382	22.475	2.233	0.006	99.798
9	325 let Yakutii	41.547	0.039	22.17	1.363	9.954	0.468	19.415	4.38	0.054	99.412
21	325 let Yakutii	41.74	0.04	19.592	5.033	7.054	0.345	21.291	4.47	0.003	99.568
31	325 let Yakutii	41.347	0.046	23.095	0.03	14.254	0.255	17.201	3.91	0.033	100.211
59	325 let Yakutii	42.026	0.049	21.548	2.785	7.3	0.39	22.362	1.954	0.019	98.442
133	325 let Yakutii	41.351	0.051	15.358	10.576	7.365	0.489	20.934	3.725	0	99.849
77	325 let Yakutii	39.633	0.053	21.858	0.056	22.426	0.406	9.112	7.5	0	101.047
25	325 let Yakutii	41.65	0.06	20.704	3.609	8.13	0.442	20.068	4.635	0.053	99.351
126	325 let Yakutii	41.796	0.06	16.138	9.466	6.512	0.353	23.099	2.011	0.011	99.451
124	325 let Yakutii	41.254	0.061	22.489	0.166	15.271	0.384	15.865	5.045	0.024	100.59
132	325 let Yakutii	41.928	0.061	22.339	1.317	10.29	0.47	19.41	4.462	0	100.286
68	325 let Yakutii	41.566	0.062	17.586	6.742	6.632	0.339	20.52	5.117	0	98.567
99	325 let Yakutii	41.702	0.063	20.36	3.79	7.819	0.465	20.123	4.641	0.025	99.01
100	325 let Yakutii	41.891	0.065	21.304	2.911	7.75	0.463	20.337	4.814	0.008	99.543
112	325 let Yakutii	41.339	0.066	21.245	2.211	8.856	0.441	19.548	4.747	0	98.453
11	325 let Yakutii	40.547	0.068	15.21	10.626	6.651	0.34	21.144	3.268	0.018	97.872
85	325 let Yakutii	42.068	0.068	22.159	1.259	10.769	0.418	18.728	4.381	0	99.879
73	325 let Yakutii	41.313	0.069	22.639	0.156	13.511	0.438	17.108	5.139	0	100.386
19	325 let Yakutii	41.236	0.077	16.763	7.959	7.4	0.356	18.676	6.46	0.035	98.966
36	325 let Yakutii	41.604	0.097	22.324	1.293	9.976	0.426	19.329	4.566	0.048	99.696
38	325 let Yakutii	39.666	0.101	21.637	0.013	21.117	0.47	9.183	8.694	0.04	100.921
137	325 let Yakutii	41.989	0.111	22.078	1.772	9.691	0.414	19.41	4.491	0.076	100.071
121	325 let Yakutii	42.181	0.112	23.207	0.181	8.797	0.321	20.656	4.169	0.027	99.69
153	325 let Yakutii	47.8	0.112	9.627	2.368	3.061	0.097	18.948	6.477	5.352	93.962
131	325 let Yakutii	42.349	0.119	22.097	1.894	7.269	0.367	20.866	4.943	0.076	99.987
33	325 let Yakutii	41.953	0.12	23.043	0.553	9.821	0.402	20.041	4.045	0.058	100.036
145	325 let Yakutii	41.602	0.122	21.892	1.383	10.461	0.442	18.945	4.462	0	99.309
98	325 let Yakutii	41.684	0.123	22.183	1.35	11.083	0.474	19.129	4.492	0.057	100.575
109	325 let Yakutii	41.605	0.124	21.822	1.787	9.764	0.422	19.168	4.511	0.037	99.257
70	325 let Yakutii	41.388	0.126	16.629	7.985	7.052	0.376	19.332	6.211	0.026	99.142
135	325 let Yakutii	41.789	0.126	22.056	1.451	9.784	0.378	19.44	4.699	0.023	99.768
88	325 let Yakutii	41.993	0.127	22.614	1.187	9.516	0.426	19.936	4.336	0.011	100.191
45	325 let Yakutii	41.497	0.128	21.512	1.753	10.384	0.448	18.848	4.491	0.026	99.087
58	325 let Yakutii	42.096	0.155	20.505	3.644	6.658	0.329	20.424	5.816	0.05	99.689
79	325 let Yakutii	41.866	0.168	19.481	4.432	7.534	0.328	20.628	5.192	0.011	99.646
84	325 let Yakutii	41.319	0.177	18.349	6.691	6.997	0.352	20.844	5.063	0.037	99.836
142	325 let Yakutii	41.492	0.179	22.496	0.137	11.493	0.295	18.783	4.82	0.017	99.712
17	325 let Yakutii	41.491	0.192	18.718	5.663	6.224	0.257	20.403	5.751	0.011	98.71
74	325 let Yakutii	41.364	0.207	17.873	6.728	7.469	0.334	19.841	5.736	0.017	99.598
95	325 let Yakutii	42.284	0.21	20.484	3.754	6.531	0.343	21.277	4.984	0.052	99.919
56	325 let Yakutii	41.92	0.216	18.398	6.197	7.103	0.34	20.47	5.121	0.062	99.848
69	325 let Yakutii	41.028	0.247	17.788	6.916	7.385	0.294	19.923	5.451	0.029	99.061
110	325 let Yakutii	42.078	0.28	21.266	2.078	7.209	0.342	20.975	4.372	0.065	98.665
125	325 let Yakutii	41.984	0.314	19.819	3.81	6.735	0.328	20.06	6.464	0.058	99.613
92	325 let Yakutii	40.99	0.315	17.723	7.061	7.227	0.378	20.013	5.411	0.046	99.183
143	325 let Yakutii	41.239	0.318	18.843	5.331	6.907	0.352	18.517	7.667	0.046	99.224
108	325 let Yakutii	41.76	0.322	20.752	2.863	7.962	0.319	20.44	4.997	0.028	99.48
103	325 let Yakutii	41.836	0.327	20.858	2.569	8.024	0.3	20.879	4.426	0.066	99.291
144	325 let Yakutii	41.355	0.33	22.423	0.088	15.471	0.345	17.697	2.928	0.108	100.745
81	325 let Yakutii	41.227	0.331	18.234	6.024	7.701	0.399	19.287	5.891	0.035	99.129
118	325 let Yakutii	41.645	0.339	19.651	4.12	7.586	0.355	20.393	5.053	0.042	99.203
147	325 let Yakutii	40.324	0.351	16.541	8.448	7.614	0.448	18.23	6.987	0.074	99.021
42	325 let Yakutii	41.67	0.354	19.531	4.247	7.743	0.336	20.845	4.616	0.048	99.449
150	325 let Yakutii	41.232	0.376	19.224	4.896	7.397	0.319	20.48	4.884	0.048	98.867
71	325 let Yakutii	41.504	0.396	18.142	6.326	7.536	0.374	20.363	5.343	0.034	100.03
80	325 let Yakutii	41.432	0.399	16.942	7.608	6.994	0.359	19.647	5.809	0.058	99.26
23	325 let Yakutii	42.072	0.403	20.956	2.408	7.343	0.311	21.194	4.375	0.049	99.111
82	325 let Yakutii	40.941	0.427	21.27	0.697	14.3	0.519	16.465	5.459	0.075	100.153
146	325 let Yakutii	41.751	0.429	21.575	1.709	8.477	0.328	20.91	4.054	0.099	99.373
10	325 let Yakutii	41.166	0.437	20.848	2.607	8.472	0.402	20.087	4.874	0.092	98.985
32	325 let Yakutii	41.76	0.445	20.369	2.586	8.493	0.342	19.818	4.982	0.081	98.876
18	325 let Yakutii	41.924	0.463	19.299	4.729	7.191	0.335	20.587	5.119	0.107	99.754
39	325 let Yakutii	41.739	0.496	19.527	4.091	7.632	0.331	20.44	4.992	0.09	99.369
107	325 let Yakutii	41.116	0.51	20.622	2.047	9.339	0.42	19.088	5.547	0.071	98.76
50	325 let Yakutii	42.44	0.514	21.47	1.683	8.553	0.338	21.095	4.135	0.041	100.276
111	325 let Yakutii	41.71	0.52	20.354	2.955	7.47	0.363	21.05	4.839	0.072	99.338
120	325 let Yakutii	42.114	0.536	21.769	1.387	8.119	0.286	21.074	3.709	0.115	99.109
87	325 let Yakutii	41.368	0.556	21.466	0.855	13.904	0.285	17.62	4.054	0.11	100.218
43	325 let Yakutii	41.058	0.573	17.374	6.96	7.199	0.356	19.85	5.621	0.112	99.134
128	325 let Yakutii	41.977	0.576	21.111	2.378	9.145	0.35	20.087	4.313	0.073	100.042
93	325 let Yakutii	41.186	0.591	17.011	6.86	7.709	0.36	19.495	5.73	0.078	99.02
97	325 let Yakutii	41.788	0.597	21.181	1.748	8.584	0.322	21.031	4.133	0.058	99.475
64	325 let Yakutii	41.597	0.598	19.193	4.144	9.065	0.374	18.739	5.95	0.066	99.726
119	325 let Yakutii	41.292	0.604	19.175	4.706	7.159	0.337	20.609	5.175	0.039	99.138
104	325 let Yakutii	41.561	0.618	19.836	3.436	7.491	0.381	20.665	4.996	0.095	99.079
91	325 let Yakutii	42.598	0.621	22.806	0.187	7.051	0.303	21.462	4.762	0.16	99.95
65	325 let Yakutii	41.238	0.632	20.683	1.808	8.632	0.31	20.392	4.404	0.028	98.17
34	325 let Yakutii	41.546	0.635	19.302	4.097	6.514	0.32	20.664	5.57	0.08	98.735
136	325 let Yakutii	41.924	0.649	18.489	5.292	7.537	0.333	20.462	5.274	0.051	100.027
20	325 let Yakutii	41.14	0.66	16.783	7.596	7.364	0.383	19.609	5.934	0.05	99.519
117	325 let Yakutii	40.785	0.714	20.483	0.733	14.628	0.506	15.597	6.497	0.092	100.066
7	325 let Yakutii	40.785	0.731	18.876	4.293	7.672	0.355	19.553	5.73	0.045	98.04
114	325 let Yakutii	41.61	0.803	19.419	4.104	7.528	0.275	20.857	5.069	0.048	99.729
53	325 let Yakutii	41.403	0.808	18.043	5.42	7.451	0.383	19.769	5.748	0.06	99.085
62	325 let Yakutii	40.746	0.896	15.971	8.078	7.678	0.395	18.895	6.958	0.065	99.706
96	325 let Yakutii	41.682	0.974	19.527	3.336	8.158	0.322	20.425	5.131	0.079	99.634
122	325 let Yakutii	41.395	1.059	20.564	1.103	9.553	0.251	20.493	4.217	0.079	98.714
15	325 let Yakutii	40.219	1.091	18.098	4.303	8.29	0.408	19.784	5.604	0.092	97.911
49	325 let Yakutii	41.509	1.099	18.827	3.733	8.644	0.348	19.937	5.495	0.057	99.68
127	325 let Yakutii	41.455	1.149	17.597	5.142	8.319	0.327	19.809	5.772	0.121	99.699
37	325 let Yakutii	41.147	1.153	18.627	4.086	8.477	0.377	19.668	5.684	0.109	99.356
57	325 let Yakutii	41.274	1.172	17.64	5.13	8.264	0.392	19.764	5.968	0.072	99.702
66	325 let Yakutii	40.855	1.25	17.298	5.583	8.361	0.327	19.519	5.833	0.128	99.157
141	325 let Yakutii	40.949	1.29	17.124	5.143	8.447	0.337	19.182	6.027	0.119	98.643
115	325 let Yakutii	40.982	1.326	16.848	5.779	8.383	0.358	19.614	6.1	0.12	99.51
22	325 let Yakutii	41.204	1.347	17.151	5.324	8.19	0.379	19.341	6.064	0.119	99.156
27	325 let Yakutii	40.835	1.392	16.98	5.619	8.366	0.306	19.355	5.997	0.09	98.94
KM1	Komsomolskaya-Magnitnaya	42.96	0.164	20.73	2.91	6.7	0.234	22.11	4.15	0.103	100.061
KM2	Komsomolskaya-Magnitnaya	41.92	0.1	19.56	5.28	6.89	0.335	21.57	4.4	0.056	100.111
KM3	Komsomolskaya-Magnitnaya	43.15	0.27	21.24	2.85	6.18	0.278	22.53	3.87	0.108	100.476
KM4	Komsomolskaya-Magnitnaya	43.15	0.27	21.24	2.85	6.18	0.278	22.53	3.87	0.108	100.476
KM5	Komsomolskaya-Magnitnaya	41.26	0.343	16.99	7.87	7.26	0.367	20.17	5.03	0.095	99.385
KM6	Komsomolskaya-Magnitnaya	41.67	0	16.76	8.44	6.76	0.359	22.96	1.77	0.04	98.759
KM7	Komsomolskaya-Magnitnaya	41.9	0.272	20.78	3.05	6.94	0.308	21.82	3.86	0.115	99.045
KM8	Komsomolskaya-Magnitnaya	42.53	0.793	20.5	1.52	8.33	0.244	21.71	4.04	0.094	99.761
KM9	Komsomolskaya-Magnitnaya	42.65	0.795	19.95	1.57	8.62	0.295	21.19	4.2	0.092	99.362
KM10	Komsomolskaya-Magnitnaya	42.7	0.814	19.82	1.65	8.59	0.21	21.31	4.21	0.093	99.397
KM11	Komsomolskaya-Magnitnaya	41.96	0.785	17.53	5.4	6.94	0.277	21.26	4.8	0.085	99.037
KM12	Komsomolskaya-Magnitnaya	41.46	0	16.79	8.23	6.72	0.333	22.07	2.94	0.035	98.578
KM13	Komsomolskaya-Magnitnaya	40.74	1.2	15.85	7.57	9.7	0.348	18.38	5.53	0.109	99.427
KM14	Komsomolskaya-Magnitnaya	42.81	0.901	20.05	2.09	8.89	0.281	21.1	4.11	0.118	100.35
KM15	Komsomolskaya-Magnitnaya	42.7	0.12	19.97	3.42	6.48	0.267	22.39	4.5	0.044	99.891
KM16	Komsomolskaya-Magnitnaya	42.55	0.78	20.06	2.39	7.36	0.235	21.53	4.18	0.09	99.175
KM17	Komsomolskaya-Magnitnaya	42.05	0.477	19.44	4.88	7.32	0.351	20.71	4.71	0.065	100.003
KM18	Komsomolskaya-Magnitnaya	41.32	0.788	19.43	3.48	8.36	0.282	20.82	4.15	0.088	98.718
KM19	Komsomolskaya-Magnitnaya	42.65	1.06	20.1	0.81	10.34	0.271	20.17	4.15	0.112	99.663
KM20	Komsomolskaya-Magnitnaya	42.06	1.05	20.32	0.83	10.15	0.237	19.78	4.24	0.154	98.821
KM21	Komsomolskaya-Magnitnaya	42.08	0.533	20.79	2.91	7.79	0.349	21.31	4.09	0.089	99.941
KM22	Komsomolskaya-Magnitnaya	42.29	0.201	15.82	8.53	6.53	0.341	23.33	2.05	0.032	99.124
KM23	Komsomolskaya-Magnitnaya	41.66	0	14.7	12.01	6.22	0.316	23.28	1.9	0.023	100.109
KM24	Komsomolskaya-Magnitnaya	42.06	0	15.17	10.7	5.72	0.31	24.06	1.69	0.041	99.751
KM25	Komsomolskaya-Magnitnaya	41.98	0.328	20	2.81	7.29	0.25	21.18	4.49	0.083	98.411
KM26	Komsomolskaya-Magnitnaya	42.5	0.862	20.5	1.6	8.52	0.247	21.1	4.17	0.087	99.586
KM27	Komsomolskaya-Magnitnaya	42	0.269	19.99	4.21	7.22	0.356	21.57	4.1	0.052	99.767
KM28	Komsomolskaya-Magnitnaya	41.47	0.364	18.8	5.6	6.99	0.409	20.79	4.35	0.076	98.849
KM29	Komsomolskaya-Magnitnaya	42.73	0.819	20.32	2.01	7.47	0.233	21.58	4.07	0.218	99.45
KM30	Komsomolskaya-Magnitnaya	42.83	0.005	20.67	4.44	6.24	0.334	23.13	2.97	0.129	100.748
KM31	Komsomolskaya-Magnitnaya	42.17	0.674	20.56	2.17	9.02	0.307	20.05	4.42	0.23	99.601
KM32	Komsomolskaya-Magnitnaya	41.63	0.764	21.33	0.04	12.55	0.391	18.56	3.86	0.126	99.251
KM33	Komsomolskaya-Magnitnaya	42.53	0.331	20.48	3.39	6.48	0.325	22.29	4.04	0.068	99.934
KM34	Komsomolskaya-Magnitnaya	41.89	0.282	19.45	4.88	7.15	0.318	21.27	4.45	0.068	99.758
KM35	Komsomolskaya-Magnitnaya	42.57	0.361	20.49	3.59	7.07	0.345	21.25	4.24	0.075	99.991
KM36	Komsomolskaya-Magnitnaya	42.12	0.449	20.23	3.89	6.89	0.315	21.56	4.44	0.083	99.977
KM37	Komsomolskaya-Magnitnaya	41.65	0.387	20.31	3.44	6.99	0.31	21.14	4.25	0.08	98.557
KM38	Komsomolskaya-Magnitnaya	42.1	0.411	20.23	3.72	6.77	0.332	21.55	4.41	0.081	99.604
KM39	Komsomolskaya-Magnitnaya	41.69	0.384	20.34	3.12	6.91	0.28	21.36	4.3	0.064	98.448
KM40	Komsomolskaya-Magnitnaya	42.18	0	17	9.39	6.33	0.311	23.84	1.18	0.023	100.254
KM41	Komsomolskaya-Magnitnaya	41.84	0.221	18.17	6.37	6.69	0.342	20.99	4.37	0.16	99.153
KM42	Komsomolskaya-Magnitnaya	42.14	0.956	20.02	1.28	8.81	0.23	20.74	4.14	0.103	98.419
KM43	Komsomolskaya-Magnitnaya	42.68	0.767	20.45	2.08	7.82	0.265	21.58	4.25	0.155	100.047
KM44	Komsomolskaya-Magnitnaya	41.93	0.544	20.97	1.79	8	0.343	21.36	3.99	0.081	99.008
KM45	Komsomolskaya-Magnitnaya	41.64	0.277	18.89	5.34	6.99	0.394	21.68	3.96	0.05	99.221
KM46	Komsomolskaya-Magnitnaya	42.26	0.715	19.99	1.91	7.53	0.242	21.62	4.06	0.074	98.401
KM47	Komsomolskaya-Magnitnaya	42.42	0.354	20.88	2.73	6.93	0.269	22.24	4.08	0.058	99.961
KM48	Komsomolskaya-Magnitnaya	43.29	0.8	21.26	1.11	7.73	0.293	22.27	3.9	0.11	100.763
KM49	Komsomolskaya-Magnitnaya	42.15	0.858	20.17	1.44	8.53	0.245	21.12	4.05	0.093	98.656
KM50	Komsomolskaya-Magnitnaya	42.27	0.802	20.98	1.21	7.99	0.235	21.77	3.92	0.087	99.264
KM51	Komsomolskaya-Magnitnaya	41.91	1.183	16.48	5.83	9.31	0.312	19.5	5.32	0.104	99.949
KM52	Komsomolskaya-Magnitnaya	42.65	0.854	19.92	2.63	7.6	0.264	21.73	4.29	0.077	100.015
KM53	Komsomolskaya-Magnitnaya	42.55	0.888	20.68	1.39	8.72	0.256	21.46	4.12	0.125	100.189
KM54	Komsomolskaya-Magnitnaya	42.47	0.948	20.55	1.85	8.51	0.249	21.16	4.32	0.084	100.141
KM55	Komsomolskaya-Magnitnaya	42.12	0.996	19.04	4.35	7.2	0.358	21.47	4.65	0.167	100.351
KM56	Komsomolskaya-Magnitnaya	41.92	0.684	19.02	4.92	7.71	0.322	20.88	4.62	0.161	100.237
KM57	Komsomolskaya-Magnitnaya	43.01	0.916	21.15	1.17	8.26	0.261	21.5	4.16	0.088	100.515
KM58	Komsomolskaya-Magnitnaya	42.38	0.454	19.69	4.51	6.84	0.313	21.44	4.47	0.087	100.184
KM59	Komsomolskaya-Magnitnaya	42.94	0.81	21.29	0.18	8.39	0.317	20.8	4.03	0.515	99.272
KM60	Komsomolskaya-Magnitnaya	42.1	0.483	19.84	4.34	7.05	0.297	21.42	4.38	0.085	99.995
KM61	Komsomolskaya-Magnitnaya	41.4	0.256	19.06	5.43	6.54	0.376	20.16	5.17	0.099	98.491
KM62	Komsomolskaya-Magnitnaya	42.68	0.886	20.76	1.42	9.11	0.255	21.13	4.12	0.085	100.446
KM63	Komsomolskaya-Magnitnaya	42.73	0.806	21.09	1.2	8.31	0.239	21.76	4	0.103	100.238
KM64	Komsomolskaya-Magnitnaya	41.94	0.444	20.52	2.99	7.86	0.293	21.5	4.17	0.064	99.781
KM65	Komsomolskaya-Magnitnaya	42.05	0.477	19.44	4.88	7.32	0.351	20.71	4.71	0.065	100.003
KM66	Komsomolskaya-Magnitnaya	42.04	0.828	20.62	0.97	8.35	0.265	21.43	3.97	0.079	98.552
KM67	Komsomolskaya-Magnitnaya	42.58	0.862	20.48	1.68	8.51	0.269	21.31	4.24	0.098	100.029
KM68	Komsomolskaya-Magnitnaya	42.77	0.873	20.96	1.02	8.42	0.217	21.88	4.14	0.09	100.37
KM69	Komsomolskaya-Magnitnaya	41.95	0.491	19.29	4.86	7.71	0.303	20.81	4.74	0.053	100.207
KM70	Komsomolskaya-Magnitnaya	41.65	0.968	17.95	5.24	7.42	0.282	21.2	4.52	0.094	99.324
KM71	Komsomolskaya-Magnitnaya	41.57	0	18.46	6.7	6.55	0.328	22.79	2.24	0.028	98.666
KM72	Komsomolskaya-Magnitnaya	41.98	0.332	19.51	4.75	7.27	0.336	21.46	4.39	0.059	100.087
KM73	Komsomolskaya-Magnitnaya	42.18	0.849	19.32	4.01	8.1	0.262	21.14	4.43	0.096	100.387
KM74	Komsomolskaya-Magnitnaya	42.58	0.525	19.67	4.02	7.63	0.299	21.21	4.41	0.068	100.412
KM75	Komsomolskaya-Magnitnaya	42.31	1.022	17.84	5.24	7.13	0.265	21.54	4.84	0.086	100.273
KM76	Komsomolskaya-Magnitnaya	44.23	0.663	19.55	2.09	5.72	0.326	23.85	4.22	0.07	100.719
KM77	Komsomolskaya-Magnitnaya	42.55	0.88	20.38	1.85	8.71	0.25	21.19	4.28	0.119	100.209
KM78	Komsomolskaya-Magnitnaya	42.54	0.862	20.18	1.47	8.31	0.268	21.41	4.13	0.131	99.301
KM79	Komsomolskaya-Magnitnaya	42.43	0.539	18.58	4.99	7.04	0.299	21.46	4.86	0.061	100.259
KM80	Komsomolskaya-Magnitnaya	42.22	0.172	21.16	2.82	7.27	0.343	21.54	4.28	0.135	99.94
KM81	Komsomolskaya-Magnitnaya	42.01	0.359	18.9	5.6	6.9	0.343	20.78	5.03	0.073	99.995
KM82	Komsomolskaya-Magnitnaya	42.58	0.895	20.02	1.54	8.4	0.232	21.16	4.18	0.108	99.115
KM83	Komsomolskaya-Magnitnaya	42.66	0.842	20.63	0.53	8.9	0.232	20.93	3.95	0.22	98.894
KM84	Komsomolskaya-Magnitnaya	41.93	0.559	19.36	4.58	6.59	0.307	21.38	4.95	0.091	99.747
KM85	Komsomolskaya-Magnitnaya	41.53	0.282	18.94	5.63	6.13	0.32	18.81	8.1	0.058	99.8
KM86	Komsomolskaya-Magnitnaya	41.83	0.314	20.57	3.1	6.75	0.332	21.83	4.08	0.072	98.878
KM87	Komsomolskaya-Magnitnaya	41.64	0	16.23	9.19	6.51	0.334	23.66	0.99	0.016	98.57
KM88	Komsomolskaya-Magnitnaya	41.68	0	18.58	6.06	7.03	0.402	21.08	4.16	0.036	99.028
KM89	Komsomolskaya-Magnitnaya	42.15	1.26	20.31	0.61	11.33	0.265	19.39	4.15	0.121	99.586
KM90	Komsomolskaya-Magnitnaya	41.79	1.2	20.11	0.63	10.66	0.301	19.66	4.07	0.127	98.548
KM91	Komsomolskaya-Magnitnaya	42.03	0.727	18.64	5.27	7.68	0.284	21.37	4.41	0.097	100.508
KM92	Komsomolskaya-Magnitnaya	42.08	0.312	18.53	6.37	6.35	0.334	21.99	4.27	0.049	100.285
KM93	Komsomolskaya-Magnitnaya	41.69	0.724	17.59	6.87	7.08	0.412	20.5	4.94	0.099	99.905
KM94	Komsomolskaya-Magnitnaya	42.12	1.231	20.66	0.57	11.19	0.293	19.75	4.13	0.115	100.059
KM95	Komsomolskaya-Magnitnaya	42.22	0.454	20.25	3.65	7.04	0.309	21.91	4.1	0.064	99.997
KM96	Komsomolskaya-Magnitnaya	42.25	0.989	20.31	0.85	9.87	0.23	20.36	4	0.109	98.968
KM97	Komsomolskaya-Magnitnaya	41.61	0.978	20.37	0.89	9.91	0.276	20.37	3.98	0.111	98.495
KM98	Komsomolskaya-Magnitnaya	41.48	0.279	19.39	4.62	7.06	0.357	21.16	4.01	0.075	98.431
KM99	Komsomolskaya-Magnitnaya	42.65	0.861	20.66	1.55	8.51	0.264	21.69	4.06	0.087	100.332
KM100	Komsomolskaya-Magnitnaya	42.39	1.006	20.79	0.83	9.91	0.222	20.68	4.04	0.118	99.986
KM101	Komsomolskaya-Magnitnaya	42.22	0.454	20.25	3.65	7.04	0.309	21.91	4.1	0.064	99.997
KM102	Komsomolskaya-Magnitnaya	42.62	0.742	20.26	2.06	7.3	0.214	21.96	4.05	0.091	99.297
KM103	Komsomolskaya-Magnitnaya	41.74	0.818	19.69	2.5	7.93	0.228	21.46	4.17	0.077	98.613
KM104	Komsomolskaya-Magnitnaya	42.65	0.854	19.92	2.63	7.6	0.264	21.73	4.29	0.077	100.015
KM105	Komsomolskaya-Magnitnaya	41.63	0.842	18.49	5.23	7.26	0.342	20.52	5.58	0.069	99.963
KM106	Komsomolskaya-Magnitnaya	41.95	0.132	19.33	5.26	7.5	0.373	20.42	5.11	0.025	100.1
KM107	Komsomolskaya-Magnitnaya	42.05	0.131	19.37	5.25	7.36	0.381	20.55	5.04	0.03	100.162
KM108	Komsomolskaya-Magnitnaya	41.99	0.138	19.45	5.11	7.31	0.335	20.99	4.98	0.075	100.378
KM109	Komsomolskaya-Magnitnaya	42.06	0.692	19.42	4.44	7.32	0.303	21.41	4.55	0.082	100.277
KM110	Komsomolskaya-Magnitnaya	41.29	0.678	20.06	2.76	8.22	0.351	20.87	4.13	0.062	98.421
KM111	Komsomolskaya-Magnitnaya	41.97	0.16	19.16	5.26	7.51	0.356	20.45	5.14	0.042	100.048
KM112	Komsomolskaya-Magnitnaya	42.12	0.449	20.23	3.89	6.89	0.315	21.56	4.44	0.083	99.977
KM113	Komsomolskaya-Magnitnaya	42.39	0.333	20.18	4.01	7.04	0.399	21.52	4.21	0.064	100.146
KM114	Komsomolskaya-Magnitnaya	44.06	0.878	18.98	1.05	6.76	0.208	23.28	4.19	0.098	99.504
KM115	Komsomolskaya-Magnitnaya	41.38	0.299	19.87	3.99	7.33	0.335	21.2	4.08	0.065	98.549
KM116	Komsomolskaya-Magnitnaya	42.69	0.844	20.11	1.98	8.4	0.244	21.76	3.87	0.1	99.998
KM117	Komsomolskaya-Magnitnaya	42.45	0.28	20.26	3.8	6.25	0.248	22.23	3.87	0.167	99.555
KM118	Komsomolskaya-Magnitnaya	43.38	0.919	20.57	1.72	7.22	0.214	22.96	3.57	0.109	100.662
KM119	Komsomolskaya-Magnitnaya	42.36	0.031	20.29	4.57	6.14	0.343	22.61	4.17	0.032	100.546
KM120	Komsomolskaya-Magnitnaya	40.71	0	14.71	11.59	6.64	0.408	22.31	2.35	0.029	98.747
KM121	Komsomolskaya-Magnitnaya	41.38	0.751	17.77	6.38	7.7	0.346	20.44	4.72	0.141	99.628
KM122	Komsomolskaya-Magnitnaya	42.64	0.874	20.36	1.81	8.04	0.23	21.81	4.11	0.091	99.965
KM123	Komsomolskaya-Magnitnaya	42.77	0.838	20.14	1.51	8.41	0.242	21.4	3.97	0.249	99.529
KM124	Komsomolskaya-Magnitnaya	42.59	1.128	19.67	2.34	8.08	0.244	21.82	4.43	0.102	100.404
KM125	Komsomolskaya-Magnitnaya	41.8	0.297	18.65	5.19	7.14	0.327	21.18	4.1	0.083	98.767
KM126	Komsomolskaya-Magnitnaya	42.44	1.12	19.16	2.38	8.41	0.212	20.9	4.51	0.15	99.282
KM127	Komsomolskaya-Magnitnaya	42.34	0.841	20.47	1.55	8.16	0.238	21.76	4.15	0.082	99.591
KM128	Komsomolskaya-Magnitnaya	43.12	0.788	19.85	1.97	7.7	0.227	21.58	4.05	0.301	99.586
KM129	Komsomolskaya-Magnitnaya	41.07	0.976	22.98	2.3	7.58	0.244	20.68	4.03	0.096	99.956
KM130	Komsomolskaya-Magnitnaya	42.64	0.295	18.03	5.59	6.32	0.354	22.33	4.19	0.068	99.817
KM131	Komsomolskaya-Magnitnaya	42.39	1.006	20.79	0.83	9.91	0.222	20.68	4.04	0.118	99.986
KM132	Komsomolskaya-Magnitnaya	41.35	0.461	15.99	9.21	7.78	0.381	18.89	6.28	0.062	100.404
KM133	Komsomolskaya-Magnitnaya	42.9	0.823	16.32	7.06	5.56	0.287	22.55	4.91	0.081	100.491
KM134	Komsomolskaya-Magnitnaya	42.55	0	22.22	2.36	7.91	0.45	21.54	3.35	0.022	100.402
KM135	Komsomolskaya-Magnitnaya	42.6	0.321	21.41	2.12	7.1	0.33	21.93	4.1	0.051	99.962
KM136	Komsomolskaya-Magnitnaya	42.29	0.436	21.39	2.05	7.49	0.266	21.72	4.27	0.064	99.976
KM137	Komsomolskaya-Magnitnaya	42.23	0	21.92	2.49	8.31	0.446	21.11	3.49	0.05	100.046
KM138	Komsomolskaya-Magnitnaya	44.14	0.967	18.77	1.42	5.87	0.286	23.84	4.39	0.067	99.75
KM139	Komsomolskaya-Magnitnaya	42.25	0.437	19.55	4.67	7.15	0.318	21.09	4.48	0.071	100.016
KM140	Komsomolskaya-Magnitnaya	42.03	0.93	20.3	1.43	8.13	0.306	21.16	4.02	0.09	98.396
KM141	Komsomolskaya-Magnitnaya	42.02	0.897	20.81	0.88	8.72	0.276	20.67	4.08	0.09	98.443
KM142	Komsomolskaya-Magnitnaya	43.14	1.031	20.74	1.48	6.7	0.242	22.36	4.4	0.067	100.16
KM143	Komsomolskaya-Magnitnaya	42.14	0.337	19.94	4.12	6.79	0.421	20.2	6.18	0.063	100.191
KM144	Komsomolskaya-Magnitnaya	41.98	0.068	19.38	4.98	7.15	0.369	20.88	4.58	0.085	99.472
KM145	Komsomolskaya-Magnitnaya	41.18	0.233	16.43	8.79	9.47	0.339	20.31	3.64	0.067	100.459
KM146	Komsomolskaya-Magnitnaya	41.14	0.16	16.48	8.8	8.53	0.304	20.38	3.43	0.038	99.262
KM147	Komsomolskaya-Magnitnaya	41.34	0.302	18.59	5.86	6.26	0.263	18.85	8.08	0.078	99.623
KM148	Komsomolskaya-Magnitnaya	42.31	0.019	18.66	6.62	6	0.326	22.22	4.04	0.042	100.237
KM149	Komsomolskaya-Magnitnaya	42.18	1.046	18.72	3.88	8.29	0.262	20.92	4.62	0.086	100.004
KM150	Komsomolskaya-Magnitnaya	41.47	0.315	17.26	7.55	7.14	0.348	20.19	5.61	0.129	100.012
KM151	Komsomolskaya-Magnitnaya	41.39	0.754	18.17	5.75	6.91	0.368	20.01	5.85	0.089	99.291
KM152	Komsomolskaya-Magnitnaya	41.91	0.165	18.66	6.54	7.15	0.362	20.99	4.41	0.073	100.26
KM153	Komsomolskaya-Magnitnaya	41.63	0.842	18.49	5.23	7.26	0.342	20.52	5.58	0.069	99.963
KM154	Komsomolskaya-Magnitnaya	40.97	1.13	16.17	7.61	9.46	0.372	18.75	5.36	0.12	99.942
KM155	Komsomolskaya-Magnitnaya	42.15	0.179	19.5	4.58	7.89	0.316	20.71	4.72	0.047	100.092
KM156	Komsomolskaya-Magnitnaya	42.32	0.809	20.58	1.51	8.5	0.277	21.42	4.12	0.094	99.63
KM157	Komsomolskaya-Magnitnaya	42.03	0	19.46	5.65	5.85	0.311	23.96	1.26	0.02	98.541
KM158	Komsomolskaya-Magnitnaya	41.76	0.002	15.98	10.62	6.18	0.299	24.08	1.31	0.041	100.272
KM159	Komsomolskaya-Magnitnaya	41.51	0.24	18.55	6.03	6.34	0.402	18.64	7.74	0.112	99.564
KM160	Komsomolskaya-Magnitnaya	42.04	0.416	19.2	5.51	6.08	0.313	21.32	5.18	0.071	100.13
KM161	Komsomolskaya-Magnitnaya	41.01	0.272	15.82	9.89	7.45	0.346	20.27	5.01	0.048	100.116
KM162	Komsomolskaya-Magnitnaya	40.98	0.34	15.62	10.19	7.33	0.351	19.99	5.11	0.049	99.96
KM163	Komsomolskaya-Magnitnaya	41.73	0	19.75	5.51	7.4	0.337	20.78	4.7	0.022	100.229
KM164	Komsomolskaya-Magnitnaya	42.1	0.461	19.73	4.4	6.83	0.311	21.62	4.36	0.148	99.96
KM165	Komsomolskaya-Magnitnaya	42.05	0.551	18.88	4.9	6.46	0.309	21.58	4.24	0.188	99.158
KM166	Komsomolskaya-Magnitnaya	41.5	0.706	16.61	8.38	6.89	0.39	20.28	5.31	0.091	100.157
KM167	Komsomolskaya-Magnitnaya	42.45	0.333	19.51	4.97	6.56	0.343	22.12	3.82	0.066	100.172
KM168	Komsomolskaya-Magnitnaya	42.02	0.068	18.57	6.66	6.94	0.332	21.07	4.67	0.036	100.366
KM169	Komsomolskaya-Magnitnaya	41.99	0.009	18.25	7.18	5.6	0.336	23.64	2.38	0.033	99.418
KM170	Komsomolskaya-Magnitnaya	41.43	0.438	16.58	8.22	6.98	0.327	20.54	4.95	0.081	99.546
KM171	Komsomolskaya-Magnitnaya	42.18	1.046	18.72	3.88	8.29	0.262	20.92	4.62	0.086	100.004
KM172	Komsomolskaya-Magnitnaya	42.08	0.203	18.98	5.81	6.98	0.358	21.38	4.19	0.05	100.031
KM173	Komsomolskaya-Magnitnaya	41.98	0	20.89	3.53	6.61	0.311	21.98	3.92	0.076	99.297
KM174	Komsomolskaya-Magnitnaya	42.52	0.921	19.75	1.93	7.96	0.239	21.41	4.1	0.096	98.926
KM175	Komsomolskaya-Magnitnaya	41.17	1.364	16.48	6.58	7.29	0.388	20.19	5.66	0.103	99.225
KM176	Komsomolskaya-Magnitnaya	41.99	0	16.38	9.74	6.77	0.389	23.65	1.29	0.015	100.224
MAlG00	Malaya	42.27	0.072	23.01	0.172	9.7	0.344	18.39	5.15	0.048	99.156
MAlG01	Malaya	42.59	0.001	22.33	2.02	6.84	0.295	22.21	2.58	0.05	98.916
MAlG02	Malaya	41.77	0.105	22.02	1.74	7.78	0.398	20.9	4.28	0.039	99.032
MAlG03	Malaya	42.19	0.087	22.01	1.83	7.56	0.384	20.76	4.45	0.052	99.323
MAlG04	Malaya	41.36	0.048	21.96	1.79	7.63	0.387	21	4.28	0.035	98.49
MAlG05	Malaya	42.04	0.009	21.36	2.64	7.17	0.394	21.1	4.07	0.008	98.791
MAlG06	Malaya	41.25	0.056	21.33	2.16	7.15	0.367	19.55	7.05	0.04	98.953
MAlG07	Malaya	41.94	0.007	21.32	2.83	7.81	0.455	20.02	5.02	0	99.402
MAlG08	Malaya	41.68	0.08	21.28	2.6	7.29	0.375	18.77	7.29	0.021	99.386
MAlG09	Malaya	42.16	0.036	21.28	2.87	7.54	0.43	20.55	5.06	0.026	99.952
MAlG10	Malaya	41.66	0.067	21.28	2.61	7.27	0.458	19.46	5.82	0.054	98.679
MAlG11	Malaya	41.5979	0	21.8763	2.49485	7.01031	0.361856	22.4742	3.24742	0.0525773	99.1155
MAlG12	Malaya	41.6	0.029	21.2	2.71	8.47	0.497	19.4	5.18	0.061	99.147
MAlG13	Malaya	42.96	0	21.18	3.38	7.29	0.421	22.85	1.77	0.031	99.882
MAlG14	Malaya	42.36	0.002	21.11	3.6	7.22	0.374	21.94	2.32	0.041	98.967
MAlG15	Malaya	42.04	0.002	21.04	3.24	7.27	0.377	21.01	3.39	0.058	98.427
MAlG16	Malaya	42.23	0.044	21.02	3.44	7.65	0.452	20.89	3.27	0.058	99.054
MAlG17	Malaya	41.66	0.072	21.01	3.26	7.7	0.404	21.41	3.28	0.1	98.896
MAlG18	Malaya	41.36	0.006	20.96	3.12	7.72	0.456	22.27	2.72	0.057	98.669
MAlG19	Malaya	42.06	0	20.9	3.55	7.39	0.38	21.89	2.92	0.034	99.124
MAlG20	Malaya	42.06	0	20.9	3.61	7.65	0.432	21.52	3.31	0.043	99.525
MAlG21	Malaya	41.28	0	20.89	3.37	7.38	0.429	22.49	2.51	0.017	98.366
MAlG22	Malaya	40.66	0.074	20.89	2.39	7.32	0.486	19.45	6.71	0.089	98.069
MAlG23	Malaya	39.4286	0.0857143	21.3061	0	23.2449	0.497959	8.04082	7.33674	0.0489796	99.9898
MAlG24	Malaya	42.3367	0	21.2449	3.42857	7.11224	0.395918	23.8878	1.52041	0.0673469	99.9939
MAlG25	Malaya	41.83	0	20.79	3.46	7.2	0.353	23.17	2.16	0.044	99.007
MAlG26	Malaya	41.98	0.002	20.74	3.5	7.9	0.459	21.33	3.52	0.037	99.468
MAlG27	Malaya	42.0306	0.00102041	21.0816	3.91837	7.42857	0.482653	21.6633	3.26531	0.05	99.9214
MAlG28	Malaya	41.84	0.012	20.63	3.86	7.53	0.435	20.42	3.9	0.034	98.661
MAlG29	Malaya	37.92	0.052	20.63	0.024	21.56	0.469	7.87	7.55	0.037	96.112
MAlG30	Malaya	41.8	0	20.62	3.65	7.61	0.417	21.71	3.13	0.069	99.006
MAlG31	Malaya	40.74	0	20.59	3.38	7.05	0.426	23.79	2.04	0.106	98.122
MAlG32	Malaya	41.56	0	20.31	4.14	7.4	0.453	20.76	4.01	0.013	98.646
MAlG33	Malaya	41.97	0.3	20.16	3.51	7.38	0.289	20.91	4.92	0.057	99.496
MAlG34	Malaya	42.09	0.316	20.14	3.52	7.3	0.234	21	4.91	0.067	99.577
MAlG35	Malaya	42.05	0.353	20.12	3.51	7.58	0.275	21.13	4.65	0.07	99.738
MAlG36	Malaya	41.96	0.317	20.12	3.56	7.31	0.296	21.03	4.83	0.058	99.481
MAlG37	Malaya	41.52	0.329	20.11	3.59	7.21	0.324	21	4.87	0.071	99.024
MAlG38	Malaya	42.36	0.299	20.09	3.52	7.54	0.282	20.86	5.03	0.052	100.033
MAlG39	Malaya	41.36	0	20.07	4.52	7.37	0.372	20.37	4.79	0.038	98.89
MAlG40	Malaya	42.27	0.288	20.07	3.54	7.13	0.281	21.05	4.97	0.064	99.663
MAlG41	Malaya	41.63	0.296	20.05	3.53	7.2	0.31	21.05	4.81	0.061	98.937
MAlG42	Malaya	41.48	0.018	20.01	4.61	7.22	0.5	20.34	4.87	0.031	99.079
MAlG43	Malaya	41.24	0.338	20	3.48	7.47	0.296	21.06	4.63	0.064	98.578
MAlG44	Malaya	41.47	0.348	19.95	3.05	7.43	0.298	21.11	4.81	0.062	98.528
MAlG45	Malaya	41.96	0.336	19.93	3.41	7.15	0.321	20.86	4.91	0.059	98.936
MAlG46	Malaya	42.2245	0.32449	20.2653	3.46939	7.09184	0.235714	21.3163	4.9898	0.0438776	99.9612
MAlG47	Malaya	41.56	0.005	19.78	5.01	7.66	0.429	19.32	5.41	0.032	99.206
MAlG48	Malaya	41.8469	0.283674	20.1633	3.60204	7.19388	0.243877	21.7245	4.84694	0.0622449	99.9673
MAlG49	Malaya	41.25	0.398	19.59	3.72	7.21	0.28	20.83	4.79	0.077	98.145
MAlG50	Malaya	41.16	0.314	19.55	3.43	7.27	0.272	21.14	4.85	0.093	98.079
MAlG51	Malaya	41.3674	0.30102	19.7653	3.78571	7.46939	0.29898	21.449	4.88776	0.128571	99.4531
MAlG52	Malaya	41.23	0.788	19	4.42	7.16	0.327	19.91	5.75	0.095	98.68
MAlG53	Malaya	41.85	0.183	18.91	4.94	7.89	0.306	20.07	5.28	0.059	99.488
MAlG54	Malaya	42.8674	0.526531	19.0612	3.35714	6.7449	0.262245	20.4694	4.67347	8.26531	98.0449
MAlG55	Malaya	41	0.173	18.65	3.55	7.21	0.273	20.79	4.82	0.109	96.575
MAlG56	Malaya	41.75	0.753	18.61	4.99	7.38	0.326	20.25	5.63	0.08	99.769
MAlG57	Malaya	41.62	1.27	18.25	4.11	8.42	0.342	19.51	5.83	0.094	99.446
MAlG58	Malaya	41.61	1.29	18.24	4.38	7.83	0.336	19.87	5.61	0.117	99.283
MAlG59	Malaya	41.2755	0.736735	18.4796	4.9898	7.15306	0.310204	20.4592	5.67347	0.104082	99.1816
MAlG60	Malaya	40.54	0.493	18.09	5.83	6.88	0.325	19.54	6.68	0.09	98.468
MAlG61	Malaya	41.15	1.17	18.08	4.43	8.39	0.317	19.82	5.8	0.109	99.266
MAlG62	Malaya	42.2959	0.326531	18.3571	5.19388	7.46939	0.341837	19.9388	5.37755	3.36735	99.3347
MAlG63	Malaya	41.25	0.278	17.97	6.63	6.3	0.308	18.64	7.62	0.056	99.052
MAlG64	Malaya	41.25	0.25	17.87	6.67	6.46	0.309	18.75	7.56	0.071	99.19
MAlG65	Malaya	41.37	0.301	17.69	6.64	6.26	0.308	18.55	7.68	0.05	98.849
MAlG66	Malaya	41.38	0.489	17.61	6.33	8.1	0.307	20.17	4.37	0.074	98.83
MAlG67	Malaya	41.18	0.375	17.6	6.55	6.3	0.296	18.49	7.66	0.058	98.509
MAlG68	Malaya	41.27	0.802	17.58	6.19	6.85	0.303	19.21	6.3	0.075	98.58
MAlG69	Malaya	41.55	0.758	17.54	6.12	7.12	0.35	19.61	6.31	0.072	99.43
MAlG70	Malaya	41.02	0.832	17.51	6.13	7.09	0.293	19.6	6.36	0.106	98.941
MAlG71	Malaya	41.55	0.369	17.5	6.82	6.57	0.289	18.82	7.67	0.048	99.636
MAlG72	Malaya	41.18	0.825	17.45	6.06	7.3	0.313	19.85	6.37	0.108	99.456
MAlG73	Malaya	41.17	0.754	17.34	6.31	7.22	0.347	19.79	6.19	0.074	99.195
MAlG74	Malaya	39.41	0.253	17.34	6.55	6.35	0.33	19.09	7.59	0.061	96.974
MAlG75	Malaya	40.91	0.682	17.29	6.63	7.61	0.299	19.83	5.65	0.085	98.986
MAlG76	Malaya	40.7653	0.392857	17.6327	6.83674	6.17347	0.313265	19.1122	7.60204	0.0479592	98.8765
MAlG77	Malaya	41.33	0.444	17.17	6.93	6.67	0.291	18.82	7.75	0.072	99.477
MAlG78	Malaya	40.78	0.21	17.06	7.86	6.6	0.399	19.15	6.31	0.076	98.445
MAlG79	Malaya	41.08	0.363	16.8	7.77	7	0.339	20.11	5.46	0.054	98.976
MAlG80	Malaya	40.949	1.29592	16.898	6.04082	7.9898	0.326531	19.8673	5.94898	0.122449	99.4388
MAlG81	Malaya	41.68	0.094	16.25	9.89	6.21	0.363	23.25	1.54	0.057	99.334
MAlG82	Malaya	40.94	0.36	16.15	8.73	6.68	0.365	20.23	5.46	0.076	98.991
MAlG83	Malaya	39.8775	0.564286	16.4796	6.85714	10.8571	0.504082	16.3061	7.39796	0.0959184	98.9398
MAlG84	Malaya	40.69	0.464	15.79	9.19	6.6	0.304	19.63	6.02	0.07	98.758
MAlG85	Malaya	40.33	0.348	12.84	13.34	6.01	0.294	18.39	7.7	0.056	99.308
MAlG86	Malaya	47.0619	0.114433	11.5773	2.46392	2.36083	0.0185567	19.3299	10.0103	5	97.9371
Peridotites
№	Comment	SiO2	TiO2	Al2O3	Cr2O3	FeO	MnO	MgO	CaO	Na2O	Total
05/154	Komsomolskaya xen	42.302	0.12	20.992	4.292	7.517	0.448	22.842	2.126		100.639
05/157	Komsomolskaya xen	42.029	0.078	17.359	8.193	7.274	0.411	21.749	3.31		100.403
05/208	Komsomolskaya xen	42.562	0.079	16.515	9.431	6.255	0.38	23.657	1.526		100.405
05/216	Komsomolskaya xen	41.643	0.119	20.852	4.865	6.048	0.386	24.66	1.569		100.142
05/222	Komsomolskaya xen	42.86	0.121	23.697	1.148	6.127	0.351	23.571	1.363		99.238
05/222	Komsomolskaya xen	43.019	0.119	23.798	1.276	6.637	0.379	24.466	1.392		101.086
05/225	Komsomolskaya xen	41.85	0.084	17.14	9.078	6.887	0.43	23.884	0.616		99.969
05/228	Komsomolskaya xen	42.808	0.12	20.602	3.463	6.688	0.312	21.614	4.811		100.418
05/230	Komsomolskaya xen	41.821	0.087	20.818	4.079	8.143	0.491	20.765	3.508		99.712
05/235	Komsomolskaya xen	41.995	0.085	19.563	6.147	6.853	0.427	21.632	3.455		100.157
05/237	Komsomolskaya xen	43.006	0.077	22.538	1.649	7.354	0.419	23.446	1.809		100.298
05/240	Komsomolskaya xen	41.945	0.085	21.094	4.182	7.325	0.448	21.207	3.703		99.989
05/241	Komsomolskaya xen	41.785	0.335	19.396	5.247	6.019	0.363	19.438	7.31		99.893
05/242	Komsomolskaya xen	41.931	0.086	17.651	8.564	6.304	0.424	23.707	0.815		99.482
05/243	Komsomolskaya xen	41.94	0.388	19.826	3.921	6.557	0.392	20.584	6.304		99.912
05/243	Komsomolskaya xen	42.318	0.38	19.547	4.049	6.698	0.416	20.546	6.338		100.292
05/246	Komsomolskaya xen	42.473	0.079	16.306	9.074	6.664	0.453	23.23	1.359		99.638
05/247	Komsomolskaya xen	41.18	0.121	13.715	12.671	6.554	0.391	21.53	3.318		99.48
05/247	Komsomolskaya xen	41.182	0.085	13.739	12.774	6.457	0.488	21.326	3.412		99.463
05/249	Komsomolskaya xen	42.166	0.084	17.367	9.012	6.758	0.389	24.004	0.502		100.282
05/250	Komsomolskaya xen	42.09	0.079	16.099	9.85	7.177	0.453	22.815	1.693		100.256
05/291	Komsomolskaya xen	42.546	0.839	20.531	1.438	8.865	0.269	21.23	4.221		99.939
05/294	Komsomolskaya xen	41.782	0.078	15.871	10.39	7.137	0.438	22.137	2.506		100.339
05/300	Komsomolskaya xen	42.452	0.077	22.175	2.208	7.418	0.471	24.127	1.197		100.125
K-M 25	gnt in xen 60x35mm	42.548	0.932	21.215	1.012	8.82402	0.252	21.131	4.211		100.125
K-M 26	gnt in xen, 15x6mm	42.592	0	22.753	2.136	7.16346	0.358	22.032	3.083		100.117
K-M 27	gnt in xen,25x25mm	41.895	1.018	18.365	4.927	6.81258	0.298	20.78	5.131		99.2266
K-M 28	gnt in xen, 15x12mm	42.699	0.843	20.327	1.925	7.82238	0.247	21.53	4.354		99.7474
K-M 30	gnt in xen, 30x25mm	41.852	0.494	19.18	4.184	6.9207	0.356	19.875	5.55		98.4117
K-M 31	gnt in phl 15x9x2mm	42.237	0.692	19.534	4.098	6.9462	0.341	20.105	5.899		99.8522
K-M 34	gnt in xen, 20x17mm	42.061	0.036	16.055	10.029	6.10572	0.359	23.036	2.005		99.6867
K-M 43	gnt in xen, 20x13mm с gnt 1x1mm violet	42.643	0.877	20.383	2.016	7.71222	0.247	21.366	4.351		99.6852
50G	Nv Gnt 2x2mm in xen 15x12mm	41.51	1.198	19.873	1.017	10.5478	0.268	21.0773	4.504	0.102	100.097
58G	Nv xen58G gnt	41.556	1.044	20.126	1.171	9.23508	0.237	22.2156	4.401	0.082	37.3417
60G	Nv Gnt 0,5x0,5mm in xen60G 12x6mm	41.625	0.023	19.97	4.343	7.23282	0.345	23.9771	2.34	0.012	99.868
60G	Nv Gnt 0,5x0,5mm in xen60G 12x6mm	41.396	0	19.528	5.299	7.34706	0.351	23.2172	2.59	0.049	99.7773
66G	Nv gnt in xen 50x30mm	42.312	0	20.541	4.479	7.03596	0.362	21.217	4.008	0.026	99.981
66G	Nv gnt in xen 50x30mm	42.195	0	20.813	4.742	7.04922	0.33	21.366	3.808	0.071	100.374
67G	Nv gnt in xen 30x20mm	42.306	0.257	20.566	2.629	7.29504	0.237	21.694	4.533	0.042	99.559
68G	Nv gnt in xen 55x30	41.777	1.144	18.156	5.308	7.28484	0.321	20.578	5.385	0.113	100.067
72G	Nv gnt in xen 27x15mm	41.853	0.558	19.535	4.786	6.69732	0.275	21.132	4.572	0.018	99.4263
73G	Nv gnt in xen 30x20mm	41.799	0.301	16.624	9.068	6.05064	0.305	21.85	3.463	0.087	99.5476
74G	Nv gnt in xen 20x12mm	41.517	0.753	18.567	5.019	7.36848	0.359	20.221	5.431	0.113	99.3485
77G	Nv gnt in xen 26x24mm	41.262	0.458	16.91	7.984	6.936	0.354	20.022	5.394	0.223	99.543
79G	Nv gnt in xen 60x35mm	42.072	0.059	16.956	9.368	6.82992	0.342	23.228	1.61	0.038	100.503
7D-1\4		42.227	0.022	21.568	3.173	6.872	0.362	20.554	4.525	0	0
Zapolarnaya	gnt с pxn срост	40.5	0	21.49	0.78	14.33	0.48	15.95	4.87		98.4
Zapolarnaya	gnt in gnt serp-t 60x40mm	39.325	1.083	18.694	2.437	8.96896	0.31	23.3484	5.073		99.2394
ЗП 106\280 s-t		40.876	0.712	18.421	5.626	7.449	0.295	20.572	5.058	0.089	99.098
ЗП 106\280 s-t		41.174	0.587	18.404	5.847	7.229	0.336	20.641	4.81	0.054	99.082
ЗП 106\285 s-t		40.896	0	21.663	3.47	7.83	0.475	20.519	4.369	0.013	99.235
ЗП 106\285 s-t		41.462	0	21.772	3.338	7.836	0.467	20.83	4.329	0.037	100.071
ЗП 106\286 s-t		41.89	0.027	21.555	3.613	6.99	0.332	23.689	1.675	0.082	99.853
ЗП 106\289 s-t		41.498	0.039	21.525	3.099	7.145	0.365	21.15	4.343	0.049	99.213
ЗП 114\300 s-t		41.284	0.213	20.478	4.496	7.22	0.372	21.288	3.812	0.061	99.224
ЗП 114\300 s-t		41.214	0.15	20.732	4.075	7.322	0.344	21.869	3.816	0.063	99.585
hi-Ti grt from sheared peridotites	0.375
low-Ti grt from granular peridotites	0.625
Garnet in megacrysts olivine
52G	Nv Gnt 3x2mm in Ol 30x15mm	41.042	0.017	16.06	9.801	6.75138	0.368	24.7075	1.161	0	99.9078
65G	Nv Gnt 3x2mm in Ol 30x18mm	41.57	0.61	20.13	4.62	5.51	0.46	21.36	4.81	0	98.74
92G	Nv gnt 4x3mm	42.555	0.457	21.044	2.797	6.88908	0.218	20.969	4.421	0.052	99.4021
61G	Nv Gnt 5x5mm in Ol 40x30mm	41.807	0.393	20.524	2.631	7.22976	0.287	22.8694	4.171	0.015	99.9272
63G (1)	Nv Gnt in Ol 12x11mm	40.93	0.058	15.622	9.775	6.9615	0.35	23.3549	2.517	0.022	99.5904
62G	Nv gnt in Ol 14x10mm	41.997	0	21.36	3.261	7.40928	0.339	25.0237	1.167	0.015	100.572
78G	Nv gnt in ol 25x10mm	42.228	0.018	20.875	4.09	6.98088	0.365	21.315	3.666	0.115	99.6529
70G	Nv gnt in ol 40x10mm	41.838	0.016	16.769	9.333	6.72486	0.343	23.661	1.113	0.03	99.8279
K-M 29	gnt+ol в ol 25x13mm	42.377	0.047	18.084	7.873	6.58512	0.336	23.425	1.292		100.019
53G	Nv Gnt 16x8mm	42.112	0.929	20.693	1.01	9.99804	0.263	21.7974	4.258	0.104	101.164
88G	Nv mega ol 25x20mm	41.34	0.704	16.877	7.321	6.52596	0.343	20.7	5.108	0.277	99.196
Megacrysts garnet
5G	Nv Gnt 6x5mm	41.738	0.67	20.522	2.227	8.2518	0.332	21.3741	4.336	0.073	99.5239
6G	Nv Gnt 6x5mm	40.853	0.524	17.103	6.841	6.86664	0.311	21.5679	5.283	0.09	99.4395
7G	Nv Gnt 9x7mm	40.834	0.496	16.956	7.108	6.89622	0.274	21.4781	5.333	0.09	99.4654
7G	Nv Gnt 9x7mm	40.771	0.528	17.166	7.056	6.82482	0.327	21.4822	5.291	0.106	99.552
9G	Nv Gnt 6x5mm	42.023	0.893	20.012	2.157	8.05392	0.219	22.2187	4.387	0.093	100.057
10G	Nv Gnt 7x6mm	41.473	0.882	19.639	2.276	7.97232	0.277	22.2554	4.373	0.093	99.2407
11G	Nv Gnt 6x4mm	41.685	0.341	20.301	3.182	7.28178	0.29	22.0718	4.605	0.063	99.8206
15G	Nv Gnt 10x8mm	41.399	0.691	19.992	2.635	9.69	0.394	20.5193	4.792	0.044	100.156
19G	Nv Gnt 20x12mm kk0,6mm	41.382	1.04	20.151	1.234	9.34116	0.28	21.5893	4.353	0.098	99.4685
21G	Nv Gnt 10x5mm kk-0,3mm	41.952	0.898	21.052	0.284	9.02802	0.259	22.39	4.105	0.102	100.07
22G	Nv Gnt 10x6mm	41.333	1.157	19.549	0.897	10.6978	0.259	20.8702	4.555	0.14	99.458
23G	Nv 415/125 Gnt 20x13mm kk-0,5mm	41.113	0.903	20.372	1.252	9.31362	0.278	21.4027	4.422	0.101	99.1573
24G	Nv 410/83 Gnt 17x5mm kk-0,3	43.255	0.902	12.383	0.316	9.83382	0.316	23.1418	3.17	0.055	93.3726
25G	Nv Gnt 10x7mm kk-0,2mm	41.32	0.531	18.467	5.586	7.21446	0.421	21.3353	5.127	0.034	100.036
27G	Nv 413/231, Gnt 40x8mm kk-0,5mm	41.379	0.991	19.462	2.226	8.1855	0.241	22.4063	4.448	0.097	99.4358
27G	Nv 413/231, Gnt 40x8mm kk-0,5mm	41.814	0.919	19.584	2.222	8.27832	0.236	22.5369	4.422	0.109	100.121
28G	Nv Gnt 10x5mm	41.232	0.952	18.478	3.907	9.51048	0.304	20.6754	4.835	0.116	100.01
29G	Nv Gnt 10x7mm kk-0,3mm	40.261	0.738	21.191	0.122	17.0911	0.324	10.9823	9.866	0.242	100.817
30G	Nv Gnt 20x9mm kk0,3mm	41.794	1.123	19.24	3.409	8.15898	0.287	21.6903	4.811	0.073	100.586
31G	Nv Gnt 20x15mm kk-0,4mm	41.225	0.434	18.717	4.668	8.57412	0.327	21.3608	4.856	0.009	100.171
32G	Nv Gnt 6x5mm	41.417	0.897	18.484	4.957	7.25016	0.299	21.8576	4.774	0.15	100.086
33G	Nv Gnt 8x7mm	41.995	1.113	20.1	1.246	9.38604	0.226	21.7342	4.43	0.097	100.327
34G	Nv Gnt 17x7 kk-0,4mm	41.719	0.906	19.915	1.908	7.97538	0.251	22.4074	4.366	0.06	99.5077
35G	Nv Gnt 8x5mm	41.424	0.129	19.194	5.285	6.68406	0.331	22.4696	4.129	0.051	99.6966
36G	Nv Gnt 7x5mm	42.132	1.017	20.358	1.207	9.42072	0.247	22.1575	4.307	0.097	100.943
37G	Nv Gnt 6x4mm	41.616	0.542	19.188	4.49	7.10328	0.281	22.0718	4.362	0.079	99.7331
39G	Nv Gnt 13x8mm	41.88	0.618	21.401	1.45	7.08798	0.29	22.9979	3.969	0.144	99.8379
41G	Nv Gnt 6x4mm	41.11	0.875	19.944	1.584	9.21978	0.239	21.42	4.404	0.098	98.8938
42G	Nv Gnt 9x7mm	41.555	1.006	20.53	0.973	9.6747	0.245	21.6791	4.04	0.104	99.8068
43G	Nv Gnt 9x4mm kk-0,2	40.844	1.089	19.654	0.866	10.3244	0.27	21.0508	4.298	0.102	98.4982
44G	Nv Gnt 12x10mm kk-0,3	41.655	0.555	21.368	1.42	6.84624	0.273	23.053	4.412	0.073	99.6553
45G	Nv Gnt 14x8mm kk-0,3	41.217	1.041	20.452	0.922	10.5264	0.233	21.1844	4.361	0.108	100.045
46G	Nv Gnt 13x8mm kk-0,2	41.377	1.133	19.838	0.886	10.3489	0.233	21.215	4.426	0.13	99.5869
46G	Nv Gnt 13x8mm kk-0,3	41.559	1.077	20.117	0.935	10.2541	0.225	21.4608	4.336	0.111	100.075
47G	Nv Gnt 12x10mm	41.045	1.034	20.286	0.956	10.0919	0.299	21.1813	4.345	0.08	99.3182
48G	Nv Gnt 30x10mm	40.763	0.843	19.525	1.624	8.13348	0.2	21.9443	4.342	0.156	97.5308
49G	Nv Gnt 11x9mm	41.403	0.002	16.419	9.334	6.64428	0.361	24.6616	0.96	0.043	99.8278
54G	Nv Gnt 6x3mm	41.51	1.04	20.314	1.222	9.3636	0.255	22.0228	4.31	0.091	100.128
71G	Nv mega gnt 26x20	42.156	1.016	21.15	0.913	9.61554	0.248	20.247	4.315	0.207	99.8675
76G	Nv gnt 14x7mm	41.722	1.03	21.077	0.986	9.97968	0.263	20.265	4.305	0.118	99.7457
93G	ПСК	42.055	0.284	19.295	5.008	7.49904	0.323	20.334	5.314	0.064	100.176
K-M 1	gnt 16x5	42.365	0.498	21.659	2.359	6.63204	0.286	21.732	3.749	0.166	99.446
K-M 2	gnt 10x7	42.387	0.895	21.006	1.249	8.364	0.24	21.284	4.292	0.076	99.793
K-M 3	gnt 9x6	41.969	0.281	20.673	3.314	6.97986	0.311	21.06	4.457	0.031	99.0759
K-M 4	gnt 11x8	42.464	0.907	20.751	1.551	8.5119	0.224	21.059	4.367	0.079	99.9139
K-M 5	gnt 10x8	41.902	1.052	19.485	3.192	8.08758	0.311	20.277	5.087	0.216	99.6096
K-M 7	gnt 14x7	42.817	0.85	21.043	1.4	8.35584	0.245	21.414	4.236	0.131	100.492
K-M 8	gnt 8x6	42.685	0.848	20.796	1.807	8.568	0.254	21.035	4.427	0.04	100.46
K-M 9	gnt 8x4	42.345	0.899	21.145	1.078	8.63226	0.295	20.894	4.301	0.073	99.6623
K-M 10	gnt 27x18	42.814	0.974	21.15	1.069	9.0321	0.266	21.228	4.239	0.066	100.838
K-M 12	gnt 8x6	42.308	0.18	19.594	5.343	6.82074	0.385	21.177	4.277	0.082	100.167
K-M 13	gnt 8x7	42.115	0.502	19.333	5.139	7.01148	0.365	19.879	6.021	0.056	100.421
K-M 14	gnt 9x6	41.783	0.451	18.484	6.17	7.16142	0.385	19.991	5.375	0.06	99.8604
K-M 15	gnt 7x5	42.22	0.351	20.192	4.486	6.63408	0.323	20.971	4.897	0.032	100.106
K-M 17	gnt 7x6	40.996	0.017	0	0.044	6.82686	0.092	50.45	0.013	0.005	98.4439
K-M 18	gnt 10x11	42.453	0.839	20.941	1.428	8.48946	0.258	20.982	4.394	0.047	99.8315
K-M 19	gnt 9x7	42.716	0.906	20.828	1.337	8.27934	0.236	21.207	4.257	0.089	99.8553
K-M 20	gnt 10x5	42.501	0.813	20.256	2.245	7.86828	0.259	21.424	4.459	0.079	99.9043
K-M 21	gnt 11x2	42.257	0.928	20.254	2.377	8.01414	0.276	20.958	4.539	0.142	99.7451
K-M 24	gnt 45x30	42.402	0.426	20.933	2.772	7.57656	0.299	21.068	4.358	0.105	99.9396
K-M 40	gnt 6x6mm	42.3	0.455	19.853	4.03	6.91662	0.284	20.977	4.645	0.1	99.5696
K-M 41	gnt 9x8mm	42.301	0.208	19.44	5.288	6.84114	0.348	21.171	4.21	0.072	99.8891
Zp 1	gnt 15x13мм	41.7	1.072	19.042	0.76	10.4603	0.244	22.8712	4.431	0.09	100.671
Zp 2	gnt 15x13мм	36.456	1.113	18.988	0.719	10.4759	0.28	22.4721	4.385	0.127	95.0161
Zp 3	gnt 15x13мм	37.117	1.204	18.946	0.735	10.608	0.274	22.7297	4.378	0.082	96.0737
Zp 4	gnt 10x4мм	37.885	0.615	20.794	0.15	10.7401	0.183	17.281	9.264	0.246	97.1581
Zp 5	gnt 10x4мм	40.4	0.64	20.993	0.108	10.8306	0.201	17.4938	9.269	0.269	100.204
Zp 6	gnt 10x4мм	38.714	0.658	20.815	0.088	10.6735	0.13	17.5065	9.514	0.191	98.29
1 Gz	gnt 9x6mm	41.805	1.052	21.577	0.351	10.337	0.206	19.932	4.269	0.099	99.628
2 Gz	gnt 27x14mm	41.456	1.242	20.755	0.931	10.217	0.286	20.376	4.183	0.129	99.575
3 Gz	gnt 15x7mm	40.904	1.096	20.776	0.752	10.005	0.241	20.126	4.304	0.286	98.49
4 Gz	gnt 30x10mm	41.802	1.12	20.891	0.917	9.838	0.288	20.559	4.371	0.131	99.917
5 Gz	gnt 10x9mm	41.924	1.108	20.669	0.91	10.215	0.254	20.464	4.283	0.115	99.942
6 Gz	gnt 8x7mm	41.729	0.619	19.331	4.748	7.168	0.291	21.273	4.38	0.164	99.703
8 Gz	gnt 17x7mm	41.143	0.934	21.098	0.807	10.243	0.281	19.851	4.64	0.153	99.15
9 Gz	gnt 9x7mm	41.519	1.098	21.224	0.487	10.995	0.305	19.628	4.42	0.138	99.814
10 Gz	gnt 14x7	40.968	1.147	20.794	0.735	10.092	0.274	19.945	4.151	1.185	99.291
11 Gz	gnt 20x20mm	41.672	0.938	19.812	3.406	7.951	0.295	20.716	4.873	0.093	99.756
12 Gz	gnt 9x8mm	41.162	0.458	18.656	5.715	8.692	0.352	20.009	4.758	0.06	99.862
13 Gz	gnt 15x10mm	41.436	1.222	20.68	0.916	10.272	0.261	20.198	4.47	0.134	99.589
14 Gz	gnt 16x13mm	42.328	0.905	21.29	1.339	8.042	0.262	21.63	4.363	0.107	100.266
16 Gz	gnt 15x14mm	41.615	1.225	21.052	0.951	10.164	0.289	20.318	4.541	0.11	100.265
17 Gz	gnt 30x20mm	42.184	0.058	23.906	0.269	7.295	0.229	21.942	4.045	0.055	99.983
18 Gz	gnt 25x17mm толст. kk	41.315	1.163	19.391	3.351	8.283	0.33	20.148	5.037	0.056	99.074
19 Gz	gnt 13x10mm	42.164	0.858	20.738	1.729	7.917	0.239	21.467	4.43	0.086	99.628
20 Gz	gnt 7x6mm	42.142	0.995	20.109	2.617	8.111	0.252	21.06	4.556	0.164	100.006
21 Gz	gnt 7x5mm	41.695	0.271	20.73	3.471	7.4	0.299	21.08	4.664	0.06	99.67
23 Gz	gnt 12x7 толст. kk	41.281	0.844	20.55	2.244	9.37	0.352	18.985	5.661	0.095	99.382
24 Gz	gnt 15x12mm толст. Kk	41.582	0.238	19.948	4.432	7.354	0.314	20.477	4.875	0.08	99.3
25 Gz	gnt 10x4mm	42.044	0.202	20.053	3.929	7.345	0.285	21.042	4.872	0.055	99.827
25 Gz	gnt 10x4mm	41.741	0.396	19.247	4.73	7.697	0.333	20.511	5.053	0.075	99.783
ЗП 114\233	gnt 12x8mm	42.075	0.169	20.805	3.625	7.316	0.303	21.049	4.7	0.071	100.113
ЗП 126\123	gnt 17x13mm	40.985	1.329	20.707	0.663	11.308	0.275	19.44	4.582	0.147	99.436
ЗП 114\373	gnt 28x15mm	41.338	1.079	20.684	0.894	10.306	0.263	20.104	4.327	0.11	99.105
ЗП 114\373	gnt 17x10mm	41.484	1.12	20.994	0.76	10.293	0.246	20.234	4.26	0.088	99.479
ЗП 114\373	gnt 17x10mm	42.12	1.118	20.766	0.873	10.43	0.267	20.272	4.228	0.137	100.211
ЗП 106\280	gnt 17x15mm	41.379	1.003	20.923	1.144	9.159	0.234	21.046	4.243	0.04	99.171
31 Gz	gnt 15x7mm	41.654	1.141	21.179	0.825	9.861	0.283	20.562	4.348	0.096	99.949
ЗП 114\300	gnt 9x6mm	41.588	0.416	21.142	2.836	7.553	0.316	21.194	4.347	0.078	99.47

## Sheet: Cromite
Composition of Cr-spinel from the Upper Muna kimberlites, wt%.
№	Pipe	Type	TiO2	Al2O3	Cr2O3	FeO	MnO	NiO	MgO	Total	№ anions pfu	Ti	Al	Cr	Fe++	Mn	Ni	Mg	Total	End-members	Spinel	Hercynite	Galaxite	Gahnite	Trevorite	Magnetite	Chromite	Ulvöspinel	Mg/(Mg+Fe2)	Fe2/(Fe2+Fe3)	Al/(Al+Fe3+Cr)
328/6im11-8	Komsomolskaya-M	groundmass	4.706	8.815	48.135	24.454	0.319	0	13.41	99.839	4	0.117543	0.344978	1.26372	0.679078	0.00897201	0	0.663821	3.07811		0.646976	-0.487609	0.00874434	0	0	0.101504	0.615824	0.11456	0.585067	0.693272	0.189863
328/6im11-9	Komsomolskaya-M	groundmass	4.672	7.73	49.508	23.768	0.365	0	13.31	99.353	4	0.117695	0.305112	1.31092	0.665691	0.0103539	0	0.664524	3.07429		0.648466	-0.5097	0.0101037	0	0	0.0966619	0.639618	0.11485	0.586981	0.702398	0.168186
8d/257im26-7	Deimos	groundmass	4.747	8.264	49.499	19.613	0.521	0	17.234	99.878	4	0.116129	0.316766	1.27281	0.533448	0.0143521	0	0.835578	3.08908		0.811481	-0.671604	0.0139382	0	0	0.115352	0.618052	0.11278	0.738488	0.554681	0.173368
8d/119im31-4	Deimos	groundmass	5.186	8.121	50.029	24.745	0.333	0.214	12.681	101.309	4	0.128379	0.314989	1.30175	0.681042	0.00928239	0.00566535	0.622146	3.06325		0.6093	-0.469696	0.00909072	0	0.00554836	0.0825952	0.637435	0.125728	0.548381	0.75233	0.176424
M3/1	Deimos	groundmass	4.96	9.62	46.12	23.05	0.38		12.18	96.31	4	0.127638	0.387883	1.24748	0.659473	0.0110113	0	0.621192	3.05468		0.610073	-0.430417	0.0108142	0	0	0.0716007	0.612576	0.125354	0.547376	0.778897	0.217768
122/352im49-6	Zapolarnaya	groundmass	5.224	6.919	49.996	24.058	0.364	0	13.452	100.013	4	0.13113	0.272124	1.3191	0.671403	0.0102886	0	0.669211	3.07326		0.653259	-0.530484	0.0100433	0	0	0.0953489	0.643829	0.128004	0.584331	0.709036	0.152316
m5-7c	Zapolarnaya	groundmass	5.81	6.33	44.7	25.98	0.82	0.27	12.39	96.3	4	0.153272	0.261647	1.23948	0.761995	0.0243588	0.00761734	0.647794	3.09616		0.627674	-0.531897	0.0236022	0	0.00738075	0.124237	0.600491	0.148511	0.561663	0.663464	0.148869
m5-8r	Zapolarnaya	groundmass	4.23	2.46	47.95	29.47	0.7	0.31	9.6	94.72	4	0.118527	0.108003	1.41224	0.918083	0.0220866	0.00928944	0.533121	3.12135		0.512394	-0.490648	0.0212279	0	0.00892829	0.155511	0.678669	0.113918	0.472792	0.647524	0.0585749
m5-1	Zapolarnaya	groundmass	4.86	7.04	48.21	22.93	0.58	0.14	12.1	95.86	4	0.127431	0.289225	1.32868	0.668449	0.0171246	0.00392571	0.628784	3.06362		0.615727	-0.494731	0.016769	0	0.00384419	0.083062	0.650544	0.124784	0.557638	0.746208	0.1618
M5-8c	Zapolarnaya	groundmass	4.67	7.03	49.29	22.16	0.86	0.21	12.9	97.12	4	0.120538	0.284307	1.33724	0.635919	0.0249954	0.00579665	0.659894	3.06869		0.645123	-0.536254	0.0244359	0	0.0056669	0.0895353	0.653654	0.117839	0.593087	0.711959	0.157535
02/100im58-2c	Poiskovaya	groundmass	6.079	11.103	43.849	22.975	0.55	0.104	14.622	99.282	4	0.149507	0.427855	1.13353	0.62822	0.0152317	0.00273537	0.712715	3.0698		0.69651	-0.505005	0.0148854	0	0.00267317	0.0909482	0.553881	0.146108	0.617172	0.703721	0.244836
02/100im58-3c	Poiskovaya	groundmass	6.419	10.153	44.898	22.859	0.601	0.079	14.564	99.573	4	0.157978	0.391516	1.16145	0.625479	0.0166556	0.00207926	0.710377	3.06554		0.69519	-0.521951	0.0162995	0	0.00203481	0.0855154	0.568311	0.154601	0.61182	0.720587	0.226606
m-7-19	Poiskovaya	groundmass	4.34	9.8	45.33	23.43	0.54	0.25	11.39	95.08	4	0.113701	0.402279	1.24826	0.682455	0.0159303	0.00700435	0.591395	3.06103		0.579605	-0.404953	0.0156127	0	0.0068647	0.0797482	0.611688	0.111434	0.532257	0.761536	0.221851
m-7-10	Poiskovaya	groundmass	4.8	6.99	47.06	24.69	0.74	0.21	11.2	95.69	4	0.12721	0.290258	1.31093	0.727493	0.0220835	0.00595187	0.588272	3.0722		0.574448	-0.460106	0.0215646	0	0.005812	0.0940003	0.64006	0.124221	0.523728	0.735358	0.16182
m-7-19c	Poiskovaya	groundmass	4.57	7.31	47.77	24.25	0.68	0.15	11.01	95.74	4	0.120784	0.302716	1.32707	0.712574	0.0202375	0.00423971	0.576711	3.06433		0.564604	-0.440387	0.0198126	0	0.00415071	0.0839676	0.649604	0.118248	0.515957	0.759273	0.168053
m-7-1	Poiskovaya	groundmass	4.46	6.85	49.17	23.35	0.64	0.21	10.69	95.37	4	0.118431	0.285003	1.37239	0.689359	0.0191367	0.00596354	0.562586	3.05287		0.552843	-0.437475	0.0188053	0	0.00586026	0.0692745	0.674312	0.11638	0.506399	0.795476	0.158477
m9-all-1-1	Zimnaya	groundmass	4.85	6.97	48.32	22.77	0.8	0.2	12.17	96.08	4	0.126951	0.285859	1.32943	0.662648	0.0235797	0.00559855	0.631339	3.0654		0.617869	-0.506544	0.0230766	0	0.0054791	0.0853458	0.650532	0.124242	0.56391	0.736794	0.159724
m9-all1-2	Zimnaya	groundmass	5.19	6.47	48.64	21.29	1.17	0.16	14.13	97.05	4	0.133558	0.260876	1.31566	0.609125	0.0339036	0.00440328	0.720651	3.07817		0.702349	-0.612558	0.0330425	0	0.00429146	0.101586	0.641122	0.130167	0.642687	0.657761	0.146149
m9-3c	Zimnaya	groundmass	4.54	6.12	49.32	23.01	0.87	0.28	11.83	95.97	4	0.119843	0.253125	1.36844	0.675305	0.0258602	0.00790438	0.6189	3.06938		0.604911	-0.514211	0.0252757	0	0.00772572	0.09041	0.668754	0.117134	0.557968	0.726047	0.140114
m-4-1c	Novinka	groundmass	5.74	6.54	47.84	24.82	0.68		10.83	96.45	4	0.150951	0.269481	1.32239	0.725692	0.0201367	0	0.564458	3.05311		0.554639	-0.442029	0.0197864	0	0	0.069584	0.649694	0.148325	0.491466	0.804832	0.155454
5D\10	Deimos	concentrates	3.2	6.2	53.1	25.0999	0.4		10.6	98.5999	4	0.0830864	0.252231	1.44917	0.724566	0.0116949	0	0.545463	3.06621		0.533684	-0.421734	0.0114423	0	0	0.0863766	0.708939	0.0812922	0.49884	0.756315	0.13431
5D\10	Deimos	concentrates	4.6	1.8	43.7	40.6998	0.4		7.1323	98.3321	4	0.129426	0.0793528	1.29238	1.27316	0.012673	0	0.397715	3.18471		0.374649	-0.349211	0.011938	0	0	0.231992	0.608713	0.12192	0.337527	0.613126	0.0425647
5D\10	Deimos	concentrates	0.1	15	54.3	16.6	0.3		12.4	98.7	4	0.00243257	0.571718	1.38838	0.44895	0.00821753	0	0.597813	3.01752		0.594343	-0.318313	0.00816983	0	0	0.0232191	0.690163	0.00241845	0.597781	0.895959	0.284889
5D\10	Deimos	concentrates	2.7	1.3	56.7	28.1999	0.5		8.8	98.1999	4	0.0733656	0.0553475	1.61941	0.851929	0.0152987	0	0.473904	3.08926		0.460212	-0.448194	0.0148567	0	0	0.115569	0.786311	0.0712459	0.435646	0.720617	0.0289358
5D\10	Deimos	concentrates	0.2	11	54.4	21.9999	0.4		10.5	98.4999	4	0.00507155	0.437048	1.44996	0.620238	0.0114216	0	0.52769	3.05143		0.518797	-0.315185	0.0112291	0	0	0.0674126	0.71276	0.00498608	0.522056	0.778897	0.215918
5D\10	Deimos	concentrates	0.2	15.6	49.1	19.3	0.3		13.9	98.4	4	0.00488336	0.596814	1.26013	0.523929	0.00824832	0	0.67264	3.06664		0.658022	-0.374169	0.00806907	0	0	0.0869281	0.616372	0.00477723	0.660195	0.660797	0.293323
5D\10	Deimos	concentrates	0.5	8.6	53.4	26.2999	0.5		9	98.2999	4	0.013068	0.352179	1.46698	0.764221	0.0147151	0	0.466187	3.07735		0.454469	-0.297151	0.0143452	0	0	0.100543	0.715054	0.0127395	0.4552	0.73009	0.173878
5D\10	Deimos	concentrates	0.7	6.6	55.1	25.7999	0.4		10.4	98.9999	4	0.0182373	0.269421	1.50889	0.747319	0.0117348	0	0.537	3.09261		0.52092	-0.401626	0.0113835	0	0	0.119777	0.731855	0.0176912	0.517654	0.669555	0.13303
5D\30 ,	Deimos	concentrates	2.9	2	58.4	27.6998	0.4		9.2	100.6	4	0.0762869	0.0824343	1.61477	0.810131	0.0118486	0	0.479644	3.07511		0.467928	-0.439277	0.0115592	0	0	0.0977034	0.787663	0.0744235	0.440252	0.752757	0.0434436
5D\30 ,	Deimos	concentrates	0.1	16.1	49	21.8999	0.3		12	99.3999	4	0.00244254	0.616159	1.25801	0.594717	0.00825121	0	0.5809	3.06048		0.569421	-0.275517	0.00808817	0	0	0.0790404	0.616573	0.00239427	0.572682	0.728833	0.302717
5D\30 ,	Deimos	concentrates	2.4	1.4	58.5	27.0999	0.5		9.1	98.9999	4	0.0644068	0.0588674	1.65014	0.808564	0.0151094	0	0.483995	3.08109		0.471258	-0.45731	0.0147117	0	0	0.105271	0.803358	0.0627118	0.449673	0.732572	0.0305766
5D\30 ,	Deimos	concentrates	3.27	6.25	55.44	17.64	0.48		14.51	97.59	4	0.0830219	0.248629	1.4795	0.497931	0.0137228	0	0.730116	3.05292		0.717461	-0.608786	0.0134849	0	0	0.0693316	0.726926	0.0815829	0.671718	0.716609	0.133011
5D-4\25	Deimos	concentrates	2.4	1.4	57.2	27.0999	0.6		9.1	97.7999	4	0.0652548	0.0596425	1.63472	0.819211	0.01837	0	0.490368	3.08756		0.476461	-0.465334	0.017849	0	0	0.113442	0.794178	0.0634042	0.455701	0.714962	0.030937
5D-4\25	Deimos	concentrates	0.6	11.8	48.7	26.0998	0.4		11.21	98.8098	4	0.0152476	0.46985	1.30085	0.737421	0.0114464	0	0.564594	3.0994		0.546486	-0.330175	0.0110792	0	0	0.128288	0.629562	0.0147586	0.544483	0.640533	0.230797
5D-4\25	Deimos	concentrates	3.6	5.4	54.4	22.1999	0.4		12.2	98.1999	4	0.0929195	0.218386	1.47587	0.637063	0.0116257	0	0.624085	3.05995		0.611857	-0.516202	0.011398	0	0	0.0783689	0.723478	0.091099	0.566692	0.749052	0.117784
5D-4\25	Deimos	concentrates	2.6	1.4	57.2	27.4999	0.5		9.2	98.3999	4	0.0702485	0.0592677	1.62445	0.826079	0.0152121	0	0.492641	3.08789		0.478619	-0.464607	0.0147791	0	0	0.113857	0.789104	0.068249	0.454326	0.716268	0.0308992
5D-8\60	Deimos	concentrates	0.3	29.9	38.6	13.4517	0.3		15.5	98.0517	4	0.00675126	1.05429	0.913054	0.336563	0.00760222	0	0.691313	3.00958		0.689113	-0.171222	0.00757804	0	0	0.0127267	0.455074	0.00672978	0.689698	0.924131	0.529029
5D-8\60	Deimos	concentrates	0.1	28	40.9	15.0307	0.3		14.2	98.5307	4	0.00227681	0.998874	0.978803	0.380481	0.00769137	0	0.640758	3.00888		0.638866	-0.148572	0.00766866	0	0	0.0118109	0.487957	0.00227009	0.642334	0.937732	0.499095
6D\165	Deimos	concentrates	0.1	13.2	56.3	15.7764	0.3		12.7	98.3764	4	0.00245343	0.507427	1.45187	0.430335	0.00828801	0	0.617527	3.0179		0.613865	-0.369895	0.00823886	0	0	0.0237237	0.721629	0.00243888	0.617446	0.889085	0.252825
6D\165	Deimos	concentrates	0	9.1	57.9	19.183	0.4		11.2	97.783	4	0	0.364078	1.554	0.544591	0.0115012	0	0.566792	3.04096		0.559158	-0.390917	0.0113463	0	0	0.0538798	0.766533	0	0.565575	0.799426	0.179587
6D\165	Deimos	concentrates	0.2	7.1	62.1	14.7431	0.3		13.5	97.9431	4	0.0050479	0.280779	1.64747	0.413709	0.00852624	0	0.675295	3.03083		0.668426	-0.537904	0.00843952	0	0	0.0406852	0.815357	0.00499655	0.670735	0.801294	0.13966
6D\165	Deimos	concentrates	0.3	10.4	56	19.3616	0.4		11.7	98.1616	4	0.00757097	0.411235	1.48547	0.543248	0.011367	0	0.585188	3.04408		0.576714	-0.385277	0.0112024	0	0	0.0579187	0.73198	0.00746134	0.57888	0.783636	0.204163
6D\165	Deimos	concentrates	0.3	28.3	40.4	13.567	0.3		15.6	98.467	4	0.00677398	1.00123	0.958847	0.340591	0.0076278	0	0.698114	3.01319		0.695059	-0.204227	0.00759442	0	0	0.0175048	0.477325	0.00674433	0.69565	0.896758	0.50181
6D-20\185	Deimos	concentrates	0.2	32.1	36.8	15.0307	0.3		14.3	98.7307	4	0.00446293	1.12233	0.863144	0.372903	0.00753819	0	0.632419	3.0028		0.63183	-0.0787182	0.00753116	0	0	0.00372867	0.43117	0.00445877	0.633777	0.979983	0.563154
6D-20\185	Deimos	concentrates	0.2	14.9	50.7	19.6391	0.4		12.3	98.1391	4	0.00493773	0.576381	1.31568	0.53907	0.0111202	0	0.601841	3.04903		0.592163	-0.319548	0.0109414	0	0	0.0643233	0.647262	0.00485833	0.595787	0.757454	0.284941
6D-20\185	Deimos	concentrates	0	20.5	42.6	21.0782	0.2		14	98.3782	4	0	0.770492	1.0741	0.562145	0.00540224	0	0.665572	3.07771		0.648767	-0.278514	0.00526584	0	0	0.100993	0.523488	0	0.652202	0.631381	0.375519
6D-20\185	Deimos	concentrates	0.9	7.4	55.5	21.2047	0.3		11.9	97.2047	4	0.0233472	0.300781	1.51332	0.611577	0.00876334	0	0.611813	3.0696		0.59794	-0.459524	0.00856463	0	0	0.0906983	0.739503	0.0228178	0.589538	0.696514	0.150413
7D\50 ,	Deimos	concentrates	0.5	7.2	57.1	24.0998	0.4		10.7	99.9998	4	0.0127877	0.288525	1.53499	0.685274	0.0115197	0	0.542359	3.07546		0.529052	-0.399567	0.011237	0	0	0.0981384	0.748665	0.012474	0.528399	0.706375	0.1425
7D\50 ,	Deimos	concentrates	0	14.3	57.1	15.9	0.4		12.4	100.1	4	0	0.5388	1.44327	0.425097	0.0108313	0	0.590971	3.00897		0.58921	-0.331412	0.010799	0	0	0.0119196	0.719483	0	0.595642	0.943753	0.268597
7D\50 ,	Deimos	concentrates	0.1	8.4	59.3	17.3	0.3		13	98.4	4	0.0025193	0.331578	1.57029	0.484564	0.00851053	0	0.649086	3.04655		0.639169	-0.484293	0.0083805	0	0	0.0611146	0.773149	0.00248081	0.642962	0.743841	0.163662
7D\50 ,	Deimos	concentrates	1.8	7.5	57.9	18.6999	0.3		13.4	99.5999	4	0.0449435	0.293415	1.51956	0.519113	0.00843474	0	0.663099	3.04857		0.652535	-0.516465	0.00830036	0	0	0.0637253	0.747677	0.0442275	0.629905	0.750509	0.151051
7D\50 ,	Deimos	concentrates	0	7.4	59.8	19.9999	0.4		12.1	99.6999	4	0	0.2929	1.58784	0.561714	0.0113783	0	0.605795	3.05963		0.593988	-0.461549	0.0111565	0	0	0.0779557	0.778449	0	0.60069	0.716919	0.143596
7D\50 ,	Deimos	concentrates	2.1	5.9	57.4	21.9	0.4		12.1	99.8	4	0.0533855	0.235008	1.53377	0.618975	0.0114504	0	0.609633	3.06222		0.597245	-0.493346	0.0112177	0	0	0.0812799	0.751303	0.0523007	0.573677	0.731925	0.121469
7D-1	Deimos	concentrates	4.1	8.2	47	25.4999	0.3		12.7	97.7999	4	0.105511	0.33064	1.27133	0.729592	0.00869345	0	0.647736	3.0935		0.628158	-0.476265	0.00843068	0	0	0.120903	0.616452	0.102322	0.574241	0.658244	0.178598
7D-1	Deimos	concentrates	0	7.4	61.3	17.4999	0.4		11.5	98.0999	4	0	0.295896	1.64432	0.496529	0.0114947	0	0.581646	3.02989		0.575908	-0.4408	0.0113813	0	0	0.03946	0.814051	0	0.582538	0.839473	0.146489
7D-1	Deimos	concentrates	4.6	1.6	39.6	44.3998	0.4		6.2	96.7998	4	0.13382	0.0729307	1.21089	1.43606	0.0131033	0	0.357466	3.22427		0.332602	-0.310865	0.0121919	0	0	0.278226	0.563333	0.124512	0.299017	0.583547	0.0387544
7D-1	Deimos	concentrates	0	25.9	43.2	14.9	0.3		13.7	98	4	0	0.938085	1.04965	0.382938	0.00780896	0	0.627648	3.00613		0.626368	-0.166075	0.00779303	0	0	0.00815852	0.523756	0	0.631287	0.957303	0.468086
7D-12\110	Deimos	concentrates	0.33	9.29	58.35	14.19	0.94		13.49	96.59	4	0.00835113	0.368361	1.55209	0.399246	0.0267864	0	0.676585	3.03142		0.669572	-0.51381	0.0265088	0	0	0.0414618	0.768002	0.00826457	0.682015	0.790124	0.18379
7D-12\110	Deimos	concentrates	2.6	5.9	55.8	21.1999	0.4		12.649	98.5489	4	0.0666098	0.236833	1.5026	0.603844	0.0115393	0	0.642244	3.06367		0.628896	-0.52424	0.0112995	0	0	0.0831322	0.735687	0.0652254	0.596717	0.718813	0.124047
7D-12\110	Deimos	concentrates	0.5	7.6	54.9	23.9999	0.5		10.308	97.8079	4	0.0130637	0.311126	1.5077	0.69716	0.0147103	0	0.533765	3.07752		0.520319	-0.383015	0.0143398	0	0	0.100761	0.73486	0.0127346	0.521156	0.703468	0.1536
7D-13\120	Deimos	concentrates	0.1	13.7	51.9	20.0999	0.3		11.9	97.9999	4	0.00249227	0.534985	1.35959	0.556949	0.00841921	0	0.587788	3.05022		0.57811	-0.323303	0.00828059	0	0	0.0658594	0.668601	0.00245123	0.5815	0.759541	0.263735
7D-13\120	Deimos	concentrates	0.3	21.1	46.9	15.9999	0.3		13.706	98.3059	4	0.00708274	0.780528	1.16385	0.419976	0.00797548	0	0.641312	3.02073		0.636912	-0.257247	0.00792075	0	0	0.0274463	0.577933	0.00703414	0.637477	0.868393	0.390332
7D-13\120	Deimos	concentrates	0	12.5	56.6	17.7999	0.4		11.2	98.4999	4	0	0.486433	1.47757	0.491509	0.0111867	0	0.551295	3.018		0.548008	-0.317361	0.01112	0	0	0.023853	0.734381	0	0.55417	0.902357	0.241766
7D-13\120	Deimos	concentrates	0.3	16.4	46.7	23.3999	0.4		10.9	98.0999	4	0.00746068	0.639039	1.22073	0.64699	0.0112014	0	0.537233	3.06265		0.526243	-0.224232	0.0109723	0	0	0.0818306	0.597878	0.00730806	0.528178	0.741759	0.315287
7D-13\120	Deimos	concentrates	0	16.1	53.4	16.0999	0.4		12.6	98.5999	4	0	0.610232	1.35778	0.433006	0.0108958	0	0.604078	3.01599		0.600874	-0.308214	0.010838	0	0	0.0212111	0.675291	0	0.607458	0.901506	0.303498
7D-6\50	Deimos	concentrates	2.2	11.5	39.1	33.6883	0.4		10.3	97.1883	4	0.0581265	0.476075	1.08586	0.989596	0.0119006	0	0.539347	3.16091		0.511891	-0.297266	0.0112948	0	0	0.20362	0.515292	0.0551676	0.490377	0.566407	0.239112
7D-6\50	Deimos	concentrates	2.9	1.7	54.2	29.5961	0.5		9	97.8961	4	0.0791511	0.0726999	1.5549	0.898092	0.0153668	0	0.486834	3.10705		0.470061	-0.4498	0.0148374	0	0	0.137812	0.750666	0.0764241	0.442791	0.68215	0.0380019
11D\75	Deimos	concentrates	0.3	20.3	41.3	23.5058	0.3		13	98.7058	4	0.00724365	0.767995	1.04817	0.631012	0.00815667	0	0.622098	3.08467		0.605021	-0.239497	0.00793277	0	0	0.1098	0.509699	0.00704481	0.605559	0.642165	0.376106
11D\75	Deimos	concentrates	0.2	15.9	44.7	25.1877	0.4		12.1	98.4877	4	0.00497882	0.620183	1.16963	0.697127	0.0112127	0	0.596981	3.10011		0.577703	-0.288476	0.0108506	0	0	0.129175	0.56593	0.00481803	0.581209	0.617042	0.30153
11D\75	Deimos	concentrates	1.3	5.7	57.6	21.1323	0.4		12	98.1323	4	0.0336483	0.231164	1.56707	0.608125	0.0116583	0	0.615574	3.06724		0.60208	-0.500434	0.0114027	0	0	0.0876831	0.766358	0.0329107	0.589403	0.705165	0.116896
11D\75	Deimos	concentrates	0	4.2	63.9	17.852	0.4		12	98.352	4	0	0.170155	1.73666	0.513194	0.0116462	0	0.614935	3.04659		0.605531	-0.533223	0.0114681	0	0	0.0611724	0.855051	0	0.612556	0.757899	0.0837763
11D\75	Deimos	concentrates	0.5	10.9	57.3	17.4348	0.3		11.9	98.3348	4	0.0124792	0.426255	1.5032	0.483795	0.00843129	0	0.588631	3.02279		0.584192	-0.38104	0.00836771	0	0	0.0301612	0.745933	0.0123851	0.581855	0.874367	0.214173
11D\75	Deimos	concentrates	1.6	4.6	54.7	26.7851	0.4		10.5	98.5851	4	0.0423017	0.190556	1.52009	0.787332	0.0119084	0	0.550182	3.10237		0.532026	-0.451408	0.0115154	0	0	0.131994	0.734967	0.0409058	0.516836	0.653264	0.0960633
11D\75	Deimos	concentrates	0	17.5	47.2	17.3746	0.3		14.8	97.1746	4	0	0.666602	1.20612	0.469618	0.00821258	0	0.713088	3.06364		0.698276	-0.37994	0.00804198	0	0	0.0830904	0.590532	0	0.703937	0.63863	0.326378
11D\75	Deimos	concentrates	3.7	6.7	53.6	19.281	0.3		13.9	97.481	4	0.0942806	0.267499	1.43559	0.546233	0.00860791	0	0.701963	3.05417		0.689512	-0.56659	0.00845522	0	0	0.0709513	0.705063	0.0926083	0.635992	0.735524	0.144785
8	Deimos	concentrates	0.09	36.21	27.57	15.0599	0.2		19.28	98.4099	4	0.00195725	1.23384	0.630212	0.364128	0.00489768	0	0.83098	3.06602		0.813088	-0.214243	0.00479222	0	0	0.0861263	0.308321	0.00191511	0.815434	0.516535	0.604796
26	Deimos	concentrates	0.05	22.31	42.81	15.8398	0.26		16.88	98.1498	4	0.00116694	0.815837	1.05019	0.411012	0.00683292	0	0.780781	3.06582		0.764018	-0.371544	0.00668623	0	0	0.0858752	0.513822	0.00114188	0.768278	0.57296	0.399617
19	Deimos	concentrates	0.14	21.09	43.33	18.18	0.31		14.26	97.31	4	0.00335356	0.791554	1.09097	0.48417	0.00836171	0	0.676981	3.05539		0.664709	-0.284316	0.00821013	0	0	0.0725094	0.535595	0.00329277	0.667993	0.694949	0.389886
15	Deimos	concentrates	0.14	16.69	48.1	17.4599	0.28		15.26	97.9299	4	0.0033875	0.632752	1.22332	0.469697	0.00762894	0	0.731786	3.06858		0.715433	-0.413586	0.00745846	0	0	0.0893902	0.597992	0.00331179	0.718412	0.610671	0.310333
17	Deimos	concentrates	3.53	1.56	51.23	32.0399	0.57		9.33	98.2599	4	0.0965449	0.0668506	1.47273	0.974253	0.0175544	0	0.505726	3.13366		0.484155	-0.468961	0.0168056	0	0	0.170615	0.704958	0.0924269	0.450116	0.634146	0.0352584
24	Deimos	concentrates	0.41	14.23	52.24	19.09	0.34		12.15	98.46	4	0.0101038	0.549452	1.35316	0.523037	0.00943482	0	0.593409	3.03859		0.585873	-0.323951	0.00931499	0	0	0.050803	0.667985	0.00997543	0.585486	0.803239	0.27397
9	Deimos	concentrates	2.75	2.16	52.68	31.4499	0.49		8.44	97.9699	4	0.0754046	0.0927994	1.5183	0.958762	0.0151292	0	0.458656	3.11905		0.44115	-0.411073	0.0145518	0	0	0.152672	0.730173	0.0725266	0.416976	0.668886	0.0481186
20	Deimos	concentrates	0.17	13.48	53.46	17.1899	0.37		13.42	98.0899	4	0.00418629	0.520112	1.38374	0.470631	0.0102598	0	0.654956	3.04389		0.645513	-0.399318	0.0101119	0	0	0.0576722	0.681895	0.00412593	0.6494	0.75133	0.257368
23	Deimos	concentrates	0.1	10.59	55.5	19.67	0.42		11.5	97.78	4	0.00253602	0.420799	1.47942	0.554604	0.0119938	0	0.578003	3.04735		0.569021	-0.373698	0.0118074	0	0	0.0621585	0.728215	0.00249661	0.574368	0.772307	0.207649
12	Deimos	concentrates	0.42	10.12	56.03	19.37	0.4		11.57	97.91	4	0.0106409	0.401732	1.49209	0.545614	0.0114116	0	0.580955	3.04245		0.57285	-0.386038	0.0112524	0	0	0.0558059	0.735638	0.0104925	0.573285	0.792544	0.200164
25	Deimos	concentrates	1.45	5.46	58.09	19.6599	0.35		12.77	97.7799	4	0.0374481	0.220943	1.57692	0.564508	0.0101785	0	0.653629	3.06362		0.640055	-0.541845	0.00996716	0	0	0.0830685	0.772084	0.0366704	0.623408	0.699454	0.112295
16	Deimos	concentrates	0.16	6.88	59.14	19.2299	0.36		12.52	98.2899	4	0.00409386	0.275821	1.59052	0.547037	0.0103722	0	0.634887	3.06273		0.621883	-0.496957	0.0101598	0	0	0.0819322	0.778972	0.00401001	0.625731	0.694187	0.13563
10	Deimos	concentrates	0.06	5.49	61.86	18.2899	0.42		11.91	98.0299	4	0.00154872	0.222034	1.67833	0.52488	0.0122075	0	0.609273	3.04827		0.599625	-0.50238	0.0120142	0	0	0.0633416	0.825875	0.00152419	0.605982	0.75476	0.109426
22	Deimos	concentrates	0	3.57	63.9	17.86	0.36		10.82	96.51	4	0	0.148328	1.78105	0.526547	0.0107495	0	0.568638	3.03531		0.562023	-0.499346	0.0106244	0	0	0.0465343	0.880164	0	0.568058	0.821167	0.0733013
11	Deimos	concentrates	0.01	4.87	63.96	16.21	0.39		12.71	98.15	4	0.000256476	0.195705	1.72425	0.462227	0.0112633	0	0.646059	3.03976		0.637607	-0.552151	0.011116	0	0	0.0523255	0.850849	0.000253121	0.64461	0.770593	0.096597
11D\75	Deimos	concentrates	0	5.1	65.3	14.8848	0.4		12.5	98.1848	4	0	0.203961	1.7519	0.422395	0.0114965	0	0.632323	3.02207		0.627705	-0.537882	0.0114125	0	0	0.0292139	0.869551	0	0.634951	0.860658	0.101235
7D-12\110	Deimos	concentrates	0	4.6	63.4	16.7999	0.4		13.126	98.3259	4	0	0.184909	1.70966	0.479191	0.0115555	0	0.6674	3.05272		0.655875	-0.576373	0.011356	0	0	0.0690739	0.840068	0	0.663409	0.706641	0.0908581
7D\40 5	Deimos	concentrates	0.3	7.2	62.1	17.4999	0.4		12.1	99.5999	4	0.00753202	0.283236	1.6388	0.488486	0.0113085	0	0.602081	3.03145		0.595835	-0.466877	0.0111912	0	0	0.0414952	0.810902	0.00745388	0.59807	0.828326	0.141201
7D\40 5	Deimos	concentrates	2.5	1.4	58.8	26.4999	0.5		9.5	99.1999	4	0.0667328	0.0585536	1.64977	0.78645	0.0150288	0	0.502577	3.07911		0.489665	-0.475783	0.0146427	0	0	0.102767	0.80369	0.0650184	0.46618	0.731765	0.0305082
5D-4\25	Deimos	concentrates	0.1	10.2	58.4	17.9	0.4		11.4	98.4	4	0.00251265	0.401567	1.54238	0.500047	0.0113174	0	0.567696	3.02552		0.562908	-0.37504	0.011222	0	0	0.0337342	0.764684	0.00249146	0.567866	0.863928	0.199588
5D-4\25	Deimos	concentrates	0.2	7.5	61.2	15.6999	0.3		14.296	99.1959	4	0.00497995	0.292605	1.60174	0.434628	0.00841146	0	0.705486	3.04785		0.69441	-0.558684	0.00827941	0	0	0.0627963	0.788296	0.00490177	0.696764	0.706425	0.144715
5D-4\25	Deimos	concentrates	14.9	4.7	39.8	30.2999	2.2		13.1	105	4	0.359633	0.177745	1.00972	0.813093	0.0597932	0	0.626648	3.04663		0.617056	-0.588422	0.0588779	0	0	0.0612267	0.497133	0.354128	0.476399	0.847057	0.135495
5D\10	Deimos	concentrates	0.1	9.2	58.3	19.5	0.4		11	98.5	4	0.0025369	0.365694	1.5546	0.550001	0.0114267	0	0.553064	3.03732		0.546269	-0.376955	0.0112863	0	0	0.0491464	0.767748	0.00250573	0.551108	0.819063	0.181054
5D\10	Deimos	concentrates	2.8	7.2	55.8	18.7	0.3		13.4	98.2	4	0.0708032	0.285268	1.48311	0.525729	0.00854224	0	0.67155	3.04501		0.661625	-0.529515	0.00841598	0	0	0.0591214	0.730596	0.0697567	0.623386	0.771714	0.151064
5D\10	Deimos	concentrates	0.5	13.9	46.1	24.1998	0.3		12.9	97.8998	4	0.0125658	0.547345	1.21777	0.676175	0.0084898	0	0.642524	3.10487		0.620821	-0.364595	0.00820304	0	0	0.135109	0.588321	0.0121414	0.618386	0.586402	0.267679
5D\10	Deimos	concentrates	4	1.5	47	38.1998	0.5		7.2	98.3998	4	0.111942	0.0657733	1.38253	1.18856	0.0157564	0	0.399341	3.1639		0.378653	-0.362411	0.0149402	0	0	0.207218	0.655456	0.106143	0.347006	0.632261	0.0348859
5D\10	Deimos	concentrates	3.7	12	41.9	28.0998	0.3		12.3	98.2998	4	0.0938959	0.477147	1.11765	0.792819	0.00857278	0	0.618627	3.10871		0.596994	-0.375037	0.008273	0	0	0.139875	0.539282	0.0906124	0.551578	0.634359	0.253171
5D\10	Deimos	concentrates	0.1	20.1	47.8	17.4999	0.3		12.9	98.6999	4	0.00237862	0.749112	1.19508	0.462793	0.00803528	0	0.608125	3.02552		0.602995	-0.239566	0.00796749	0	0	0.033746	0.5925	0.00235855	0.606396	0.852923	0.372274
5D\10	Deimos	concentrates	0.5	14.8	46.9	26.0999	0.4		10.2	98.8999	4	0.0125461	0.581869	1.23696	0.728119	0.0113019	0	0.507244	3.07804		0.494383	-0.22184	0.0110154	0	0	0.101415	0.602799	0.012228	0.493784	0.714187	0.287068
101\1	Zapolarnaya	concentrates	2.6	7	55.8	20.2561	0.4		12.0493	98.1054	4	0.0664618	0.280365	1.49927	0.575681	0.0115137	0	0.610436	3.04372		0.601667	-0.474847	0.0113483	0	0	0.0574598	0.738864	0.0655071	0.570755	0.797467	0.147854
101\1	Zapolarnaya	concentrates	0.2	21.5	41.8	19.6982	0.3		14.5197	98.0179	4	0.00476617	0.802794	1.04704	0.521906	0.00805038	0	0.685767	3.07032		0.670061	-0.285723	0.00786601	0	0	0.0916112	0.511528	0.00465701	0.672218	0.640707	0.394039
101\1	Zapolarnaya	concentrates	0	6.2	64.2	15.0562	0.3		12.8469	98.6031	4	0	0.245421	1.7048	0.422898	0.00853434	0	0.643236	3.02489		0.637944	-0.524707	0.00846412	0	0	0.032913	0.845386	0	0.643389	0.843054	0.121701
101\1	Zapolarnaya	concentrates	1.7	14.8	49.2	18.7567	0.3		13.922	98.6787	4	0.0413277	0.563741	1.25719	0.50696	0.00821238	0	0.670769	3.0482		0.660161	-0.39083	0.00808251	0	0	0.0632562	0.618657	0.0406741	0.639324	0.746439	0.289175
101\1	Zapolarnaya	concentrates	1.2	25.6	30.7	25.6784	0.3		14.0913	97.5697	4	0.0286081	0.956256	0.769293	0.680616	0.0080535	0	0.665791	3.10862		0.642528	-0.188878	0.00777211	0	0	0.139763	0.371207	0.0276085	0.63003	0.574434	0.474523
101\1	Zapolarnaya	concentrates	1.6	9.5	54.2	19.3738	0.4		13.5191	98.5929	4	0.0400586	0.372671	1.42633	0.539285	0.011277	0	0.670815	3.06044		0.657568	-0.485966	0.0110542	0	0	0.0789946	0.699082	0.0392675	0.639525	0.701137	0.190121
102-2	Zapolarnaya	concentrates	0.1	5.7	62.865	14.4999	0.3		13.6	97.0649	4	0.00256204	0.228817	1.69294	0.413026	0.00865493	0	0.690565	3.03656		0.68225	-0.57777	0.00855072	0	0	0.0481615	0.836277	0.0025312	0.686382	0.763945	0.113318
102-2	Zapolarnaya	concentrates	0.1	5	64.1332	16.7	0.4		12.8	99.1332	4	0.00254044	0.199024	1.71253	0.471686	0.0114426	0	0.644464	3.04168		0.635632	-0.548769	0.0112858	0	0	0.0548167	0.844529	0.00250563	0.641262	0.764342	0.0983948
102-2	Zapolarnaya	concentrates	0	5.5	65.0749	14.9999	0.4		12.9	98.8748	4	0	0.217864	1.72924	0.421611	0.0113871	0	0.646346	3.02645		0.640698	-0.544005	0.0112876	0	0	0.0349561	0.857064	0	0.648012	0.832717	0.10798
102-2	Zapolarnaya	concentrates	0	4.6	64.7574	16.6999	0.4		12.7	99.1573	4	0	0.183515	1.7331	0.472746	0.0114684	0	0.640871	3.04169		0.632086	-0.552897	0.0113112	0	0	0.0548312	0.854669	0	0.639317	0.764807	0.0904997
102-2	Zapolarnaya	concentrates	0	7.3	63.4844	14	0.4		13.4	98.5844	4	0	0.286266	1.67007	0.38956	0.0112729	0	0.664669	3.02183		0.659866	-0.528959	0.0111915	0	0	0.0289014	0.829	0	0.667335	0.85054	0.142099
102-2	Zapolarnaya	concentrates	1.8	5.5	57.6269	20.9999	0.4		12.3	98.6268	4	0.0462845	0.221591	1.55752	0.600353	0.0115819	0	0.626827	3.06416		0.613702	-0.516566	0.0113394	0	0	0.0837542	0.762455	0.0453154	0.593536	0.715016	0.113625
102-2	Zapolarnaya	concentrates	1.6	5.6	58.9088	19.4999	0.4		13.2	99.2087	4	0.0406267	0.222795	1.57224	0.550493	0.0114369	0	0.664271	3.06186		0.650851	-0.552909	0.0112058	0	0	0.0808108	0.770236	0.039806	0.632754	0.700352	0.113672
102-2	Zapolarnaya	concentrates	0.9	6.9	60.4719	16.4	0.4		13.2	98.2719	4	0.0227553	0.273347	1.60708	0.461009	0.0113882	0	0.661444	3.03703		0.653379	-0.529621	0.0112494	0	0	0.0487694	0.793745	0.0224778	0.646124	0.785812	0.138112
102-2	Zapolarnaya	concentrates	0	4.5	64.9466	16.5	0.3		12.8	99.0466	4	0	0.17961	1.73897	0.467305	0.00860533	0	0.646219	3.04071		0.637567	-0.557455	0.00849012	0	0	0.0535528	0.857845	0	0.643027	0.767691	0.0886024
102-2	Zapolarnaya	concentrates	2	7.1	56.1471	19.1999	0.3		13.6	98.347	4	0.0506812	0.281904	1.49551	0.540931	0.0085604	0	0.683023	3.06061		0.669496	-0.539727	0.00839087	0	0	0.079214	0.732948	0.0496776	0.642951	0.701202	0.145383
102-2	Zapolarnaya	concentrates	0	11.4	54.9613	18.8999	0.4		13.6	99.2612	4	0	0.441406	1.42761	0.51927	0.0111307	0	0.666078	3.06549		0.651847	-0.446753	0.0108929	0	0	0.085458	0.698554	0	0.659026	0.663668	0.215988
102-2	Zapolarnaya	concentrates	0.5	22	42.7976	16.9999	0.3		16	98.5975	4	0.0116869	0.80571	1.05147	0.441778	0.007896	0	0.741189	3.05973		0.726721	-0.339472	0.00774187	0	0	0.0780793	0.51547	0.0114588	0.72403	0.639485	0.39957
102-2	Zapolarnaya	concentrates	0	5	64.4811	16.3999	0.4		12.6	98.881	4	0	0.199507	1.726	0.464334	0.0114704	0	0.635935	3.03725		0.628136	-0.540935	0.0113297	0	0	0.0490529	0.852417	0	0.635334	0.786094	0.0985304
102-2	Zapolarnaya	concentrates	0.1	8.9	58.9872	16.4999	0.3		13.6	98.3871	4	0.00250382	0.349156	1.55241	0.459316	0.00845824	0	0.674871	3.04671		0.664524	-0.500951	0.00832855	0	0	0.0613303	0.764303	0.00246543	0.668443	0.728791	0.172326
102-2	Zapolarnaya	concentrates	0.2	11.5	55.5513	17.5	0.3		13.4	98.4513	4	0.00495771	0.446658	1.44741	0.482297	0.0083739	0	0.658317	3.04801		0.647947	-0.436378	0.008242	0	0	0.063005	0.712304	0.00487962	0.650133	0.734548	0.220889
102-2	Zapolarnaya	concentrates	2.1	6	58.9558	20.1999	0.3		13.3	100.856	4	0.0523659	0.234426	1.54526	0.560023	0.00842376	0	0.657294	3.05779		0.644872	-0.538138	0.00826456	0	0	0.0755991	0.758027	0.0513762	0.618219	0.724813	0.121226
102-2	Zapolarnaya	concentrates	2.6	6.4	54.3508	20.4999	0.3		12.8	96.9507	4	0.0673436	0.259734	1.4797	0.590338	0.00874984	0	0.657071	3.06294		0.643569	-0.52494	0.00857004	0	0	0.0821932	0.724648	0.0659598	0.608639	0.715696	0.136181
102-2	Zapolarnaya	concentrates	1.5	6.6	58.2061	18.6	0.4		13.1	98.4061	4	0.0381254	0.262841	1.55502	0.525609	0.0114482	0	0.659893	3.05294		0.64845	-0.530558	0.0112497	0	0	0.0693648	0.764029	0.0374643	0.631885	0.731401	0.134168
102-2	Zapolarnaya	concentrates	0	4.1	65.3337	16.5	0.4		12.7	99.0337	4	0	0.164078	1.75398	0.468545	0.0115042	0	0.642871	3.04097		0.634209	-0.564624	0.0113492	0	0	0.0538949	0.865171	0	0.641489	0.766806	0.0809337
102-2	Zapolarnaya	concentrates	0	4.4	64.0832	17	0.4		12.4	98.2832	4	0	0.177564	1.73486	0.4868	0.0116009	0	0.63296	3.04379		0.623854	-0.547784	0.011434	0	0	0.0575426	0.854953	0	0.63107	0.760137	0.0875047
102-2	Zapolarnaya	concentrates	0.1	6.2	63.9989	14.8999	0.4		13.6	99.1988	4	0.00250555	0.2434	1.68547	0.415063	0.0112854	0	0.675337	3.03306		0.667976	-0.558765	0.0111624	0	0	0.0435995	0.833549	0.00247824	0.673828	0.787598	0.120673
102-2	Zapolarnaya	concentrates	0.2	6.3	63.9862	14.8	0.3		13.4	98.9862	4	0.00501754	0.247644	1.6873	0.412809	0.00847497	0	0.666262	3.02751		0.660208	-0.545909	0.00839796	0	0	0.0363459	0.835985	0.00497195	0.662478	0.822295	0.12331
102-2	Zapolarnaya	concentrates	0	4.2	64.2792	17.5999	0.3		12.2	98.5791	4	0	0.169496	1.7402	0.50399	0.00870083	0	0.622763	3.04515		0.613529	-0.538609	0.00857182	0	0	0.0593088	0.8572	0	0.618834	0.7611	0.0834914
102-2	Zapolarnaya	concentrates	0.9	19.5	38.7894	25.3998	0.3		13.8	98.6892	4	0.0218559	0.741972	0.990114	0.685777	0.00820358	0	0.664179	3.1121		0.640254	-0.29054	0.00790808	0	0	0.144084	0.477224	0.0210687	0.631937	0.564091	0.365319
102-2	Zapolarnaya	concentrates	4.9	14.8	40.7543	24.6999	0.3		13.6	99.0542	4	0.11981	0.567003	1.04741	0.671457	0.00825989	0	0.659045	3.07298		0.643393	-0.374688	0.00806372	0	0	0.095001	0.511266	0.116965	0.580208	0.710146	0.313428
102-2	Zapolarnaya	concentrates	2.9	7	52.7083	21.6	0.4		12	96.6083	4	0.0755196	0.285618	1.44273	0.625375	0.0117294	0	0.61933	3.0603		0.607125	-0.478629	0.0114983	0	0	0.0788222	0.707151	0.0740314	0.571394	0.742853	0.151188
102-2	Zapolarnaya	concentrates	0.1	29	34.4911	18.1999	0.3		16.2	98.291	4	0.00228028	1.03612	0.826684	0.461406	0.00770308	0	0.732119	3.06632		0.716285	-0.216964	0.00753648	0	0	0.0865087	0.404403	0.00223096	0.720106	0.616732	0.507991
102-2	Zapolarnaya	concentrates	0.1	14	49.8134	21.2998	0.3		12.9	98.4132	4	0.00248096	0.54422	1.29901	0.587521	0.00838103	0	0.634292	3.0759		0.61864	-0.361419	0.00817421	0	0	0.0987085	0.633476	0.00241974	0.62222	0.655481	0.266039
102-2	Zapolarnaya	concentrates	1.4	5.7	57.8465	19.4999	0.4		13	97.8464	4	0.0360603	0.23004	1.56612	0.558418	0.0116016	0	0.663627	3.06586		0.64937	-0.548174	0.0113523	0	0	0.0859294	0.766236	0.0352857	0.634192	0.685483	0.116665
102-2	Zapolarnaya	concentrates	0	41.6	22.1941	15.2999	0.2		18.8	98.094	4	0	1.39231	0.498312	0.363356	0.00481065	0	0.795893	3.05469		0.781645	-0.102675	0.00472453	0	0	0.0716103	0.244695	0	0.785355	0.598655	0.683694
102-2	Zapolarnaya	concentrates	0.1	20.2	42.827	19.4998	0.3		15.4	98.3268	4	0.00238468	0.754757	1.07348	0.516996	0.00805576	0	0.727829	3.0835		0.70812	-0.348798	0.00783761	0	0	0.108317	0.522204	0.0023201	0.712049	0.569314	0.368013
102-2	Zapolarnaya	concentrates	3.9	12	39.4244	31.5998	0.3		11.6	98.8242	4	0.0996027	0.480191	1.05832	0.897259	0.00862747	0	0.587142	3.13114		0.562551	-0.340778	0.00826612	0	0	0.167532	0.506997	0.095431	0.517448	0.610244	0.254308
102-2	Zapolarnaya	concentrates	3.9	8.3	45.6004	29.4998	0.3		11.1	98.7002	4	0.101077	0.337048	1.24223	0.850027	0.00875516	0	0.57015	3.10929		0.550111	-0.395957	0.00844744	0	0	0.140592	0.599283	0.0975243	0.505117	0.657156	0.180172
102-2	Zapolarnaya	concentrates	0.1	15.1	48.7491	20.8999	0.3		13.7	98.849	4	0.00244984	0.579618	1.25531	0.569257	0.0082759	0	0.665178	3.08009		0.647883	-0.37367	0.00806071	0	0	0.104006	0.611334	0.00238614	0.65158	0.624834	0.282948
102-2	Zapolarnaya	concentrates	0	15.5	48.606	21.4999	0.3		13.4	99.3059	4	0	0.59284	1.24714	0.583503	0.00824625	0	0.648281	3.08001		0.631441	-0.350753	0.00803204	0	0	0.103909	0.607371	0	0.636554	0.634345	0.28872
102-2	Zapolarnaya	concentrates	0.1	11.3	55.714	19.1999	0.4		12	98.7139	4	0.0024972	0.442138	1.46239	0.533065	0.0112478	0	0.593901	3.04524		0.585078	-0.378374	0.0110807	0	0	0.0594222	0.720333	0.0024601	0.590166	0.773693	0.218322
102-2	Zapolarnaya	concentrates	2.9	5.8	54.8722	23.1	0.4		12.1	99.1722	4	0.0743304	0.232929	1.47831	0.658274	0.0115447	0	0.614658	3.07005		0.600633	-0.498107	0.0112813	0	0	0.091267	0.722292	0.0726345	0.565913	0.716233	0.122721
102-2	Zapolarnaya	concentrates	2.6	5.5	57.524	19.2	0.4		13	98.224	4	0.0665032	0.220424	1.54655	0.546004	0.0115209	0	0.65901	3.05001		0.648204	-0.551131	0.011332	0	0	0.0655872	0.760595	0.0654128	0.614947	0.755751	0.115992
102-2	Zapolarnaya	concentrates	1.4	23.8	35.427	21.7999	0.3		15.7	98.4269	4	0.0328864	0.875975	0.874718	0.569337	0.00793534	0	0.730915	3.09177		0.709221	-0.291933	0.00769981	0	0	0.118725	0.424378	0.0319103	0.692456	0.57018	0.438996
102-2	Zapolarnaya	concentrates	4.6	16.9	38.6747	24.4999	0.3		14	98.9746	4	0.111367	0.641079	0.984173	0.659462	0.00817854	0	0.671748	3.07601		0.655149	-0.350506	0.00797645	0	0	0.0988384	0.479927	0.108615	0.595244	0.692651	0.350712
107\4	Zapolarnaya	concentrates	0.7	5.4	62	17.6816	0.4		11.1629	97.3445	4	0.0181728	0.219656	1.69185	0.510354	0.0116934	0	0.574354	3.02608		0.569405	-0.472116	0.0115926	0	0	0.0344689	0.838633	0.0180162	0.565771	0.863748	0.110879
107\4	Zapolarnaya	concentrates	3.4	19.5	28.9	32.5071	0.2		12.7123	97.2194	4	0.0851295	0.765001	0.760579	0.904913	0.0056388	0	0.630819	3.15208		0.600383	-0.241704	0.00536675	0	0	0.19299	0.361942	0.0810222	0.558156	0.551838	0.396142
107\8	Zapolarnaya	concentrates	0	5.7	62.4	17.7602	0.4		12.2614	98.5216	4	0	0.228595	1.67879	0.505406	0.0115287	0	0.621992	3.04631		0.612537	-0.51133	0.0113535	0	0	0.0608067	0.826633	0	0.619571	0.755661	0.11256
107\8	Zapolarnaya	concentrates	2	6.2	58.1	18.1223	0.3		13.3906	98.1129	4	0.0508905	0.247187	1.55392	0.51268	0.00859575	0	0.675284	3.04856		0.664528	-0.551362	0.00845884	0	0	0.0637106	0.764585	0.05008	0.637975	0.747438	0.128037
107\8	Zapolarnaya	concentrates	0.5	12.6	52.5	17.6745	0.3		13.4028	96.9773	4	0.0125048	0.493745	1.3801	0.491451	0.00844856	0	0.664325	3.05057		0.653311	-0.41884	0.0083085	0	0	0.0663131	0.67861	0.0122975	0.650716	0.725584	0.245802
107\8	Zapolarnaya	concentrates	0.3	12.3	46.3	28.4609	0.3		10.7355	98.3964	4	0.00770393	0.494906	1.24973	0.81258	0.00867497	0	0.546377	3.11998		0.525367	-0.295771	0.00834138	0	0	0.153817	0.600838	0.00740768	0.525858	0.606271	0.239713
110\1	Zapolarnaya	concentrates	0	4.5	64.5	17.6785	0.4		12.0329	99.1114	4	0	0.180531	1.73587	0.503252	0.0115326	0	0.610608	3.0418		0.602218	-0.524567	0.0113742	0	0	0.0549642	0.856011	0	0.609146	0.778521	0.0890252
110\1	Zapolarnaya	concentrates	0.1	6	65.1	15.25	0.4		12.801	99.651	4	0.00250442	0.235443	1.7137	0.424623	0.0112804	0	0.635376	3.02293		0.630558	-0.524924	0.0111948	0	0	0.0303349	0.850351	0.00248543	0.636098	0.856029	0.11712
110\2	Zapolarnaya	concentrates	0.1	6.2	60.8	16.9953	0.4		12.6	97.0953	4	0.00258148	0.250776	1.64975	0.487779	0.0116275	0	0.644642	3.04716		0.634666	-0.522666	0.0114475	0	0	0.0619013	0.812109	0.00254153	0.640369	0.742202	0.123762
110\2	Zapolarnaya	concentrates	0.1	5.3	63	15.4734	0.4		12.7	96.9734	4	0.00258382	0.214568	1.71099	0.444503	0.011638	0	0.650348	3.03463		0.642925	-0.548371	0.0115052	0	0	0.0456528	0.845733	0.00255433	0.648732	0.792218	0.106331
110\2	Zapolarnaya	concentrates	0.1	16.3	51.4	14.4502	0.3		15.2	97.7502	4	0.00240851	0.615124	1.30124	0.386945	0.00813627	0	0.725557	3.03941		0.716149	-0.420606	0.00803078	0	0	0.0518653	0.642184	0.00237728	0.720221	0.728403	0.304297
110\2	Zapolarnaya	concentrates	0	5.3	62.3	16.7841	0.3		12.5	97.1841	4	0	0.215062	1.69588	0.483265	0.00874858	0	0.641579	3.04453		0.632195	-0.534857	0.00862062	0	0	0.058506	0.835536	0	0.637692	0.754278	0.105958
110\2	Zapolarnaya	concentrates	0	6.4	62.5	15.101	0.4		12.9	97.301	4	0	0.256484	1.68027	0.429426	0.0115205	0	0.653918	3.03162		0.647097	-0.531593	0.0114003	0	0	0.0417221	0.831373	0	0.654559	0.803636	0.126904
110\2	Zapolarnaya	concentrates	0.2	10.3	55.2	17.9162	0.3		13.2	97.1162	4	0.00506146	0.408422	1.46835	0.504103	0.00854915	0	0.662063	3.05655		0.649813	-0.457771	0.00839098	0	0	0.0740062	0.720593	0.00496782	0.652045	0.70085	0.201434
110\2	Zapolarnaya	concentrates	0	27.4	36	16.4545	0.2		16.3	96.3545	4	0	0.998519	0.880091	0.425491	0.005238	0	0.751357	3.0607		0.736457	-0.252232	0.00513412	0	0	0.0793222	0.431319	0	0.740257	0.619606	0.489359
110\2	Zapolarnaya	concentrates	0.2	37.4	25.3	15.3458	0.2		18.7	97.1458	4	0.00438266	1.28412	0.582739	0.373873	0.00493508	0	0.812136	3.06219		0.795643	-0.171457	0.00483485	0	0	0.0812325	0.285452	0.00429366	0.796074	0.556447	0.631734
110\2	Zapolarnaya	concentrates	0	18.5	46.6	16.272	0.3		15.4	97.072	4	0	0.698885	1.18097	0.436189	0.00814488	0	0.735881	3.06007		0.721435	-0.386838	0.00798499	0	0	0.0785233	0.578894	0	0.727242	0.632748	0.342583
110\2	Zapolarnaya	concentrates	0	5.5	61.9	17.4308	0.4		12	97.2308	4	0	0.22364	1.68849	0.502926	0.011689	0	0.617194	3.04394		0.608286	-0.5096	0.0115203	0	0	0.0577365	0.832057	0	0.615375	0.767035	0.110206
110\2	Zapolarnaya	concentrates	1.3	20.6	37.1	25.9936	0.3		12.2	97.4936	4	0.0319163	0.792434	0.957391	0.709516	0.00829367	0	0.59362	3.09317		0.57574	-0.199501	0.00804385	0	0	0.120486	0.464276	0.030955	0.562844	0.649822	0.396558
110\2	Zapolarnaya	concentrates	0	5.8	63.2	16.0915	0.4		11.8	97.2915	4	0	0.234516	1.71428	0.46168	0.0116234	0	0.603504	3.0256		0.598397	-0.493656	0.0115251	0	0	0.0338478	0.849886	0	0.605374	0.85212	0.116266
110\2	Zapolarnaya	concentrates	0.1	33.2	25.8	21.6952	0.2		15.5	96.4952	4	0.00229922	1.19604	0.623514	0.55459	0.00517806	0	0.706304	3.08792		0.686193	-0.110232	0.00503062	0	0	0.113894	0.30288	0.00223376	0.688118	0.577228	0.582292
110\8	Zapolarnaya	concentrates	0	5.1	65.9	16.0874	0.4		12.2043	99.6917	4	0	0.201776	1.74905	0.451632	0.0113733	0	0.610751	3.02459		0.605787	-0.517	0.0112809	0	0	0.0325142	0.867418	0	0.612698	0.854835	0.100068
110\8	Zapolarnaya	concentrates	0.6	4.8	62.3	19.1372	0.4		11.8881	99.1253	4	0.0153851	0.192849	1.67912	0.545575	0.0115496	0	0.604145	3.04863		0.594508	-0.510987	0.0113653	0	0	0.0638034	0.826171	0.0151397	0.592273	0.762315	0.096345
110\8	Zapolarnaya	concentrates	2.3	4.6	61.1	18.0765	0.4		13.007	99.4835	4	0.0582017	0.182386	1.62515	0.508566	0.0113979	0	0.652325	3.03803		0.644159	-0.565363	0.0112552	0	0	0.0500706	0.802405	0.0574731	0.615703	0.800595	0.0955426
110\8	Zapolarnaya	concentrates	0.2	14.2	53.9	17.3695	0.3		13.0631	99.0326	4	0.00486931	0.541691	1.37934	0.470166	0.00822459	0	0.630322	3.03461		0.623133	-0.363507	0.00813078	0	0	0.0456265	0.681803	0.00481377	0.625206	0.803674	0.269051
110\8	Zapolarnaya	concentrates	1	10.7	53.8	19.6982	0.3		13.5966	99.0948	4	0.0248205	0.416122	1.40358	0.543579	0.0083847	0	0.668837	3.06533		0.654583	-0.459162	0.00820601	0	0	0.0852459	0.686836	0.0242915	0.64422	0.679523	0.208696
110\8	Zapolarnaya	concentrates	0.1	26	41.7	13.6516	0.3		16.6464	98.398	4	0.00227842	0.928181	0.998653	0.345814	0.0076968	0	0.75168	3.0343		0.743182	-0.291947	0.00760979	0	0	0.0452217	0.493682	0.00225266	0.747184	0.735472	0.45988
115-1	Zapolarnaya	concentrates	2.2	7.3	56.3	19.5788	0.4		13.2508	99.0296	4	0.0554148	0.288106	1.49058	0.548298	0.0113454	0	0.661491	3.05524		0.649531	-0.519223	0.0111402	0	0	0.0723214	0.731817	0.0544129	0.62259	0.731339	0.149588
115-1	Zapolarnaya	concentrates	0.3	30.3	27.6	23.9097	0.3		14.892	97.3017	4	0.00698634	1.1056	0.67559	0.619054	0.00786694	0	0.687323	3.10242		0.664633	-0.13769	0.00760723	0	0	0.132051	0.326643	0.00675571	0.665199	0.558814	0.538186
115-1	Zapolarnaya	concentrates	0.1	13.4	50.1	22.6113	0.3		10.9762	97.4875	4	0.00253301	0.531825	1.33389	0.63678	0.00855686	0	0.551022	3.06461		0.539405	-0.287475	0.00837646	0	0	0.0843286	0.652885	0.00247961	0.542605	0.729436	0.260953
115-1	Zapolarnaya	concentrates	0.1	9.6	57.6	21.066	0.4		9.6971	98.4631	4	0.00255317	0.38404	1.54578	0.597983	0.0114999	0	0.490682	3.03254		0.485418	-0.306834	0.0113765	0	0	0.0429175	0.764597	0.00252577	0.489752	0.854902	0.190441
115-1	Zapolarnaya	concentrates	0.2	11.6	54.6	22.0493	0.4		10.3428	99.1921	4	0.00502476	0.456635	1.44186	0.615895	0.0113162	0	0.514995	3.04573		0.507263	-0.293519	0.0111463	0	0	0.0600538	0.710107	0.00494932	0.510426	0.802014	0.226008
115-1	Zapolarnaya	concentrates	0.3	18.2	42.3	23.5303	0.3		12.2094	96.8397	4	0.00746437	0.709528	1.10626	0.650916	0.00840521	0	0.602067	3.08464		0.585547	-0.248692	0.00817458	0	0	0.109759	0.537953	0.00725955	0.586083	0.653242	0.347552
115-1	Zapolarnaya	concentrates	0.4	4.3	63.1	19.0974	0.4		11.4067	98.7041	4	0.0103438	0.174226	1.71511	0.549059	0.0116475	0	0.584598	3.04499		0.575961	-0.50161	0.0114754	0	0	0.0590961	0.844887	0.0101909	0.576702	0.781509	0.0867096
115-1	Zapolarnaya	concentrates	0	38.7	23	17.9335	0.2		15.7682	95.6017	4	0	1.3578	0.541342	0.446468	0.00504294	0	0.699777	3.05043		0.688208	-0.0254917	0.00495957	0	0	0.0661276	0.266196	0	0.691639	0.698795	0.667676
115-1	Zapolarnaya	concentrates	0.6	12.5	46.9	26.2925	0.4		10.8967	97.5892	4	0.0154042	0.502833	1.26563	0.75049	0.0115639	0	0.554449	3.10037		0.5365	-0.304412	0.0111895	0	0	0.129489	0.612328	0.0149055	0.534514	0.643375	0.246958
115-1	Zapolarnaya	concentrates	2	12	50.3	19.1964	0.3		13.258	97.0544	4	0.0501677	0.47163	1.3262	0.535352	0.00847366	0	0.6591	3.05092		0.6481	-0.424553	0.00833224	0	0	0.0667595	0.652031	0.0493304	0.622575	0.746363	0.243912
115-1	Zapolarnaya	concentrates	0.1	35.2	24	22.344	0.2		14.9501	96.7941	4	0.00227965	1.25729	0.575074	0.566311	0.00513397	0	0.675446	3.08154		0.657574	-0.0505596	0.00499812	0	0	0.105839	0.279929	0.00221933	0.659406	0.616055	0.613374
115-1	Zapolarnaya	concentrates	0.4	13.3	39.3	33.4721	0.4		10.3744	97.2465	4	0.0105093	0.547508	1.0853	0.977735	0.0118339	0	0.5402	3.17309		0.510733	-0.2631	0.0111884	0	0	0.218193	0.51305	0.009936	0.511373	0.527925	0.261418
115-1	Zapolarnaya	concentrates	0	18.8	48.1	15.405	0.3		14.5656	97.1706	4	0	0.708287	1.21567	0.411825	0.00812273	0	0.694117	3.03802		0.68543	-0.34374	0.00802107	0	0	0.050061	0.600228	0	0.690972	0.753801	0.349711
115-1	Zapolarnaya	concentrates	0.2	30.5	25.6	25.8252	0.2		14.0372	96.3624	4	0.00472804	1.12974	0.636116	0.678768	0.00532398	0	0.657674	3.11235		0.633934	-0.0945876	0.0051318	0	0	0.144387	0.306577	0.00455737	0.634298	0.558628	0.546971
115-1	Zapolarnaya	concentrates	4.3	7.2	49.3	24.7155	0.3		12.2206	98.0361	4	0.110762	0.290591	1.3348	0.707814	0.00870164	0	0.623872	3.07654		0.608351	-0.475155	0.00848515	0	0	0.0995167	0.650796	0.108007	0.553287	0.711631	0.158836
115-1	Zapolarnaya	concentrates	3	5.6	52	26.6361	0.4		10.1592	97.7953	4	0.0792883	0.231901	1.44456	0.782682	0.0119043	0	0.532141	3.08248		0.517902	-0.41664	0.0115858	0	0	0.10703	0.702955	0.0771667	0.486028	0.718985	0.122284
115-1	Zapolarnaya	concentrates	5.7	11.4	42.5	27.7542	0.6		10.811	98.7652	4	0.144158	0.451747	1.12979	0.780402	0.0170872	0	0.541887	3.06507		0.530383	-0.326029	0.0167244	0	0	0.0849218	0.552903	0.141097	0.471714	0.777643	0.257396
115-1	Zapolarnaya	concentrates	0.1	28.4	41.1	12.5409	0.3		14.3514	96.7923	4	0.00229263	1.02019	0.990426	0.319661	0.00774483	0	0.652091	2.9924		0.653747	-0.150123	0.00776449	0	0	-0.0101571	0.49647	0.00229846	0.65734	1.06339	0.512566
115-1	Zapolarnaya	concentrates	2.3	8.5	42.5	35.7855	0.5		8.4283	98.0138	4	0.0618952	0.358405	1.20216	1.07069	0.0151515	0	0.449519	3.15782		0.427053	-0.271201	0.0143942	0	0	0.199911	0.571041	0.0588018	0.408895	0.606929	0.180883
115-1	Zapolarnaya	concentrates	0	49.9	13.5	12.8531	0.2		18.055	94.5081	4	0	1.65594	0.300536	0.302657	0.00476982	0	0.757867	3.02176		0.752409	0.0648599	0.00473547	0	0	0.0288105	0.149185	0	0.755989	0.808235	0.822004
115-1	Zapolarnaya	concentrates	9.7	5.4	42	30.4	0.5		11.0976	99.0976	4	0.250862	0.218818	1.14171	0.874102	0.0145609	0	0.568815	3.06887		0.556049	-0.46333	0.0142341	0	0	0.0897686	0.558046	0.245232	0.451706	0.789889	0.141704
115-1	Zapolarnaya	concentrates	3.4	5.3	52.6	26.6546	0.4		9.7532	98.1078	4	0.0897079	0.219106	1.45876	0.781897	0.0118841	0	0.510009	3.07136		0.498159	-0.40276	0.011608	0	0	0.0929371	0.712432	0.0876236	0.462967	0.756623	0.117284
115-1	Zapolarnaya	concentrates	3.9	1.4	42.6	43.8017	0.5		5.9354	98.1371	4	0.112004	0.0629974	1.28595	1.39857	0.0161694	0	0.33783	3.21352		0.315382	-0.301072	0.015095	0	0	0.265781	0.600252	0.104562	0.289483	0.592875	0.0328395
115-1	Zapolarnaya	concentrates	0.6	8.3	54.3	24.4738	0.5		9.1994	97.3732	4	0.0157558	0.341502	1.49877	0.714526	0.0147848	0	0.478771	3.06411		0.468754	-0.316051	0.0144755	0	0	0.0836898	0.733705	0.0154262	0.468309	0.760742	0.169798
115-1	Zapolarnaya	concentrates	0	4.5	65.1494	15.7999	0.4		12.5	98.3493	4	0	0.180692	1.75491	0.450174	0.0115429	0	0.634876	3.0322		0.628135	-0.550168	0.0114203	0	0	0.0424743	0.868139	0	0.635391	0.809273	0.0893866
115-1	Zapolarnaya	concentrates	2.9	5.6	54.9408	20.7999	0.4		11.8	96.4407	4	0.0760425	0.230077	1.51425	0.606382	0.0118107	0	0.613225	3.05179		0.602818	-0.501342	0.0116102	0	0	0.0678837	0.744278	0.074752	0.567015	0.772237	0.122222
115-1	Zapolarnaya	concentrates	1.9	5.2	57.3712	20.9999	0.4		12.5	98.3711	4	0.0490172	0.210196	1.55573	0.602336	0.0116201	0	0.639122	3.06802		0.624952	-0.533547	0.0113625	0	0	0.088683	0.760619	0.0479304	0.602905	0.69886	0.107942
115-1	Zapolarnaya	concentrates	1	22.1	32.7516	27.4998	0.3		13.8	97.4514	4	0.0244139	0.845388	0.840457	0.746437	0.00824735	0	0.667722	3.13266		0.639445	-0.24255	0.00789808	0	0	0.169394	0.402432	0.02338	0.629696	0.526054	0.414484
115-1	Zapolarnaya	concentrates	2.3	14.1	43.2935	27.7998	0.3		13.3	101.093	4	0.0562339	0.540152	1.1126	0.75568	0.00825938	0	0.644468	3.11739		0.620199	-0.368242	0.00794835	0	0	0.150627	0.535351	0.0541163	0.592829	0.585747	0.274775
115-1	Zapolarnaya	concentrates	0.1	24	43.6012	15.7	0.3		15.6	99.3012	4	0.00229805	0.864164	1.05318	0.401129	0.00776311	0	0.710497	3.03903		0.701372	-0.282503	0.0076634	0	0	0.0513722	0.519827	0.00226853	0.705176	0.74053	0.427502
115-1	Zapolarnaya	concentrates	3.1	5.7	52.3526	25.2998	0.4		11.6	98.4524	4	0.0806729	0.232416	1.43202	0.731998	0.0117215	0	0.598278	3.08711		0.581396	-0.479858	0.0113907	0	0	0.112867	0.695807	0.0783966	0.544886	0.682665	0.122536
115-1	Zapolarnaya	concentrates	2.4	5.6	59.1508	18.1999	0.4		13.2	98.9507	4	0.0607334	0.22204	1.57334	0.512051	0.0113981	0	0.662017	3.04158		0.652968	-0.554708	0.0112423	0	0	0.0546789	0.775916	0.0599032	0.622668	0.783472	0.11648
115-1	Zapolarnaya	concentrates	2.9	5.1	56.103	22.4999	0.4		12	99.0029	4	0.0746029	0.205567	1.51701	0.643525	0.0115871	0	0.611812	3.06411		0.599012	-0.509723	0.0113446	0	0	0.0836876	0.742637	0.0730421	0.564202	0.734351	0.108563
115-1	Zapolarnaya	concentrates	3.1	5.4	53.9098	24.6999	0.3		11.4	98.8097	4	0.0803727	0.219365	1.46913	0.711981	0.00875838	0	0.585775	3.07538		0.571417	-0.472967	0.0085437	0	0	0.0980438	0.71656	0.0784027	0.534105	0.717668	0.116096
115-1	Zapolarnaya	concentrates	5.9	9.5	43.8687	25.5998	0.4		13.9	99.1685	4	0.147727	0.372699	1.15454	0.712644	0.0112778	0	0.689767	3.08865		0.669969	-0.499922	0.0109541	0	0	0.114812	0.5607	0.143487	0.591567	0.668263	0.211323
115-1	Zapolarnaya	concentrates	10.4	5.5	33.125	35.7998	0.5		13.1	98.4248	4	0.273179	0.226362	0.914566	1.04549	0.014789	0	0.681969	3.15636		0.648186	-0.554668	0.0140564	0	0	0.198149	0.434631	0.259647	0.520385	0.601191	0.145301
115-1	Zapolarnaya	concentrates	0	22.5	38.8158	23.2998	0.3		14.6	99.5156	4	0	0.833142	0.964193	0.612194	0.00798338	0	0.68382	3.10133		0.661477	-0.26624	0.00772254	0	0	0.130696	0.466345	0	0.666625	0.558603	0.40296
115-1	Zapolarnaya	concentrates	0	22.5	38.4875	22.8999	0.3		14.7	98.8874	4	0	0.83692	0.960374	0.604414	0.00801959	0	0.691626	3.10135		0.669024	-0.271997	0.00775751	0	0	0.130721	0.464494	0	0.674254	0.55283	0.404784
115-1	Zapolarnaya	concentrates	4.9	12.5	42.6947	25.0999	0.3		13.9	99.3946	4	0.120775	0.482744	1.10611	0.687827	0.00832641	0	0.679008	3.0848		0.660343	-0.433703	0.00809753	0	0	0.109953	0.537855	0.117455	0.595248	0.671253	0.265978
115-1	Zapolarnaya	concentrates	0.8	16.5	50.7983	17.6	0.3		12.7	98.6983	4	0.0193299	0.62467	1.29014	0.472802	0.00816239	0	0.608168	3.02327		0.603487	-0.301656	0.00809957	0	0	0.0307845	0.640103	0.0191812	0.596873	0.868768	0.315992
115-1	Zapolarnaya	concentrates	0.7	9.2	55.6954	21.0999	0.3		11.9	98.8953	4	0.0176973	0.364438	1.48004	0.593085	0.00854056	0	0.59626	3.06006		0.584556	-0.414287	0.00837293	0	0	0.0785116	0.725496	0.01735	0.579356	0.729943	0.181797
115-1	Zapolarnaya	concentrates	3	16.5	34.6293	30.9998	0.3		13	98.4291	4	0.0750254	0.646543	0.910282	0.861932	0.0084482	0	0.644332	3.14656		0.61432	-0.314161	0.00805469	0	0	0.186314	0.433941	0.0715308	0.577653	0.546562	0.331959
115-1	Zapolarnaya	concentrates	9.4	5.3	37.0724	32.4998	0.5		13.3	98.0722	4	0.246134	0.217443	1.02033	0.946132	0.0147424	0	0.6902	3.13498		0.660482	-0.57055	0.0141077	0	0	0.172224	0.488199	0.235537	0.540746	0.61956	0.136096
115-1	Zapolarnaya	concentrates	0.09	29.93	32.26	19.5199	0.18		16.47	98.4499	4	0.00204623	1.06622	0.770943	0.49342	0.0046083	0	0.742139	3.07937		0.72301	-0.208132	0.00448952	0	0	0.103104	0.375536	0.00199349	0.724819	0.571028	0.520405
115-1	Zapolarnaya	concentrates	0.1581	29.1	28.6	24.6998	0.2		15.7699	98.5278	4	0.00366095	1.0558	0.696103	0.63589	0.00521492	0	0.723719	3.12039		0.695798	-0.193279	0.00501373	0	0	0.154324	0.334623	0.00351971	0.696839	0.495142	0.509325
115-1	Zapolarnaya	concentrates	0.0469	5.3	61.7	19.1999	0.4		11.991	98.6378	4	0.00120727	0.213764	1.66941	0.549488	0.0115944	0	0.61174	3.05721		0.600294	-0.506789	0.0113775	0	0	0.0748464	0.819087	0.00118468	0.606475	0.722383	0.105007
115-1	Zapolarnaya	concentrates	0.3458	32.1	24.1	26.3998	0.2		15.1284	98.274	4	0.00796353	1.15828	0.583368	0.675939	0.0051864	0	0.690482	3.12121		0.663667	-0.112006	0.00498498	0	0	0.155343	0.280356	0.00765426	0.6619	0.521792	0.56094
115-1	Zapolarnaya	concentrates	2.5908	5.3	58.3	19.3999	0.4		13.1722	99.1629	4	0.0657221	0.210659	1.5545	0.547147	0.011426	0	0.66224	3.0517		0.651021	-0.558708	0.0112324	0	0	0.0677613	0.764085	0.0646088	0.618033	0.748042	0.110697
115-1	Zapolarnaya	concentrates	0.0806	28.4	35.2	16.4999	0.2		17.5014	97.8819	4	0.00183534	1.01327	0.842497	0.417723	0.00512821	0	0.789828	3.07028		0.771748	-0.281721	0.00501083	0	0	0.0915632	0.411606	0.00179332	0.774239	0.551338	0.495927
115-1	Zapolarnaya	concentrates	0.7691	37.5	22.3	18.2998	0.2		18.6721	97.741	4	0.0168653	1.28846	0.513999	0.446155	0.00493853	0	0.811493	3.08191		0.789926	-0.167626	0.00480728	0	0	0.106307	0.250169	0.0164171	0.78086	0.510443	0.637574
115-1	Zapolarnaya	concentrates	0.1153	4.9	64.3	17.3999	0.4		11.8408	98.956	4	0.00294906	0.196371	1.72867	0.494799	0.0115205	0	0.600226	3.03453		0.593396	-0.507717	0.0113894	0	0	0.0455191	0.854497	0.0029155	0.598467	0.813892	0.0973519
115-1	Zapolarnaya	concentrates	2.1706	11.2	51.4	18.5999	0.3		14.6748	98.3453	4	0.0536596	0.433822	1.3356	0.511216	0.00835111	0	0.718983	3.06163		0.70451	-0.500148	0.008183	0	0	0.0805196	0.654356	0.0525794	0.674562	0.678517	0.22434
115-1	Zapolarnaya	concentrates	3.1671	1.5	53.5	31.8999	0.5		8.0997	98.6667	4	0.0865963	0.0642621	1.53758	0.969736	0.0153944	0	0.43892	3.11248		0.423058	-0.406926	0.0148381	0	0	0.144559	0.741004	0.0834667	0.395888	0.69068	0.0337902
115-1	Zapolarnaya	concentrates	0.6283	4.7	61.9	18.0999	0.3		12.4383	98.0665	4	0.0162131	0.19003	1.67894	0.519281	0.00871718	0	0.63612	3.0493		0.625835	-0.540933	0.00857624	0	0	0.064673	0.825897	0.015951	0.621254	0.74682	0.0949942
115-1	Zapolarnaya	concentrates	0.0112	23.8	41.6	16.7	0.3		16.1679	98.5791	4	0.000259717	0.86474	1.01396	0.430551	0.00783356	0	0.743045	3.06039		0.728383	-0.312224	0.00767899	0	0	0.0789309	0.496976	0.000254592	0.733831	0.625968	0.423946
115-1	Zapolarnaya	concentrates	0.102	29.4	28.3	24.5999	0.3		15.3331	98.035	4	0.00237213	1.0713	0.691782	0.636058	0.00785623	0	0.706719	3.11609		0.68039	-0.172259	0.00756356	0	0	0.149016	0.333005	0.00228375	0.684002	0.513307	0.516875
115-1	Zapolarnaya	concentrates	0.306	4.7	62	19.5	0.4		11.7527	98.6587	4	0.00790525	0.190247	1.68357	0.560086	0.0116362	0	0.601742	3.05519		0.590873	-0.508894	0.011426	0	0	0.072253	0.826579	0.00776245	0.593046	0.737247	0.094136
119\1	Zapolarnaya	concentrates	0.1	35.4	28.6	15.3815	0.2		16.8	96.4815	4	0.00223322	1.23868	0.671339	0.381906	0.0050294	0	0.743565	3.04276		0.733117	-0.127437	0.00495873	0	0	0.0562066	0.330953	0.00220184	0.735144	0.701457	0.611986
119\1	Zapolarnaya	concentrates	0.4	16.1	48.1	17.3664	0.3		14.6	96.8664	4	0.00981247	0.618829	1.24025	0.473648	0.00828696	0	0.709824	3.06065		0.695758	-0.400598	0.00812275	0	0	0.0792623	0.607836	0.00961803	0.694719	0.658545	0.306229
119\1	Zapolarnaya	concentrates	0	51.1	14.2	10.1786	0.1		20.4	95.9786	4	0	1.64789	0.307196	0.232915	0.0023176	0	0.832131	3.02245		0.825949	-0.0104231	0.00230038	0	0	0.029717	0.152457	0	0.827853	0.742916	0.817826
119\1	Zapolarnaya	concentrates	2	24.1	21.4	33.1467	0.2		15.2	96.0467	4	0.0495098	0.934769	0.556827	0.912278	0.00557502	0	0.745734	3.20469		0.698102	-0.265789	0.00521893	0	0	0.255491	0.26063	0.0463475	0.670524	0.401667	0.458795
119\1	Zapolarnaya	concentrates	0.1	21.4	46.6	16.5923	0.4		12.6	97.6923	4	0.00238326	0.799118	1.16735	0.439648	0.0107346	0	0.595142	3.01438		0.592303	-0.205333	0.0106834	0	0	0.0190828	0.580892	0.00237189	0.597267	0.912775	0.398598
119\1	Zapolarnaya	concentrates	0.3	11.9	53	18.5936	0.3		12.9	96.9936	4	0.00756108	0.469933	1.40405	0.521018	0.00851412	0	0.644364	3.05545		0.632672	-0.410329	0.00835962	0	0	0.0725852	0.689288	0.00742388	0.633264	0.716222	0.232428
119\1	Zapolarnaya	concentrates	1.7	20.2	29.2	30.4264	0.3		14.5	96.3264	4	0.0425487	0.792163	0.768184	0.846669	0.00845501	0	0.719257	3.17728		0.679126	-0.313127	0.00798326	0	0	0.223182	0.362662	0.0401747	0.657946	0.441647	0.389636
119\1	Zapolarnaya	concentrates	2.2	14.6	49.3	15.8119	0.3		15	97.2119	4	0.0536295	0.557648	1.2632	0.428541	0.00823489	0	0.724688	3.03595		0.716108	-0.448723	0.00813739	0	0	0.0473593	0.624124	0.0529945	0.685365	0.776326	0.290941
119\1	Zapolarnaya	concentrates	0	8.7	58.5	15.7569	0.3		13.5	96.7569	4	0	0.346653	1.56369	0.445498	0.00859066	0	0.680397	3.04483		0.670379	-0.508069	0.00846418	0	0	0.0588915	0.770334	0	0.676102	0.731665	0.170775
119\1	Zapolarnaya	concentrates	0.1	39.7	20.9	18.5466	0.3		17.3	96.8466	4	0.0022014	1.36936	0.483606	0.453931	0.00743664	0	0.754788	3.07132		0.737261	-0.0757458	0.00726395	0	0	0.0928825	0.236188	0.00215029	0.741051	0.581035	0.67022
123\1	Zapolarnaya	concentrates	0.8	27.8	27.4	26.3495	0.2		14.9	97.4495	4	0.0189138	1.02982	0.680903	0.692609	0.00532445	0	0.698159	3.12573		0.670077	-0.18099	0.00511029	0	0	0.160892	0.326757	0.018153	0.66145	0.515932	0.503334
130\3	Zapolarnaya	concentrates	0.1	23	42	15.9129	0.2		16.1	97.3129	4	0.00234878	0.84644	1.0369	0.415545	0.00528966	0	0.749458	3.05598		0.735729	-0.325454	0.00519276	0	0	0.0732744	0.508953	0.00230575	0.737859	0.640753	0.416427
130\3	Zapolarnaya	concentrates	0.2	19.6	44.7	17.2971	0.2		15.6	97.5971	4	0.00478139	0.734187	1.12325	0.459752	0.00538406	0	0.739142	3.0665		0.723114	-0.369248	0.00526731	0	0	0.0867426	0.549447	0.0046777	0.72354	0.614291	0.360821
134А-	Zapolarnaya	concentrates	0.1204	29.2	31.6	19.8999	0.3		14.846	95.9663	4	0.00282337	1.07288	0.778885	0.518821	0.00792169	0	0.689969	3.0713		0.673952	-0.157704	0.0077378	0	0	0.0928545	0.380402	0.00275783	0.677325	0.633549	0.525435
134А-	Zapolarnaya	concentrates	0	8.6	59.8	17.5	0.4		11.6844	97.9844	4	0	0.342088	1.59573	0.493944	0.0114348	0	0.587893	3.03109		0.581863	-0.423891	0.0113175	0	0	0.0410291	0.789681	0	0.588524	0.83215	0.169289
134А-	Zapolarnaya	concentrates	0.0469	21.4	42.7	18.6999	0.3		15.0875	98.2343	4	0.00111175	0.794831	1.06392	0.492835	0.00800777	0	0.708812	3.06951		0.69276	-0.312171	0.00782642	0	0	0.0905866	0.519912	0.00108657	0.697461	0.623867	0.388838
134А-	Zapolarnaya	concentrates	3.2191	12.4	46.1	20.8999	0.3		13.4001	96.3191	4	0.0812919	0.490637	1.22365	0.586791	0.0085308	0	0.670656	3.06156		0.65717	-0.425144	0.00835926	0	0	0.0804322	0.599525	0.0796572	0.613434	0.720232	0.261192
134А-	Zapolarnaya	concentrates	2.7775	9.4	49.8	23.6999	0.3		13.0893	99.0667	4	0.0699649	0.371005	1.31856	0.663743	0.00850948	0	0.653464	3.08525		0.635408	-0.463305	0.00827435	0	0	0.110527	0.641065	0.0680317	0.599579	0.657495	0.193544
134А-	Zapolarnaya	concentrates	2.2	3.6	60.7	18.9006	0.4		11.8616	97.6622	4	0.0573154	0.146953	1.6622	0.547457	0.0117345	0	0.612451	3.03811		0.604768	-0.543801	0.0115873	0	0	0.0501745	0.820674	0.0565965	0.578721	0.814371	0.0769074
134А-	Zapolarnaya	concentrates	3.6	1.1	53.9	30.3878	0.5		8.4986	97.9864	4	0.0986582	0.0472335	1.55262	0.925883	0.0154297	0	0.461591	3.10142		0.446497	-0.438578	0.0149251	0	0	0.130799	0.750925	0.0954322	0.413229	0.707911	0.0252546
136-1	Zapolarnaya	concentrates	2.7	14.7	42	25.4955	0.3		14.1	99.2955	4	0.0663404	0.565924	1.0847	0.696473	0.00830025	0	0.686614	3.10835		0.66268	-0.397593	0.00801093	0	0	0.139429	0.523444	0.0640279	0.627528	0.585152	0.291781
136-1	Zapolarnaya	concentrates	0.1	21	41.3	19.4541	0.3		16.1495	98.3036	4	0.00237185	0.780427	1.02963	0.513009	0.00801242	0	0.759145	3.0926		0.736415	-0.365658	0.00777251	0	0	0.119768	0.499402	0.00230083	0.740467	0.518665	0.379403
136-1	Zapolarnaya	concentrates	0	46.5	15.9	15.1839	0.2		21.2026	98.9865	4	0	1.50624	0.345507	0.348998	0.00465587	0	0.868726	3.07413		0.847779	-0.117363	0.0045436	0	0	0.0964526	0.168588	0	0.851648	0.433603	0.734959
136-1	Zapolarnaya	concentrates	0.1	46.3	15.6	15.4897	0.2		21.2577	98.9474	4	0.0020705	1.50204	0.339504	0.356569	0.00466295	0	0.872309	3.07716		0.850436	-0.122793	0.00454603	0	0	0.100296	0.165496	0.00201858	0.852591	0.42297	0.733671
136-1	Zapolarnaya	concentrates	0	44	17.6	17.8951	0.1		18.5	98.0951	4	0	1.46813	0.393952	0.423688	0.00239795	0	0.780793	3.06896		0.763249	-0.048023	0.00234407	0	0	0.0898804	0.19255	0	0.765042	0.565971	0.71757
136-1	Zapolarnaya	concentrates	0.4	18.7	44	24.2527	0.3		12.3	99.9527	4	0.00965006	0.706867	1.11575	0.650514	0.0081498	0	0.588104	3.07904		0.573008	-0.236587	0.0079406	0	0	0.102681	0.543556	0.00940235	0.572171	0.675992	0.34763
136-1	Zapolarnaya	concentrates	0.5	32.2	23.7	26.3181	0.2		15.6	98.5181	4	0.0114647	1.15684	0.571198	0.670924	0.00516391	0	0.708919	3.12451		0.680668	-0.130254	0.00495812	0	0	0.159403	0.274218	0.0110078	0.676575	0.505104	0.561553
136-1	Zapolarnaya	concentrates	3	5.8	56.2	19.3564	0.4		13.6436	98.4	4	0.0763114	0.231165	1.50262	0.547418	0.0114573	0	0.687822	3.0568		0.675042	-0.572852	0.0112445	0	0	0.0743201	0.737351	0.0748935	0.634647	0.72333	0.122618
136-1	Zapolarnaya	concentrates	1.1	6.1	59.7	18.0117	0.3		13.6011	98.8128	4	0.0278513	0.241996	1.58881	0.50703	0.00855321	0	0.682504	3.05675		0.669834	-0.559477	0.00839443	0	0	0.0742562	0.779658	0.0273342	0.657384	0.701553	0.122089
136-1	Zapolarnaya	concentrates	0.5	25.6	38	17.3783	0.2		16.7	98.3783	4	0.0115125	0.923564	0.919666	0.444871	0.00518545	0	0.762073	3.06687		0.745456	-0.298815	0.00507239	0	0	0.087219	0.449806	0.0112615	0.740871	0.599151	0.456858
136-1	Zapolarnaya	concentrates	2.2	5.1	57.9	20.7832	0.4		12.6	98.9832	4	0.0563367	0.204628	1.55845	0.591709	0.0115341	0	0.639467	3.06212		0.626494	-0.537556	0.0113001	0	0	0.0811522	0.763416	0.0551937	0.600151	0.720022	0.106094
136-1	Zapolarnaya	concentrates	0.1	17.8	46.5	19.7318	0.3		14.8	99.2318	4	0.00239583	0.668193	1.17099	0.525592	0.00809344	0	0.702743	3.07801		0.684933	-0.367192	0.00788831	0	0	0.101378	0.570657	0.00233511	0.688757	0.6042	0.326391
136-1	Zapolarnaya	concentrates	1.9	5.6	50.5	30.3304	0.4		9.6	98.3304	4	0.0507409	0.234325	1.41756	0.900553	0.0120288	0	0.508107	3.12332		0.488046	-0.387063	0.0115538	0	0	0.15793	0.680796	0.0487376	0.470549	0.634844	0.118303
136-1	Zapolarnaya	concentrates	0.2	26.7	28.9	27.255	0.2		16.1817	99.4367	4	0.00466976	0.976791	0.709263	0.707518	0.00525835	0	0.748803	3.1523		0.712624	-0.25283	0.0050043	0	0	0.19326	0.337498	0.00444414	0.713024	0.425963	0.466874
136-1	Zapolarnaya	concentrates	0.1	5.4	61.6	17.7517	0.3		13.4148	98.5665	4	0.00255307	0.216014	1.65306	0.503882	0.00862461	0	0.678775	3.06291		0.664834	-0.567492	0.00844747	0	0	0.0821565	0.809554	0.00250063	0.668811	0.667067	0.106054
136-1	Zapolarnaya	concentrates	3.6	5.2	49.6	29.8042	0.4		11	99.6042	4	0.0941109	0.212994	1.3629	0.866247	0.0117748	0	0.569914	3.11794		0.548356	-0.457217	0.0113294	0	0	0.151307	0.655674	0.090551	0.508103	0.636927	0.112671
136-1	Zapolarnaya	concentrates	0.1	4.9	62.1	18.1979	0.4		12.3039	98.0018	4	0.00258574	0.198522	1.68781	0.523158	0.0116467	0	0.630532	3.05425		0.619333	-0.533275	0.0114398	0	0	0.0710492	0.828913	0.00253982	0.624894	0.723472	0.097746
139-8	Zapolarnaya	concentrates	3.9	18.5	38.1	23.565	0.3		12.6235	96.9885	4	0.0957606	0.711738	0.983315	0.643305	0.00829467	0	0.614301	3.05671		0.602903	-0.261778	0.00814077	0	0	0.0742145	0.482535	0.0939839	0.55524	0.764909	0.385497
139-8	Zapolarnaya	concentrates	4.6	14.5	41.7	24.0362	0.3		12.6113	97.7475	4	0.114228	0.56417	1.08842	0.663603	0.00838867	0	0.620662	3.05948		0.608596	-0.34022	0.0082256	0	0	0.0777587	0.533632	0.112008	0.551374	0.761001	0.311491
139-8	Zapolarnaya	concentrates	3.1	5.8	55.1	22.3736	0.4		11.5127	98.2863	4	0.0800788	0.234752	1.49607	0.642567	0.0116351	0	0.589403	3.05451		0.578885	-0.475031	0.0114275	0	0	0.0713811	0.734688	0.0786498	0.542422	0.773788	0.125122
139-8	Zapolarnaya	concentrates	7.6	9.2	39.9	28.4773	0.5		12.1666	97.8439	4	0.194787	0.369454	1.07489	0.811468	0.0144302	0	0.618009	3.08304		0.601363	-0.435653	0.0140415	0	0	0.107738	0.52297	0.189541	0.511581	0.727112	0.22179
139-8	Zapolarnaya	concentrates	0	8.4	62	17.0849	0.4		11.016	98.9009	4	0	0.331581	1.6418	0.478546	0.0113475	0	0.550031	3.01331		0.547602	-0.393841	0.0112974	0	0	0.0176656	0.817276	0	0.553859	0.925842	0.165058
139-8	Zapolarnaya	concentrates	2.4	9.5	49.7	23.515	0.3		11.9034	97.3184	4	0.0617124	0.382746	1.34327	0.672254	0.00868637	0	0.606612	3.07528		0.591763	-0.413548	0.00847373	0	0	0.0979164	0.655193	0.0602017	0.562658	0.701382	0.198647
139-8	Zapolarnaya	concentrates	3.3	5.9	56.5	19.3708	0.4		13.1386	98.6094	4	0.0837703	0.234668	1.50754	0.546701	0.0114338	0	0.661005	3.04512		0.65121	-0.546879	0.0112644	0	0	0.0592726	0.742603	0.082529	0.607889	0.779901	0.125994
139-8	Zapolarnaya	concentrates	0.1	6.9	56	24.9705	0.3		9.9827	98.2532	4	0.00262133	0.283398	1.54296	0.727741	0.00885521	0	0.51862	3.0842		0.504462	-0.375244	0.00861347	0	0	0.109199	0.75042	0.00254977	0.507539	0.691472	0.138183
139-8	Zapolarnaya	concentrates	2.4	6.1	52.2	27.3736	0.4		9.843	98.3166	4	0.0632285	0.251801	1.4455	0.801791	0.0118664	0	0.513935	3.08812		0.49927	-0.38849	0.0115277	0	0	0.114142	0.702125	0.0614243	0.475542	0.706918	0.130312
139-8	Zapolarnaya	concentrates	0.9	4.8	61.1	20.704	0.4		10.3601	98.2641	4	0.0234655	0.19609	1.67446	0.600161	0.0117437	0	0.535341	3.04126		0.528079	-0.442948	0.0115843	0	0	0.0542672	0.825871	0.0231472	0.522042	0.816671	0.0990065
139-8	Zapolarnaya	concentrates	0.1	29.8	26.9	25.6437	0.2		13.8873	96.531	4	0.00236814	1.10573	0.669584	0.675173	0.00533326	0	0.651785	3.10997		0.628736	-0.100566	0.00514467	0	0	0.141447	0.322953	0.0022844	0.63054	0.565645	0.534537
139-8	Zapolarnaya	concentrates	0.2	10.9	52.5	22.3603	0.4		11.6923	98.0526	4	0.00508661	0.434361	1.40347	0.632271	0.0114555	0	0.589355	3.076		0.574794	-0.374152	0.0111725	0	0	0.0988275	0.684397	0.00496093	0.578387	0.679469	0.212871
139-8	Zapolarnaya	concentrates	3.9	7.2	47.3	28.3365	0.4		10.5193	97.6558	4	0.102564	0.296679	1.30748	0.828518	0.0118453	0	0.54827	3.09536		0.53138	-0.39909	0.0114803	0	0	0.123225	0.633601	0.099404	0.488435	0.693085	0.159639
139-8	Zapolarnaya	concentrates	2.8	10.1	49.2	24.4514	0.4		11.3108	98.2622	4	0.0713552	0.403288	1.31789	0.692783	0.0114784	0	0.571268	3.06806		0.558596	-0.372649	0.0112238	0	0	0.088731	0.644326	0.0697723	0.5277	0.73803	0.21196
139-8	Zapolarnaya	concentrates	0.5	12.8	53.1	18.0479	0.3		12.595	97.3429	4	0.0124868	0.500861	1.39387	0.50111	0.00843642	0	0.623388	3.04015		0.615155	-0.376357	0.008325	0	0	0.0528255	0.687729	0.0123219	0.612706	0.786344	0.250206
139-8	Zapolarnaya	concentrates	2.6	5.8	55.8	22.4083	0.4		10.966	97.9743	4	0.0675736	0.236188	1.52434	0.6475	0.0117063	0	0.564847	3.05216		0.555194	-0.450625	0.0115062	0	0	0.0683581	0.749147	0.0664188	0.526294	0.785184	0.124334
139-8	Zapolarnaya	concentrates	2.1	16.3	42.6	24.6982	0.3		11.9003	97.8985	4	0.0521554	0.634298	1.11208	0.68198	0.0083899	0	0.585756	3.07466		0.571533	-0.270271	0.00818618	0	0	0.0971256	0.542537	0.050889	0.548127	0.708078	0.32604
139-8	Zapolarnaya	concentrates	0.1	19.3	41.3	24.4656	0.3		12.1186	97.5842	4	0.0024656	0.7456	1.07033	0.670663	0.00832912	0	0.59218	3.08957		0.575013	-0.221108	0.00808766	0	0	0.115963	0.51965	0.00239412	0.578305	0.643859	0.362861
139-8	Zapolarnaya	concentrates	1	5	61.5	19.9022	0.4		10.9834	98.7856	4	0.0257963	0.202094	1.66755	0.5708	0.0116191	0	0.56153	3.03938		0.554254	-0.465985	0.0114685	0	0	0.0518318	0.822969	0.025462	0.546605	0.816005	0.102343
139-8	Zapolarnaya	concentrates	4.3	8.6	41.9	33.1243	0.4		10.3122	98.6365	4	0.112721	0.353231	1.1545	0.965401	0.0118073	0	0.535754	3.13341		0.512942	-0.355151	0.0113046	0	0	0.170311	0.552672	0.107921	0.46775	0.63148	0.189553
139-8	Zapolarnaya	concentrates	1.9	18	40.9	21.1771	0.2		14.5115	96.6886	4	0.0465914	0.691594	1.0542	0.57736	0.00552253	0	0.705251	3.08051		0.686818	-0.355438	0.00537819	0	0	0.104546	0.513321	0.0453737	0.660405	0.628128	0.352765
139-8	Zapolarnaya	concentrates	0.1	26.8	34.1	21.6167	0.3		14.4667	97.3834	4	0.00235303	0.988071	0.843387	0.565514	0.00794884	0	0.674645	3.08192		0.656713	-0.183547	0.00773756	0	0	0.106321	0.410485	0.00229048	0.66031	0.613716	0.482008
139-8	Zapolarnaya	concentrates	1	5.4	61.2	19.7808	0.4		11.0874	98.8682	4	0.025707	0.217506	1.65367	0.565356	0.0115789	0	0.564886	3.0387		0.557691	-0.461754	0.0114314	0	0	0.050949	0.816303	0.0253796	0.550019	0.817438	0.110164
139-8	Zapolarnaya	concentrates	0.1	5.5	65.1	16.5393	0.5		11.7718	99.5111	4	0.00253087	0.218101	1.73179	0.465385	0.0142494	0	0.590462	3.02252		0.586062	-0.491967	0.0141432	0	0	0.0298053	0.859445	0.00251201	0.592959	0.87095	0.108511
139-8	Zapolarnaya	concentrates	4.2	13.4	35.4	32.3002	0.3		11.2006	96.8008	4	0.108981	0.544797	0.9655	0.931825	0.00876557	0	0.576002	3.13587		0.551045	-0.298835	0.00838578	0	0	0.173311	0.461833	0.10426	0.502836	0.611171	0.290928
139-8	Zapolarnaya	concentrates	0.2	5.5	63	18.8087	0.4		10.4693	98.378	4	0.00516907	0.222726	1.71147	0.540467	0.0116412	0	0.536265	3.02773		0.531352	-0.432544	0.0115346	0	0	0.0366406	0.847895	0.00512172	0.534782	0.863158	0.110911
139-8	Zapolarnaya	concentrates	2	5.6	57.9	20.7845	0.4		11.3863	98.0708	4	0.0517549	0.227057	1.57487	0.597981	0.0116557	0	0.58396	3.04728		0.574899	-0.474607	0.0114748	0	0	0.0620625	0.775218	0.0509519	0.553066	0.789155	0.117768
139-8	Zapolarnaya	concentrates	3.4	7.2	49.2	27.594	0.4		9.844	97.638	4	0.0895135	0.297008	1.36151	0.8077	0.0118584	0	0.513642	3.08123		0.500101	-0.367057	0.0115458	0	0	0.10545	0.662807	0.0871537	0.464947	0.731818	0.158394
139-8	Zapolarnaya	concentrates	0	43.49	24.1	9.81997	0.59		19.5	97.5	4	0	1.43126	0.532066	0.229319	0.0139544	0	0.811739	3.01834		0.806808	-0.109395	0.0138696	0	0	0.0243013	0.264417	0	0.818155	0.786761	0.711282
139-8	Zapolarnaya	concentrates	2.11	37.28	22.32	18.64	0		16.86	97.21	4	0.0465867	1.28968	0.517987	0.457565	0	0	0.737762	3.04958		0.725767	-0.0914116	0	0	0	0.065032	0.254783	0.0458293	0.693963	0.71105	0.664824
139-8	Zapolarnaya	concentrates	2.6	13.8	47.4	18.9097	0.3		13.7965	96.8062	4	0.0645675	0.536965	1.23727	0.522097	0.00838914	0	0.679029	3.04832		0.668266	-0.412296	0.00825617	0	0	0.0634001	0.608829	0.0635441	0.633255	0.753221	0.282156
139-8	Zapolarnaya	concentrates	0.2	13.9	53.3	16.5352	0.4		12.8989	97.2341	4	0.00495347	0.539412	1.38756	0.455319	0.0111557	0	0.633157	3.03156		0.626566	-0.370707	0.0110395	0	0	0.0416414	0.686558	0.00490191	0.630435	0.815165	0.268213
139-8	Zapolarnaya	concentrates	0.2	13.7	51.1	19.8042	0.3		12.6327	97.7369	4	0.00498261	0.534778	1.33811	0.548543	0.00841596	0	0.623738	3.05857		0.611793	-0.35778	0.0082548	0	0	0.0765998	0.656245	0.00488719	0.61386	0.715263	0.263557
139-8	Zapolarnaya	concentrates	0.4	21.8	35.5	26.8341	0.3		12.6776	97.5117	4	0.00979764	0.836651	0.913977	0.73076	0.00827444	0	0.615429	3.11489		0.592729	-0.197803	0.00796925	0	0	0.147535	0.440133	0.00943627	0.591861	0.580753	0.406734
139-8	Zapolarnaya	concentrates	0.3	28.7	33.6	19.3085	0.3		13.8853	96.0938	4	0.00704422	1.05589	0.829271	0.504065	0.00793211	0	0.646169	3.05037		0.635498	-0.124071	0.00780112	0	0	0.066056	0.407788	0.00692789	0.636054	0.733506	0.52285
139-8	Zapolarnaya	concentrates	0	26.9	41.6	14.5768	0.3		13.7975	97.1743	4	0	0.976214	1.01276	0.375366	0.00782426	0	0.633353	3.00551		0.632191	-0.15279	0.00780991	0	0	0.00733928	0.505449	0	0.637167	0.960823	0.487211
139-8	Zapolarnaya	concentrates	1.1	3.5	62.5	19.536	0.4		11.374	98.41	4	0.028631	0.142738	1.7099	0.565336	0.0117236	0	0.586728	3.04505		0.578047	-0.519284	0.0115501	0	0	0.0591808	0.842299	0.0282074	0.568576	0.787491	0.0723538
139-8	Zapolarnaya	concentrates	2.1	28.1	31.6	20.5479	0.3		14.3126	96.9605	4	0.0489471	1.02622	0.774177	0.532477	0.00787381	0	0.661159	3.05085		0.650138	-0.153323	0.00774256	0	0	0.0666753	0.380636	0.0481312	0.624899	0.745321	0.53007
139-8	Zapolarnaya	concentrates	0.8	19.1	39.9	24.6777	0.3		12.6103	97.388	4	0.0197329	0.738179	1.03448	0.676758	0.00833257	0	0.616462	3.09394		0.597745	-0.247942	0.00807957	0	0	0.12145	0.501533	0.0191338	0.591209	0.629843	0.364864
139-8	Zapolarnaya	concentrates	4.1	13.5	37.8	30.0868	0.3		11.986	97.7728	4	0.104412	0.538677	1.01183	0.851866	0.00860291	0	0.604953	3.12034		0.581623	-0.330943	0.00827113	0	0	0.154261	0.486402	0.100386	0.532566	0.623301	0.287847
139-8	Zapolarnaya	concentrates	0	5.6	63.6	17.0707	0.3		11.7606	98.3313	4	0	0.224894	1.71343	0.486453	0.00865845	0	0.597409	3.03084		0.59133	-0.488598	0.00857034	0	0	0.0407014	0.847996	0	0.596442	0.83094	0.111303
139-8	Zapolarnaya	concentrates	0.6	25.6	34.6	21.4679	0.3		14.6084	97.1763	4	0.0141947	0.948945	0.860392	0.564665	0.00799194	0	0.684947	3.08114		0.66691	-0.212713	0.00778148	0	0	0.105333	0.418868	0.0138209	0.662906	0.616828	0.468453
139-8	Zapolarnaya	concentrates	1.6	6.6	56.9	22.6337	0.4		10.8171	98.9508	4	0.0411638	0.266052	1.5387	0.647409	0.0115881	0	0.551551	3.05646		0.541362	-0.422168	0.011374	0	0	0.0738912	0.755137	0.0404034	0.52609	0.767436	0.136066
139-8	Zapolarnaya	concentrates	0.3	20.9	35.1	27.5531	0.3		13.2865	97.4396	4	0.00739076	0.806753	0.908909	0.754683	0.00832233	0	0.64872	3.13478		0.620829	-0.24276	0.00796451	0	0	0.171978	0.434915	0.007073	0.621383	0.523762	0.388783
139-8	Zapolarnaya	concentrates	0.6	28.3	32.1	20.3571	0.3		15.0593	96.7164	4	0.0140236	1.03639	0.788604	0.528995	0.00789561	0	0.697578	3.07348		0.6809	-0.182803	0.00770684	0	0	0.0956329	0.384875	0.0136883	0.676851	0.629579	0.512823
139-8	Zapolarnaya	concentrates	0.1	24.2	45.3	14.0913	0.3		14.3718	98.3631	4	0.00231232	0.876776	1.10101	0.362264	0.00781131	0	0.658624	3.0088		0.656698	-0.22738	0.00778848	0	0	0.0116931	0.548895	0.00230556	0.660319	0.935255	0.438117
139-8	Zapolarnaya	concentrates	4.3	8.5	45	28.6935	0.3		10.7253	97.5188	4	0.112402	0.348137	1.23641	0.833903	0.00883043	0	0.55564	3.09532		0.538529	-0.378379	0.00855849	0	0	0.123184	0.599167	0.10894	0.489402	0.695172	0.189334
139-8	Zapolarnaya	concentrates	0.5	19.6	41.6	19.8613	0.3		14.941	96.8023	4	0.0121444	0.745913	1.06205	0.53634	0.00820508	0	0.719224	3.08388		0.699663	-0.344832	0.00798191	0	0	0.108792	0.516581	0.0118141	0.696992	0.582976	0.36715
139-8	Zapolarnaya	concentrates	3.8	5.5	51.6	27.2187	0.4		9.8114	98.3301	4	0.0999743	0.226722	1.42692	0.796156	0.0118501	0	0.511581	3.0732		0.499396	-0.400303	0.0115678	0	0	0.0952808	0.696466	0.0975929	0.459838	0.754807	0.122628
139-8	Zapolarnaya	concentrates	0.1	30.7	31.6	18.9535	0.3		14.2565	95.91	4	0.00232774	1.11969	0.773155	0.490513	0.00786341	0	0.657697	3.05125		0.646651	-0.103939	0.00773134	0	0	0.0671839	0.380085	0.00228864	0.650189	0.721387	0.551706
139-8	Zapolarnaya	concentrates	0	6.5	63.4	15.0878	0.3		12.2441	97.5319	4	0	0.260115	1.702	0.428427	0.00862784	0	0.619771	3.01894		0.615882	-0.495215	0.00857371	0	0	0.0250975	0.845661	0	0.621208	0.882099	0.129241
139-8	Zapolarnaya	concentrates	1.1	6.7	58.8	18.9515	0.4		11.678	97.6295	4	0.0283287	0.270356	1.59169	0.542631	0.0115998	0	0.596049	3.04065		0.588081	-0.466155	0.0114447	0	0	0.0534759	0.785203	0.02795	0.578532	0.800231	0.137206
109\1	Zapolarnaya	concentrates	1	31.2	26.2	22.4175	0.2		15.2847	96.3022	4	0.0232452	1.13636	0.640148	0.579359	0.00523504	0	0.704158	3.0885		0.68398	-0.137168	0.00508502	0	0	0.114621	0.310902	0.0225791	0.67222	0.592643	0.564646
109\1	Zapolarnaya	concentrates	0.1	25.7	37	20.607	0.3		13.463	97.17	4	0.0023687	0.953827	0.921207	0.542689	0.00800179	0	0.632021	3.06011		0.619605	-0.159905	0.0078446	0	0	0.0785778	0.451555	0.00232217	0.623046	0.704611	0.468633
109\1	Zapolarnaya	concentrates	0.4	21.3	44.8	15.8314	0.3		14.4422	97.0736	4	0.00952059	0.794346	1.1208	0.418937	0.00804046	0	0.681265	3.03291		0.673874	-0.288963	0.00795322	0	0	0.0434007	0.554318	0.00941729	0.672888	0.790533	0.396598
109\1	Zapolarnaya	concentrates	0.1	17.8	49	15.2204	0.2		15.3571	97.6775	4	0.00239702	0.668524	1.23456	0.405623	0.0053983	0	0.729557	3.04606		0.718525	-0.394634	0.00531667	0	0	0.0604854	0.607946	0.00236077	0.720655	0.697187	0.329987
102-2\	Zapolarnaya	concentrates	0	3.8	64.5	17.8276	0.4		12.1	98.6276	4	0	0.153774	1.75097	0.511907	0.0116329	0	0.619351	3.04763		0.609671	-0.545437	0.0114511	0	0	0.0625148	0.8618	0	0.616734	0.75188	0.0756852
102-2\	Zapolarnaya	concentrates	0	4.8	62.5	18.7157	0.4		11.9	98.3157	4	0	0.194507	1.699	0.538147	0.0116488	0	0.609949	3.05325		0.599311	-0.5152	0.0114457	0	0	0.0697593	0.834683	0	0.60625	0.736141	0.0955573
102-2\	Zapolarnaya	concentrates	0.1	5.5	63	17.2868	0.4		12.1	98.3868	4	0.00256235	0.220815	1.69678	0.492471	0.0115413	0	0.614474	3.03864		0.60666	-0.509051	0.0113945	0	0	0.0508666	0.8376	0.00252977	0.612086	0.790762	0.10928
102-2\	Zapolarnaya	concentrates	0.1	4.2	63.2	18.8551	0.4		12.1	98.8551	4	0.00257881	0.169705	1.7131	0.540598	0.0116154	0	0.618422	3.05602		0.607085	-0.535191	0.0114025	0	0	0.0733225	0.840849	0.00253154	0.612519	0.72367	0.0835087
102-2\	Zapolarnaya	concentrates	2	1.9	60.9	25.4601	0.4		9.1	99.7601	4	0.0528835	0.0787173	1.69259	0.748474	0.0119098	0	0.476882	3.06146		0.467308	-0.44041	0.0116707	0	0	0.0803026	0.829307	0.0518218	0.449269	0.781027	0.0406764
102-2\	Zapolarnaya	concentrates	0.4	8.9	58.6	18.0055	0.4		12.9	99.2055	4	0.00999097	0.348308	1.53848	0.50001	0.0112503	0	0.638582	3.04662		0.628811	-0.468399	0.0110781	0	0	0.0612048	0.757468	0.0098381	0.629591	0.751381	0.173193
102-2\	Zapolarnaya	concentrates	2.8	5.3	56	22.2591	0.3		12.6	99.2591	4	0.0716084	0.212377	1.50536	0.632906	0.00863938	0	0.638639	3.06953		0.624174	-0.528834	0.0084437	0	0	0.0906007	0.73563	0.0699864	0.587987	0.707064	0.111593
102-2\	Zapolarnaya	concentrates	0	4.3	64.2	18.1427	0.4		12.1	99.1427	4	0	0.172833	1.73106	0.51744	0.0115544	0	0.615171	3.04805		0.605472	-0.53179	0.0113722	0	0	0.0630631	0.851883	0	0.612437	0.752345	0.0850539
132-17	Zapolarnaya	concentrates	5.6	6.5	36.9	43.0183	0.5		8.1	100.618	4	0.150235	0.273227	1.04053	1.28311	0.0151046	0	0.430674	3.19288		0.404656	-0.290488	0.0141921	0	0	0.241643	0.488837	0.14116	0.359067	0.599132	0.149458
132-17	Zapolarnaya	concentrates	0	4.2	65.5	16.6961	0.4		12.1	98.8961	4	0	0.16859	1.76378	0.475553	0.0115391	0	0.614358	3.03382		0.60751	-0.535565	0.0114105	0	0	0.0445861	0.872058	0	0.614522	0.810374	0.0833555
132-17	Zapolarnaya	concentrates	1.4	7.1	56.3	22.1468	0.4		12.2	99.5468	4	0.0355545	0.282521	1.50286	0.625322	0.0114388	0	0.614052	3.07175		0.599708	-0.472919	0.0111716	0	0	0.0934354	0.73388	0.034724	0.585909	0.694013	0.142924
132-17	Zapolarnaya	concentrates	0.2	5.7	60.7	20.1104	0.4		12.1	99.2104	4	0.00511871	0.228576	1.63292	0.57224	0.0115278	0	0.613754	3.06413		0.600908	-0.500298	0.0112865	0	0	0.0837229	0.79937	0.00501157	0.604702	0.70113	0.11246
132-17	Zapolarnaya	concentrates	2.1	5.3	52.9	26.782	0.3		12	99.382	4	0.0545603	0.215754	1.44464	0.773617	0.00877676	0	0.617899	3.11524		0.595041	-0.499607	0.00845208	0	0	0.147975	0.695597	0.0525419	0.569914	0.602751	0.109647
132-17	Zapolarnaya	concentrates	0	5.9	61	19.4178	0.4		12.7	99.4178	4	0	0.235149	1.63095	0.54915	0.0114573	0	0.640247	3.06695		0.626271	-0.52247	0.0112071	0	0	0.0873198	0.797672	0	0.633369	0.674885	0.115008
132-17	Zapolarnaya	concentrates	2.6	5.1	56.9	22.4307	0.4		12.5	99.9307	4	0.0662165	0.203512	1.52318	0.635129	0.0114712	0	0.630932	3.07044		0.616457	-0.528244	0.011208	0	0	0.0917632	0.744118	0.0646975	0.585158	0.704256	0.106299
132-17	Zapolarnaya	concentrates	0	4.7	63.8	18.3278	0.3		12.2	99.3278	4	0	0.188185	1.71367	0.520713	0.00863252	0	0.617874	3.04907		0.60793	-0.523845	0.00849359	0	0	0.0643776	0.843044	0	0.613137	0.748688	0.0925781
132-17	Zapolarnaya	concentrates	0	4.7	62.9	18.097	0.4		12.5	98.597	4	0	0.189357	1.70001	0.517355	0.0115817	0	0.637009	3.05532		0.625476	-0.543884	0.011372	0	0	0.0724183	0.834618	0	0.632671	0.714882	0.0929642
132-17	Zapolarnaya	concentrates	0	4.5	63.1	18.3726	0.4		12.4	98.7726	4	0	0.181353	1.70593	0.52539	0.0115852	0	0.632102	3.05636		0.620446	-0.542813	0.0113715	0	0	0.0737598	0.837236	0	0.627582	0.713944	0.0890045
132-17	Zapolarnaya	concentrates	0	4.4	64.7	17.7153	0.4		12.3	99.5153	4	0	0.175787	1.73404	0.502208	0.0114848	0	0.621573	3.04509		0.61237	-0.537092	0.0113148	0	0	0.0592283	0.85418	0	0.619378	0.760584	0.0865921
132-17	Zapolarnaya	concentrates	0.2	24	31.3	29.0595	0.3		13.8	98.6595	4	0.00481487	0.905299	0.792035	0.777802	0.00813264	0	0.658435	3.14652		0.627775	-0.203957	0.00775394	0	0	0.186261	0.377577	0.00459067	0.629767	0.497668	0.433562
132-17	Zapolarnaya	concentrates	0	5.2	61.8	19.241	0.3		12	98.541	4	0	0.210028	1.67449	0.551446	0.00870814	0	0.613069	3.05774		0.601492	-0.507004	0.0085437	0	0	0.0755339	0.821435	0	0.606675	0.720779	0.103031
132-17	Zapolarnaya	concentrates	0	5.1	64.4	17.1433	0.4		12.2	99.2433	4	0	0.203315	1.72228	0.484948	0.0114601	0	0.615194	3.0372		0.607659	-0.518566	0.0113197	0	0	0.0489936	0.850594	0	0.614616	0.795437	0.100412
132-17	Zapolarnaya	concentrates	0.1	4.7	62.8	19.1744	0.4		11.7	98.8744	4	0.00257704	0.189778	1.70109	0.549376	0.0116075	0	0.597567	3.05199		0.587387	-0.505524	0.0114097	0	0	0.0681404	0.836054	0.00253314	0.592648	0.747636	0.0935093
132-17	Zapolarnaya	concentrates	1.6	5.2	59.4	19.8972	0.4		12.7	99.1972	4	0.040812	0.207825	1.59257	0.564269	0.011489	0	0.642022	3.05899		0.629642	-0.539001	0.0112675	0	0	0.077136	0.780931	0.0400249	0.612041	0.721223	0.106157
132-17	Zapolarnaya	concentrates	0.3	6.7	59.9	17.8515	0.3		12.5	97.5515	4	0.0077048	0.269613	1.61701	0.509732	0.00867595	0	0.636252	3.04898		0.62603	-0.501926	0.00853656	0	0	0.0642638	0.795514	0.00758101	0.626629	0.743735	0.133654
132-17	Zapolarnaya	concentrates	0	3.4	63.6	18.8125	0.3		11.6	97.7125	4	0	0.139723	1.75334	0.548576	0.00886012	0	0.602976	3.05347		0.592417	-0.532484	0.00870497	0	0	0.0700455	0.861316	0	0.597619	0.740076	0.0686381
132-17	Zapolarnaya	concentrates	0.5	5.7	60.7	18.5442	0.3		12.1	97.8442	4	0.0129003	0.230425	1.64612	0.531941	0.00871577	0	0.618718	3.04882		0.60881	-0.504019	0.00857619	0	0	0.0640573	0.809882	0.0126937	0.606314	0.755236	0.114825
132-17	Zapolarnaya	concentrates	0.9	7.4	57.6	20.1521	0.4		12.7	99.1521	4	0.0227801	0.293475	1.53243	0.567099	0.0114006	0	0.637083	3.06427		0.623721	-0.491223	0.0111615	0	0	0.0838926	0.750145	0.0223023	0.616849	0.697796	0.146937
110\2	Zapolarnaya	concentrates	0.1	10.6	53.2	20.9232	0.3		12.4	97.5232	4	0.00254507	0.4227	1.42317	0.592045	0.00859759	0	0.625462	3.07452		0.610302	-0.412464	0.00838921	0	0	0.0969515	0.694338	0.00248338	0.613928	0.664351	0.206741
110\2	Zapolarnaya	concentrates	2.3	8.1	52.7	20.4887	0.4		13.3	97.2887	4	0.0588553	0.324765	1.41747	0.582905	0.0115259	0	0.67451	3.07003		0.659124	-0.511709	0.0112629	0	0	0.0912412	0.692568	0.0575128	0.629987	0.679635	0.168361
82	Zimnaya	concentrates	0.03	37.31	32.06	12.7699	0.22		16.98	99.3699	4	0.000643798	1.25453	0.723165	0.304679	0.00531627	0	0.72218	3.01051		0.719658	-0.0998826	0.00529771	0	0	0.013965	0.36032	0.00064155	0.723025	0.908009	0.625475
14	Zimnaya	concentrates	0.03	12.04	56.87	17.6499	0.33		12.57	99.4899	4	0.000736518	0.463143	1.46754	0.481761	0.00912288	0	0.611613	3.03392		0.604775	-0.384813	0.00902088	0	0	0.0447213	0.725568	0.000728284	0.609832	0.812243	0.229149
72	Zimnaya	concentrates	0.02	14.6	55.73	16.43	0.31		12.65	99.74	4	0.000482196	0.551534	1.4123	0.440409	0.0084161	0	0.604454	3.0176		0.600929	-0.335137	0.00836702	0	0	0.0233285	0.702033	0.000479384	0.605706	0.893438	0.27429
95	Zimnaya	concentrates	3.01	5.79	51.8	27.4399	0.42		10.66	99.1199	4	0.0784844	0.236549	1.41968	0.795474	0.0123317	0	0.550875	3.0934		0.534242	-0.431498	0.0119593	0	0	0.120772	0.68841	0.0761147	0.502034	0.686899	0.124153
19	Zimnaya	concentrates	3.47	5.63	49.36	28.9499	0.38		10.65	98.4399	4	0.091486	0.232573	1.36787	0.848592	0.0112814	0	0.556486	3.10829		0.537098	-0.435751	0.0108884	0	0	0.139358	0.660108	0.0882987	0.498508	0.6597	0.123105
73	Zimnaya	concentrates	3.14	6.11	55.12	20.6699	0.34		13	98.3799	4	0.0801667	0.244417	1.47917	0.586718	0.0097746	0	0.657789	3.05804		0.645305	-0.535005	0.00958909	0	0	0.0759158	0.72555	0.0786452	0.603621	0.736212	0.130123
36	Zimnaya	concentrates	0.2	16.64	48.3	20.3499	0.34		13.23	99.0599	4	0.00485175	0.632481	1.23157	0.548854	0.00928758	0	0.636073	3.06312		0.622966	-0.322338	0.00909619	0	0	0.0824268	0.603098	0.00475177	0.625684	0.693321	0.311203
16	Zimnaya	concentrates	0.22	5.13	64.17	16.6199	0.3		12.88	99.3199	4	0.00556915	0.203474	1.70743	0.467757	0.00855152	0	0.646191	3.03898		0.637904	-0.545913	0.00844184	0	0	0.0513029	0.842767	0.00549772	0.639787	0.777793	0.100988
83	Zimnaya	concentrates	0.26	6.24	62.34	17.0599	0.34		13.2	99.4399	4	0.00654148	0.245988	1.6486	0.477207	0.00963247	0	0.658197	3.04617		0.648222	-0.536578	0.00948648	0	0	0.0606205	0.811807	0.00644235	0.650201	0.742027	0.121915
47	Zimnaya	concentrates	3.45	13.32	47.21	19.2499	0.27		15.65	99.1499	4	0.0834532	0.504841	1.20034	0.517701	0.00735434	0	0.75027	3.06396		0.734609	-0.494658	0.00720082	0	0	0.0834965	0.587641	0.0817112	0.683668	0.670557	0.269143
57	Zimnaya	concentrates	3.8	6.11	54.02	22.1399	0.31		13.28	99.6599	4	0.0959507	0.241731	1.43372	0.621536	0.00881418	0	0.664571	3.06632		0.650197	-0.540569	0.00862353	0	0	0.0865189	0.701355	0.0938753	0.599121	0.715442	0.130502
76	Zimnaya	concentrates	0.69	7.57	56.77	22.2599	0.36		12.14	99.7899	4	0.0174803	0.300484	1.51169	0.626974	0.0102697	0	0.609532	3.07643		0.594389	-0.457894	0.0100145	0	0	0.0993774	0.737067	0.017046	0.590239	0.674917	0.14905
12	Zimnaya	concentrates	3.67	8.19	53.07	19.5599	0.35		14.6	99.4399	4	0.090989	0.318151	1.38298	0.539159	0.00977117	0	0.717389	3.05844		0.703681	-0.557229	0.00958445	0	0	0.0764356	0.678279	0.0892503	0.651758	0.71094	0.171327
80	Zimnaya	concentrates	2.79	3.46	60.55	18.48	0.36		13.28	98.92	4	0.071333	0.138608	1.62722	0.52531	0.0103644	0	0.67292	3.04575		0.662811	-0.604757	0.0102087	0	0	0.0600885	0.801387	0.0702614	0.625263	0.767737	0.0734217
87	Zimnaya	concentrates	0.44	29.86	23.96	30.0298	0.17		14.55	99.0098	4	0.0102773	1.09281	0.588247	0.779841	0.00447129	0	0.67355	3.1492		0.64164	-0.125382	0.00425946	0	0	0.189503	0.280189	0.00979044	0.638111	0.489827	0.525664
37	Zimnaya	concentrates	0.33	47.27	15.67	15.13	0.17		19.9	98.47	4	0.00684236	1.53569	0.341512	0.348784	0.00396914	0	0.817757	3.05456		0.803151	-0.0529182	0.00389825	0	0	0.071442	0.167706	0.00672015	0.800891	0.582887	0.759234
45	Zimnaya	concentrates	4.56	8.51	47.12	24.3999	0.33		13.99	98.9099	4	0.114978	0.336207	1.24882	0.684015	0.00936958	0	0.699113	3.09251		0.6782	-0.524215	0.00908931	0	0	0.119652	0.605734	0.111539	0.615176	0.639359	0.183548
74	325 let Yakutii	concentrates	0.99	6.48	54.31	26.2599	0.43		9.88	98.3499	4	0.0260357	0.267015	1.50127	0.767811	0.0127338	0	0.514956	3.08982		0.499986	-0.382723	0.0123636	0	0	0.116281	0.728814	0.0252788	0.493611	0.688043	0.132988
65	325 let Yakutii	concentrates	1.27	7.25	53.7	25.5099	0.35		10.56	98.6399	4	0.0330019	0.295188	1.46675	0.737005	0.0102414	0	0.543849	3.08603		0.528688	-0.395164	0.00995588	0	0	0.11151	0.712928	0.0320819	0.517243	0.688718	0.148235
103	325 let Yakutii	concentrates	1.49	1.4	56.56	31.7999	0.49		6.68	98.4199	4	0.0412195	0.0606835	1.64464	0.978067	0.015264	0	0.366245	3.10612		0.353732	-0.33917	0.0147425	0	0	0.136658	0.794226	0.0398112	0.345082	0.710671	0.0305202
92	325 let Yakutii	concentrates	1.75	1.36	54.41	33.4899	0.47		6.8	98.2799	4	0.048705	0.0593063	1.5917	1.03628	0.0147295	0	0.37508	3.12579		0.359985	-0.345662	0.0141368	0	0	0.160976	0.76382	0.046745	0.348617	0.676292	0.0298554
50	325 let Yakutii	concentrates	1.94	8.95	53.91	19.0799	0.33		13.96	98.1699	4	0.0487547	0.352423	1.42406	0.53311	0.00933866	0	0.695311	3.063		0.68101	-0.517569	0.00914657	0	0	0.0822747	0.697386	0.0477519	0.655696	0.684859	0.181242
153	325 let Yakutii	concentrates	2.1	7.75	55.64	21.6599	0.39		12.25	99.7899	4	0.0528507	0.305604	1.47185	0.606057	0.0110523	0	0.611007	3.05842		0.599336	-0.460294	0.0108411	0	0	0.076408	0.721868	0.0518411	0.575731	0.742942	0.158078
84	325 let Yakutii	concentrates	2.1	7.71	53	22.4598	0.37		12.86	98.4998	4	0.0535858	0.308256	1.42152	0.637183	0.0106313	0	0.650355	3.08153		0.633149	-0.493449	0.0103501	0	0	0.105828	0.691954	0.0521681	0.607735	0.658798	0.158309
93	325 let Yakutii	concentrates	2.28	1.48	57.18	28.1399	0.52		8.89	98.4899	4	0.0617543	0.0628088	1.62788	0.847386	0.0158596	0	0.477214	3.0929		0.46288	-0.447802	0.0153832	0	0	0.120148	0.789491	0.0598994	0.443153	0.707644	0.032402
45	325 let Yakutii	concentrates	2.33	1.79	54.94	31.7299	0.49		7.31	98.5899	4	0.063921	0.0769426	1.58424	0.967793	0.015137	0	0.397451	3.10549		0.383951	-0.361409	0.0146228	0	0	0.135872	0.765214	0.0617497	0.366671	0.709341	0.0396104
15	325 let Yakutii	concentrates	2.45	1.37	57.65	27.5799	0.5		9.13	98.6799	4	0.0660667	0.0578846	1.63403	0.826867	0.0151825	0	0.48794	3.08797		0.474039	-0.460671	0.0147499	0	0	0.113957	0.793741	0.0641845	0.451709	0.716281	0.0300463
30	325 let Yakutii	concentrates	2.52	1.21	57.61	27.8099	0.5		8.97	98.6199	4	0.0681198	0.0512489	1.63688	0.835794	0.0152194	0	0.480557	3.08782		0.46689	-0.456781	0.0147866	0	0	0.113759	0.795163	0.0661825	0.444067	0.719814	0.0266601
40	325 let Yakutii	concentrates	2.6	1.74	56.24	27.9099	0.42		9.42	98.3299	4	0.0702072	0.0736179	1.59624	0.8379	0.0127706	0	0.504125	3.09486		0.488672	-0.465371	0.0123792	0	0	0.122607	0.773657	0.0680552	0.4629	0.698093	0.0382863
140	325 let Yakutii	concentrates	2.66	1.24	48.16	37.2698	0.47		7.26	97.0598	4	0.0757186	0.0553055	1.44096	1.17952	0.0150652	0	0.409578	3.17615		0.386863	-0.374973	0.0142297	0	0	0.221838	0.680524	0.0715193	0.365901	0.601764	0.0281311
148	325 let Yakutii	concentrates	2.68	1.61	55.46	29.9698	0.54		8.36	98.6198	4	0.0728844	0.0686043	1.58535	0.906172	0.0165367	0	0.450593	3.10014		0.436039	-0.418847	0.0160025	0	0	0.129206	0.76707	0.0705301	0.413492	0.705312	0.035713
117	325 let Yakutii	concentrates	2.92	1.7	55.19	29.9299	0.48		9.06	99.2799	4	0.0785879	0.0716882	1.56127	0.895579	0.0145469	0	0.483259	3.10493		0.466927	-0.44635	0.0140553	0	0	0.135182	0.754254	0.075932	0.439719	0.687554	0.0374786
145	325 let Yakutii	concentrates	2.98	5.7	56.56	21.0099	0.37		12.6	99.2199	4	0.0757887	0.227138	1.51197	0.594073	0.0105961	0	0.635094	3.05466		0.62373	-0.5226	0.0104065	0	0	0.0715732	0.742458	0.0744326	0.586198	0.754652	0.120506
77	325 let Yakutii	concentrates	2.98	1.74	52.19	32.6599	0.44		7.71	97.7199	4	0.0825358	0.0755095	1.51935	1.0057	0.0137225	0	0.423214	3.12003		0.406932	-0.383824	0.0131946	0	0	0.153886	0.730451	0.0793605	0.381678	0.681727	0.0394316
11	325 let Yakutii	concentrates	3.27	1.58	51.76	32.7098	0.48		8.29	98.0898	4	0.0900838	0.0681996	1.49878	1.00185	0.01489	0	0.452619	3.12643		0.434316	-0.415883	0.0142879	0	0	0.161751	0.719087	0.086441	0.405087	0.663488	0.0358169
26	325 let Yakutii	concentrates	3.27	1.66	53.7	31.4099	0.51		8.76	99.3099	4	0.0883993	0.070313	1.52588	0.944048	0.0155248	0	0.469337	3.1135		0.452227	-0.433311	0.0149589	0	0	0.145821	0.735128	0.0851767	0.422556	0.679386	0.0370289
73	325 let Yakutii	concentrates	3.32	5.5	54.91	22.7	0.31		11.9	98.64	4	0.0855053	0.221944	1.48646	0.64999	0.00899027	0	0.607409	3.06029		0.595442	-0.495469	0.00881314	0	0	0.0788089	0.728585	0.0838207	0.553895	0.752634	0.118738
36	325 let Yakutii	concentrates	3.33	5.68	55.48	21.1099	0.36		12.23	98.1899	4	0.0856062	0.228789	1.49914	0.603356	0.0104212	0	0.623113	3.05043		0.612812	-0.510557	0.010249	0	0	0.0661255	0.73718	0.084191	0.570619	0.777123	0.122846
75	325 let Yakutii	concentrates	3.47	1.64	52.04	30.9498	0.47		9.11	97.6798	4	0.0951742	0.070479	1.50028	0.943789	0.0145159	0	0.495208	3.11945		0.476246	-0.456316	0.0139601	0	0	0.153163	0.721417	0.0915299	0.441963	0.662506	0.0373047
42	325 let Yakutii	concentrates	3.48	1.44	50.87	32.9599	0.48		8.64	97.8699	4	0.0960944	0.0623028	1.47647	1.01188	0.014925	0	0.472837	3.13452		0.452545	-0.437015	0.0142845	0	0	0.171659	0.706556	0.0919705	0.419923	0.6455	0.0328343
76	325 let Yakutii	concentrates	3.57	1.63	49.99	34.6798	0.43		7.43	97.7298	4	0.0994744	0.0711634	1.4641	1.07435	0.0134917	0	0.410309	3.13289		0.392904	-0.371751	0.0129194	0	0	0.169674	0.700999	0.0952548	0.363015	0.670145	0.0376597
100	325 let Yakutii	concentrates	3.64	1.67	49.82	34.8398	0.42		8.02	98.4098	4	0.100513	0.0722545	1.44601	1.06961	0.0130595	0	0.43891	3.14035		0.419294	-0.397257	0.0124758	0	0	0.178775	0.690691	0.096021	0.386965	0.650078	0.0381785
60	325 let Yakutii	concentrates	3.9	6.99	53.52	19.4399	0.29		14.03	98.1699	4	0.0985118	0.276648	1.42097	0.545939	0.00824854	0	0.702361	3.05268		0.690241	-0.56241	0.0081062	0	0	0.0690266	0.698225	0.0968118	0.634001	0.742687	0.150508
64	325 let Yakutii	concentrates	4	1.42	47.21	38.5098	0.47		6.97	98.5798	4	0.111943	0.0622662	1.38873	1.19822	0.0148112	0	0.386589	3.16256		0.366718	-0.351235	0.0140499	0	0	0.205604	0.658674	0.106189	0.33578	0.638221	0.0330415
53	325 let Yakutii	concentrates	4.11	1.56	44.87	40.6298	0.44		6.72	98.3298	4	0.116088	0.0690392	1.33213	1.2759	0.0139944	0	0.376178	3.18333		0.354514	-0.335171	0.0131884	0	0	0.23036	0.627706	0.109402	0.323398	0.61684	0.0365279
67	325 let Yakutii	concentrates	4.22	3.11	41.24	42.1198	0.42		7.01	98.1198	4	0.118902	0.137298	1.22135	1.31944	0.0133255	0	0.391449	3.20177		0.36678	-0.314943	0.0124857	0	0	0.252075	0.572193	0.111409	0.333763	0.592209	0.0723875
56	325 let Yakutii	concentrates	4.65	1.47	42.32	43.2397	0.39		6.21	98.2797	4	0.132574	0.065667	1.26822	1.37061	0.0125206	0	0.350893	3.20048		0.328912	-0.309872	0.0117363	0	0	0.250566	0.594389	0.124269	0.295643	0.609939	0.0351441
111	325 let Yakutii	concentrates	4.69	1.47	43.01	41.6898	0.45		6.64	97.9498	4	0.133367	0.0654969	1.28556	1.31805	0.0144094	0	0.374218	3.1911		0.351807	-0.334566	0.0135465	0	0	0.239547	0.604286	0.125381	0.31642	0.61336	0.0352007
13	325 let Yakutii	concentrates	4.89	1.48	40.94	43.8897	0.37		6.29	97.8597	4	0.140229	0.0664994	1.23402	1.39933	0.0119478	0	0.357486	3.20951		0.33415	-0.314239	0.0111678	0	0	0.261112	0.576734	0.131075	0.298373	0.600741	0.0357674
106	325 let Yakutii	concentrates	5.12	1.68	39.77	44.7998	0.39		6.54	98.2998	4	0.14618	0.0751543	1.19349	1.42207	0.0125383	0	0.370063	3.2195		0.344833	-0.321501	0.0116835	0	0	0.272709	0.556061	0.136214	0.306646	0.588399	0.040537
22	325 let Yakutii	concentrates	5.12	1.54	36.14	48.6697	0.38		5.74	97.5897	4	0.149757	0.0705773	1.1111	1.58272	0.0125158	0	0.332743	3.25941		0.306261	-0.285301	0.0115197	0	0	0.318348	0.511334	0.137839	0.271913	0.562935	0.0376729
57	325 let Yakutii	concentrates	5.22	1.37	38.7	45.8498	0.41		6.21	97.7598	4	0.150844	0.0620302	1.17547	1.47306	0.0133412	0	0.355654	3.2304		0.330287	-0.313874	0.0123897	0	0	0.285294	0.545818	0.140085	0.292887	0.582902	0.0334952
88	325 let Yakutii	concentrates	5.28	1.64	39.98	44.7597	0.41		6.48	98.5497	4	0.150302	0.0731477	1.19624	1.41659	0.0131423	0	0.365582	3.215		0.341133	-0.319269	0.0122634	0	0	0.267501	0.558121	0.14025	0.302427	0.595265	0.0396952
54	325 let Yakutii	concentrates	5.73	1.34	34.59	49.9997	0.42		5.83	97.9097	4	0.167589	0.0614077	1.06338	1.62587	0.0138324	0	0.33794	3.27002		0.310035	-0.294557	0.0126902	0	0	0.330295	0.487786	0.153751	0.271708	0.557131	0.0332863
89	325 let Yakutii	concentrates	0.08	43.23	24.74	10.28	0.16		18.4	96.89	4	0.00169451	1.43472	0.550808	0.242088	0.0038162	0	0.772417	3.00554		0.770993	-0.058766	0.00380916	0	0	0.00737629	0.274896	0.00169139	0.772629	0.938949	0.717249
69	325 let Yakutii	concentrates	0.01	44	24.92	9.26	0.16		18.99	97.34	4	0.000209607	1.44505	0.549033	0.215796	0.00377643	0	0.788877	3.00275		0.788156	-0.0700623	0.00377297	0	0	0.00365876	0.274266	0.000209415	0.790974	0.96606	0.722017
155	325 let Yakutii	concentrates	0.01	27.19	37.49	16.9899	0.23		16.42	98.3299	4	0.000228933	0.975313	0.90213	0.43244	0.00592914	0	0.745008	3.06105		0.730149	-0.25803	0.00581089	0	0	0.0797759	0.442069	0.000224367	0.734251	0.623535	0.478038
43	325 let Yakutii	concentrates	0.17	23.99	38.15	21.9799	0.29		14.42	98.9999	4	0.00399495	0.883322	0.942329	0.574267	0.0076739	0	0.671594	3.08318		0.653475	-0.231197	0.00746687	0	0	0.107914	0.458453	0.00388717	0.655823	0.613746	0.431422
21	325 let Yakutii	concentrates	0.34	13.94	43.8	28.1199	0.34		11.26	97.7999	4	0.00869216	0.55839	1.17698	0.799261	0.00978776	0	0.570514	3.12362		0.547935	-0.28919	0.00940039	0	0	0.158308	0.565198	0.00834815	0.548512	0.58754	0.270403
83	325 let Yakutii	concentrates	0.5	20.1	48.39	15.38	0.28		14.03	98.68	4	0.0117817	0.742094	1.1985	0.40292	0.00742934	0	0.655199	3.01792		0.651308	-0.28985	0.00738522	0	0	0.0237546	0.59569	0.0117117	0.648502	0.881384	0.373214
28	325 let Yakutii	concentrates	0.42	11.77	48.95	29.0298	0.44		8.31	98.9198	4	0.0108443	0.476162	1.32846	0.833342	0.0127926	0	0.425238	3.08684		0.413275	-0.194324	0.0124327	0	0	0.112533	0.645545	0.0105392	0.414059	0.722106	0.233847
139	325 let Yakutii	concentrates	0.28	13.84	52.74	18.6299	0.32		12.41	98.2199	4	0.00691747	0.535737	1.36954	0.511714	0.00890215	0	0.607632	3.04044		0.599549	-0.344027	0.00878374	0	0	0.0532074	0.675662	0.00682546	0.600725	0.789239	0.266122
62	325 let Yakutii	concentrates	0.07	16.45	52.8	16.71	0.29		12.26	98.58	4	0.00169438	0.623886	1.34336	0.449693	0.00790437	0	0.588143	3.01468		0.585279	-0.282721	0.00786587	0	0	0.0194808	0.668409	0.00168613	0.588918	0.912936	0.310948
17	325 let Yakutii	concentrates	0.66	10.11	54.47	22.4199	0.41		10.61	98.6799	4	0.0167749	0.402619	1.45519	0.633546	0.0117343	0	0.534456	3.05432		0.52495	-0.338747	0.0115256	0	0	0.0711388	0.714655	0.0164766	0.522364	0.77136	0.201042
81	325 let Yakutii	concentrates	0.16	10.8	54.96	21.3	0.38		10.57	98.17	4	0.00406572	0.429999	1.46795	0.60176	0.0108732	0	0.532319	3.04696		0.524114	-0.323134	0.0107056	0	0	0.0616511	0.72266	0.00400306	0.527651	0.79189	0.212537
85	325 let Yakutii	concentrates	0.09	12.09	55.12	20.55	0.4		10.82	99.07	4	0.0022466	0.472864	1.44623	0.570324	0.0112435	0	0.535291	3.0382		0.52856	-0.306203	0.0111021	0	0	0.0502985	0.714024	0.00221835	0.533298	0.821368	0.233978
110	325 let Yakutii	concentrates	0.87	5.59	55.2	27.4398	0.46		8.71	98.2698	4	0.0231695	0.233258	1.54519	0.812468	0.0137947	0	0.459722	3.08761		0.446678	-0.346762	0.0134033	0	0	0.113493	0.750675	0.0225121	0.442646	0.712464	0.11593
154	325 let Yakutii	concentrates	0.46	10.22	55.36	22.02	0.43		10.68	99.17	4	0.0116194	0.404485	1.46983	0.618399	0.0122307	0	0.534658	3.05122		0.525682	-0.33886	0.0120253	0	0	0.0671506	0.722578	0.0114243	0.525998	0.779116	0.201145
151	325 let Yakutii	concentrates	0.42	8.29	55.56	23.62	0.42		10.41	98.72	4	0.0108186	0.334583	1.50429	0.67644	0.0121823	0	0.531438	3.06975		0.519363	-0.367778	0.0119055	0	0	0.0908831	0.735054	0.0105728	0.520056	0.725043	0.165237
119	325 let Yakutii	concentrates	0.56	9.5	55.78	22.4	0.44		10.45	99.13	4	0.0142219	0.378023	1.48899	0.632475	0.0125828	0	0.525974	3.05227		0.516967	-0.343559	0.0123673	0	0	0.0684997	0.731747	0.0139783	0.516135	0.779618	0.188408
142	325 let Yakutii	concentrates	0.09	12.58	56.66	17.64	0.32		12.1	99.39	4	0.00220814	0.483606	1.46119	0.481181	0.00884077	0	0.588368	3.02539		0.58343	-0.352423	0.00876657	0	0	0.0335745	0.724463	0.00218961	0.587292	0.859268	0.240299
114	325 let Yakutii	concentrates	0.2	9.12	56.91	23.15	0.4		9.66	99.44	4	0.00509894	0.36431	1.52505	0.656186	0.0114833	0	0.488097	3.05022		0.48006	-0.312199	0.0112942	0	0	0.0658604	0.749969	0.00501498	0.483093	0.795902	0.180059
19	325 let Yakutii	concentrates	0.31	10.03	57.53	19.23	0.36		11.34	98.8	4	0.007791	0.394965	1.51975	0.537325	0.010188	0	0.564838	3.03485		0.558351	-0.373207	0.010071	0	0	0.0459371	0.751147	0.00770153	0.559677	0.827029	0.19673
82	325 let Yakutii	concentrates	0.18	10.03	57.61	19.14	0.36		11.4	98.72	4	0.00452708	0.395251	1.52296	0.535196	0.0101954	0	0.568237	3.03637		0.561431	-0.376246	0.0100733	0	0	0.0479088	0.75236	0.00447286	0.564593	0.818797	0.196136
156	325 let Yakutii	concentrates	0.02	10.46	57.63	20.0599	0.39		10.93	99.4899	4	0.000500343	0.410011	1.51542	0.557948	0.0109865	0	0.541923	3.03679		0.535358	-0.343689	0.0108534	0	0	0.0484534	0.74853	0.000494282	0.540962	0.824186	0.202623
80	325 let Yakutii	concentrates	0.17	12.92	57.89	15.4	0.32		12.46	99.16	4	0.00414244	0.493283	1.48271	0.41721	0.00878038	0	0.601734	3.00786		0.600162	-0.362922	0.00875743	0	0	0.0104535	0.739418	0.00413162	0.602951	0.949757	0.247018
144	325 let Yakutii	concentrates	0.41	9.47	58.01	19.9699	0.43		11.19	99.4799	4	0.0102884	0.37234	1.53007	0.557143	0.0121503	0	0.55651	3.0385		0.549458	-0.377643	0.0119964	0	0	0.0506893	0.755342	0.010158	0.55047	0.815703	0.185697
51	325 let Yakutii	concentrates	0.16	8.26	58.02	21.7699	0.46		9.95	98.6199	4	0.00411173	0.332591	1.56721	0.621997	0.0133112	0	0.506765	3.04599		0.499114	-0.348439	0.0131103	0	0	0.0603905	0.771775	0.00404965	0.503678	0.802841	0.164451
141	325 let Yakutii	concentrates	0.12	9.24	58.08	21.69	0.36		10.46	99.95	4	0.00302306	0.364724	1.53793	0.607508	0.0102123	0	0.522248	3.04565		0.51442	-0.344851	0.0100592	0	0	0.0599521	0.757442	0.00297775	0.518089	0.799626	0.180165
152	325 let Yakutii	concentrates	0.14	8.9	58.55	19.51	0.41		11.36	98.87	4	0.00354032	0.35264	1.55628	0.548527	0.0116749	0	0.569341	3.042		0.56148	-0.399108	0.0115137	0	0	0.0552279	0.767395	0.00349144	0.566021	0.795813	0.174495
14	325 let Yakutii	concentrates	0.26	8.86	59.59	19.6	0.45		10.34	99.1	4	0.00657866	0.351256	1.58483	0.551375	0.0128213	0	0.518518	3.02538		0.514168	-0.352727	0.0127138	0	0	0.0335539	0.785768	0.00652347	0.517371	0.87726	0.175298
90	325 let Yakutii	concentrates	0.2	9.12	60.06	16.9999	0.36		11.67	98.4099	4	0.00503262	0.359572	1.58853	0.475596	0.0102005	0	0.581988	3.02092		0.577959	-0.409548	0.0101299	0	0	0.0276966	0.788765	0.00499778	0.58094	0.882717	0.179438
157	325 let Yakutii	concentrates	0.51	5.48	60.76	20.2299	0.38		11.72	99.0799	4	0.01309	0.220382	1.6392	0.577285	0.0109827	0	0.596178	3.05712		0.585039	-0.487684	0.0107775	0	0	0.074735	0.804287	0.0128454	0.583832	0.736151	0.109539
149	325 let Yakutii	concentrates	0.03	7.2	61.25	16.8999	0.34		12.54	98.2599	4	0.000761532	0.286369	1.63425	0.476956	0.00971855	0	0.630875	3.03893		0.622794	-0.491038	0.00959405	0	0	0.0512409	0.806657	0.000751777	0.62835	0.782345	0.141456
147	325 let Yakutii	concentrates	0.28	5.32	62.26	18.88	0.37		11.79	98.9	4	0.0071795	0.213734	1.67799	0.538225	0.010683	0	0.599141	3.04696		0.589908	-0.495206	0.0105184	0	0	0.0616435	0.826067	0.00706885	0.591949	0.767352	0.105969
34	325 let Yakutii	concentrates	0.06	6.04	62.66	17.6399	0.35		12.17	98.9199	4	0.00152638	0.240755	1.67551	0.498925	0.0100262	0	0.613595	3.04034		0.605453	-0.496566	0.00989315	0	0	0.0530728	0.826641	0.00150613	0.610574	0.784391	0.118959
150	325 let Yakutii	concentrates	0.07	4.29	63.84	17.42	0.39		12	98.01	4	0.0018127	0.174065	1.73767	0.501537	0.0113723	0	0.615869	3.04232		0.607302	-0.532694	0.0112141	0	0	0.0556442	0.856747	0.00178748	0.613081	0.774975	0.0859755
86	325 let Yakutii	concentrates	0	4.7	64.24	17.1299	0.41		12.48	98.9599	4	0	0.188136	1.72504	0.486552	0.0117947	0	0.63189	3.04341		0.622877	-0.541777	0.0116265	0	0	0.0570575	0.850216	0	0.630204	0.762068	0.0927262
146	325 let Yakutii	concentrates	0.16	4.76	64.25	17.5	0.36		12.21	99.24	4	0.00407986	0.190177	1.72204	0.496123	0.0103367	0	0.61705	3.03981		0.608969	-0.525327	0.0102014	0	0	0.0523847	0.849746	0.00402643	0.612753	0.786021	0.0942227
138	325 let Yakutii	concentrates	0.03	4.86	64.55	17.4299	0.28		12.14	99.2899	4	0.000764286	0.193998	1.72853	0.493693	0.00803245	0	0.61296	3.03797		0.605298	-0.517444	0.00793205	0	0	0.0499987	0.85346	0.000754732	0.609674	0.794886	0.0958588
158	325 let Yakutii	concentrates	0.07	4.09	65.3	17.29	0.36		12.46	99.57	4	0.00178309	0.163239	1.74837	0.489661	0.010326	0	0.629031	3.04241		0.620262	-0.549963	0.0101821	0	0	0.0557608	0.861999	0.00175823	0.625532	0.769028	0.0806236
143	325 let Yakutii	concentrates	0.01	4.51	65.41	16.5899	0.32		12.15	98.9899	4	0.000255373	0.180459	1.75576	0.471027	0.00920197	0	0.614937	3.03164		0.608519	-0.528338	0.00910594	0	0	0.041742	0.868718	0.000252708	0.613955	0.820892	0.0893103
121	325 let Yakutii	concentrates	2.6	1.45	56.92	28.1198	0.48		8.85	98.4198	4	0.0704154	0.0615302	1.62033	0.846708	0.0146383	0	0.475025	3.08865		0.461391	-0.445727	0.0142182	0	0	0.11481	0.786914	0.0683943	0.437679	0.720794	0.0320759
122	325 let Yakutii	concentrates	2.34	1.06	57.83	27.5099	0.47		9.12	98.3299	4	0.0634409	0.0450283	1.64798	0.82922	0.0143485	0	0.490036	3.09005		0.475754	-0.467827	0.0139304	0	0	0.116573	0.799977	0.0615921	0.454111	0.710397	0.0232927
125	325 let Yakutii	concentrates	4.79	1.56	40.09	45.4897	0.41		6.08	98.4197	4	0.137307	0.070066	1.20792	1.44976	0.0132342	0	0.345413	3.2237		0.321444	-0.301158	0.0123158	0	0	0.27757	0.56205	0.127779	0.288171	0.588529	0.0373781
126	325 let Yakutii	concentrates	0.1	15.15	54.12	17.3799	0.35		12.36	99.4599	4	0.00241913	0.574247	1.37614	0.46745	0.00953419	0	0.592594	3.02239		0.588205	-0.312672	0.00946357	0	0	0.0296275	0.682974	0.00240122	0.592389	0.872292	0.285683
127	325 let Yakutii	concentrates	0.24	19.2	49.07	19.3001	0.32		11.48	99.6101	4	0.00572991	0.718231	1.2314	0.512297	0.00860285	0	0.543198	3.01946		0.539697	-0.191443	0.00854742	0	0	0.025774	0.611731	0.00569299	0.541242	0.898726	0.358844
130	325 let Yakutii	concentrates	0.21	10.11	58.61	17.44	0.39		11.98	98.74	4	0.00524473	0.395622	1.53858	0.484257	0.0109679	0	0.592979	3.02765		0.587563	-0.402426	0.0108677	0	0	0.0365342	0.762265	0.00519682	0.590914	0.847722	0.197028
131	325 let Yakutii	concentrates	4.04	1.67	50.06	34.3698	0.48		8.22	98.8398	4	0.110703	0.0717002	1.44183	1.04708	0.0148107	0	0.446405	3.13253		0.427518	-0.407369	0.0141841	0	0	0.169233	0.690414	0.106019	0.391559	0.662473	0.038405
132	325 let Yakutii	concentrates	2.46	1.43	57.55	28.5399	0.49		9.27	99.7399	4	0.0657438	0.05988	1.61663	0.848005	0.0147459	0	0.490997	3.096		0.475772	-0.461049	0.0142887	0	0	0.124033	0.783251	0.0637052	0.453368	0.698111	0.0309856
133	325 let Yakutii	concentrates	3.5	1.72	51.04	33.2898	0.42		8.39	98.3598	4	0.0961357	0.0740238	1.47358	1.01661	0.0129904	0	0.456728	3.13006		0.437749	-0.414726	0.0124506	0	0	0.166213	0.706172	0.0921409	0.40544	0.658829	0.0390742
134	325 let Yakutii	concentrates	3.98	1.73	48.86	34.6599	0.45		8.5	98.1799	4	0.109832	0.0748027	1.41724	1.0634	0.0139834	0	0.464882	3.14415		0.443569	-0.421225	0.0133423	0	0	0.183383	0.676133	0.104796	0.406402	0.638529	0.0398643
136	325 let Yakutii	concentrates	0.82	6.8	59.87	18.2499	0.37		12.83	98.9399	4	0.0207397	0.269478	1.59164	0.513188	0.0105377	0	0.643124	3.0487		0.63285	-0.510633	0.0103694	0	0	0.0639005	0.783104	0.0204084	0.62656	0.746924	0.135349
137	325 let Yakutii	concentrates	0.61	16.43	47.77	19.7999	0.3		14.04	98.9499	4	0.0147585	0.622838	1.21482	0.532601	0.00817313	0	0.673221	3.06641		0.65864	-0.361962	0.00799612	0	0	0.0866318	0.594255	0.0144388	0.654424	0.667482	0.309138
38	325 let Yakutii	concentrates	2.28	1.55	57.81	27.7799	0.5		9.35	99.2699	4	0.0610733	0.0650541	1.62766	0.827321	0.0150814	0	0.496372	3.09257		0.481515	-0.464591	0.01463	0	0	0.119729	0.789473	0.0592453	0.460949	0.701632	0.0335406
53	325 let Yakutii	concentrates	2.53	1.34	57.41	28.0299	0.51		9.42	99.2399	4	0.0678592	0.0563143	1.61853	0.835865	0.0154033	0	0.500746	3.09472		0.48542	-0.473057	0.0149319	0	0	0.122426	0.784496	0.0657822	0.461931	0.697819	0.0292174
51	325 let Yakutii	concentrates	2.67	1.73	54.42	31.3398	0.48		7.74	98.3798	4	0.073185	0.0742991	1.56789	0.955068	0.0148152	0	0.420466	3.10572		0.406153	-0.384579	0.0143109	0	0	0.136163	0.757258	0.0706938	0.384475	0.704813	0.0386148
36	325 let Yakutii	concentrates	2.77	1.55	54.57	32.0398	0.52		8.09	99.5398	4	0.0751381	0.0658777	1.55589	0.966267	0.0158832	0	0.434918	3.11398		0.419	-0.402568	0.0153019	0	0	0.146407	0.749472	0.0723879	0.396372	0.685451	0.0342096
34	325 let Yakutii	concentrates	2.85	1.61	50.84	36.8398	0.44		6.76	99.3398	4	0.0788968	0.069834	1.47933	1.13386	0.0137159	0	0.370886	3.14652		0.353615	-0.333401	0.0130772	0	0	0.186263	0.705223	0.0752229	0.332925	0.655405	0.035999
40	325 let Yakutii	concentrates	3.17	1.66	53.25	31.3799	0.47		9.24	99.1699	4	0.0857172	0.0703304	1.51347	0.943379	0.0143107	0	0.495176	3.12238		0.475768	-0.455731	0.0137498	0	0	0.156781	0.727074	0.0823575	0.445222	0.654058	0.0368192
44	325 let Yakutii	concentrates	3.68	1.92	50.02	34.8798	0.48		8.34	99.3198	4	0.100419	0.0820911	1.43469	1.0582	0.0147491	0	0.451039	3.14119		0.430765	-0.405651	0.0140862	0	0	0.179793	0.685101	0.0959055	0.398186	0.6442	0.043359
43	325 let Yakutii	concentrates	3.87	1.64	48.38	37.4998	0.51		7.7	99.5998	4	0.106465	0.0706912	1.39896	1.14697	0.0157987	0	0.419822	3.15871		0.398728	-0.380163	0.0150049	0	0	0.200978	0.664337	0.101116	0.367116	0.631009	0.0373459
31	325 let Yakutii	concentrates	4.31	1.68	42.47	42.8098	0.46		6.35	98.0798	4	0.122943	0.0750864	1.27337	1.35767	0.0147754	0	0.358987	3.20283		0.336253	-0.314927	0.0138397	0	0	0.253315	0.596363	0.115157	0.305319	0.601611	0.0397422
49	325 let Yakutii	concentrates	5.16	1.47	36.32	49.6297	0.35		6.03	98.9597	4	0.148958	0.0664904	1.10206	1.59288	0.0113773	0	0.344994	3.26676		0.316822	-0.29674	0.0104482	0	0	0.326641	0.506034	0.136794	0.281283	0.553405	0.0353686
45	325 let Yakutii	concentrates	54.48	0.68	3.75	27.33	0.22		14.84	101.3	4	1.23457	0.0241442	0.0893213	0.688564	0.00561379	0	0.666486	2.7087		0.738162	-0.731009	0.00621752	0	0	-0.430172	0.0494636	1.36734	0.312632	2.12815	-0.036398
54	325 let Yakutii	concentrates	1.08	4.84	54.87	28.3199	0.52		9.82	99.4499	4	0.0284998	0.20012	1.52194	0.830875	0.0154517	0	0.51358	3.11047		0.495341	-0.413737	0.014903	0	0	0.142061	0.733945	0.0274876	0.489184	0.645453	0.0992338
52	325 let Yakutii	concentrates	0.78	10.03	55.86	20.8199	0.44		11.28	99.2099	4	0.0195975	0.394851	1.47521	0.581583	0.0124484	0	0.561687	3.04537		0.553319	-0.371097	0.012263	0	0	0.0595968	0.726614	0.0193055	0.549449	0.791953	0.198313
41	325 let Yakutii	concentrates	0.19	15.79	53.49	16.2399	0.36		13.16	99.2299	4	0.00456817	0.594836	1.35178	0.434109	0.00974646	0	0.627081	3.02212		0.622491	-0.336925	0.00967511	0	0	0.0292811	0.670943	0.00453473	0.625707	0.864103	0.296586
37	325 let Yakutii	concentrates	0.08	12.84	54.44	18.8399	0.36		12.5	99.0599	4	0.00197171	0.495843	1.41032	0.516248	0.00999105	0	0.610579	3.04495		0.601566	-0.367148	0.00984356	0	0	0.059047	0.694749	0.0019426	0.606357	0.767818	0.244737
39	325 let Yakutii	concentrates	0.03	4.78	65.23	16.97	0.37		12.05	99.43	4	0.000762849	0.190446	1.74345	0.479761	0.0105944	0	0.607272	3.03229		0.600806	-0.517078	0.0104815	0	0	0.0425927	0.862444	0.000754726	0.606707	0.820531	0.0942801
259	Legkaya	concentrates	0	23.63	14.9	45.0795	0.28		14.56	98.4495	4	0	0.935436	0.395691	1.26628	0.00796596	0	0.729063	3.33444		0.655939	-0.242299	0.00716699	0	0	0.401191	0.178002	0	0.660674	0.295709	0.420807
252	Legkaya	concentrates	0.03	11.08	20.54	55.3794	0.38		11.18	98.5894	4	0.000841269	0.486832	0.605424	1.72659	0.0119992	0	0.621347	3.45303		0.539828	-0.338772	0.0104249	0	0	0.524792	0.262997	0.000730896	0.545112	0.300306	0.211635
248	Legkaya	concentrates	0.06	4.36	17.71	63.1793	0.33		12.57	98.2093	4	0.0017935	0.204204	0.556435	2.09968	0.0111076	0	0.744672	3.61789		0.617492	-0.542038	0.00921057	0	0	0.683147	0.230702	0.0014872	0.622298	0.21526	0.0847903
234	Legkaya	concentrates	0.07	16.59	16.61	49.4295	0.3		15.28	98.2795	4	0.00185558	0.689057	0.462804	1.45678	0.00895487	0	0.802758	3.42221		0.703718	-0.409546	0.00785007	0	0	0.493498	0.202853	0.00162665	0.708125	0.227131	0.302514
246	Legkaya	concentrates	0.08	10.56	18.73	56.5494	0.37		11.97	98.2594	4	0.00226115	0.467659	0.556445	1.77703	0.011776	0	0.670521	3.48569		0.577092	-0.385979	0.0101351	0	0	0.55735	0.239456	0.00194608	0.581857	0.271161	0.201641
263	Legkaya	concentrates	0.1	11.35	21.35	53.6195	0.4		11.62	98.4395	4	0.00278491	0.49526	0.624963	1.6602	0.0125437	0	0.641352	3.4371		0.55979	-0.3546	0.0109485	0	0	0.508688	0.272743	0.00243075	0.564599	0.29791	0.216665
219	Legkaya	concentrates	0.1	19.22	16.67	47.5395	0.32		14.6	98.4495	4	0.00260069	0.783192	0.45569	1.37458	0.00937118	0	0.752524	3.37796		0.668325	-0.328867	0.00832264	0	0	0.447558	0.202352	0.0023097	0.672368	0.266766	0.348586
217	Legkaya	concentrates	0.11	17.3	17.91	50.0095	0.32		13.35	98.9995	4	0.00290359	0.715508	0.496916	1.46765	0.00951148	0	0.698398	3.39088		0.61789	-0.309791	0.00841504	0	0	0.4611	0.219817	0.00256888	0.621523	0.289776	0.317329
209	Legkaya	concentrates	0.11	4.92	19.27	61.6294	0.39		12.17	98.4894	4	0.00325339	0.228	0.59906	2.02655	0.0129886	0	0.713366	3.58322		0.597256	-0.512686	0.0108746	0	0	0.651054	0.250777	0.00272385	0.602164	0.232565	0.0957055
237	Legkaya	concentrates	0.11	5.85	16.23	63.0793	0.34		12.77	98.3793	4	0.00325008	0.270822	0.50404	2.07212	0.0113119	0	0.747776	3.60932		0.621538	-0.518389	0.00940225	0	0	0.675273	0.209475	0.00270141	0.625731	0.215851	0.112856
257	Legkaya	concentrates	0.16	13.62	17.73	54.3095	0.36		12.05	98.2295	4	0.00441522	0.588892	0.514264	1.66623	0.0111864	0	0.65902	3.44401		0.574058	-0.327317	0.00974424	0	0	0.515686	0.223982	0.003846	0.577464	0.289403	0.257476
230	Legkaya	concentrates	0.19	17.94	23.25	44.6397	0.43		12.06	98.5097	4	0.00496028	0.73384	0.638	1.29569	0.0126409	0	0.623992	3.30912		0.565702	-0.244518	0.01146	0	0	0.373658	0.289201	0.00449692	0.569669	0.363797	0.334147
260	Legkaya	concentrates	0.19	10.82	21.35	53.6495	0.42		11.61	98.0395	4	0.00532953	0.475542	0.629475	1.67312	0.013266	0	0.645426	3.44216		0.562518	-0.366852	0.0115619	0	0	0.513819	0.274308	0.00464493	0.566436	0.295271	0.208195
211	Legkaya	concentrates	0.2	9.93	22.92	53.8594	0.44		11.27	98.6194	4	0.0056106	0.43647	0.675832	1.67984	0.0138991	0	0.626588	3.43824		0.546723	-0.368432	0.0121275	0	0	0.50984	0.294845	0.00489547	0.550706	0.304317	0.191356
222	Legkaya	concentrates	0.3	23.61	16.27	41.3895	0.25		17	98.8195	4	0.00741966	0.914924	0.422956	1.1381	0.00696239	0	0.83328	3.32364		0.752139	-0.345507	0.00628443	0	0	0.389501	0.190885	0.00669717	0.751828	0.241682	0.4157
253	Legkaya	concentrates	0.33	5.19	19.1	61.4093	0.38		12.03	98.4393	4	0.00974048	0.240027	0.592578	2.01524	0.0126301	0	0.703738	3.57396		0.590722	-0.500584	0.0106018	0	0	0.642377	0.248707	0.00817622	0.592158	0.240512	0.10157
239	Legkaya	concentrates	0.4	17.97	29.53	37.5697	0.33		12.24	98.0397	4	0.0102569	0.721988	0.795911	1.07107	0.00952851	0	0.622037	3.23079		0.577601	-0.251243	0.00884784	0	0	0.285743	0.369527	0.00952418	0.577211	0.425389	0.338429
244	Legkaya	concentrates	0.46	7.67	34.63	46.2396	0.33		8.57	97.8996	4	0.0129294	0.337785	1.0231	1.44498	0.0104445	0	0.477397	3.30663		0.433127	-0.289372	0.00947599	0	0	0.370926	0.464112	0.0117304	0.432153	0.434124	0.15505
214	Legkaya	concentrates	0.88	11.22	20.37	54.4495	0.37		11.69	98.9795	4	0.0243821	0.487088	0.593232	1.67729	0.0115437	0	0.641921	3.43546		0.560555	-0.357962	0.0100805	0	0	0.507016	0.259019	0.0212916	0.55434	0.30768	0.2173
220	Legkaya	concentrates	1.05	7.4	17.77	58.0994	0.36		13.82	98.4994	4	0.0300216	0.331515	0.534045	1.8469	0.0115905	0	0.783127	3.5372		0.664193	-0.533439	0.00983026	0	0	0.607485	0.22647	0.0254622	0.65397	0.22436	0.144257
218	Legkaya	concentrates	1.43	6.68	32.14	48.2697	0.45		9.16	98.1297	4	0.0404068	0.295747	0.954573	1.51642	0.0143181	0	0.512971	3.33443		0.461521	-0.341361	0.0128821	0	0	0.401187	0.429416	0.0363541	0.450937	0.411889	0.138061
264	Legkaya	concentrates	1.56	6.49	20.93	56.6494	0.36		12.54	98.5294	4	0.0446948	0.291342	0.630299	1.80449	0.0116142	0	0.712047	3.49448		0.611289	-0.496202	0.00997076	0	0	0.566017	0.270555	0.0383703	0.594408	0.269252	0.130048
210	Legkaya	concentrates	1.59	8.73	19.1	56.1894	0.37		12.89	98.8694	4	0.0447111	0.384644	0.564543	1.75671	0.0117159	0	0.718374	3.4807		0.619164	-0.4635	0.0100979	0	0	0.552413	0.243289	0.0385364	0.602043	0.270309	0.172406
266	Legkaya	concentrates	1.62	5.97	21.49	56.7495	0.38		12.18	98.3895	4	0.0466809	0.269541	0.650888	1.81808	0.01233	0	0.695586	3.4931		0.597393	-0.492237	0.0105894	0	0	0.564661	0.279503	0.0400912	0.580274	0.276739	0.12058
226	Legkaya	concentrates	1.79	6.05	20.45	57.2194	0.39		12.71	98.6094	4	0.0514046	0.272227	0.617288	1.82692	0.0126116	0	0.723392	3.50384		0.619371	-0.513628	0.0107981	0	0	0.575184	0.264262	0.0440128	0.59946	0.26457	0.121906
247	Legkaya	concentrates	2.22	25.66	15.22	38.0596	0.27		17.42	98.8496	4	0.0535302	0.969457	0.38575	1.02032	0.00733103	0	0.832478	3.26887		0.764006	-0.325875	0.00672805	0	0	0.329003	0.177011	0.0491273	0.732931	0.297302	0.467843
236	Legkaya	concentrates	2.49	7.76	32.83	44.9596	0.47		9.56	98.0696	4	0.0689551	0.336709	0.955615	1.38426	0.0146562	0	0.524691	3.28488		0.479187	-0.338818	0.0133851	0	0	0.346902	0.43637	0.0629749	0.456547	0.451194	0.164087
224	Legkaya	concentrates	2.66	1.56	28.3	55.5294	0.42		9.92	98.3894	4	0.0785375	0.0721683	0.878269	1.82283	0.0139637	0	0.580479	3.44624		0.505314	-0.486058	0.0121556	0	0	0.517948	0.382272	0.0683679	0.478421	0.347177	0.0337169
221	Legkaya	concentrates	2.89	6.76	21.18	54.0195	0.39		13.06	98.2995	4	0.0817291	0.299538	0.629579	1.69846	0.0124194	0	0.731983	3.45371		0.635823	-0.516517	0.0107878	0	0	0.525478	0.273436	0.0709924	0.599717	0.28765	0.140035
235	Legkaya	concentrates	3.17	6.56	17.11	55.4394	0.35		14.95	97.5794	4	0.0903165	0.292845	0.512393	1.75612	0.0112288	0	0.844166	3.50706		0.722114	-0.606467	0.00960526	0	0	0.578335	0.219155	0.0772582	0.676356	0.230021	0.135739
250	Legkaya	concentrates	3.19	7.72	18.77	53.9895	0.35		14.62	98.6395	4	0.088912	0.337142	0.549894	1.67304	0.0109848	0	0.8076	3.46757		0.698702	-0.562365	0.00950363	0	0	0.539363	0.237873	0.076923	0.654572	0.254737	0.157994
241	Legkaya	concentrates	3.47	5.06	19.62	56.6794	0.39		13.96	99.1794	4	0.0985174	0.225092	0.585501	1.7891	0.0124682	0	0.785503	3.49619		0.674023	-0.588149	0.0106987	0	0	0.567688	0.251203	0.0845356	0.627677	0.260433	0.105491
254	Legkaya	concentrates	3.49	6.35	22.65	52.5195	0.34		12.8	98.1495	4	0.0984779	0.280746	0.67178	1.64763	0.0108031	0	0.715818	3.42526		0.626946	-0.513463	0.00946185	0	0	0.496615	0.294188	0.0862515	0.582237	0.311726	0.13455
225	Legkaya	concentrates	3.51	5.13	22.39	54.5195	0.36		12.85	98.7595	4	0.0996695	0.228244	0.668274	1.72121	0.011511	0	0.723165	3.45207		0.628462	-0.539289	0.0100036	0	0	0.523826	0.29038	0.0866171	0.583739	0.299606	0.108582
232	Legkaya	concentrates	4.11	9.4	33.55	40.0297	0.41		10.91	98.4097	4	0.109747	0.393285	0.941653	1.1884	0.012328	0	0.577373	3.22278		0.537461	-0.365888	0.0114758	0	0	0.276511	0.438279	0.102161	0.492773	0.500091	0.203877
223	Legkaya	concentrates	4.15	4.41	35.12	45.4796	0.38		8.89	98.4296	4	0.11637	0.193758	1.03513	1.41788	0.0119987	0	0.494055	3.26919		0.453374	-0.375483	0.0110107	0	0	0.329362	0.474948	0.106788	0.413747	0.493728	0.0995306
158	Poiskovaya	concentrates	0.01	12.09	55.46	15.87	0.3		14.49	98.22	4	0.000246039	0.466076	1.43427	0.434117	0.00831154	0	0.706565	3.04958		0.695077	-0.474004	0.0081764	0	0	0.0650352	0.705474	0.000242039	0.700636	0.695428	0.229305
146	Poiskovaya	concentrates	0.05	17.83	48.52	16.23	0.31		15.52	98.46	4	0.00119291	0.666524	1.21676	0.430509	0.00832828	0	0.733853	3.05717		0.720131	-0.401273	0.00817255	0	0	0.0747959	0.597003	0.00117061	0.725208	0.645902	0.327414
153	Poiskovaya	concentrates	0.2	21.43	47.04	16.83	0.28		13.24	99.02	4	0.00470038	0.789134	1.16202	0.439757	0.00740997	0	0.616694	3.01972		0.612667	-0.228038	0.00736158	0	0	0.026122	0.577218	0.00466968	0.61432	0.880417	0.393829
176	Poiskovaya	concentrates	0.3	23.18	38.6	19.4099	0.27		16.9	98.6599	4	0.0070046	0.848012	0.947316	0.503862	0.00709875	0	0.782038	3.09533		0.757953	-0.353886	0.00688012	0	0	0.123194	0.45907	0.00678887	0.758022	0.495463	0.413756
165	Poiskovaya	concentrates	0.32	22.72	39.09	19.5398	0.27		16.69	98.6298	4	0.00749521	0.833813	0.962377	0.50884	0.00712121	0	0.774764	3.09441		0.751126	-0.353843	0.00690394	0	0	0.122039	0.466507	0.00726654	0.750854	0.505228	0.407145
175	Poiskovaya	concentrates	0.43	10.89	47.85	27.9899	0.35		11.23	98.7399	4	0.0110492	0.438447	1.29238	0.799632	0.0101271	0	0.571902	3.12354		0.549283	-0.348457	0.0097266	0	0	0.158202	0.620633	0.0106122	0.548797	0.588019	0.212811
185	Poiskovaya	concentrates	2.85	1.71	54.04	30.4299	0.44		8.91	98.3799	4	0.0775999	0.0729522	1.5466	0.921178	0.0134904	0	0.480809	3.11263		0.463412	-0.441258	0.0130023	0	0	0.144734	0.745317	0.074792	0.436444	0.673965	0.0379982
144	Poiskovaya	concentrates	3.19	4.51	57.25	20.4499	0.4		13.14	98.9399	4	0.0815482	0.180645	1.53831	0.581222	0.0115144	0	0.66573	3.05897		0.652896	-0.575607	0.0112924	0	0	0.0771145	0.754328	0.0799761	0.610935	0.729431	0.0962815
154	Poiskovaya	concentrates	3.88	4.78	46.05	34.2098	0.38		9.32	98.6198	4	0.104489	0.201693	1.3035	1.02427	0.0115233	0	0.497431	3.14291		0.474812	-0.38955	0.0109993	0	0	0.181885	0.622116	0.0997375	0.436112	0.627931	0.106926
156	Poiskovaya	concentrates	4.36	5.75	51.09	23.7199	0.35		13.67	98.9399	4	0.111336	0.23006	1.37129	0.673421	0.010064	0	0.691823	3.08799		0.67211	-0.570135	0.00977724	0	0	0.113978	0.666107	0.108163	0.611907	0.651567	0.125306
149	Poiskovaya	concentrates	4.41	9.59	39.72	33.2798	0.37		11.28	98.6498	4	0.114727	0.390905	1.08613	0.962573	0.0108389	0	0.581586	3.14676		0.554463	-0.378459	0.0103334	0	0	0.18655	0.517736	0.109376	0.504496	0.593431	0.209221
162	Poiskovaya	concentrates	4.47	7.46	48.26	23.9599	0.31		13.79	98.2499	4	0.113972	0.298028	1.29337	0.679208	0.00890039	0	0.696843	3.09033		0.676475	-0.540457	0.00864024	0	0	0.116915	0.627785	0.110641	0.613861	0.645365	0.162655
104	Poiskovaya	concentrates	0.01	13.57	55.04	15.8899	0.36		13.23	98.0999	4	0.000245422	0.521819	1.41984	0.433572	0.00994884	0	0.643507	3.02893		0.637361	-0.388797	0.00985382	0	0	0.0382016	0.703138	0.000243078	0.643546	0.822083	0.258481
74	Poiskovaya	concentrates	0.01	26.36	35.91	19.69	0.29		16.13	98.39	4	0.000231513	0.956196	0.873849	0.506812	0.00756013	0	0.740097	3.08475		0.719765	-0.262154	0.00735243	0	0	0.10989	0.424921	0.000225153	0.724932	0.554096	0.465068
136	Poiskovaya	concentrates	0.02	5.71	62.37	17.4099	0.34		12.13	97.9799	4	0.00051422	0.230028	1.68554	0.497671	0.00984359	0	0.6181	3.0417		0.609626	-0.505897	0.00970864	0	0	0.0548378	0.831218	0.00050717	0.615288	0.776559	0.113495
97	Poiskovaya	concentrates	0.03	14.28	55.31	14.9499	0.31		14.16	99.0399	4	0.000723499	0.539599	1.40206	0.400851	0.00841849	0	0.676798	3.02845		0.670441	-0.411515	0.00833941	0	0	0.0375743	0.694444	0.000716703	0.675591	0.81075	0.267457
109	Poiskovaya	concentrates	0.05	11	57.6	17.2499	0.38		12.18	98.4599	4	0.001246	0.429503	1.50874	0.477925	0.0106632	0	0.601552	3.02963		0.595669	-0.393577	0.0105589	0	0	0.0391224	0.746993	0.00123381	0.601276	0.834665	0.212914
106	Poiskovaya	concentrates	0.05	5.8	63.12	15.9199	0.31		13.42	98.6199	4	0.00126666	0.23022	1.68075	0.448391	0.00884315	0	0.673785	3.04325		0.664209	-0.559452	0.00871747	0	0	0.0568479	0.828429	0.00124866	0.669207	0.74278	0.113616
132	Poiskovaya	concentrates	0.06	32.64	26.59	24.0698	0.26		15.2	98.8198	4	0.00136415	1.16275	0.635438	0.608428	0.00665639	0	0.684908	3.09954		0.662912	-0.106651	0.00644261	0	0	0.128461	0.307515	0.00132034	0.666325	0.563717	0.563447
75	Poiskovaya	concentrates	0.1	13.87	52.46	19.0899	0.32		13.04	98.8799	4	0.00245492	0.533508	1.35367	0.521036	0.00884594	0	0.634446	3.05396		0.623237	-0.369886	0.00868965	0	0	0.0706724	0.664875	0.00241155	0.627174	0.723844	0.262674
111	Poiskovaya	concentrates	0.11	25	43.45	14.59	0.26		14.89	98.3	4	0.00253593	0.903047	1.05288	0.373961	0.00674952	0	0.680327	3.0195		0.675933	-0.234032	0.00670593	0	0	0.0258326	0.523041	0.00251955	0.678775	0.860945	0.44974
115	Poiskovaya	concentrates	0.16	30.96	30.72	21.9299	0.22		14.97	98.9599	4	0.00364014	1.10363	0.734623	0.554704	0.00563607	0	0.674993	3.07723		0.658052	-0.125579	0.00549462	0	0	0.10039	0.358093	0.00354878	0.659335	0.628723	0.539884
107	Poiskovaya	concentrates	0.16	29.28	32.82	20.9799	0.27		14.83	98.3399	4	0.00368022	1.05524	0.793484	0.536517	0.00699316	0	0.676043	3.07196		0.660207	-0.151776	0.00682935	0	0	0.0936962	0.387449	0.00359402	0.66235	0.642346	0.51712
93	Poiskovaya	concentrates	0.23	21.31	31.06	31.7597	0.29		13.08	97.7297	4	0.00571162	0.829165	0.810734	0.876868	0.00810933	0	0.643751	3.17434		0.608396	-0.224247	0.00766395	0	0	0.219686	0.383103	0.00539793	0.609777	0.469813	0.393939
102	Poiskovaya	concentrates	0.29	24.98	30.89	27.0498	0.26		14.65	98.1198	4	0.00692976	0.935274	0.77586	0.718639	0.00699599	0	0.693804	3.1375		0.663398	-0.222945	0.00668939	0	0	0.175303	0.370929	0.00662606	0.66344	0.489765	0.450125
68	Poiskovaya	concentrates	0.34	23.32	38.43	19.1499	0.25		16.83	98.3199	4	0.00795291	0.854676	0.94485	0.498013	0.0065848	0	0.780208	3.09228		0.756923	-0.348727	0.00638829	0	0	0.119373	0.458326	0.00771556	0.75592	0.505854	0.417809
69	Poiskovaya	concentrates	0.36	21.48	39.95	19.5798	0.26		16.62	98.2498	4	0.00851106	0.795685	0.992757	0.514655	0.00692166	0	0.778737	3.09727		0.754282	-0.375637	0.00670429	0	0	0.125617	0.48079	0.00824377	0.753122	0.496011	0.388552
112	Poiskovaya	concentrates	0.37	21.29	40.89	19.6999	0.24		16.13	98.6199	4	0.00873739	0.787738	1.01494	0.517214	0.00638185	0	0.754907	3.08992		0.732938	-0.356727	0.00619613	0	0	0.116406	0.492704	0.00848311	0.731265	0.53638	0.385678
113	Poiskovaya	concentrates	0.39	20.99	39.96	19.8898	0.27		16.42	97.9198	4	0.00928155	0.782699	0.999601	0.526275	0.00723561	0	0.774476	3.09957		0.749598	-0.377823	0.00700318	0	0	0.128493	0.483745	0.0089834	0.748116	0.49548	0.382211
101	Poiskovaya	concentrates	0.51	6.59	58.59	19.38	0.36		12.45	97.88	4	0.013118	0.265589	1.58405	0.554215	0.0104269	0	0.634669	3.06206		0.621805	-0.501918	0.0102156	0	0	0.0810752	0.77597	0.0128522	0.62017	0.70137	0.131797
117	Poiskovaya	concentrates	0.51	24.22	42.55	17.2199	0.31		14.29	99.0999	4	0.0118024	0.878218	1.03502	0.443057	0.00807829	0	0.65541	3.03158		0.648583	-0.222042	0.00799413	0	0	0.0416693	0.512117	0.0116795	0.646201	0.809921	0.43967
57	Poiskovaya	concentrates	0.56	17.6	46.4	17.9499	0.3		15.65	98.4599	4	0.013417	0.660702	1.1685	0.47814	0.00809364	0	0.743122	3.07198		0.72571	-0.411004	0.007904	0	0	0.0937244	0.570562	0.0131026	0.721957	0.598557	0.326894
128	Poiskovaya	concentrates	0.57	18.48	41.2	22.9698	0.25		15.17	98.6398	4	0.0137835	0.700183	1.04719	0.617543	0.00680736	0	0.727022	3.11253		0.700738	-0.369865	0.00656125	0	0	0.144615	0.504665	0.0132851	0.696058	0.514075	0.341977
95	Poiskovaya	concentrates	0.74	7.46	53.29	25.7999	0.36		10.61	98.2599	4	0.0193274	0.305286	1.46296	0.74918	0.0105877	0	0.549207	3.09655		0.532083	-0.394457	0.0102575	0	0	0.124718	0.708673	0.0187248	0.527616	0.656339	0.150706
78	Poiskovaya	concentrates	0.8	7.9	51.98	24.1299	0.34		12.66	97.8099	4	0.0207223	0.320628	1.41524	0.694913	0.00991707	0	0.649922	3.11134		0.626664	-0.481649	0.00956217	0	0	0.143145	0.682297	0.0199808	0.620202	0.57273	0.157729
64	Poiskovaya	concentrates	0.9	21.38	38.67	22.8199	0.33		14.57	98.6699	4	0.021475	0.799327	0.969862	0.605383	0.00886666	0	0.689016	3.09393		0.668098	-0.289165	0.00859748	0	0	0.121438	0.470209	0.020823	0.660028	0.586244	0.395771
96	Poiskovaya	concentrates	0.94	5.07	59.94	19.27	0.39		12.76	98.37	4	0.0241874	0.204407	1.62115	0.551275	0.0113001	0	0.650715	3.06303		0.637324	-0.548291	0.0110675	0	0	0.0823161	0.793894	0.0236896	0.62938	0.695086	0.102529
82	Poiskovaya	concentrates	1.04	5.27	59.77	18.4299	0.33		12.35	97.1899	4	0.0270058	0.214418	1.63137	0.532076	0.00964925	0	0.63558	3.0501		0.62514	-0.529183	0.00949076	0	0	0.0657025	0.802287	0.0265622	0.614647	0.748909	0.108325
81	Poiskovaya	concentrates	1.26	20.24	39.43	20.8998	0.24		15.99	98.0598	4	0.0300978	0.757532	0.990003	0.555052	0.00645552	0	0.756993	3.09613		0.733489	-0.372738	0.00625508	0	0	0.124199	0.479632	0.0291633	0.717062	0.538136	0.37803
72	Poiskovaya	concentrates	1.66	4.48	61.61	18.27	0.38		12.54	98.94	4	0.0424064	0.179319	1.65432	0.518904	0.0109311	0	0.634892	3.04077		0.626379	-0.548706	0.0107845	0	0	0.0536357	0.816069	0.0418378	0.607513	0.790463	0.0923199
140	Poiskovaya	concentrates	1.93	5.88	55.88	22.0099	0.39		12.26	98.3499	4	0.0498094	0.23777	1.51585	0.631536	0.0113338	0	0.627081	3.07338		0.612109	-0.507125	0.0110632	0	0	0.0955047	0.739828	0.0486202	0.589952	0.69015	0.121977
94	Poiskovaya	concentrates	2.18	11.51	42	30.4499	0.44		11.37	97.9499	4	0.0564347	0.466865	1.14284	0.876399	0.0128262	0	0.58335	3.13871		0.55757	-0.346713	0.0122594	0	0	0.176778	0.546165	0.0539406	0.535259	0.577928	0.235837
118	Poiskovaya	concentrates	2.25	7.69	53.49	20.7599	0.32		13.39	97.8999	4	0.057366	0.307202	1.43347	0.588468	0.00918708	0	0.676599	3.0723		0.660678	-0.519662	0.00897089	0	0	0.0941263	0.699871	0.0560161	0.630993	0.672388	0.158887
133	Poiskovaya	concentrates	2.46	5.7	56.18	20.1599	0.36		13.01	97.8699	4	0.0632812	0.229742	1.51903	0.576573	0.0104279	0	0.663278	3.06233		0.649777	-0.54746	0.0102157	0	0	0.0814187	0.744055	0.0619931	0.61779	0.711709	0.11997
79	Poiskovaya	concentrates	2.6	7.62	49.41	28.0899	0.33		11.13	99.1799	4	0.0672391	0.308766	1.3431	0.807653	0.00960989	0	0.570457	3.10683		0.550842	-0.411047	0.00927946	0	0	0.137538	0.64846	0.0649271	0.521805	0.647285	0.159426
80	Poiskovaya	concentrates	3.56	5.18	50.45	27.3599	0.33		10.64	97.5199	4	0.0944835	0.215408	1.40738	0.807321	0.00986224	0	0.559663	3.09412		0.542638	-0.447773	0.00956223	0	0	0.121677	0.682286	0.0916093	0.501492	0.689109	0.114959
129	Poiskovaya	concentrates	3.9	6.79	48.52	27.8399	0.37		11.51	98.9299	4	0.101011	0.275551	1.3209	0.801678	0.010791	0	0.590826	3.10076		0.571627	-0.448769	0.0104404	0	0	0.129983	0.63899	0.0977289	0.525736	0.664832	0.147736
66	Poiskovaya	concentrates	4.26	5.62	51.01	24.1799	0.37		13.33	98.7699	4	0.10932	0.225972	1.37592	0.689879	0.0106918	0	0.677955	3.08974		0.658265	-0.558942	0.0103812	0	0	0.116172	0.667978	0.106145	0.600736	0.653137	0.122732
122	Poiskovaya	concentrates	5.43	11.85	41.16	24.3099	0.32		14.69	97.7599	4	0.135659	0.463865	1.08086	0.675238	0.00900229	0	0.727358	3.09198		0.705721	-0.489422	0.00873449	0	0	0.118992	0.524352	0.131623	0.628487	0.63675	0.259142

## Sheet: Mg-ilmenite
Composition of Mg-ilmenite macrocrysts from the Upper Muna field, wt%.
№	Pipe	TiO2	Al2O3	Cr2O3	Fe2O3	FeO	MnO	MgO	Total
1	Zapolyarnaya	42.26	0.47	0.82	20.92	25.57	0.18	6.87	97.1
2	Zapolyarnaya	42.23	0.47	0.86	21.85	25.54	0.17	6.88	98
3	Zapolyarnaya	43.3	0.44	0.89	19.63	26.54	0.17	6.86	97.83
4	Zapolyarnaya	42.47	0.43	0.85	22.04	25.52	0.18	7.04	98.58
5	Zapolyarnaya	50.71	0.64	3.67	8.27	18.85	0.26	14.87	97.29
6	Zapolyarnaya	44.26	0.53	0.81	19.4	25.35	0.19	8	98.53
7	Zapolyarnaya	50.56	0.68	4	7.96	19.52	0.2	14.47	97.43
8	Zapolyarnaya	43.65	0.52	0.83	20.07	26.34	0.19	7.17	98.82
9	Zapolyarnaya	43.78	0.37	0.86	19.87	27.03	0.18	6.83	98.94
10	Zapolyarnaya	43.41	0.4	0.93	21.5	26.17	0.2	7.11	99.73
11	Zapolyarnaya	43.34	0.48	0.87	21.85	25.8	0.14	7.31	99.79
12	Zapolyarnaya	45.6	0.54	0.83	17.15	27.81	0.21	7.31	99.49
13	Zapolyarnaya	44.52	0.53	0.89	19.33	27.11	0.22	7.14	99.76
14	Zapolyarnaya	47.24	0.8	0.3	16.46	24.65	0.17	9.93	99.59
15	Zapolyarnaya	44.35	0.31	4.26	16.97	25.5	0.26	7.94	99.62
16	Zapolyarnaya	47.58	0.49	1.49	13.81	27.36	0.26	8.51	99.51
17	Zapolyarnaya	48.61	0.62	5.61	15.23	11.12	0.43	18.07	99.75
18	Zapolyarnaya	44.64	0.54	0.85	19.23	28.01	0.2	6.69	100.17
19	Zapolyarnaya	42.15	0.74	8.47	23.12	11.03	0.31	14.9	100.72
20	Zapolyarnaya	45.15	0.49	0.84	18.84	27.84	0.12	7.09	100.37
21	Zapolyarnaya	45.93	0.51	0.95	17.23	28.1	0.23	7.28	100.25
22	Zapolyarnaya	43.2	0.69	8.56	15.23	23.86	0.16	8.35	100.1
23	Zapolyarnaya	45.07	0.51	0.89	18.03	28.3	0.21	6.76	99.8
24	Zapolyarnaya	45.09	0.54	0.84	18.27	27.72	0.24	7.1	99.86
25	Zapolyarnaya	48.06	2.6	2.38	15.87	14.11	0.3	16.22	99.63
26	Zapolyarnaya	45.32	0.45	0.88	17.71	28.46	0.22	6.78	99.82
27	Zapolyarnaya	54.09	0.57	2.26	4.12	22.64	0.23	14.5	98.48
28	Zapolyarnaya	53.24	0.53	3.97	4.49	21.09	0.25	14.91	98.52
29	Zapolyarnaya	46.35	1.19	4.09	19.89	11.62	0.26	16.72	100.13
30	Zapolyarnaya	45.09	0.48	0.88	18.19	28.4	0.22	6.7	99.98
31	Zapolyarnaya	45.22	0.5	0.88	18.04	28.33	0.19	6.81	99.97
32	Zapolyarnaya	55.23	0.21	2.02	2.39	24.08	0.22	14.25	98.43
33	Zapolyarnaya	45.66	0.51	0.95	17.3	28.3	0.19	7.07	100.01
34	Zapolyarnaya	52.78	0.68	4.03	4.47	22.72	0.21	13.8	98.75
35	Zapolyarnaya	52.05	0.44	2.6	6.88	24.22	0.22	12.55	98.97
36	Zapolyarnaya	43.59	0.27	3.09	19.16	27.41	0.22	6.5	100.26
37	Zapolyarnaya	52.67	0.65	4.07	5.08	22.06	0.21	14.1	98.88
38	Zapolyarnaya	46.85	0.55	0.73	15.5	28.74	0.18	7.41	99.95
39	Zapolyarnaya	53.02	0.74	2.79	6.95	19.59	0.26	15.66	99.1
40	Zapolyarnaya	48.55	0.72	0.16	13.85	27.23	0.12	9.16	99.81
41	Zapolyarnaya	46	0.21	2.26	16.38	27.13	0.25	7.85	100.09
42	Zapolyarnaya	47.32	0.06	3.24	13.33	26.88	0.37	8.59	99.8
43	Zapolyarnaya	44.55	0.48	0.84	20.03	27.45	0.17	6.98	100.5
44	Zapolyarnaya	45.56	0.46	0.82	17.99	28.29	0.19	7.01	100.33
45	Zapolyarnaya	44.73	0.42	0.87	19.51	28.1	0.21	6.68	100.53
46	Zapolyarnaya	54.48	0.58	1.61	4.71	23.1	0.26	14.38	99.13
47	Zapolyarnaya	44.54	0.44	0.97	19.66	28.26	0.2	6.53	100.64
48	Zapolyarnaya	46.23	0.47	0.76	17.2	28.13	0.21	7.43	100.43
49	Zapolyarnaya	46.32	0.52	0.8	16.67	28.5	0.21	7.3	100.38
50	Zapolyarnaya	51.38	0.69	2.86	7.74	24.49	0.19	12.1	99.49
51	Zapolyarnaya	46.26	0.58	0.9	16.7	28.5	0.2	7.25	100.4
52	Zapolyarnaya	53.44	0.61	3.74	4.47	22.51	0.21	14.21	99.19
53	Zapolyarnaya	49.31	0.33	0.81	12.52	27.38	0.24	9.4	100.01
54	Zapolyarnaya	53.54	0.58	1.73	5.62	24.4	0.23	13.2	99.32
55	Zapolyarnaya	54.31	0.6	2.86	3.63	23.2	0.23	14.27	99.13
56	Zapolyarnaya	48.86	0.48	1.44	12.67	26.74	0.32	9.5	100.06
57	Zapolyarnaya	45.85	0.46	0.88	17.46	28.93	0.21	6.78	100.57
58	Zapolyarnaya	47.96	0.43	1.38	14.99	25.62	0.2	9.72	100.32
59	Zapolyarnaya	53.1	0.66	4.18	4.88	21.78	0.18	14.5	99.33
60	Zapolyarnaya	55.86	0.14	0.35	3.69	24.51	0.29	14.31	99.22
61	Zapolyarnaya	46.22	0.51	0.97	17.01	28.44	0.18	7.27	100.62
62	Zapolyarnaya	45.32	0.54	0.94	19.6	26.15	0.19	8.11	100.89
63	Zapolyarnaya	54.14	0.09	0.72	8.44	20.31	0.24	15.81	99.79
64	Zapolyarnaya	51.97	0.2	0.45	10.15	24.37	0.26	12.48	100
65	Zapolyarnaya	47.4	0.54	0.49	17.47	24.67	0.21	9.96	100.75
66	Zapolyarnaya	53.64	0.59	3.3	4.77	22.71	0.24	14.2	99.49
67	Zapolyarnaya	48.33	0.61	0.04	14.96	27.65	0.16	8.78	100.53
68	Zapolyarnaya	45.74	0.5	0.8	18.45	27.86	0.17	7.36	100.9
69	Zapolyarnaya	46.22	0.52	0.8	17.68	27.86	0.21	7.57	100.85
70	Zapolyarnaya	45.77	0.48	0.88	18.35	27.98	0.23	7.26	100.95
71	Zapolyarnaya	45.99	0.51	0.82	17.92	28.31	0.21	7.2	100.96
72	Zapolyarnaya	48.51	0.45	1.48	13.36	27.73	0.22	8.79	100.54
73	Zapolyarnaya	46.98	0.49	0.72	16.11	28.99	0.22	7.31	100.82
74	Zapolyarnaya	52.03	0.78	2.53	8.52	20.99	0.23	14.6	100.07
75	Zapolyarnaya	46.33	0.51	0.76	17.56	28.3	0.2	7.38	101.04
76	Zapolyarnaya	48.91	0.46	1.5	12.72	27.86	0.18	8.94	100.57
77	Zapolyarnaya	45.1	0.43	0.85	19.98	27.58	0.19	7.18	101.31
78	Zapolyarnaya	52.85	0.7	4.4	5.31	22.36	0.26	13.97	99.85
79	Zapolyarnaya	51.97	0.48	2.62	8.88	22.54	0.21	13.48	100.22
80	Zapolyarnaya	53.5	0.55	2.6	6.02	23.05	0.23	13.96	99.96
81	Zapolyarnaya	54.01	0.7	3.26	4.27	23.12	0.21	14.19	99.81
82	Zapolyarnaya	45.47	0.56	1.29	19.82	25.5	0.19	8.54	101.39
83	Zapolyarnaya	50.01	0	4.25	9.08	26.56	0.33	10.14	100.37
84	Zapolyarnaya	48.34	0.63	0.05	15.07	28.1	0.2	8.54	100.98
85	Zapolyarnaya	54.17	0.58	3.2	4.18	23.28	0.25	14.17	99.9
86	Zapolyarnaya	46.89	0.5	0.87	16.95	28.03	0.2	7.82	101.28
87	Zapolyarnaya	46.19	0.48	0.88	19.74	24.91	0.26	9.18	101.64
88	Zapolyarnaya	47.55	0.57	0.48	18.01	24.48	0.25	10.14	101.51
89	Zapolyarnaya	48.48	0.46	1.48	14.61	26.6	0.2	9.42	101.25
90	Zapolyarnaya	48.92	2.18	0.33	9.09	28.3	0.15	9.93	100.71
91	Zapolyarnaya	47.8	0.5	0.52	17.77	24.58	0.22	10.2	101.59
92	Zapolyarnaya	47.7	0.58	0.52	17.65	24.97	0.24	9.94	101.63
93	Zapolyarnaya	44.32	0.36	1.01	22.22	26.58	0.21	7.36	102.11
94	Zapolyarnaya	54.82	0.11	1.5	6.36	22.64	0.25	14.84	100.56
95	Zapolyarnaya	46.75	0.43	0.79	17.69	28.21	0.22	7.63	101.72
96	Zapolyarnaya	51.79	0.57	3.89	9.89	19.75	0.19	14.95	101.05
97	Zapolyarnaya	48.52	0.51	0.46	16.46	25.7	0.17	9.96	101.78
98	Zapolyarnaya	51.08	0.43	1.73	10.09	27.21	0.24	10.38	101.18
99	Zapolyarnaya	52.51	0.75	2.77	9.26	20.86	0.23	14.69	101.12
100	Zapolyarnaya	48.03	0.54	0.55	17.61	24.86	0.2	10.17	101.95
101	Zapolyarnaya	48.16	0.47	0.09	17.19	26.68	0.14	9.25	101.97
102	Zapolyarnaya	47.69	0.54	0.95	15.18	30.13	0.19	7.1	101.86
103	Zapolyarnaya	55.46	0.54	3.34	2.02	24.76	0.2	14.08	100.56
104	Zapolyarnaya	46.78	0.43	0.79	17.85	28.99	0.17	7.24	102.25
105	Zapolyarnaya	54.96	0.44	1.77	5.35	24.23	0.21	14.04	101.04
106	Zapolyarnaya	54.3	0.56	2.29	5.85	24.26	0.21	13.68	101.19
107	Zapolyarnaya	54.01	0.42	2.15	8.21	20.82	0.24	15.49	101.43
108	Zapolyarnaya	50.34	1.13	4.74	11.81	17.44	0.26	15.74	101.86
109	Zapolyarnaya	45.9	1.57	8.9	15.34	16.61	0.23	13.71	102.28
110	Zapolyarnaya	49.01	0.46	1.68	14.4	27.15	0.22	9.37	102.28
111	Zapolyarnaya	48.1	0.43	1.22	15.81	28.4	0.27	8.19	102.44
112	Zapolyarnaya	49.12	0.98	6.08	12.84	18.52	0.21	14.33	102.17
113	Zapolyarnaya	46.13	0.51	0.71	19.79	28.18	0.22	7.35	102.91
114	Zapolyarnaya	48.61	0.48	0.73	14.75	30.22	0.19	7.46	102.44
115	Zapolyarnaya	51.09	1.01	3.75	11.57	18.91	0.27	15.22	102.13
116	Zapolyarnaya	37.68	2.08	12.58	28.35	8.98	0.24	13.88	103.86
117	Zapolyarnaya	54.41	0.67	3.63	5.77	21.79	0.21	15.11	101.6
118	Zapolyarnaya	50.34	0.82	0.38	13.25	27.54	0.2	9.83	102.36
119	Zapolyarnaya	47.49	0.54	1.02	16.8	29.21	0.19	7.46	102.71
120	Zapolyarnaya	53.51	0.53	0.25	9.33	25.5	0.23	12.59	102
121	Zapolyarnaya	54.51	1	3.27	4.65	23.84	0.3	14.02	101.69
122	Zapolyarnaya	55.06	0.41	2.61	5.71	22.87	0.22	14.86	101.8
123	Zapolyarnaya	41.66	2.43	12.01	19.35	14.84	0.21	12.61	103.17
124	Zapolyarnaya	50.76	0.97	1.9	14.19	20.79	0.2	13.85	102.69
125	Zapolyarnaya	55.7	0.63	3.12	3.95	23.68	0.22	14.72	102.08
126	Zapolyarnaya	57.5	0.1	0.41	2.97	27.09	0.26	13.66	101.99
127	Zapolyarnaya	58.58	0.11	0.47	0	29.57	0.26	12.7	101.73
128	Zapolyarnaya	53.56	0.25	1.65	9.79	23.59	0.25	13.64	102.73
129	Zapolyarnaya	46.73	0.32	0.91	18.86	29.99	0.23	6.62	103.66
130	Zapolyarnaya	59.12	0.1	0.53	0.31	26.59	0.22	14.84	101.8
131	Zapolyarnaya	54.1	0.27	3.5	6.96	23.45	0.23	14.02	102.55
132	Zapolyarnaya	56.06	0.61	2.8	4.3	23.45	0.22	15.01	102.47
133	Zapolyarnaya	55.74	0.66	3.01	4.12	24.49	0.22	14.27	102.52
134	Zapolyarnaya	58.11	0.14	1.26	1.86	26.24	0.24	14.49	102.39
135	Zapolyarnaya	52.42	0.77	5.26	9.47	19.81	0.28	15.17	103.18
136	Zapolyarnaya	57.78	0.38	2.11	1.13	26.75	0.21	14.02	102.38
137	Zapolyarnaya	59.54	0.05	0.83	0	27.54	0.23	14.3	102.51
138	Zapolyarnaya	50.41	1.08	7.13	10.48	20.19	0.22	14.04	103.64
139	Zapolyarnaya	57.16	1.84	2.82	1.31	24.98	0.28	14.7	103.15
140	Deymos	44	0.56	0.86	20.98	21.22	0.16	10.2	97.98
141	Deymos	43.63	0.57	2.88	18.44	23.17	0.28	8.85	97.83
142	Deymos	46.8	0.59	0.51	15.46	23.9	0.24	10.1	97.65
143	Deymos	43.88	0.28	0.76	19.65	25.93	0.19	7.52	98.27
144	Deymos	44.73	0.51	0.93	18.07	25.98	0.19	7.88	98.29
145	Deymos	44.34	0.19	2.45	17.58	25.45	0.31	7.93	98.26
146	Deymos	43.94	0.49	0.82	19.61	25.94	0.19	7.51	98.51
147	Deymos	52.36	0.21	1.54	5.23	25.31	0.33	12.08	97.14
148	Deymos	43.85	0.48	0.86	19.34	27.43	0.19	6.66	98.86
149	Deymos	45.08	0.47	0.71	17.65	27.34	0.21	7.31	98.81
150	Deymos	44.12	1.17	1.01	18.65	26.52	0.21	7.28	98.99
151	Deymos	44.63	0.5	0.9	20.53	22.75	0.24	9.62	99.19
152	Deymos	44.93	0.84	0.47	17.69	26.66	1	7.21	98.89
153	Deymos	43.49	0.45	0.82	20.67	26.65	0.23	6.87	99.2
154	Deymos	43.91	0.44	1.16	20.45	25	0.23	8	99.2
155	Deymos	46.17	0.03	2.56	14.73	26.7	0.41	8.1	98.73
156	Deymos	43.91	0.56	0.84	20.03	26.82	0.2	7	99.37
157	Deymos	44.86	0.32	0.8	17.99	28.51	0.2	6.55	99.27
158	Deymos	48.41	0.5	0.51	13.58	25.68	0.22	9.9	98.82
159	Deymos	44.72	0.47	0.82	18.7	27.29	0.2	7.14	99.35
160	Deymos	51.67	0.69	3.7	6.56	20.54	0.21	14.6	98.23
161	Deymos	51.65	0.14	1.34	7.23	26.93	0.27	10.8	98.37
162	Deymos	44.08	0.48	0.81	20.18	26.95	0.16	7.06	99.77
163	Deymos	48.81	0.45	1.36	12.12	26.17	0.28	9.78	98.97
164	Deymos	45.91	0.52	1	17.8	25.17	0.22	8.93	99.56
165	Deymos	47.07	0.58	0.95	15.24	26.34	0.21	8.88	99.33
166	Deymos	48.08	0.6	0.29	14.59	25.83	0.19	9.67	99.27
167	Deymos	44.49	0.48	0.85	19.25	27.68	0.19	6.82	99.78
168	Deymos	44.4	0.49	0.88	19.56	27.24	0.23	7	99.82
169	Deymos	42.67	0.3	3.16	20.63	26.35	0.22	6.62	99.95
170	Deymos	51.64	0.37	0.09	9.62	24.86	0.25	11.99	98.85
171	Deymos	45.66	0.46	0.94	17.53	27.17	0.21	7.68	99.66
172	Deymos	53.05	0.48	0.08	6.12	27.04	0.22	11.5	98.54
173	Deymos	44.16	0.17	0.88	21.03	25.83	0.19	7.72	100.04
174	Deymos	45.87	0.53	0.75	17.13	27.59	0.22	7.55	99.66
175	Deymos	50.98	0.5	0.18	9.56	27.09	0.28	10.36	98.95
176	Deymos	50.29	0.39	0.25	11.5	25.5	0.18	10.98	99.12
177	Deymos	41.51	0.12	6.56	19.51	25.48	0.22	6.54	99.98
178	Deymos	45.45	0.55	0.89	17.59	27.78	0.21	7.26	99.77
179	Deymos	51.54	0.43	0.12	9.34	26.08	0.19	11.26	98.97
180	Deymos	50.18	0.11	0.76	9.75	28.94	0.29	8.94	99.01
181	Deymos	51.93	0.96	3.36	7.12	20.45	0.22	14.65	98.77
182	Deymos	48.31	0.09	1.91	11.97	28.47	0.29	8.24	99.29
183	Deymos	44.76	0.46	0.97	18.81	28.01	0.22	6.75	99.98
184	Deymos	44.49	0.47	0.87	19.76	27.31	0.16	7.04	100.11
185	Deymos	43.91	0.15	6.69	15.07	26.42	0.26	7.18	99.68
186	Deymos	51.03	0.29	0.04	10.6	26.08	0.2	11	99.23
187	Deymos	52.09	0.29	0.86	8.1	25.6	0.26	11.78	99
188	Deymos	49.68	0.88	0.5	12.07	25.22	0.21	10.82	99.42
189	Deymos	50.83	0.52	2.19	8.91	24.82	0.21	11.63	99.16
190	Deymos	51.91	0.24	0.07	9.22	26.11	0.23	11.41	99.18
191	Deymos	45.57	0.51	0.82	18.33	26.88	0.21	7.79	100.11
192	Deymos	49.18	0.34	0.11	12.45	28.53	0.23	8.7	99.58
193	Deymos	48.9	0.08	2.45	10.36	28.94	0.31	8.29	99.38
194	Deymos	51.18	0.42	0.06	10.38	26.01	0.22	11.1	99.37
195	Deymos	45.22	0.49	0.8	18.64	27.58	0.21	7.24	100.21
196	Deymos	50.55	0.5	0.06	10.73	27.32	0.24	10.04	99.44
197	Deymos	45.28	0.6	0.82	18.34	27.73	0.17	7.22	100.22
198	Deymos	46.61	0.49	0.74	16.1	28.24	0.16	7.61	100
199	Deymos	51.86	0.23	1.44	7.69	26.5	0.26	11.16	99.16
200	Deymos	47.51	0.86	0.53	15.78	25	0.23	9.92	99.99
201	Deymos	46.8	0.55	1.07	15.3	28.6	0.2	7.45	99.97
202	Deymos	47.6	0.52	1.17	14.4	27.37	0.22	8.55	99.86
203	Deymos	41.74	0.31	3.83	22.72	25.06	0.19	6.89	100.74
204	Deymos	52.61	0.56	2.58	6.68	22.68	0.26	13.7	99.12
205	Deymos	51.51	0.25	0.29	8.97	27.85	0.22	10.25	99.36
206	Deymos	49.86	0.55	0.65	12.07	25.75	0.22	10.58	99.68
207	Deymos	45.39	0.58	1.01	18.99	25.95	0.28	8.18	100.38
208	Deymos	46.86	0.57	2.57	16.21	23.08	0.3	10.52	100.11
209	Deymos	51.21	0.13	0.56	9.9	26.74	0.2	10.73	99.49
210	Deymos	51.5	0.2	0.76	8.77	26.24	0.26	11.13	98.89
211	Deymos	52.31	0.82	0.92	6.83	25.72	0.22	11.85	98.68
212	Deymos	46.51	0.49	0.86	15.81	28.08	0.18	7.63	99.58
213	Deymos	45.36	0.52	0.87	17.36	28.81	0.23	6.59	99.74
214	Deymos	45.91	0.39	0.81	16.8	28.48	0.21	7.07	99.68
215	Deymos	49.7	0.63	0.48	12.18	25.02	0.24	10.92	99.2
216	Deymos	51.39	0.69	0.82	8.47	25.86	0.2	11.35	98.85
217	Deymos	49.5	0.37	1.7	11.66	24.42	0.38	11.09	99.17
218	Deymos	51.61	0.56	2.16	6.86	25.76	0.22	11.48	98.68
219	Deymos	51.16	0.85	0.91	8.54	26.08	0.21	11.08	98.86
220	Deymos	51.58	0.38	1.22	7.38	27.34	0.27	10.54	98.73
221	Deymos	51.21	0.46	0.83	9.54	24.91	0.25	11.73	98.95
222	Deymos	51.85	0.79	0.47	7.73	26.52	0.21	11.18	98.77
223	Deymos	51.03	0.54	1.8	7.92	26.38	0.24	10.84	98.8
224	Deymos	44.6	0.48	0.86	20.25	25.63	0.21	8	100.03
225	Deymos	51.7	0.37	0.97	7.73	26.85	0.23	10.9	98.77
226	Deymos	53.09	0.45	4	4.32	21.84	0.2	14.46	98.43
227	Deymos	50.65	0.4	0.48	10.07	26.62	0.21	10.53	99.01
228	Deymos	50.66	0.21	0.84	9.22	28.02	0.31	9.66	98.92
229	Deymos	51.22	0.55	0.74	8.42	27.22	0.21	10.46	98.84
230	Deymos	47.54	0.44	0.72	13.56	29.44	0.18	7.41	99.36
231	Deymos	52.81	0.66	4.04	4.63	21.68	0.26	14.35	98.46
232	Deymos	51.05	0.14	0.8	7.83	29.83	0.28	8.86	98.78
233	Deymos	51.67	0.76	0.46	8.25	26.24	0.17	11.26	98.84
234	Deymos	52.04	0.36	0.78	7.12	27.39	0.26	10.75	98.72
235	Deymos	51.6	0.19	0.86	7.84	27.67	0.24	10.37	98.78
236	Deymos	51.87	0.43	1.17	6.57	28.08	0.27	10.26	98.65
237	Deymos	51.25	0.47	1.33	7.91	27	0.23	10.59	98.8
238	Deymos	52.13	0.31	1.24	6.94	26.59	0.22	11.26	98.71
239	Deymos	51.23	0.79	0.66	8.89	25.73	0.21	11.33	98.9
240	Deymos	50.61	0.52	0.96	9.4	26.76	0.28	10.37	98.92
241	Deymos	49.47	0.54	0.39	12.29	25.99	0.21	10.29	99.23
242	Deymos	51.89	0.32	1.16	7	27.16	0.28	10.83	98.7
243	Deymos	51.77	0.58	2.08	6.42	26.37	0.19	11.22	98.64
244	Deymos	51.76	0.65	0.34	8.49	25.84	0.24	11.5	98.85
245	Deymos	54.35	0.61	3.34	3.31	20.85	0.23	15.61	98.33
246	Deymos	51.05	0.17	0.9	7.97	29.23	0.25	9.21	98.79
247	Deymos	51.63	0.22	1.01	7.46	27.86	0.28	10.27	98.75
248	Deymos	52.24	0.41	0.62	6.76	27.76	0.25	10.64	98.68
249	Deymos	51.76	0.83	0.49	7.9	26.17	0.22	11.35	98.79
250	Deymos	52.43	0.24	0.71	6.67	27.22	0.28	11.05	98.66
251	Deymos	50.84	0.24	0.97	8.61	28.32	0.28	9.6	98.86
252	Deymos	51.22	0.42	0.23	8.61	28.24	0.24	9.88	98.87
253	Deymos	45.48	0.88	0.77	17.48	27.6	0.21	7.34	99.76
254	Deymos	52.12	0.6	0.16	7.69	26.72	0.18	11.24	98.77
255	Deymos	50.9	0.31	0.78	8.66	28.34	0.23	9.65	98.87
256	Deymos	52.17	0.43	0.17	7.33	27.76	0.31	10.57	98.73
257	Deymos	53.12	0.44	1.62	6.36	23.14	0.28	13.66	98.64
258	Deymos	47.67	0.55	1.07	13.97	27.04	0.21	8.81	99.4
259	Deymos	48.23	0.53	0.97	13.01	27.53	0.22	8.78	99.3
260	Deymos	47.23	0.46	0.82	14.34	28.79	0.21	7.56	99.43
261	Deymos	51.34	0.5	1.14	7.44	28.04	0.28	10.01	98.75
262	Deymos	52.95	0.22	2.11	6.25	23.32	0.23	13.52	98.63
263	Deymos	49.35	0.4	1.61	10.52	27.64	0.25	9.26	99.05
264	Deymos	52.72	0.16	1.16	5.75	27.37	0.26	11.12	98.58
265	Deymos	51.41	0.73	0.24	8.35	27.42	0.24	10.43	98.84
266	Deymos	51.66	3.16	0.23	6.36	24.91	0.22	12.01	98.62
267	Deymos	51.56	0.7	0.12	8.59	26.74	0.25	10.88	98.86
268	Deymos	54.8	0.56	3.25	2.74	20.94	0.21	15.78	98.27
269	Deymos	52.1	0.8	2.44	6.43	23.7	0.25	12.87	98.63
270	Deymos	45.69	0.29	0.96	16.86	29	0.19	6.68	99.68
271	Deymos	51.61	1.03	0.1	7.81	27.39	0.22	10.58	98.78
272	Deymos	51.68	0.54	1.87	7.05	25.71	0.26	11.54	98.71
273	Deymos	51.86	0.41	1.04	7.11	27.28	0.28	10.71	98.71
274	Deymos	51.44	1.46	0.2	8.2	26.11	0.23	11.18	98.82
275	Deymos	51.41	0.17	0.87	7.03	29.89	0.3	9.01	98.69
276	Deymos	51.87	1.84	0.22	6.91	26.38	0.22	11.24	98.68
277	Deymos	50.96	2.93	1.13	7.37	23.86	0.3	12.17	98.75
278	Deymos	54.41	0.65	2.59	2.82	23.29	0.23	14.27	98.29
279	Deymos	49.97	0.51	0.5	10.33	28.04	0.24	9.38	99.04
280	Deymos	50.47	1.97	0.71	8.95	25.52	0.24	11.02	98.9
281	Deymos	51.81	1.72	0.48	6.71	26.4	0.19	11.27	98.66
282	Novinka	44.46	0.98	0.81	19.67	27.23	0.19	7.09	100.5
283	Novinka	48.08	1.65	0.16	14.91	26.67	0.19	9.26	101.02
284	Novinka	54.86	0.46	1.13	5.38	22.58	0.21	14.92	99.59
285	Novinka	44.19	0.32	1.04	19.9	27.37	0.21	6.82	99.84
286	Novinka	48.27	0.35	0.15	14.67	26.07	0.13	9.69	99.39
287	325 years to Yakutia	42.71	0.43	0.8	21.53	26.1	0.22	6.82	98.67
288	326 years to Yakutia	44.67	0.49	0.89	18.44	26.74	0.2	7.42	98.85
289	327 years to Yakutia	43.43	0.44	0.85	20.78	26.56	0.19	6.9	99.15
290	328 years to Yakutia	43.48	0.44	0.88	20.92	26.13	0.2	7.16	99.22
291	329 years to Yakutia	43.61	0.49	0.92	20.87	26.24	0.17	7.18	99.48
292	330 years to Yakutia	44.83	0.54	0.69	19.4	25.33	0.23	8.3	99.36
293	325 years to Yakutia	43.72	0.47	0.89	20.31	27.12	0.21	6.72	99.45
294	325 years to Yakutia	44.68	0.48	0.93	18.78	26.96	0.18	7.31	99.32
295	325 years to Yakutia	45.4	0.58	0.96	17.69	26.38	0.21	8	99.23
296	325 years to Yakutia	42.85	0.42	0.88	22.44	26.14	0.2	6.84	99.77
297	325 years to Yakutia	51.65	0.65	3.95	6.66	20.55	0.21	14.44	98.16
298	325 years to Yakutia	44.01	0.39	0.79	20.83	25.8	0.2	7.64	99.7
299	325 years to Yakutia	44.1	0.59	0.99	20.07	26.25	0.22	7.4	99.63
300	325 years to Yakutia	44.2	0.5	0.85	20.31	25.97	0.2	7.62	99.67
301	325 years to Yakutia	44.42	0.57	0.84	19.28	27.16	0.24	7.04	99.56
302	325 years to Yakutia	44.22	0.48	0.89	20.4	25.75	0.24	7.74	99.73
303	325 years to Yakutia	45.3	0.52	0.83	17.91	27.43	0.2	7.35	99.54
304	325 years to Yakutia	43.99	0.46	0.83	20.53	26.79	0.21	7.04	99.86
305	325 years to Yakutia	43.64	0.47	0.85	21.25	26.31	0.21	7.14	99.88
306	325 years to Yakutia	41.78	0.13	6.53	19.45	24.32	0.25	7.29	99.75
307	325 years to Yakutia	45.01	0.5	0.85	18.95	26.67	0.2	7.63	99.81
308	325 years to Yakutia	43.13	0.18	6.16	17.09	25.24	0.24	7.46	99.5
309	325 years to Yakutia	45.29	0.58	0.78	18.43	26.93	0.23	7.61	99.85
310	325 years to Yakutia	44.77	0.49	0.77	19.04	27.69	0.21	6.93	99.9
311	325 years to Yakutia	44.57	0.53	0.82	19.25	27.64	0.21	6.88	99.93
312	325 years to Yakutia	44.28	0.41	0.94	20.1	27	0.22	7.09	100.08
313	325 years to Yakutia	45.92	0.51	0.76	17.64	26.71	0.19	8.1	99.87
314	325 years to Yakutia	44.81	0.57	0.81	19.38	27.02	0.23	7.33	100.17
315	325 years to Yakutia	44.55	0.45	0.89	19.5	27.82	0.19	6.77	100.19
316	325 years to Yakutia	45.67	0.54	1.01	16.98	28.3	0.17	7.1	99.82
317	325 years to Yakutia	45.83	0.48	0.86	17.23	27.79	0.22	7.45	99.94
318	325 years to Yakutia	45.45	0.56	0.98	17.88	27.63	0.19	7.33	100.04
319	325 years to Yakutia	44.65	0.44	0.82	19.48	27.84	0.19	6.81	100.25
320	325 years to Yakutia	45.94	0.48	0.89	17.56	27.1	0.19	7.89	100.09
321	325 years to Yakutia	44.68	0.46	0.88	19.61	27.54	0.23	6.96	100.35
322	325 years to Yakutia	51.24	0.7	4.29	8.2	19.72	0.26	14.67	99.13
323	325 years to Yakutia	44.99	0.46	0.8	19.21	27.63	0.17	7.11	100.39
324	325 years to Yakutia	45.57	0.49	0.98	17.99	27.98	0.21	7.17	100.39
325	325 years to Yakutia	44.97	0.54	0.92	19.23	27.51	0.21	7.14	100.53
326	325 years to Yakutia	44.61	0.44	0.81	19.17	27.75	0.19	6.85	99.85
327	325 years to Yakutia	44.63	0.42	0.92	19.26	27.54	0.22	6.94	99.93
328	325 years to Yakutia	45.48	0.52	0.81	17.77	27.57	0.21	7.37	99.75
329	325 years to Yakutia	51.06	0.49	2.57	8.3	23.89	0.27	12.21	98.8
330	325 years to Yakutia	45.91	0.53	0.76	17.09	27.57	0.18	7.59	99.63
331	325 years to Yakutia	44.98	0.53	0.87	18.45	27.5	0.2	7.19	99.78
332	325 years to Yakutia	45.41	0.48	0.86	17.73	27.98	0.2	7.11	99.79
333	325 years to Yakutia	47.64	0.49	1.35	13.34	27.92	0.23	8.26	99.26
334	325 years to Yakutia	44.95	0.5	0.88	18.73	27.13	0.2	7.37	99.8
335	325 years to Yakutia	46.09	0.52	1.01	16.15	28.41	0.19	7.21	99.59
336	325 years to Yakutia	45.56	0.62	0.96	17.29	27.6	0.22	7.39	99.65
337	325 years to Yakutia	45.73	0.47	0.86	17.07	28.33	0.19	7.07	99.72
338	325 years to Yakutia	44.7	0.46	0.81	18.82	27.86	0.18	6.87	99.79
339	325 years to Yakutia	52.57	0.52	2.16	6.82	22.48	0.23	13.81	98.64
340	325 years to Yakutia	51.1	0.49	2.95	7.73	24.08	0.24	12.14	98.73
341	325 years to Yakutia	40.74	0.14	7.06	44.39		0.24	6.63	99.31
342	325 years to Yakutia	44.76	0.47	0.96	46.3		0.21	6.53	99.47
343	325 years to Yakutia	45.03	0.49	0.92	46.19		0.2	6.92	99.89
344	325 years to Yakutia	45.03	0.47	0.81	44.65		0.21	7.71	99.01
345	325 years to Yakutia	45.18	0.51	0.83	45.78		0.2	7.18	99.9
346	325 years to Yakutia	45.29	0.5	0.87	45.84		0.22	7.12	99.93
347	325 years to Yakutia	45.29	0.6	0.86	45.09		0.22	7.23	99.38
348	325 years to Yakutia	45.42	0.48	0.81	45.76		0.2	7.18	100.05
349	326 years to Yakutia	45.73	0.51	0.82	45.34		0.2	7.09	99.83
350	327 years to Yakutia	45.83	0.52	0.81	45.67		0.21	7.31	100.41
351	328 years to Yakutia	46.17	0.55	0.93	44.92		0.22	7.51	100.35
352	Zimnyaya	42.54	0.49	0.88	21.12	25.86	0.2	6.84	97.93
353	Zimnyaya	47.6	0.2	1.52	12.61	25.29	0.23	9.7	97.16
354	Zimnyaya	44.61	0.48	1.11	17.74	25.24	0.22	8.23	97.66
355	Zimnyaya	43.17	0.46	0.86	20.26	26.02	0.19	7.07	98.03
356	Zimnyaya	46.42	0.45	1.45	14.46	25.51	0.25	8.99	97.57
357	Zimnyaya	51.95	0.41	2.55	6.66	19.94	0.22	14.96	96.8
358	Zimnyaya	42.94	0.47	0.81	20.72	26.05	0.17	6.97	98.17
359	Zimnyaya	43.66	0.56	0.81	18.67	26.76	0.18	7.17	98.2
360	Zimnyaya	43.64	0.35	0.84	19.96	26.37	0.21	7.1	98.47
361	Zimnyaya	43.01	0.46	0.86	20.76	26.42	0.23	6.75	98.5
362	Zimnyaya	43.14	0.5	0.83	20.89	25.82	0.19	7.17	98.54
363	Zimnyaya	43.54	0.52	0.85	19.83	26.41	0.17	7.07	98.43
364	Zimnyaya	43.8	0.52	0.75	19.5	26.41	0.2	7.17	98.36
365	Zimnyaya	44.41	0.53	0.87	18.72	25.93	0.18	7.78	98.47
366	Zimnyaya	43.65	0.48	0.87	19.68	26.62	0.23	6.96	98.5
367	Zimnyaya	43.99	0.49	1	19.46	25.79	0.19	7.63	98.57
368	Zimnyaya	43.49	0.5	0.9	20.14	26.3	0.18	7.1	98.65
369	Zimnyaya	43.51	0.5	0.94	20.2	25.95	0.2	7.34	98.72
370	Zimnyaya	49.21	0.39	0.07	11.81	26.22	0.21	10.02	97.97
371	Zimnyaya	44.46	0.53	0.95	18.58	26.36	0.22	7.55	98.7
372	Zimnyaya	46.86	0.92	0.66	14.86	25.1	0.14	9.64	98.42
373	Zimnyaya	51.81	0.26	2.27	8.12	20.53	0.26	14.49	97.77
374	Zimnyaya	46.41	0.45	1.31	15.3	26.32	0.22	8.52	98.53
375	Zimnyaya	44.71	0.52	0.91	18.6	25.93	0.22	7.9	98.82
376	Zimnyaya	44.69	0.49	0.94	18.71	26.06	0.18	7.83	98.9
377	Zimnyaya	44.76	0.36	1.01	18.22	27.33	0.19	7.14	99.01
378	Zimnyaya	44.57	0.47	0.86	18.78	26.85	0.21	7.3	99.04
379	Zimnyaya	43.96	0.52	0.85	20.11	26.14	0.21	7.39	99.18
380	Zimnyaya	44.21	0.55	0.92	19.58	26.34	0.22	7.4	99.22
381	Zimnyaya	44.48	0.49	0.83	18.81	27.27	0.22	7.04	99.18
382	Zimnyaya	45.11	0.5	0.88	17.56	27.68	0.19	7.12	99.04
383	Zimnyaya	44.4	0.71	0.77	19.39	26.47	0.17	7.47	99.41
384	Zimnyaya	45.17	0.58	0.93	17.91	26.78	0.23	7.65	99.28
385	Zimnyaya	44.36	0.65	0.86	18.99	27.27	0.18	7.02	99.38
386	Zimnyaya	45.16	0.43	0.92	18.18	26.76	0.17	7.67	99.29
387	Zimnyaya	44.16	0.51	0.9	19.79	26.71	0.19	7.21	99.51
388	Zimnyaya	44.22	0.5	0.9	19.78	26.61	0.21	7.26	99.48
389	Zimnyaya	44.2	0.45	0.95	19.62	27.18	0.17	6.95	99.53
390	Zimnyaya	49.18	0.51	1.78	11.25	24.91	0.21	10.74	98.63
391	Zimnyaya	45.27	0.58	0.79	17.88	27.18	0.18	7.5	99.4
392	Zimnyaya	50.92	1.03	3.87	9.35	17.22	0.26	15.89	98.57
393	Zimnyaya	47.14	0.39	1.42	15.2	25.36	0.23	9.42	99.16
394	Zimnyaya	44.44	0.53	0.88	19.63	26.5	0.2	7.44	99.62
395	Zimnyaya	45.19	0.58	0.93	18.58	26.06	0.22	8.05	99.61
396	Zimnyaya	45.07	0.46	0.99	18.47	26.87	0.21	7.54	99.61
397	Zimnyaya	45.5	0.48	0.89	17.98	26.5	0.2	8	99.59
398	Zimnyaya	51.02	0.71	5.11	8.59	16.87	0.21	16.16	98.68
399	Zimnyaya	47.73	0.34	1.46	13.82	26.59	0.25	9.04	99.25
400	Zimnyaya	44.34	0.5	0.91	20.1	26.37	0.15	7.5	99.89
401	Zimnyaya	47.6	0.65	1.44	13.07	27.02	0.23	8.9	99.17
402	Zimnyaya	48.54	0.42	1.78	12.62	25.49	0.19	10.1	99.16
403	Zimnyaya	44.92	0.46	0.84	18.92	27.05	0.2	7.39	99.82
404	Zimnyaya	44.09	0.46	0.87	20.61	26.7	0.19	7.16	100.1
405	Zimnyaya	44.19	0.44	0.88	20.18	27.12	0.2	6.97	99.99
406	Zimnyaya	44.44	0.46	0.9	19.56	27.58	0.22	6.82	99.98
407	Zimnyaya	45.84	0.49	0.99	17.25	27.33	0.23	7.66	99.79
408	Zimnyaya	44.63	0.52	0.88	19.44	27.09	0.23	7.19	100
409	Zimnyaya	47.93	0.4	1.48	13.48	26.73	0.22	9.08	99.35
410	Zimnyaya	45.38	0.62	0.79	18.26	27	0.2	7.63	99.88
411	Zimnyaya	44.67	0.51	0.85	19.58	27.08	0.19	7.25	100.14
412	Zimnyaya	47.81	0.36	1.51	14.12	26.48	0.18	9.16	99.63
413	Zimnyaya	44.77	0.47	0.88	19.69	26.74	0.22	7.46	100.22
414	Zimnyaya	46.56	0.24	1.36	16.77	26.06	0.19	8.76	99.94
415	Zimnyaya	45.39	0.5	0.84	18.25	27.87	0.23	7.13	100.21
416	Zimnyaya	49.94	0.42	2.79	10.4	24.09	0.23	11.56	99.45
417	Zimnyaya	45.16	0.47	0.87	18.92	27.31	0.19	7.35	100.28
418	Zimnyaya	46	0.52	0.95	16.65	27.81	0.18	7.5	99.61
419	Zimnyaya	51.63	0.36	4.8	7.53	18.64	0.24	15.48	98.71
420	Zimnyaya	45.65	3.8	1.46	14.1	25.53	0.22	8.6	99.39
421	Inter-Kosmos	42.53	0.31	2.13	21.66	26.83	0.18	6.3	98.32
422	Inter-Kosmos	42.6	0.32	2.2	21.65	27.13	0.19	6.16	98.47
423	Inter-Kosmos	42.93	0.29	2.17	21.12	27.49	0.24	6.1	98.7
424	Inter-Kosmos	43.01	0.28	2.24	20.54	27.76	0.22	6	98.55
425	Inter-Kosmos	43.09	0.33	2.26	21.91	27.13	0.21	6.4	99.46
426	Inter-Kosmos	43.11	0.31	2.21	21.6	27.3	0.2	6.32	99.49
427	Inter-Kosmos	43.16	0.32	2.21	21.61	27.52	0.25	6.19	99.42
428	Inter-Kosmos	43.19	0.34	2.18	21.18	27.42	0.22	6.28	99.14
429	Inter-Kosmos	43.2	0.3	2.2	21.67	27.52	0.22	6.23	99.71
430	Inter-Kosmos	43.31	0.29	2.19	20.42	28.04	0.21	6	98.97
431	Inter-Kosmos	43.39	0.34	2.21	21.29	27.98	0.23	6.06	99.94
432	Inter-Kosmos	43.42	0.33	2.23	20.67	27.87	0.24	6.13	99.39
433	Inter-Kosmos	43.5	0.32	2.19	21.17	27.68	0.22	6.29	99.7
434	Inter-Kosmos	43.5	0.29	2.23	21.01	28.2	0.24	5.99	99.73
435	Inter-Kosmos	44.28	0.44	0.88	19.52	27.73	0.21	6.66	98.22
436	Inter-Kosmos	44.37	0.46	0.89	19.37	28.13	0.21	6.48	98.42
437	Inter-Kosmos	44.42	0.49	0.92	19.6	27.82	0.18	6.7	98.72
438	Inter-Kosmos	44.65	0.47	0.9	18.99	27.76	0.19	6.84	98.64
439	Inter-Kosmos	44.66	0.5	0.84	18.51	28.49	0.2	6.43	98.21
440	Inter-Kosmos	44.69	0.47	0.93	18.28	28.48	0.21	6.45	98.26
441	Inter-Kosmos	44.9	0.45	0.88	18.53	28.27	0.21	6.67	98.66
442	Inter-Kosmos	44.93	0.52	0.96	19.88	28.34	0.21	6.65	100.08
443	Inter-Kosmos	44.94	0.51	0.98	18.4	27.36	0.2	7.21	98.09
444	Inter-Kosmos	44.95	0.48	0.91	18.45	27.48	0.21	7.14	98.43
445	Inter-Kosmos	44.96	0.49	0.94	18.16	27.53	0.22	7.11	98
446	Inter-Kosmos	45.08	0.5	0.92	18.09	27.56	0.21	7.16	98.27
447	Inter-Kosmos	45.1	0.53	0.94	19.46	27.84	0.22	7.01	99.9
448	Inter-Kosmos	45.11	0.45	0.92	18.21	28.29	0.19	6.78	98.66
449	Inter-Kosmos	45.13	0.48	0.92	19.61	27.78	0.2	7.07	99.82
450	Inter-Kosmos	45.18	0.5	0.94	18.25	27.81	0.21	7.07	98.65
451	Inter-Kosmos	45.19	0.45	0.97	19.07	28.61	0.22	6.62	99.86
452	Inter-Kosmos	45.2	0.54	0.9	18.3	27.89	0.2	7.04	98.58
453	Inter-Kosmos	45.2	0.5	0.96	17.7	27.62	0.19	7.2	98.06
454	Inter-Kosmos	45.22	0.46	0.93	19.21	28.75	0.15	6.6	99.97
455	Inter-Kosmos	45.28	0.49	0.92	17.56	27.59	0.18	7.26	98.11
456	Inter-Kosmos	45.28	0.5	0.95	18.51	27.38	0.18	7.38	98.85
457	Inter-Kosmos	45.28	0.49	0.95	17.76	28.17	0.21	6.92	98.39
458	Inter-Kosmos	45.33	0.46	0.98	17.33	28.14	0.21	6.96	98
459	Inter-Kosmos	45.36	0.49	0.95	19.59	28.55	0.22	6.74	100.4
460	Inter-Kosmos	45.36	0.48	0.93	18.08	27.37	0.17	7.43	98.44
461	Inter-Kosmos	45.36	0.51	0.95	17.95	28.11	0.22	6.99	98.72
462	Inter-Kosmos	45.39	0.47	0.92	19.39	28.35	0.22	6.87	99.99
463	Inter-Kosmos	45.4	0.47	0.93	17.29	27.9	0.19	7.14	98.17
464	Inter-Kosmos	45.4	0.46	1	17.76	28.28	0.21	6.92	98.71
465	Inter-Kosmos	45.42	0.49	0.96	19.01	28.08	0.21	7.04	99.81
466	Inter-Kosmos	45.48	0.48	0.98	17.78	28.41	0.2	6.89	98.87
467	Inter-Kosmos	45.48	0.5	0.94	17.78	27.86	0.18	7.21	98.81
468	Inter-Kosmos	45.53	0.5	0.9	18.64	28.87	0.2	6.66	99.73
469	Inter-Kosmos	45.54	0.49	0.98	17.04	27.63	0.22	7.35	98.17
470	Inter-Kosmos	45.68	0.47	0.97	17.47	28.06	0.21	7.18	98.89
471	Inter-Kosmos	45.68	0.47	0.93	18.94	28.57	0.22	6.89	100.36
472	Inter-Kosmos	45.7	0.47	0.97	17.18	28.6	0.23	6.88	98.65
473	Inter-Kosmos	45.77	0.52	0.94	18.53	28.23	0.21	7.13	99.8
474	Inter-Kosmos	45.79	0.51	0.97	18.27	28.35	0.18	7.09	99.8
475	Inter-Kosmos	45.8	0.52	0.89	18.73	27.85	0.18	7.38	99.94
476	Inter-Kosmos	45.8	0.48	0.81	16.88	28.55	0.17	6.99	98.42
477	Inter-Kosmos	45.82	0.6	0.98	18.71	23.85	0.2	9.62	98.31
478	Inter-Kosmos	46.01	0.46	0.94	17.97	28.5	0.21	7.1	99.92
479	Inter-Kosmos	46.02	0.54	0.96	17.99	28.02	0.2	7.38	99.85
480	Inter-Kosmos	46.11	0.47	0.98	18.13	28.68	0.2	7.06	100.44
481	Inter-Kosmos	46.3	0.47	0.95	17.43	28.4	0.18	7.32	99.89
482	Inter-Kosmos	41.9	0.02	0	20.31	35.38	0	1.29	99.12
483	Inter-Kosmos	41.97	0.16	0.02	21.86	34.01	0.04	2.07	98.28
484	Inter-Kosmos	43.15	0.02	0.02	18.19	36.67	0.03	1.18	97.87
485	Inter-Kosmos	43.86	0.45	0.86	20.94	26.69	0.18	7.05	98.29
486	Inter-Kosmos	50.58	0.26	0.04	12.16	26.17	0.52	10.54	101.6
487	Debyut	43.27	0.44	0.79	19.99	27.1	0.12	6.56	96.45
488	Debyut	43.45	0.44	0.81	19.96	27.13	0.09	6.65	96.89
489	Debyut	43.53	0.42	0.81	20.28	26.9	0.07	6.83	97.11
490	Debyut	43.57	0.46	0.83	20.02	26.99	0.13	6.76	97.23
491	Debyut	43.67	0.44	0.83	20.22	25.05	0.16	7.89	96.59
492	Debyut	43.75	0.43	0.87	19.79	27.48	0.16	6.56	97.45
493	Debyut	43.82	0.46	0.84	20.58	27.29	0.15	6.71	98.08
494	Debyut	43.83	0.48	0.85	20.91	26.86	0.16	6.95	98.29
495	Debyut	43.93	0.44	0.85	19.65	27.92	0.12	6.43	97.9
496	Debyut	43.96	0.43	0.87	20.23	27.57	0.14	6.63	97.99
497	Debyut	44.02	0.41	0.86	19.7	27.62	0.13	6.64	97.81
498	Debyut	46.73	0.03	0	10.28	40.31	0.01	0.95	97.94
499	Debyut	48.06	0.37	1.71	13.73	26.12	0.22	9.47	98.72
500	Debyut	49.78	0.7	1.03	11.71	25.06	0.14	10.97	98.73
501	Debyut	49.79	0.68	0.97	11.42	25.36	0.17	10.79	98.4
502	Debyut	50.33	0.57	0.68	10.63	23.92	0.16	11.88	97.56
503	Debyut	50.71	0.47	4.51	6.96	20.67	0.11	13.92	97.61
504	Debyut	50.82	0.64	5.32	6.89	21.11	0.14	13.71	98.52
505	Debyut	51.05	0.44	4.91	6.9	21.32	0.13	13.72	98.19
506	Debyut	51.28	0.52	4.8	7.46	20.07	0.17	14.51	98.79
507	Vimpel	44.05	0.48	0.92	20.04	27.05	0.21	6.93	98.03
508	Vimpel	44.14	0.5	0.9	19.7	27.36	0.21	6.8	98.18
509	Vimpel	44.16	0.49	0.92	20.08	27.17	0.24	6.9	98.33
510	Vimpel	44.24	0.49	0.91	19.52	27.39	0.22	6.83	98.01
511	Vimpel	44.3	0.52	0.91	20.49	27.14	0.2	7.01	99.1
512	Vimpel	44.36	0.45	0.91	19.72	27.47	0.24	6.83	98.25
513	Vimpel	44.36	0.46	0.92	19.55	27.74	0.24	6.68	98.25
514	Vimpel	44.38	0.46	0.95	19.58	27.23	0.21	6.99	98.22
515	Vimpel	44.43	0.51	0.96	20.04	27.5	0.22	6.86	98.99
516	Vimpel	44.43	0.48	0.93	19.71	27.73	0.22	6.73	98.59
517	Vimpel	44.5	0.44	0.9	19.27	27.67	0.22	6.8	98.23
518	Vimpel	44.53	0.49	0.92	18.99	27.77	0.22	6.76	98.06
519	Vimpel	44.59	0.5	0.91	20.17	27.28	0.19	7.08	99.3
520	Vimpel	44.66	0.5	0.94	19.81	27.5	0.22	6.98	98.93
521	Vimpel	44.76	0.51	0.92	20.27	27.82	0.21	6.85	99.69
522	Vimpel	44.84	0.48	0.9	20.17	27.61	0.24	6.99	99.59
523	Vimpel	44.85	0.48	0.91	19.22	27.9	0.18	6.87	98.67
524	Vimpel	44.94	0.5	0.94	19.25	27.77	0.24	6.96	98.94
525	Vimpel	45.02	0.54	0.94	18.88	28.21	0.22	6.76	98.97
526	Vimpel	45.04	0.43	0.91	19.37	26.87	0.19	7.54	98.82
527	Vimpel	45.06	0.47	0.93	20.25	28.07	0.2	6.87	100.26
528	Vimpel	45.17	0.48	0.95	19.72	23.34	0.25	9.55	98.01
529	Vimpel	45.19	0.47	0.98	19.65	28.18	0.23	6.86	99.89
530	Vimpel	45.33	0.47	0.92	19.32	28.44	0.22	6.79	99.92
531	Vimpel	45.36	0.47	0.94	19.22	28.16	0.22	6.96	99.67
532	Vimpel	45.47	0.47	0.75	17.6	27.67	0.24	7.28	98.3
533	Vimpel	45.51	0.48	0.92	19.24	28.23	0.21	7	99.79
534	Vimpel	45.76	0.52	0.98	19.59	28.34	0.24	7.05	100.8
535	Vimpel	46.25	0.46	0.93	16.34	28.22	0.2	7.39	98.44
536	Poiskovaya	44.87	0.44	1.21	20.22	26	0.21	7.93	100.88
537	Poiskovaya	44.94	0.5	0.8	19.53	27.66	0.2	7.04	100.67
538	Poiskovaya	44.99	0.54	1.15	19.93	25.58	0.26	8.2	100.65
539	Poiskovaya	45.11	0.49	0.89	19.58	27.3	0.23	7.31	100.91
540	Poiskovaya	45.12	0.5	0.86	19.24	27.86	0.25	6.99	100.82
541	Poiskovaya	45.31	0.45	1.19	19.35	25.99	0.24	8.14	100.67
542	Poiskovaya	45.61	0.51	0.89	18.56	27.57	0.2	7.43	100.77
543	Poiskovaya	45.67	0.48	2.6	17.85	25.08	0.28	8.81	100.77
544	Poiskovaya	45.73	0.54	2.52	17.22	24.92	0.23	8.96	100.12
545	Poiskovaya	45.93	0.5	1.37	18.18	25.87	0.28	8.5	100.62
546	Poiskovaya	45.99	0.63	2.64	16.93	25.27	0.25	8.88	100.6
547	Poiskovaya	46.01	0.54	1.03	18.14	27.53	0.19	7.66	101.1
548	Poiskovaya	46.37	0.49	1.45	17.5	26.11	0.25	8.6	100.77
549	Poiskovaya	47.47	0.29	1.96	15.46	26.22	0.31	9.06	100.77
550	Poiskovaya	47.54	0.59	0.82	16.13	26.23	0.22	9.14	100.68
551	Poiskovaya	47.57	0.56	1	16.1	26.54	0.24	8.97	100.98
552	Poiskovaya	47.72	0.53	1	15.83	26.55	0.23	9.05	100.91
553	Poiskovaya	47.94	0.5	0.82	15.92	26.79	0.25	9.01	101.24
554	Poiskovaya	48.14	0.58	0.84	15.94	26.82	0.21	9.12	101.65
555	Poiskovaya	48.45	0.71	0.03	15.71	27.53	0.19	8.89	101.5
556	Poiskovaya	48.58	0.47	0.92	15.33	25.34	0.21	10.17	101.03
557	Poiskovaya	48.87	0.51	0.52	14.55	26.02	0.24	9.92	100.63
558	Poiskovaya	49.09	0.81	0.16	14.86	26.48	0.16	9.82	101.38
559	Poiskovaya	49.28	0.79	0.09	13.96	27.21	0.2	9.48	101.01
560	Poiskovaya	49.35	0.65	0.34	15.09	25.32	0.26	10.54	101.55
561	Poiskovaya	49.49	0.84	0.25	14.27	24.68	0.16	11.03	100.72
562	Poiskovaya	49.67	0.87	0.26	14.54	24.62	0.22	11.12	101.3
563	Poiskovaya	49.86	0.53	0.48	13.07	26.03	0.23	10.42	100.62
564	Poiskovaya	49.88	0.45	1.95	11.33	25.98	0.24	10.45	100.29
565	Poiskovaya	49.91	0.48	0.35	13.64	26.3	0.22	10.3	101.2
566	Poiskovaya	50.09	0.7	0.34	12.47	26.94	0.22	10.03	100.79
567	Poiskovaya	50.19	0.41	2.03	11.86	25.78	0.24	10.72	101.23
568	Poiskovaya	50.55	0.5	2.66	11	23.48	0.23	12.2	100.61
569	Poiskovaya	50.69	0.73	1.71	12.31	22.54	0.27	12.77	101.02
570	Poiskovaya	52.42	0.83	0.45	9.8	25.82	0.21	11.84	101.37
571	Poiskovaya	53.39	0.63	3.69	6.1	21.3	0.2	14.87	100.18
572	Poiskovaya	53.47	0.65	2.49	6.7	21.4	0.26	14.82	99.79
573	Poiskovaya	45.13	0.51	0.75	19.44	27.55	0.19	7.2	100.78
574	Poiskovaya	45.31	0.52	0.81	19.64	28.5	0.19	6.76	101.73
575	Poiskovaya	45.32	0.36	4.16	17.17	25.37	0.26	8.48	101.12
576	Poiskovaya	45.48	0.47	0.8	20.33	27.8	0.24	7.21	102.33
577	Poiskovaya	45.58	0.56	2.51	18.15	25.1	0.23	8.78	100.91
578	Poiskovaya	45.62	0.56	3.36	16.86	25.3	0.25	8.68	100.63
579	Poiskovaya	45.9	0.58	1.26	18.86	25.9	0.22	8.5	101.22
580	Poiskovaya	45.94	0.51	0.81	18.23	28.24	0.23	7.2	101.17
581	Poiskovaya	46.35	0.5	1.22	17.86	26.25	0.24	8.52	100.94
582	Poiskovaya	46.5	0.19	2.03	17.3	26.38	0.3	8.49	101.18
583	Poiskovaya	46.97	0.22	2.18	16.34	26.4	0.29	8.72	101.12
584	Poiskovaya	47.46	0.29	2.11	16.16	26.38	0.27	8.99	101.66
585	Poiskovaya	47.61	0.25	2.07	16.14	26.74	0.26	8.87	101.94
586	Poiskovaya	47.74	0.55	1.06	15.98	26.51	0.27	9.06	101.16
587	Poiskovaya	47.87	0.58	0.96	15.31	27.24	0.26	8.72	100.93
588	Poiskovaya	47.95	0.51	0.88	16.63	26.51	0.24	9.18	101.9
589	Poiskovaya	47.95	0.27	2.28	14.55	27.2	0.3	8.76	101.31
590	Poiskovaya	49.26	0.51	0.08	13.26	27.09	0.21	9.53	99.95
591	Poiskovaya	49.32	0.38	1.63	11.93	27.01	0.26	9.58	100.1
592	Poiskovaya	49.47	0.42	1.64	12.61	26.76	0.29	9.78	100.96
593	Poiskovaya	49.5	0.75	0.08	13.51	28.41	0.2	8.92	101.36
594	Poiskovaya	49.58	0.68	0.12	14.36	27.18	0.22	9.64	101.78
595	Poiskovaya	49.65	0.48	0.23	14.06	27	0.19	9.79	101.4
596	Poiskovaya	49.8	0.38	1.66	12.83	26.68	0.32	9.97	101.65
597	Poiskovaya	51.25	0.43	2.47	9.94	24.63	0.31	11.86	100.89
598	Poiskovaya	54.12	0.67	2.51	6.13	21.2	0.26	15.26	100.15

## Sheet: Cr-diopside + PTdata
Composition of Cr-diopside from the Upper Muna field (+PT-estimations), wt%.
Pipe/NAME	legkaya	legkaya	legkaya	legkaya	legkaya	legkaya	Zimnaya	Zimnaya	Zimnaya	Zimnaya	Zimnaya	Zimnaya	Zimnaya	Zimnaya	325let	Deimos	Deimos	7D-13\120	11D\75	11D\75	Zapolarnaya 102-2\157	Zapolarnaya 102-2\157	Zapolarnaya 102-2\157	Zapolarnaya 102-2\157	Zapolarnaya 102-2\157	Zapolarnaya 102-2\157	Zapolarnaya 102-2\157	Zapolarnaya 102-2\157	Zapolarnaya 102-2\157	Zapolarnaya 102-2\157	Zapolarnaya 119	Zapolarnaya 119	Zapolarnaya 119	Zapolarnaya 119	Zapolarnaya 119	Zapolarnaya 119	Zapolarnaya 119	Zapolarnaya 119	Zapolarnaya 119	Zapolarnaya 119	Zapolarnaya 119	Zapolarnaya 119	Zapolarnaya 119	Zapolarnaya 101\105	Zapolarnaya 102-2\156	Zapolarnaya 102-2\156	Zapolarnaya 102-2\156	Zapolarnaya 102-2\156	Zapolarnaya 107\87
DISCRIPTION	macrocryst	macrocryst	macrocryst	macrocryst	macrocryst	macrocryst	macrocryst	macrocryst	macrocryst	macrocryst	macrocryst	macrocryst	macrocryst	macrocryst	macrocryst	macrocryst	macrocryst	macrocryst	macrocryst	macrocryst	macrocryst	macrocryst	macrocryst	macrocryst	macrocryst	macrocryst	macrocryst	macrocryst	macrocryst	macrocryst	macrocryst	macrocryst	macrocryst	macrocryst	macrocryst	macrocryst	macrocryst	macrocryst	macrocryst	macrocryst	macrocryst	macrocryst	macrocryst	macrocryst	macrocryst	macrocryst	macrocryst	macrocryst	macrocryst
SiO2	52.895	53.414	53.43	53.709	53.927	54.594	53.313	53.529	53.806	53.952	54.063	54.079	54.136	54.28	53.906	55.305	54.623	54.429	54.873	52.449	51.469	54.184	53.897	54.394	53.836	52.477	52.937	52.691	52.267	52.225	54.598	52.839	54.091	51.955	54.151	53.588	53.516	54.823	54.089	54.886	54.799	54.175	54.053	55.4	54.965	54.55	55.322	54.732	53.851
TiO2	0.33	0.35	0.243	0.276	0.164	0.294	0.227	0.216	0.111	0.281	0.248	0.338	0.108	0.068	0.287	0.232	0.23	0.36	0.174	0.113	0.511	0.281	0.198	0.26	0.355	0.43	0.426	0.464	0.523	0.414	0.298	0.477	0.306	0.43	0.289	0.258	0.297	0.22	0.159	0.004	0.284	0.22	0.338	0	0.357	0.278	0.049	0.287	0.261
Al2O3	1.761	2.02	2.057	1.715	2.038	2.046	1.249	1.673	1.681	1.627	1.701	1.825	1.752	2.024	1.848	1.47	2.088	1.845	2.154	1.094	3.594	1.348	1.836	1.757	0.736	3.749	3.515	3.478	3.69	3.716	1.807	3.724	1.336	2.753	1.727	1.48	1.693	1.953	2.4	1.049	1.431	2.106	1.393	1.62	1.883	2.122	2.226	1.289	1.425
Cr2O3	2.914	4.354	2.297	2.883	2.31	4.415	2.211	1.248	1.43	1.265	1.193	1.599	1.767	0.076	2.586	0.962	2.612	1.361	2.024	2.333	0.48	1.508	2.692	2.698	2.771	0.403	0.49	0.469	0.461	0.508	0.902	0.414	0.942	0.41	0.669	0.691	0.961	0.464	0.821	0.816	1.173	1.287	1.622	1.87	1.68756	1.40924	1.24166	0.9751	0.991
FeO	1.743	0.898	2.812	1.762	2.645	0.793	2.667	2.397	2.837	2.643	2.409	2.914	2.754	10.255	2.515	2.707	3.104	2.714	2.5551	2.21136	3.55992	2.98272	2.29944	1.9968	1.86784	3.49648	3.68992	3.88752	3.66704	3.60152	3.69616	3.52144	3.38832	3.4372	3.68264	4.30352	3.9416	4.36904	5.57232	2.85896	3.39976	5.62432	3.51416	2.13	2.625	2.257	2.637	2.634	3.06204
MnO	0.089	0.098	0.09	0.12	0.085	0.101	0.092	0.101	0.093	0.103	0.094	0.118	0.092	0.124	0.064	0.108	0.085	0.085	0.104	0.097	0.029	0.093	0.06	0.094	0.072	0.036	0.047	0.016	0.035	0.028	0.119	0.043	0.132	0.06	0.13	0.105	0.129	0.12	0.089	0.087	0.09	0.142	0.11	0.1	0.084	0.086	0.05	0.102	0.099
MgO	17.023	18.041	15.533	16.46	15.757	17.736	16.613	16.653	17.763	17.213	17.279	17.097	17.714	31.166	16.036	18.347	15.515	18.694	16.938	18.42	13.911	17.586	15.518	16.354	16.438	14.368	14.939	14.798	14.459	14.397	17.553	14.712	18.155	15.524	18.053	17.98	18.345	20.089	15.964	18.131	17.944	15.382	17.88	15.89	16.789	16.953	16.671	17.555	17.6093
CaO	18.413	16.61	18.236	18.924	18.919	16.733	19.436	20.222	18.203	19.761	20.106	18.382	18.232	0.228	19.023	18.899	18.319	17.764	17.561	19.825	21.904	19.161	20.05	19.728	21.737	22.067	21.868	20.88	21.742	21.833	18.916	22.085	19.28	22.607	19.128	18.571	17.596	15.776	19.007	20.668	18.994	18.461	18.264	20.26	19.508	20.298	20.016	19.937	18.596
Na2O	2.021	1.652	2.376	1.622	2.436	1.728	1.57	1.533	1.697	1.383	1.484	1.858	1.732	0.011	2.415	1.139	2.232	1.744	2.002	1.617	1.507	1.447	2.377	2.012	1.423	1.704	1.685	1.74	1.765	1.813	1.741	1.798	1.434	1.124	1.483	1.37	1.609	1.358	2.39	0.979	1.335	2.217	1.783	1.2	2.391	2.213	2.47	1.474	1.498
total	97.189	97.437	97.074	97.471	98.281	98.44	97.378	97.572	97.621	98.228	98.577	98.21	98.287	98.232	98.68	99.169	98.808	98.996	98.3851	98.1594	96.9649	98.5907	98.9274	99.2938	99.2358	98.7305	99.5969	98.4235	98.609	98.5355	99.6302	99.6134	99.0643	98.3002	99.3126	98.3465	98.0876	99.172	100.491	99.479	99.4498	99.6143	98.9572	98.47	100.29	100.166	100.683	98.9851	97.3923
No Oxyg	4	4	4	4	4	4	4	4	4	4	4	4	4	4	4	4	4	4	4	4	4	4	4	4	4	4	4	4	4	4	4	4	4	4	4	4	4	4	4	4	4	4	4	4	4	4	4	4	4
Si	1.96573	1.96358	1.99106	1.98623	1.98691	1.98194	1.98415	1.98394	1.98638	1.98386	1.9809	1.98688	1.98509	1.94171	1.97987	2.00191	1.9988	1.97675	2.0021	1.94295	1.93861	1.98618	1.97881	1.98156	1.97456	1.93913	1.93947	1.94952	1.93527	1.93557	1.98273	1.93565	1.9768	1.93276	1.97372	1.97601	1.97262	1.98273	1.9687	1.99361	1.98957	1.98671	1.97775	2.02307	1.98299	1.97091	1.98686	1.99535	1.99374
Ti	0.00922391	0.00967726	0.00681077	0.00767688	0.00454472	0.0080276	0.00635418	0.00602122	0.00308209	0.00777144	0.00683447	0.00934011	0.00297859	0.00182956	0.00792819	0.00631627	0.00633015	0.00983368	0.00477495	0.00314843	0.0144763	0.00774724	0.00546761	0.00712398	0.00979305	0.0119508	0.0117389	0.0129123	0.0145649	0.0115404	0.00813944	0.0131427	0.00841108	0.0120313	0.00792262	0.00715539	0.00823396	0.00598434	0.0043527	0.000109278	0.00775526	0.00606808	0.00930167	0	0.00968711	0.00755455	0.0013236	0.00786957	0.00726789
Al	0.0771256	0.0875133	0.0903364	0.0747442	0.0884923	0.0875351	0.0547815	0.0730743	0.0731355	0.0705052	0.0734507	0.0790199	0.075711	0.0853268	0.0799894	0.0627087	0.090044	0.0789675	0.0926198	0.0477608	0.159534	0.0582329	0.0794407	0.0754326	0.0318131	0.163261	0.151768	0.151653	0.161016	0.162306	0.0773347	0.160773	0.0575407	0.120695	0.0741825	0.0643152	0.073544	0.0832404	0.102946	0.044904	0.0612288	0.0910175	0.0600667	0.0697183	0.0800598	0.090354	0.0942158	0.055381	0.0621757
Cr	0.0856138	0.126539	0.0676712	0.0842894	0.0672866	0.126713	0.0650542	0.0365678	0.0417361	0.0367738	0.0345579	0.0464448	0.0512244	0.00214933	0.0750885	0.0275296	0.0755635	0.0390773	0.0583826	0.0683257	0.0142933	0.0437013	0.0781377	0.0777041	0.0803487	0.011773	0.0141927	0.0137186	0.0134946	0.0148847	0.0258963	0.01199	0.0272166	0.0120581	0.0192775	0.0201439	0.0280046	0.0132667	0.0236242	0.0234323	0.0336689	0.037313	0.046919	0.0539869	0.0481325	0.0402533	0.0352546	0.0281042	0.0290064
Fe(ii)	0.0541639	0.027604	0.0876227	0.054487	0.0814892	0.0240726	0.082998	0.0742865	0.0875776	0.0812651	0.0738077	0.0895233	0.0844427	0.30675	0.0772398	0.0819355	0.0949771	0.0824204	0.0779541	0.0684994	0.112121	0.0914248	0.0705936	0.0608268	0.0572849	0.108037	0.113043	0.120273	0.113536	0.111614	0.112238	0.107869	0.103544	0.10692	0.112238	0.132693	0.121489	0.132127	0.169593	0.0868341	0.103214	0.172468	0.107517	0.0650406	0.0791893	0.0681878	0.0791921	0.0802965	0.094796
Mn	0.00280116	0.00305111	0.0028404	0.0037584	0.00265234	0.00310532	0.0028998	0.00317029	0.00290772	0.00320759	0.00291694	0.00367168	0.00285707	0.00375669	0.00199076	0.00331088	0.00263422	0.00261445	0.00321366	0.00304323	0.000925086	0.00288716	0.00186565	0.00290017	0.0022365	0.00112662	0.00145835	0.000501361	0.00109754	0.000878875	0.00365992	0.00133407	0.00408556	0.00189035	0.00401293	0.00327906	0.00402707	0.00367554	0.00274346	0.00267631	0.00276737	0.00441025	0.00340866	0.00309272	0.00256656	0.00263154	0.00152082	0.00314932	0.0031042
Mg	0.943127	0.988731	0.862936	0.907482	0.865506	0.959903	0.921753	0.920145	0.977624	0.943594	0.943854	0.936458	0.968359	1.66208	0.878054	0.99008	0.84639	1.01216	0.92133	1.01728	0.781139	0.961038	0.849378	0.888191	0.898817	0.791514	0.815963	0.816244	0.798135	0.795476	0.950304	0.803469	0.989144	0.860954	0.980964	0.988408	1.0081	1.08314	0.866236	0.981806	0.971248	0.840958	0.975315	0.865069	0.902992	0.913153	0.892596	0.95412	0.971946
Ca	0.733087	0.65416	0.728031	0.749753	0.746778	0.650792	0.774944	0.802943	0.719939	0.778457	0.78924	0.723533	0.716228	0.00873779	0.748516	0.732894	0.718154	0.69117	0.686435	0.786791	0.883874	0.752469	0.788636	0.76995	0.85412	0.87358	0.858332	0.827646	0.862452	0.866893	0.735932	0.866746	0.754862	0.900983	0.746914	0.733633	0.694858	0.611252	0.741149	0.804266	0.738796	0.725293	0.71593	0.792617	0.753995	0.785683	0.770137	0.77868	0.737594
Na	0.145608	0.117736	0.171654	0.11629	0.174003	0.121618	0.113279	0.110151	0.121457	0.0985903	0.105415	0.132342	0.123126	0.000762862	0.171959	0.0799305	0.158342	0.122794	0.141612	0.11613	0.110044	0.102831	0.169191	0.1421	0.101184	0.122072	0.119683	0.12481	0.126697	0.130268	0.122573	0.127694	0.101601	0.0810637	0.104792	0.0979378	0.114981	0.095216	0.168646	0.0689398	0.0939671	0.15762	0.126477	0.0849555	0.167233	0.155011	0.171978	0.10418	0.107522
T(C)	1116	1291	1040	1109	984	1290	1079	1005	1236	1106	1071	1173	1219	1460	989	1252	1078	1282	1206	1137	378	1180	776	995	804		566	775	486	374	1222	412	1257	533	1227	1286	1324	1414		1156	1219	1176	1274	1069		944			1248
P(kb)	46.4	39.9	51.7	42	52.1	40.6	50.2	48.2	61	49.2	49.6	56.9	54.6	43.4	52.3	55.7	46.2	60.1	49.9	55.3	3.7	57.4	43.1	43.2	42.1		11.5	19.4	7.9	4.3	75.3	3.8	82.7	11.3	65.6	76.1	72.8	64.7		60.1	58.7	92.5	78.9	41.6		58.5			77.3
[truncated: 58 more columns]

## Sheet: Phlogopite
Composition of phlogopite from the Upper Muna field, wt%.
№	302/24im20-1c	302/24im20-1r	302/24im20-2	415/19im40-5	409/145im46-5	02/100im55-2	02/100im58-7	KM 1	NV 1	NV 2	NV 3	NV 4	NV 5	NV 6	NV 7	NV 8	NV 9	NV 10	NV 11	NV 12	NV 13	NV 14	NV 15	NV 16	NV 17	57G	59G	75G	82G	K-M 32	91G	90	90	92	92	92	93	94	95	96	96	97	98	99	100	100	ZP 101\257	ZP 101\257	ZP 101\257
Pipe	Komsomolskaya-M	Komsomolskaya-M	Komsomolskaya-M	Novinka	Novinka	Poiskovaya	Poiskovaya	Komsomolskaya-Magnitnaya	Novinka	Novinka	Novinka	Novinka	Novinka	Novinka	Novinka	Novinka	Novinka	Novinka	Novinka	Novinka	Novinka	Novinka	Novinka	Novinka	Novinka	Nv Phl	Nv Phl 15x10mm	Nv mega phl 35x25	Nv mega phl 16x9	K-M	Nv xen 21x12mm c phl	Zapolarnaya	Zapolarnaya	Zapolarnaya	Zapolarnaya	Zapolarnaya	Zapolarnaya	Zapolarnaya	Zapolarnaya	Zapolarnaya	Zapolarnaya	Zapolarnaya	Zapolarnaya	Zapolarnaya	Zapolarnaya	Zapolarnaya	Zapolarnaya	Zapolarnaya	Zapolarnaya
Source	groundmass	groundmass	groundmass	groundmass	groundmass	groundmass	groundmass	megacryst	megacryst	megacryst	megacryst	megacryst	megacryst	megacryst	megacryst	megacryst	megacryst	megacryst	megacryst	megacryst	megacryst	megacryst	megacryst	megacryst	megacryst	megacryst	megacryst	megacryst	megacryst	megacryst	megacryst	mega phl	mega phl	mega phl т2	mega phl т3 Na-альбит	mega phl т4 хлорит	mega phl	mega phl т3 Na-альбит	mega phl	mega phl	mega phl	mega phl	mega phl	mega phl	mega phl	mega phl	gar-phl peridotite	gar-phl peridotite	gar-phl peridotite
Comment								Phl	Nv Phl	Nv Phl 15x10mm	Nv mega phl 35x25	Nv mega phl 16x9	Nv xen 21x12mm c phl													phl	phl	phl	phl	phl 6x3mm	phl			Feldspar	Na-albite			Na-albite									Gr-Phl xen	Gr-Phl xen	Gr-Phl xen
SiO2	37.665	39.902	41.277	37.671	42.765	40.289	39.67	42.023	38.176	40.599	41.593	40.752	40.88	33.614	43.535	35.66	33.458	31.72	33.501	31.57	22.766	33.05	30.881	30.393	29.534	38.176	40.599	41.593	40.752	42.023	40.88	33.614	43.535	63.34	68.88	35.66	33.458	61.028	31.72	33.501	31.57	22.766	33.05	30.881	30.393	29.534	39.236	40.241	39.203
TiO2	1.598	0.901	0.937	0.369	0.621	0.383	1.575	0.44	0.687	0.791	0.761	0.674	0.605	3.488	0.058	3.77	3.821	3.544	3.533	3.584	3.032	3.692	4.05	3.834	4.151	0.687	0.791	0.761	0.674	0.44	0.605	3.488	0.058	0.9	0.09	3.77	3.821	0	3.544	3.533	3.584	3.032	3.692	4.05	3.834	4.151	0.73	0.735	0.689
Al2O3	14.692	15.24	14.665	19.317	13.429	12.485	11.104	11.02	10.11	10.799	11.523	11.518	12.358	12.405	15.055	13.78	12.358	11.552	12.186	11.703	8.036	11.952	11.956	11.112	11.026	10.11	10.799	11.523	11.518	11.02	12.358	12.405	15.055	18.96	19.01	13.78	12.358	16.151	11.552	12.186	11.703	8.036	11.952	11.956	11.112	11.026	10.518	10.973	10.674
FeO	8.99	3.997	4.228	2.641	4.737	4.987	7.078	5.41008	5.84562	6.63204	6.36582	6.51168	2.9937	19.2182	10.0953	17.9	19.4938	18.4257	19.2057	20.1833	35.8769	18.695	23.399	18.0086	17.6925	5.84562	6.63204	6.36582	6.51168	5.41008	2.9937	19.2182	10.0953	0.57	0.00	17.9	19.4938	0.22048	18.4257	19.2057	20.1833	35.8769	18.695	23.399	18.0086	17.6925	4.59784	4.5604	4.61344
MnO	0.115	0.07	0.068	0.034	0.05	0.024	0.069	0.044	0.055	0.043	0.059	0.022	0.034	0.111	0.012	0.08	0.175	0.137	0.127	0.129	0.105	0.154	0.118	0.102	0.131	0.055	0.043	0.059	0.022	0.044	0.034	0.111	0.012	0.01	0.05	0.08	0.175	0.029	0.137	0.127	0.129	0.105	0.154	0.118	0.102	0.131	0.023	0.02	0.038
MgO	23.522	25.181	25.127	24.15	25.277	25.118	24.573	24.0117	20.8508	23.0602	23.0381	23.0401	24.6581	12.188	12.387	14.24	11.285	12.248	13.097	11.774	8.143	11.373	11.141	12.502	11.706	20.8508	23.0602	23.0381	23.0401	24.0117	24.6581	12.188	12.387	0.00	0.00	14.24	11.285	0.351	12.248	13.097	11.774	8.143	11.373	11.141	12.502	11.706	26.6651	27.1435	26.5213
CaO	0	0	0	0	0.413	0	0	0.004	0.5	0.017	0.005	0.01	0	0.189	0.345	0.35	0.103	0.351	0.241	0.191	0.211	0.076	0.131	0.33	0.265	0.5	0.017	0.005	0.01	0.004	0	0.189	0.345	0.00	0.00	0.35	0.103	0.048	0.351	0.241	0.191	0.211	0.076	0.131	0.33	0.265	0.005	0	0.005
Na2O	0	0.004	0	0.007	0.003	0.015	0	0.12	0.356	0.176	0.201	0.153	0.092	0.191	0.104	0.67	0.05	0.168	0.092	0.159	0.159	0.073	0.126	0.149	0.156	0.356	0.176	0.201	0.153	0.12	0.092	0.191	0.104	0.54	12.07	0.67	0.05	8.463	0.168	0.092	0.159	0.159	0.073	0.126	0.149	0.156	0.126	0.054	0
K2O	8.381	9.346	9.767	9.798	9.28	10.093	9.115	11.097	9.134	10.389	10.963	11.047	11.096	7.079	4.516	6.94	8.601	6.789	6.47	6.978	5.427	9.032	7.095	6.261	6.269	9.134	10.389	10.963	11.047	11.097	11.096	7.079	4.516	13.02	0.11	6.94	8.601	3.964	6.789	6.47	6.978	5.427	9.032	7.095	6.261	6.269	10.902	10.679	10.969
BaO	4.055	0.335	2.064	0.014	0.417	1.208	3.289
F	1.384	0.386	1.265	0.174	0.368	0.299	0.71
Cr2O3	0.061	0	0.011	0.021	0.013	0	0.036	0.265	0.042	0.087	0.053	0.04	0.776	0	0.027	0	0	0	0	0.007	0.026	0	0.003	0.002	0.01	0.042	0.087	0.053	0.04	0.265	0.776	0	0.027	0.00	0.05	0.00	0	0.004	0	0	0.007	0.026	0	0.003	0.002	0.01	0.477	0.435	0.469
Li2O*	1.25785	1.89987	2.2945	1.25958	2.72156	2.01094	1.83329	2.5086	1.40451	2.09991	2.38519	2.14382	2.18056	0.095218	2.94254	0.68242	0.050446	0	0.062787	0	0	0	0	0	0	1.40451	2.09991	2.38519	2.14382	2.5086	2.18056	0.095218	2.94254	8.62658	10.2166	0.68242	0.050446	7.96304	0	0.062787	0	0	0	0	0	0	1.70873	1.99717	1.69926
H2O*	3.59376	4.14962	3.83229	4.19963	4.293	4.1056	3.88213	4.28206	3.83925	4.15874	4.26482	4.20441	4.25961	3.64785	4.08824	3.93695	3.63957	3.48463	3.65654	3.50459	3.00921	3.5819	3.54494	3.39276	3.31459	3.83925	4.15874	4.26482	4.20441	4.28206	4.25961	3.64785	4.08824	5.13005	5.55821	3.93695	3.63957	4.85559	3.48463	3.65654	3.50459	3.00921	3.5819	3.54494	3.39276	3.31459	4.16645	4.27041	4.1624
Subtotal	105.315	101.411	105.536	99.6552	104.388	101.018	102.934	101.225	91.0002	98.8519	101.212	100.116	99.933	92.2262	93.1651	98.0094	93.0348	88.4193	92.172	89.7829	86.7911	91.6789	92.4449	86.0864	84.2551	91.0002	98.8519	101.212	100.116	101.225	99.933	92.2262	93.1651	111.097	116.035	98.0094	93.0348	103.077	88.4193	92.172	89.7829	86.7911	91.6789	92.4449	86.0864	84.2551	99.1551	101.108	99.0434
O=F,Cl	0.582733	0.162525	0.532628	0.0732627	0.154946	0.125894	0.298945	0	0	0	0	0	0	0	0	0	0	0	0	0	0	0	0	0	0	0	0	0	0	0	0	0	0	0	0	0	0	0	0	0	0	0	0	0	0	0	0	0	0
Total	104.732	101.249	105.003	99.5819	104.233	100.892	102.635	101.225	91.0002	98.8519	101.212	100.116	99.933	92.2262	93.1651	98.0094	93.0348	88.4193	92.172	89.7829	86.7911	91.6789	92.4449	86.0864	84.2551	91.0002	98.8519	101.212	100.116	101.225	99.933	92.2262	93.1651	111.097	116.035	98.0094	93.0348	103.077	88.4193	92.172	89.7829	86.7911	91.6789	92.4449	86.0864	84.2551	99.1551	101.108	99.0434
No Oxyg	22	22	22	22	22	22	22	22	22	22	22	22	22	22	22	22	22	22	22	22	22	22	22	22	22	22	22	22	22	22	22	22	22	22	22	22	22	22	22	22	22	22	22	22	22	22	22	22	22
Si	5.31426	5.52242	5.58459	5.27514	5.74001	5.68793	5.63852	5.88464	5.96252	5.85382	5.84798	5.81207	5.75476	5.52547	6.3854	5.43135	5.51234	5.45836	5.49381	5.40161	4.53649	5.53278	5.22359	5.37164	5.34293	5.96252	5.85382	5.84798	5.81207	5.88464	5.75476	5.52547	6.3854	7.4036	7.43095	5.43135	5.51234	7.53656	5.45836	5.49381	5.40161	4.53649	5.53278	5.22359	5.37164	5.34293	5.64683	5.65048	5.64756
Al iv	2.44336	2.47758	2.33866	2.72486	2.12456	2.07758	1.86031	1.81893	1.8612	1.83531	1.90965	1.93625	2.05053	2.40352	1.6146	2.47388	2.39986	2.34309	2.35548	2.36019	1.88745	2.35839	2.38378	2.31488	2.35113	1.8612	1.83531	1.90965	1.93625	1.81893	2.05053	2.40352	1.6146	0.596404	0.569055	2.47388	2.39986	0.463442	2.34309	2.35548	2.36019	1.88745	2.35839	2.38378	2.31488	2.35113	1.78425	1.81612	1.81247
Al vi	0	0.00854123	0	0.4635	0	0	0	0	0	0	0	0	0	0	0.988147	0	0	0	0	0	0	0	0	0	0	0	0	0	0	0	0	0	0.988147	2.01579	1.84827	0	0	1.88752	0	0	0	0	0	0	0	0	0	0	0
Ti	0.169565	0.0937811	0.0953406	0.0388605	0.0626861	0.0406651	0.16836	0.0463384	0.0806959	0.0857741	0.0804685	0.0722931	0.0640511	0.431202	0.00639783	0.431841	0.473444	0.458647	0.435728	0.461182	0.454379	0.464825	0.515214	0.509614	0.564761	0.0806959	0.0857741	0.0804685	0.0722931	0.0463384	0.0640511	0.431202	0.00639783	0.0791157	0.00730212	0.431841	0.473444	0	0.458647	0.435728	0.461182	0.454379	0.464825	0.515214	0.509614	0.564761	0.079013	0.0776175	0.0746477
Cr	0.00680492	0	0.00117669	0.00232506	0.00137961	0	0.0040457	0.0293405	0.00518653	0.00991817	0.00589183	0.00451055	0.0863706	0	0.00313113	0	0	0	0	0.000946967	0.00409633	0	0.000401224	0.000279481	0.00143036	0.00518653	0.00991817	0.00589183	0.00451055	0.0293405	0.0863706	0	0.00313113	0	0.0042649	0	0	0.000390564	0	0	0.000946967	0.00409633	0	0.000401224	0.000279481	0.00143036	0.0542784	0.0482941	0.0534199
Fe	1.06082	0.462641	0.478402	0.309293	0.531745	0.58882	0.841374	0.633596	0.763564	0.799736	0.748541	0.776694	0.352452	2.64202	1.23835	2.28011	2.68601	2.65172	2.63403	2.88812	5.97893	2.61742	3.31016	2.66189	2.67683	0.763564	0.799736	0.748541	0.776694	0.633596	0.352452	2.64202	1.23835	0.0557205	0	2.28011	2.68601	0.0227713	2.65172	2.63403	2.88812	5.97893	2.61742	3.31016	2.66189	2.67683	0.553413	0.535544	0.55583
Mn	0.013744	0.00820624	0.00779297	0.00403289	0.00568467	0.00287005	0.00830736	0.00521911	0.00727634	0.00525174	0.00702666	0.00265776	0.00405421	0.0154555	0.00149088	0.0103211	0.0244222	0.0199692	0.0176413	0.018696	0.0177228	0.0218376	0.0169072	0.0152702	0.0200742	0.00727634	0.00525174	0.00702666	0.00265776	0.00521911	0.00405421	0.0154555	0.00149088	0.000990092	0.00456911	0.0103211	0.0244222	0.00303356	0.0199692	0.0176413	0.018696	0.0177228	0.0218376	0.0169072	0.0152702	0.0200742	0.00280388	0.0023788	0.00463699
Mg	4.9473	5.19514	5.06772	5.04119	5.05754	5.28618	5.20656	5.01241	4.85459	4.95651	4.82861	4.89842	5.17447	2.98656	2.70835	3.23315	2.77158	3.14184	3.20167	3.00305	2.41884	2.83816	2.80925	3.29384	3.15686	4.85459	4.95651	4.82861	4.89842	5.01241	5.17447	2.98656	2.70835	0	0	3.23315	2.77158	0.0646161	3.14184	3.20167	3.00305	2.41884	2.83816	2.80925	3.29384	3.15686	5.72074	5.68161	5.69542
Zn	0	0	0	0	0	0	0	0	0	0	0	0	0	0	0	0	0	0	0	0	0	0	0	0	0	0	0	0	0	0	0	0	0	0	0	0	0	0	0	0	0	0	0	0	0	0	0	0	0
Sn	0	0	0	0	0	0	0	0	0	0	0	0	0	0	0	0	0	0	0	0	0	0	0	0	0	0	0	0	0	0	0	0	0	0	0	0	0	0	0	0	0	0	0	0	0	0	0	0	0
Ga	0	0	0	0	0	0	0	0	0	0	0	0	0	0	0	0	0	0	0	0	0	0	0	0	0	0	0	0	0	0	0	0	0	0	0	0	0	0	0	0	0	0	0	0	0	0	0	0	0
Ni	0	0	0	0	0	0	0	0	0	0	0	0	0	0	0	0	0	0	0	0	0	0	0	0	0	0	0	0	0	0	0	0	0	0	0	0	0	0	0	0	0	0	0	0	0	0	0	0	0
Cu	0	0	0	0	0	0	0	0	0	0	0	0	0	0	0	0	0	0	0	0	0	0	0	0	0	0	0	0	0	0	0	0	0	0	0	0	0	0	0	0	0	0	0	0	0	0	0	0	0
Li*	0.713817	1.05758	1.2486	0.709419	1.46924	1.14188	1.04806	1.41292	0.8823	1.2178	1.34884	1.22977	1.23463	0.0629535	1.7359	0.418052	0.0334283	0	0.0414131	0	0	0	0	0	0	0.8823	1.2178	1.34884	1.22977	1.41292	1.23463	0.0629535	1.7359	4.0556	4.4331	0.418052	0.0334283	3.95525	0	0.0414131	0	0	0	0	0	0	0.989113	1.12793	0.984586
Ca	0	0	0	0	0.0593975	0	0	0.000600188	0.0836765	0.00262644	0.000753269	0.00152818	0	0.0332893	0.0542204	0.0571201	0.0181831	0.0647188	0.0423474	0.0350168	0.0450516	0.0136326	0.0237434	0.0624945	0.0513685	0.0836765	0.00262644	0.000753269	0.00152818	0.000600188	0	0.0332893	0.0542204	0	0	0.0571201	0.0181831	0.00635154	0.0647188	0.0423474	0.0350168	0.0450516	0.0136326	0.0237434	0.0624945	0.0513685	0.000771053	0	0.000771802
Na	0	0.00107343	0	0.00190066	0.000780775	0.00410619	0	0.0325833	0.107813	0.0492059	0.0547977	0.042311	0.0251122	0.0608784	0.0295776	0.197871	0.015973	0.0560556	0.0292539	0.0527505	0.0614343	0.023696	0.0413265	0.0510623	0.054722	0.107813	0.0492059	0.0547977	0.042311	0.0325833	0.0251122	0.0608784	0.0295776	0.122388	2.52487	0.197871	0.015973	2.02651	0.0560556	0.0292539	0.0527505	0.0614343	0.023696	0.0413265	0.0510623	0.054722	0.0351618	0.0147025	0
K	1.50831	1.64987	1.68552	1.75006	1.58877	1.81751	1.65253	1.98211	1.81966	1.91068	1.96609	2.00963	1.99238	1.48426	0.844875	1.34827	1.80748	1.49013	1.35335	1.52289	1.37937	1.92861	1.5308	1.41145	1.44659	1.81966	1.91068	1.96609	2.00963	1.98211	1.99238	1.48426	0.844875	1.94118	0.0151368	1.34827	1.80748	0.624405	1.49013	1.35335	1.52289	1.37937	1.92861	1.5308	1.41145	1.44659	2.00131	1.91265	2.01557
Sr	0	0	0	0	0	0	0	0	0	0	0	0	0	0	0	0	0	0	0	0	0	0	0	0	0	0	0	0	0	0	0	0	0	0	0	0	0	0	0	0	0	0	0	0	0	0	0	0	0
Ba	0.224174	0.0181664	0.109416	0.000768147	0.0219306	0.0668228	0.183171	0	0	0	0	0	0	0	0	0	0	0	0	0	0	0	0	0	0	0	0	0	0	0	0	0	0	0	0	0	0	0	0	0	0	0	0	0	0	0	0	0	0
OH*	3.38243	3.83105	3.45872	3.92294	3.84379	3.8665	3.68084	4	4	4	4	4	4	4	4	4	4	4	4	4	4	4	4	4	4	4	4	4	4	4	4	4	4	4	4	4	4	4	4	4	4	4	4	4	4	4	4	4	4
F	0.617575	0.168955	0.54128	0.0770592	0.156214	0.133502	0.319161	0	0	0	0	0	0	0	0	0	0	0	0	0	0	0	0	0	0	0	0	0	0	0	0	0	0	0	0	0	0	0	0	0	0	0	0	0	0	0	0	0	0
TOTAL	20.4022	20.495	20.6172	20.3213	20.6637	20.7144	20.6112	20.8587	20.4285	20.7266	20.7986	20.7861	20.7388	19.6456	19.6104	19.882	19.7427	19.6845	19.6047	19.7445	20.7838	19.7994	19.8552	19.6924	19.6667	20.4285	20.7266	20.7986	20.7861	20.8587	20.7388	19.6456	19.6104	20.2708	20.8375	19.882	19.7427	20.5909	19.6845	19.6047	19.7445	20.7838	19.7994	19.8552	19.6924	19.6667	20.8677	20.8673	20.8449
Y total	6.91205	6.82589	6.89903	6.56862	7.12827	7.06041	7.27671	7.13982	6.59361	7.07499	7.01937	6.98434	6.91602	6.13819	6.68177	6.37347	5.98888	6.27218	6.33049	6.372	8.87397	5.94224	6.65194	6.48089	6.41995	6.59361	7.07499	7.01937	6.98434	7.13982	6.91602	6.13819	6.68177	6.20721	6.2975	6.37347	5.98888	5.93358	6.27218	6.33049	6.372	8.87397	5.94224	6.65194	6.48089	6.41995	7.39936	7.47338	7.36854
X total	1.73248	1.66911	1.79493	1.75273	1.67088	1.88844	1.8357	2.01529	2.01115	1.96251	2.02164	2.05346	2.01749	1.57843	0.928673	1.60326	1.84164	1.6109	1.42495	1.61066	1.48586	1.96594	1.59587	1.52501	1.55268	2.01115	1.96251	2.02164	2.05346	2.01529	2.01749	1.57843	0.928673	2.06356	2.54001	1.60326	1.84164	2.65727	1.6109	1.42495	1.61066	1.48586	1.96594	1.59587	1.52501	1.55268	2.03725	1.92736	2.01634
Al total	2.44336	2.48612	2.33866	3.18837	2.12456	2.07758	1.86031	1.81893	1.8612	1.83531	1.90965	1.93625	2.05053	2.40352	2.60275	2.47388	2.39986	2.34309	2.35548	2.36019	1.88745	2.35839	2.38378	2.31488	2.35113	1.8612	1.83531	1.90965	1.93625	1.81893	2.05053	2.40352	2.60275	2.61219	2.41732	2.47388	2.39986	2.35096	2.34309	2.35548	2.36019	1.88745	2.35839	2.38378	2.31488	2.35113	1.78425	1.81612	1.81247
Fe/Fe+Mg	0.176564	0.0817708	0.0862588	0.0578066	0.0951365	0.100225	0.139118	0.11222	0.13591	0.138934	0.134216	0.13686	0.06377	0.469394	0.313768	0.413568	0.49216	0.457702	0.451365	0.490246	0.711966	0.47977	0.540928	0.446946	0.458858	0.13591	0.138934	0.134216	0.13686	0.11222	0.06377	0.469394	0.313768	1	#DIV/0!	0.413568	0.49216	0.260579	0.457702	0.451365	0.490246	0.711966	0.47977	0.540928	0.446946	0.458858	0.0882053	0.0861398	0.088915
Mn/Mn+Fe	0.0127904	0.0174286	0.0160285	0.0128712	0.0105775	0.0048506	0.00977703	0.00817	0.00943949	0.006524	0.00929984	0.00341021	0.0113721	0.00581586	0.00120247	0.00450621	0.00901046	0.00747437	0.00665289	0.00643178	0.00295546	0.00827412	0.00508169	0.00570388	0.00744344	0.00943949	0.006524	0.00929984	0.00341021	0.00817	0.0113721	0.00581586	0.00120247	0.0174587	1	0.00450621	0.00901046	0.117558	0.00747437	0.00665289	0.00643178	0.00295546	0.00827412	0.00508169	0.00570388	0.00744344	0.00504098	0.00442219	0.00827344
Total Al	2.44336	2.48612	2.33866	3.18837	2.12456	2.07758	1.86031	1.81893	1.8612	1.83531	1.90965	1.93625	2.05053	2.40352	2.60275	2.47388	2.39986	2.34309	2.35548	2.36019	1.88745	2.35839	2.38378	2.31488	2.35113	1.8612	1.83531	1.90965	1.93625	1.81893	2.05053	2.40352	2.60275	2.61219	2.41732	2.47388	2.39986	2.35096	2.34309	2.35548	2.36019	1.88745	2.35839	2.38378	2.31488	2.35113	1.78425	1.81612	1.81247
Mg-Li	4.23349	4.13757	3.81913	4.33177	3.5883	4.14431	4.1585	3.59949	3.97229	3.73871	3.47977	3.66865	3.93984	2.9236	0.972453	2.8151	2.73815	3.14184	3.16026	3.00305	2.41884	2.83816	2.80925	3.29384	3.15686	3.97229	3.73871	3.47977	3.66865	3.59949	3.93984	2.9236	0.972453	-4.0556	-4.4331	2.8151	2.73815	-3.89064	3.14184	3.16026	3.00305	2.41884	2.83816	2.80925	3.29384	3.15686	4.73162	4.55368	4.71084
Fe+Mn+Ti-AlVI	1.24413	0.556088	0.581536	-0.111314	0.600115	0.632355	1.01804	0.685153	0.851536	0.890762	0.836036	0.851645	0.420557	3.08868	0.258091	2.72227	3.18387	3.13034	3.0874	3.368	6.45103	3.10409	3.84229	3.18677	3.26167	0.851536	0.890762	0.836036	0.851645	0.685153	0.420557	3.08868	0.258091	-1.87996	-1.8364	2.72227	3.18387	-1.86171	3.13034	3.0874	3.368	6.45103	3.10409	3.84229	3.18677	3.26167	0.63523	0.61554	0.635115
[truncated: 28 more columns]
